# Supplementary material
Source: PubMed Central journal article supplement (PMC8185309)
Supplement: 41435_2021_137_MOESM1_ESM.pdf [file 41435_2021_137_MOESM1_ESM.pdf]

# Colton

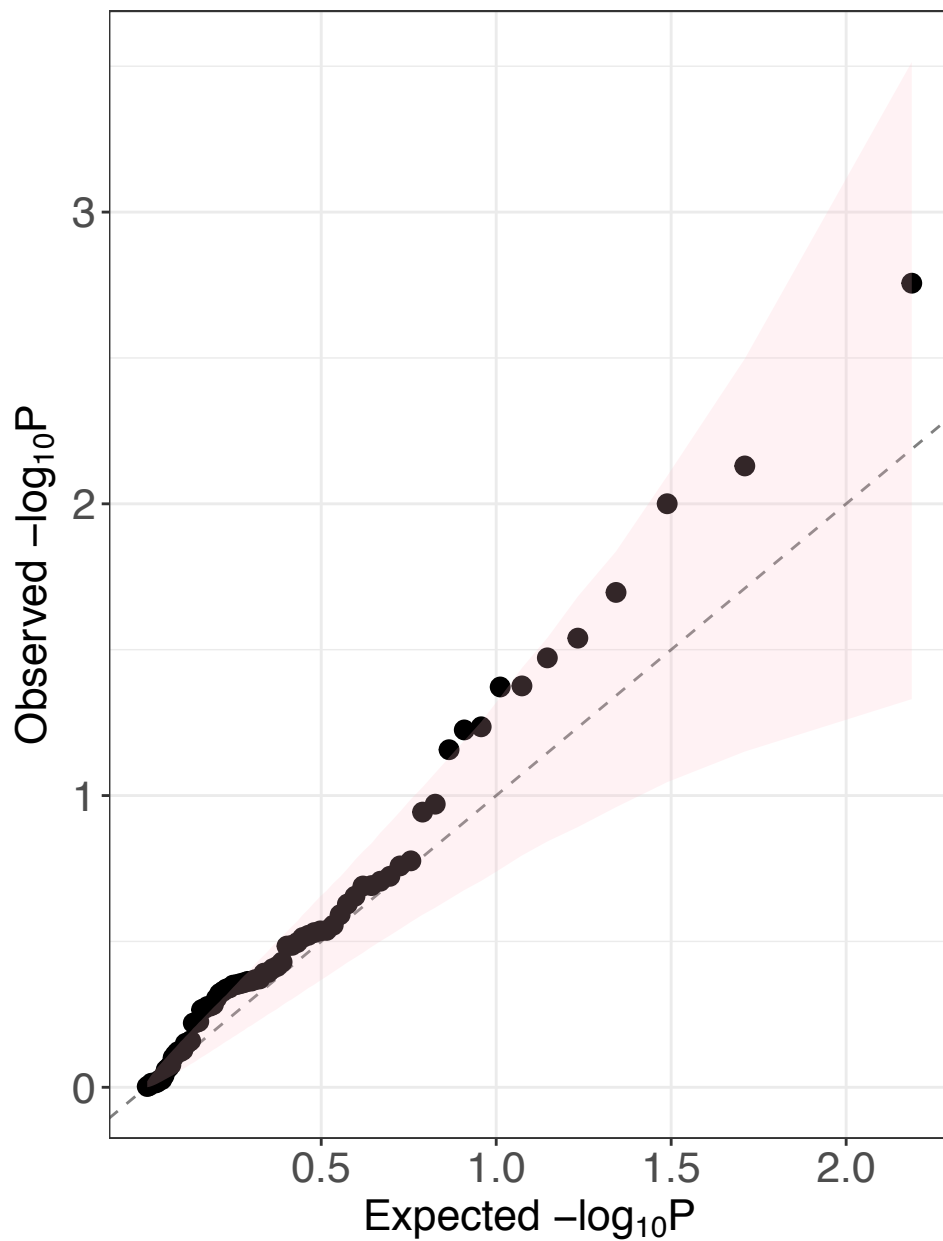

# Kell

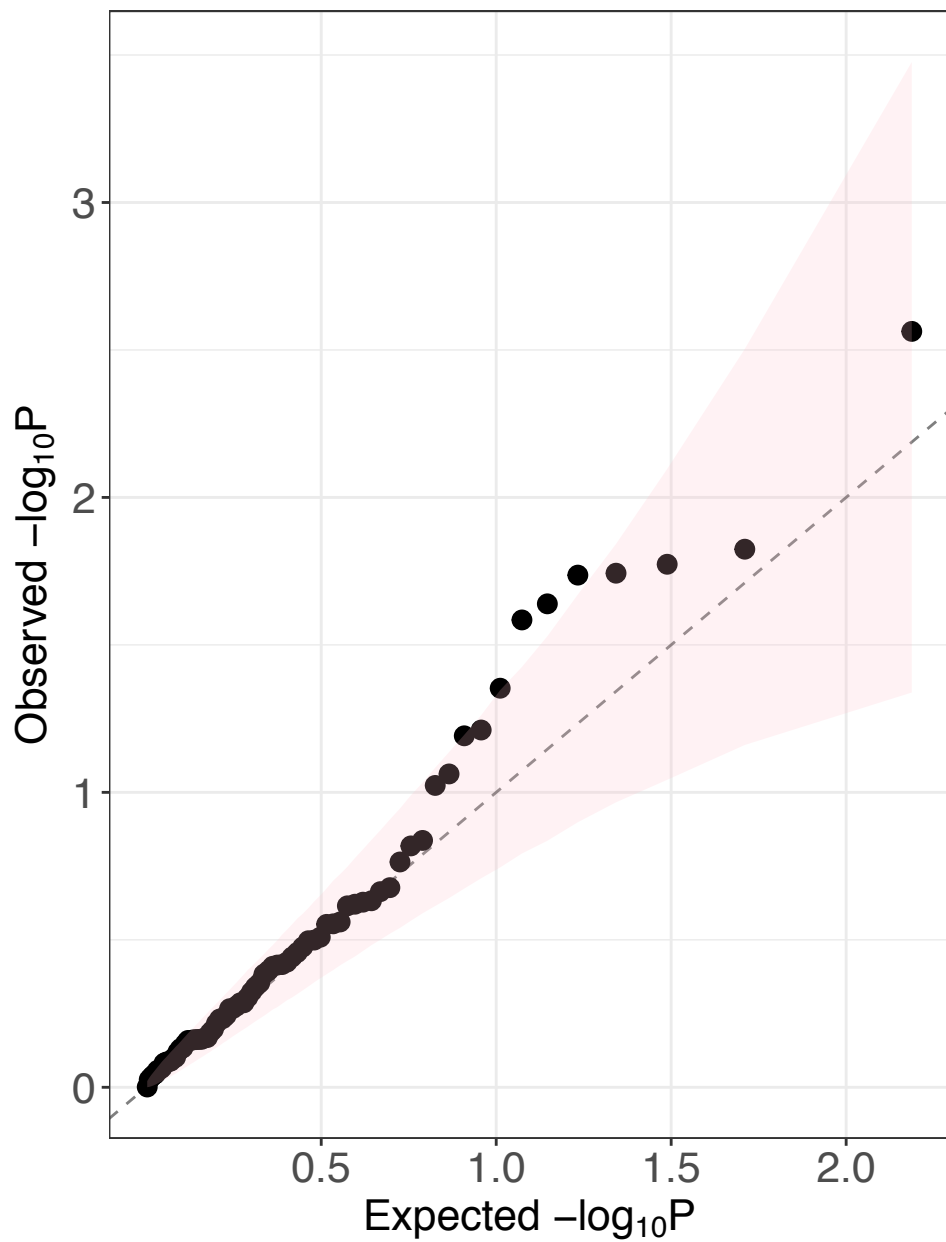

# Knops

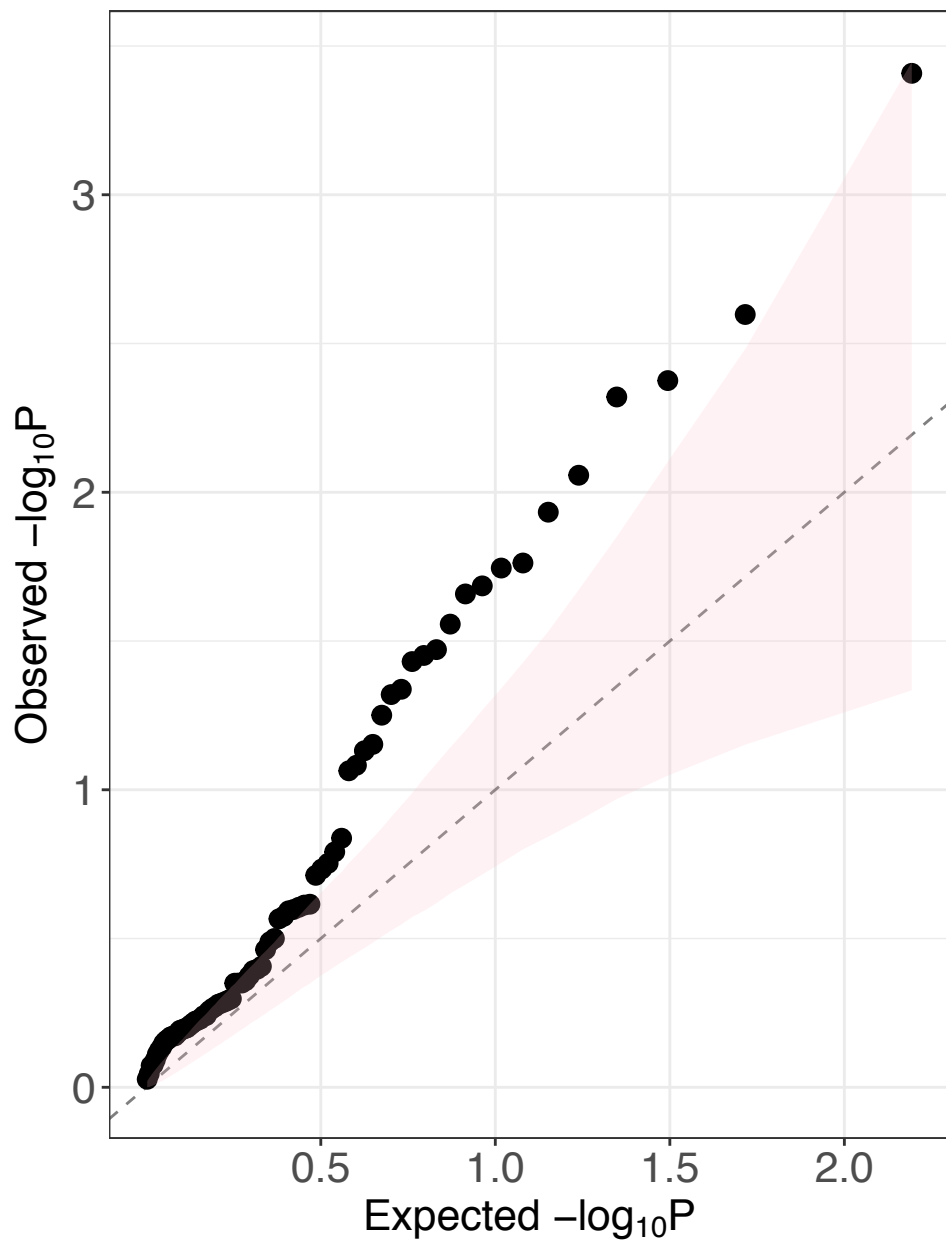

# Secretor

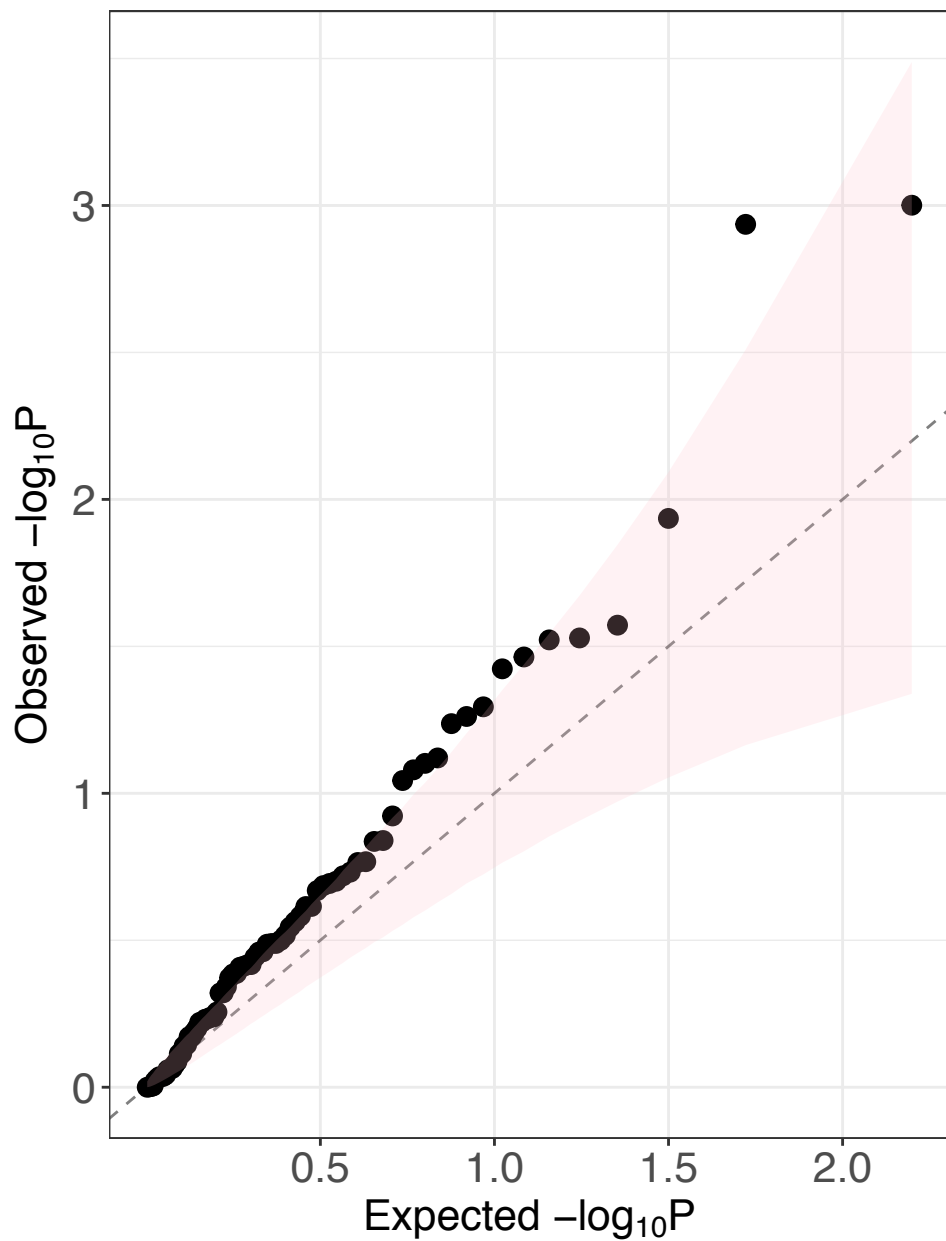

# Lewis

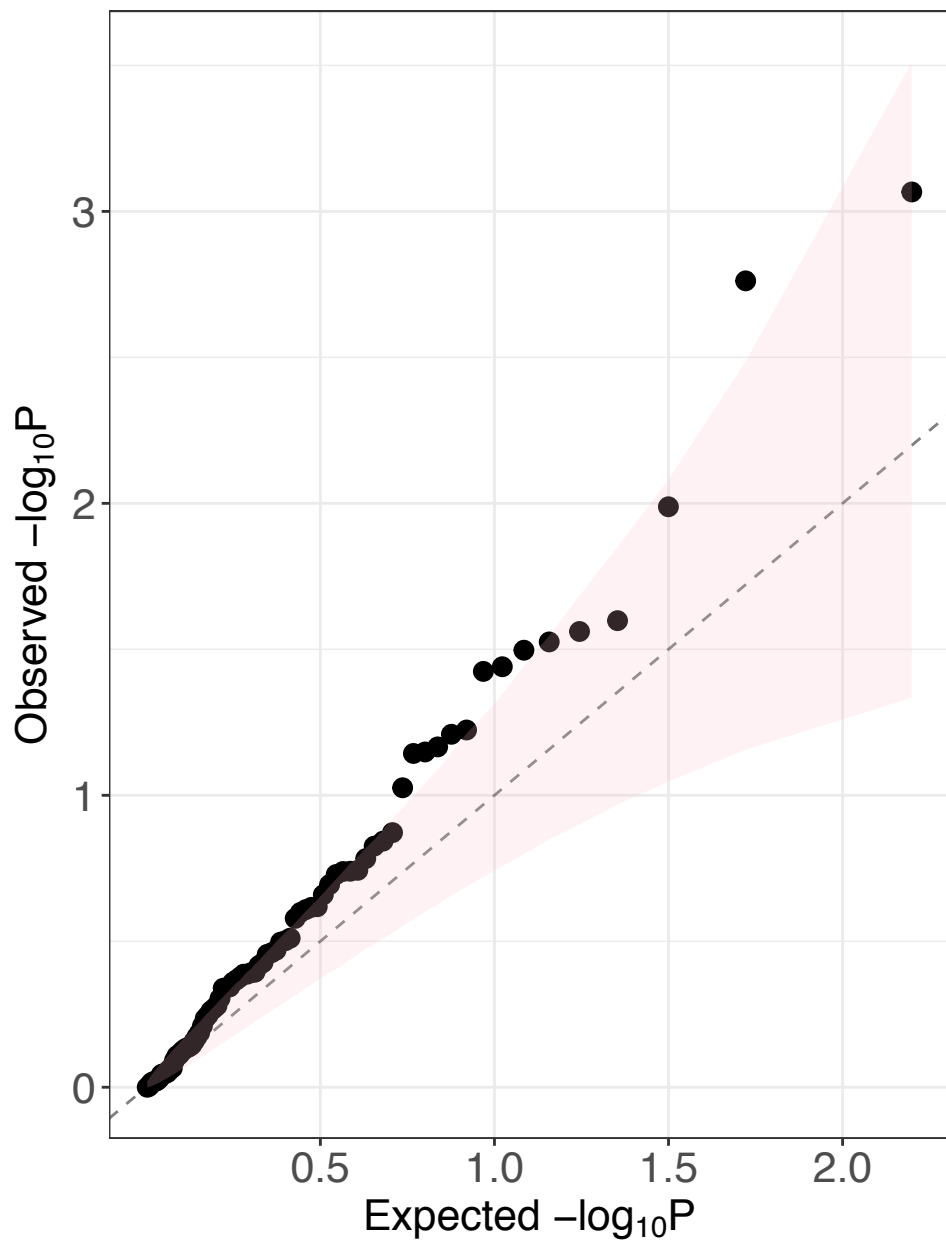

# Kidd

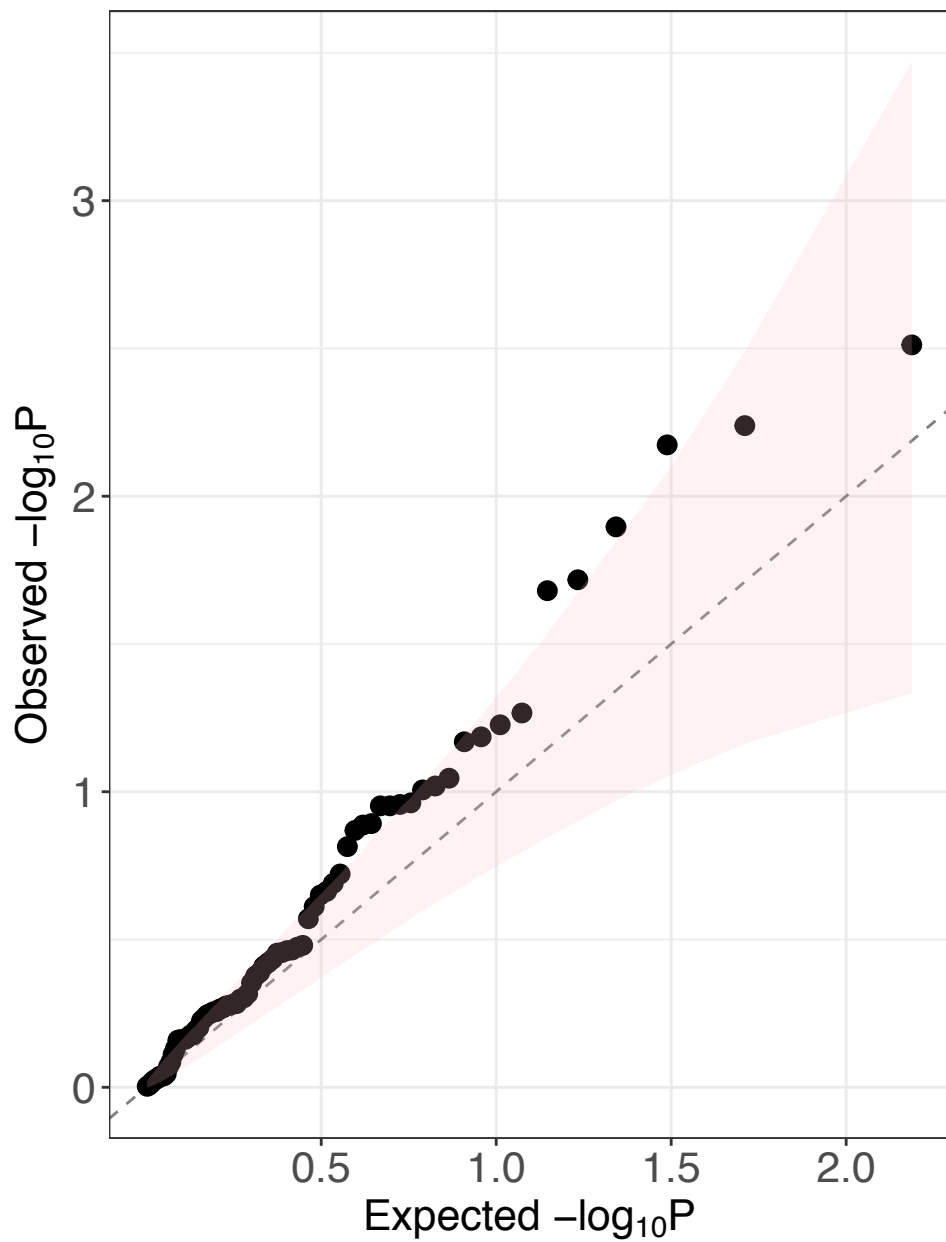

# RhE

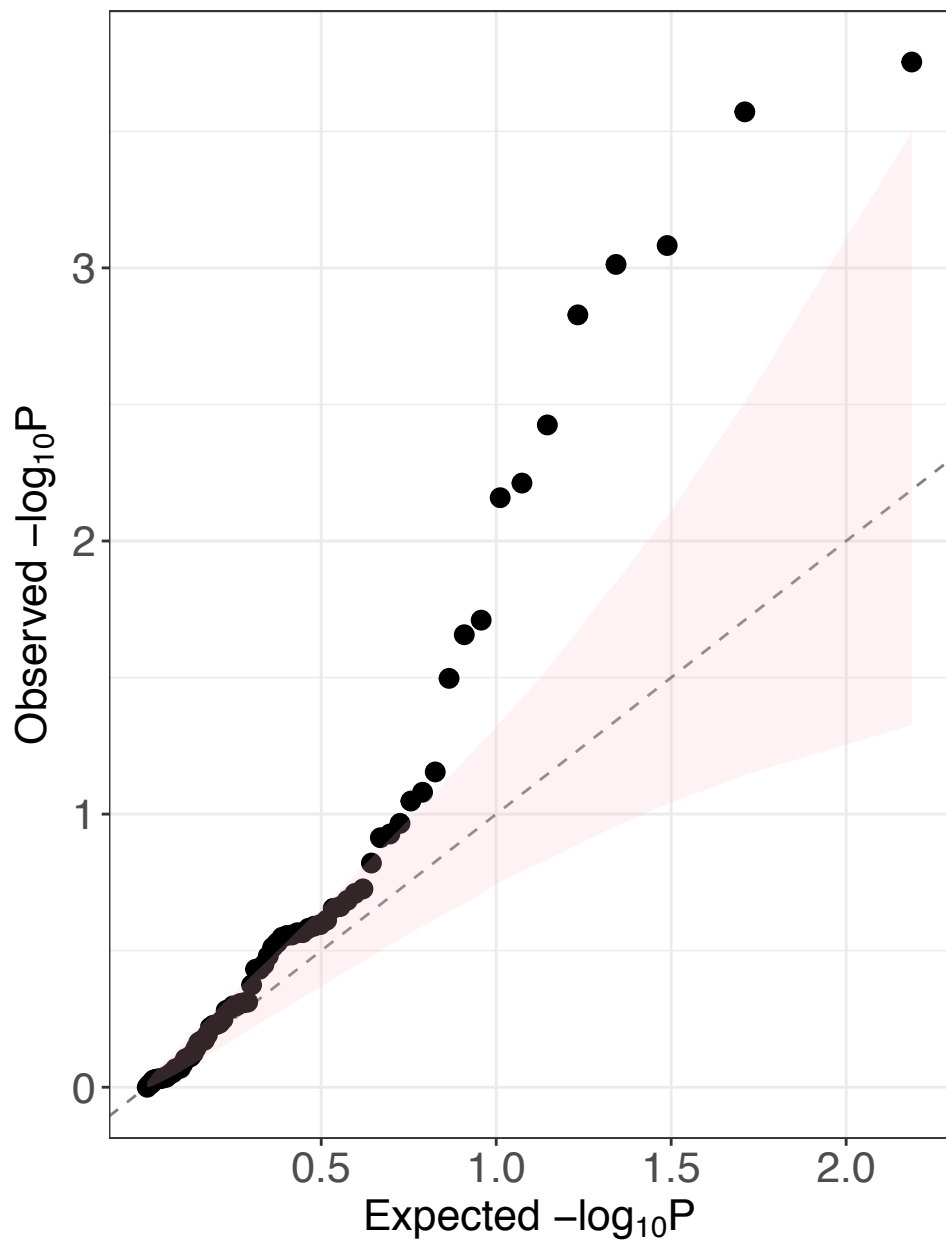

# Auberger

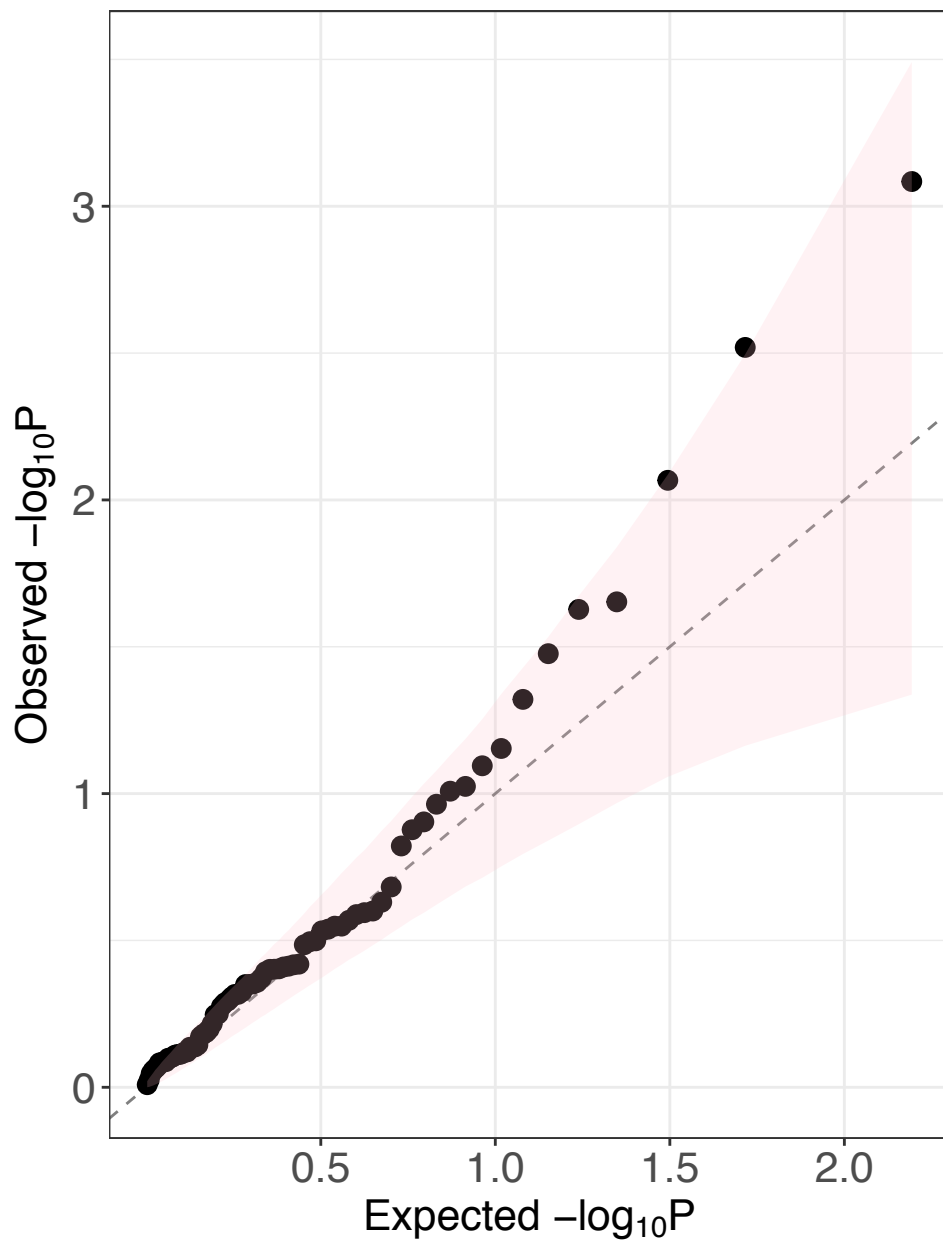



# Dombrock

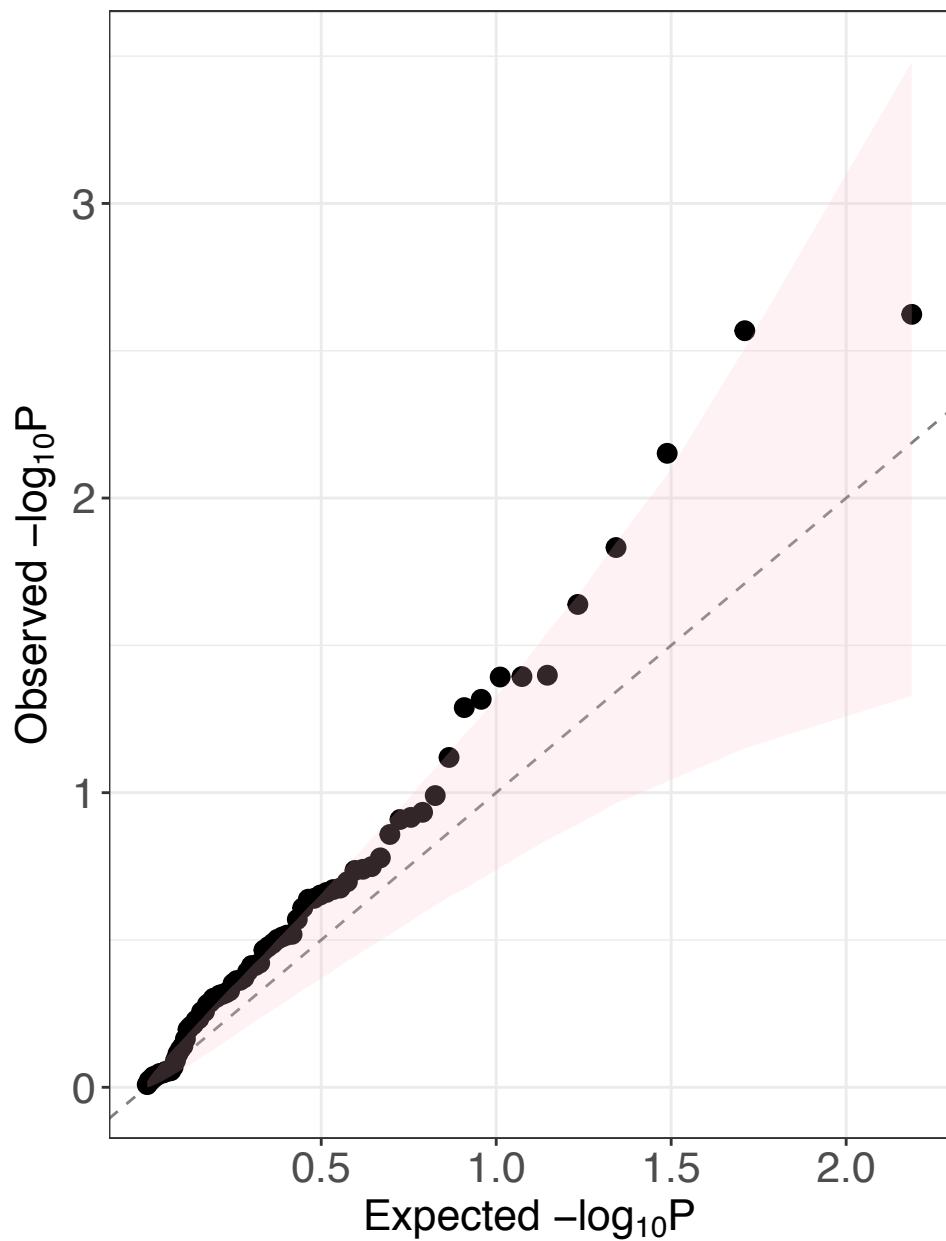

# Lutheran

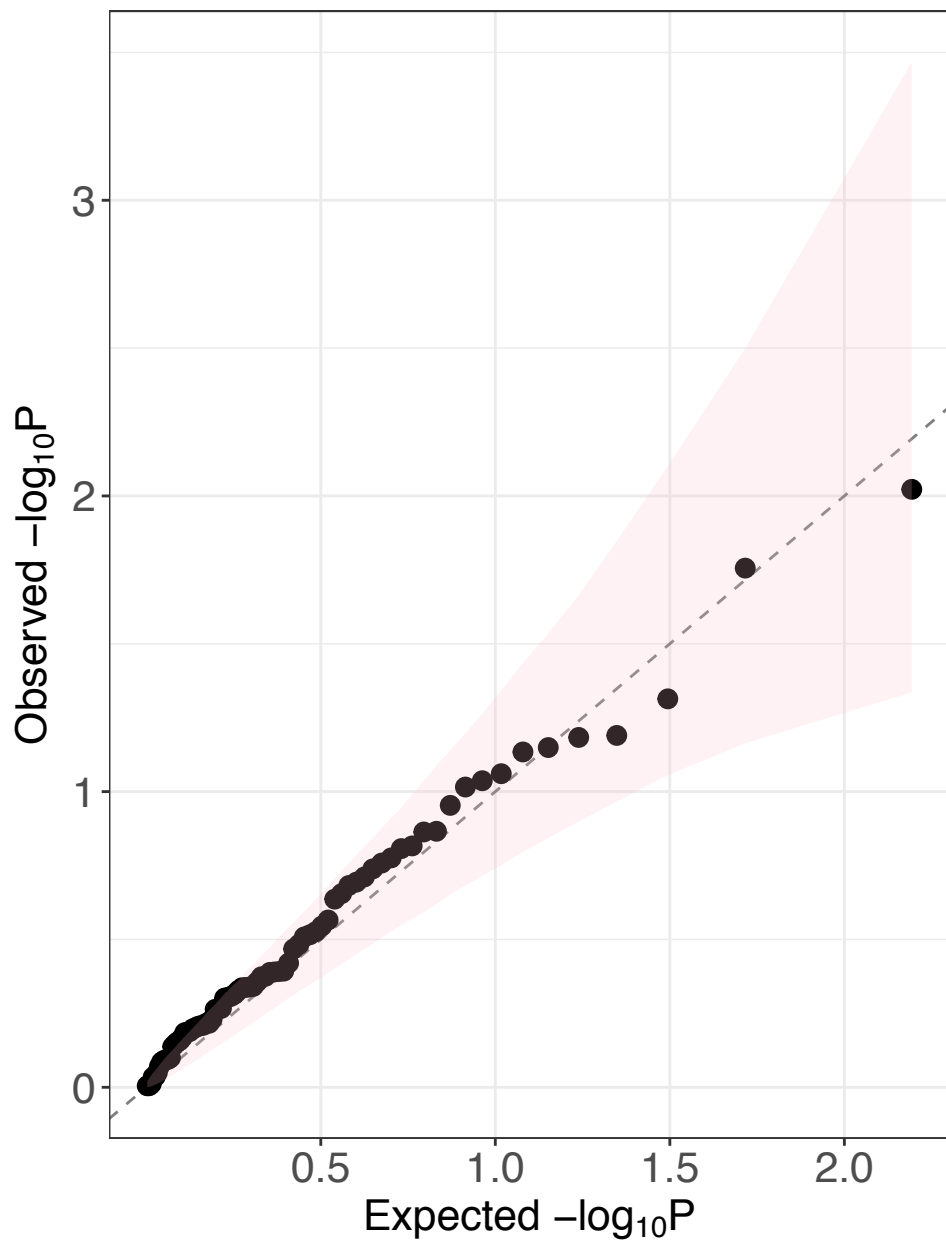

**Supplementary Figure 1.** Observed versus expected distribution of p-values for associations between circulating inflammatory markers and blood antigen groups. Each dot represents the joint Wald test of a linear or logistic model predicting marker concentration from blood type, adjusting for sex, age (5-year category), smoking status (never/former/current), study, and the first five principal components of population substructure. Shaded bands represent a bootstrapped 95% confidence interval generated from 10,000 replicates, and dotted lines represent predicted empirical distribution.
