# Supplementary material
Source: PubMed Central journal article supplement (PMC8185309)
Supplement: 41435_2021_137_MOESM2_ESM.pdf [file 41435_2021_137_MOESM2_ESM.pdf]

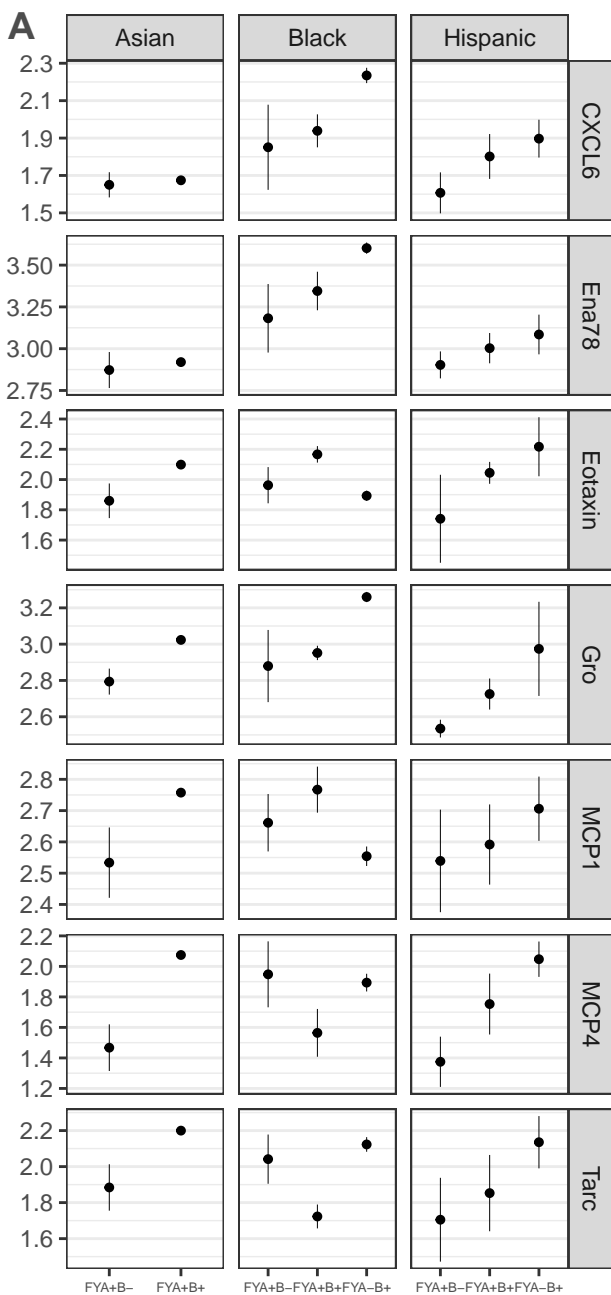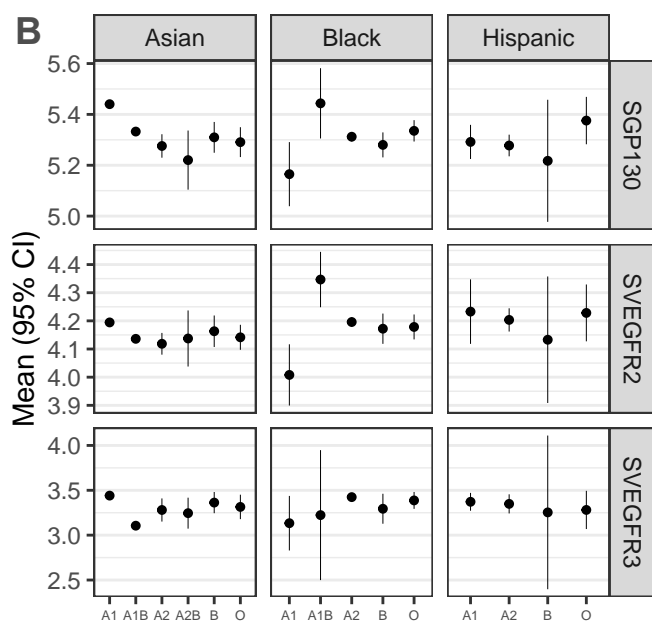

**Supplementary Figure 2.** Mean log<sub>10</sub>-transformed concentrations of inflammatory markers by blood type in non-White PLCO participants. Error bars show 95% confidence interval, and omitted points designate groups where no individual with a given blood type was present in the data. Panel A shows markers that were significantly associated with Duffy blood type in White participants, and panel B shows markers that were significantly associated with ABO blood type in White participants.
