# Supplementary material
Source: PubMed Central journal article supplement (PMC8185309)
Supplement: 41435_2021_137_MOESM3_ESM.pdf [file 41435_2021_137_MOESM3_ESM.pdf]

Supplementary Table 1

| Blood Group | Antigen Phenotype | Marker    | Dominant Estimate (95% CI) | Dominant P-value | Dominant Wald Joint P-value | Additive Estimate (95% CI) | Additive P-value | Additive Wald Joint P-value |
|-------------|-------------------|-----------|----------------------------|------------------|-----------------------------|----------------------------|------------------|-----------------------------|
| Duffy       | FYA+B+            | CXCL6 GCP | 0.04 (0.02 - 0.06)         | 0.000            | 0.000                       | 0.06 (0.05 - 0.07)         | 0.000            | 0.000                       |
| Duffy       | FYA-B+            | CXCL6 GCP | 0.09 (0.07 - 0.11)         | 0.000            | 0.000                       |                            |                  |                             |
| Duffy       | FYA+B+            | ENA 78    | 0.02 (-0.00 - 0.04)        | 0.054            | 0.000                       | 0.07 (0.06 - 0.09)         | 0.000            | 0.000                       |
| Duffy       | FYA-B+            | ENA 78    | 0.10 (0.08 - 0.13)         | 0.000            | 0.000                       |                            |                  |                             |
| Duffy       | FYA+B+            | EOTAXIN   | 0.08 (0.06 - 0.10)         | 0.000            | 0.000                       | 0.12 (0.10 - 0.13)         | 0.000            | 0.000                       |
| Duffy       | FYA-B+            | EOTAXIN   | 0.17 (0.15 - 0.19)         | 0.000            | 0.000                       |                            |                  |                             |
| Duffy       | FYA+B+            | GRO       | 0.03 (0.01 - 0.04)         | 0.000            | 0.000                       | 0.06 (0.05 - 0.07)         | 0.000            | 0.000                       |
| Duffy       | FYA-B+            | GRO       | 0.09 (0.07 - 0.10)         | 0.000            | 0.000                       |                            |                  |                             |
| Duffy       | FYA+B+            | MCP 1     | 0.08 (0.07 - 0.10)         | 0.000            | 0.000                       | 0.12 (0.11 - 0.13)         | 0.000            | 0.000                       |
| Duffy       | FYA-B+            | MCP 1     | 0.17 (0.15 - 0.18)         | 0.000            | 0.000                       |                            |                  |                             |
| Duffy       | FYA+B+            | MCP 4     | 0.09 (0.06 - 0.12)         | 0.000            | 0.000                       | 0.15 (0.12 - 0.17)         | 0.000            | 0.000                       |
| Duffy       | FYA-B+            | MCP 4     | 0.21 (0.18 - 0.24)         | 0.000            | 0.000                       |                            |                  |                             |
| Duffy       | FYA+B+            | TARC      | 0.03 (0.01 - 0.05)         | 0.009            | 0.000                       | 0.05 (0.03 - 0.07)         | 0.000            | 0.000                       |
| Duffy       | FYA-B+            | TARC      | 0.07 (0.05 - 0.10)         | 0.000            | 0.000                       |                            |                  |                             |
| ABO         | abA               | SGP130    | -0.02 (-0.03 - -0.01)      | 0.000            | 0.000                       | -0.02 (-0.04 - -0.01)      | 0.007            | 0.000                       |
| ABO         | abAB              | SGP130    | -0.00 (-0.02 - 0.02)       | 0.945            | 0.000                       | -0.01 (-0.04 - 0.02)       | 0.587            | 0.000                       |
| ABO         | abB               | SGP130    | 0.01 (0.00 - 0.02)         | 0.032            | 0.000                       | 0.02 (-0.00 - 0.04)        | 0.104            | 0.000                       |
| ABO         | abA               | SVEGFR2   | -0.04 (-0.05 - -0.03)      | 0.000            | 0.000                       | -0.03 (-0.05 - -0.01)      | 0.000            | 0.000                       |
| ABO         | abAB              | SVEGFR2   | -0.03 (-0.05 - -0.01)      | 0.006            | 0.000                       | -0.02 (-0.06 - 0.01)       | 0.181            | 0.000                       |
| ABO         | abB               | SVEGFR2   | 0.00 (-0.01 - 0.02)        | 0.708            | 0.000                       | 0.02 (-0.01 - 0.04)        | 0.178            | 0.000                       |
| ABO         | abA               | SVEGFR3   | -0.08 (-0.10 - -0.05)      | 0.000            | 0.000                       | -0.09 (-0.14 - -0.05)      | 0.000            | 0.000                       |
| ABO         | abAB              | SVEGFR3   | -0.03 (-0.07 - 0.02)       | 0.304            | 0.000                       | 0.04 (-0.06 - 0.14)        | 0.470            | 0.000                       |
| ABO         | abB               | SVEGFR3   | 0.03 (-0.00 - 0.07)        | 0.068            | 0.000                       | 0.09 (-0.00 - 0.17)        | 0.052            | 0.000                       |

Supplementary Table 2

| Blood Group | Antigen Phenotype | Marker           | Estimate (95% CI)     | P-value | Wald Joint P-value | Bonferroni Significant? | Logistic Model? | Converged? |
|-------------|-------------------|------------------|-----------------------|---------|--------------------|-------------------------|-----------------|------------|
| Secretor    | Nonsecretor       | ADIPONECTIN      | -0.00 (-0.04 - 0.04)  | 0.997   | 0.997              | FALSE                   | FALSE           | Converged  |
| Secretor    | Nonsecretor       | ADIPSIN          | 0.03 (0.00 - 0.05)    | 0.030   | 0.030              | FALSE                   | FALSE           | Converged  |
| Secretor    | Nonsecretor       | AMYLIN           | 0.01 (-0.04 - 0.07)   | 0.602   | 0.602              | FALSE                   | FALSE           | Converged  |
| Secretor    | Nonsecretor       | BCA 1            | 0.01 (-0.02 - 0.03)   | 0.584   | 0.584              | FALSE                   | FALSE           | Converged  |
| Secretor    | Nonsecretor       | C PEPTIDE        | 0.01 (-0.03 - 0.06)   | 0.587   | 0.587              | FALSE                   | FALSE           | Converged  |
| Secretor    | Nonsecretor       | CCL19 MIP3B      | 0.02 (-0.01 - 0.04)   | 0.146   | 0.146              | FALSE                   | FALSE           | Converged  |
| Secretor    | Nonsecretor       | CCL20 MIP3A      | -0.00 (-0.04 - 0.04)  | 0.907   | 0.907              | FALSE                   | FALSE           | Converged  |
| Secretor    | Nonsecretor       | CRP              | 0.03 (-0.01 - 0.08)   | 0.145   | 0.145              | FALSE                   | FALSE           | Converged  |
| Secretor    | Nonsecretor       | CTACK            | 0.02 (0.01 - 0.03)    | 0.001   | 0.001              | FALSE                   | FALSE           | Converged  |
| Secretor    | Nonsecretor       | CXCL11   TAC     | -0.01 (-0.04 - 0.01)  | 0.347   | 0.347              | FALSE                   | FALSE           | Converged  |
| Secretor    | Nonsecretor       | CXCL6 GCP2       | -0.01 (-0.03 - 0.01)  | 0.191   | 0.191              | FALSE                   | FALSE           | Converged  |
| Secretor    | Nonsecretor       | CXCL9 MIG        | 0.02 (-0.00 - 0.04)   | 0.051   | 0.051              | FALSE                   | FALSE           | Converged  |
| Secretor    | Nonsecretor       | EGF              | -0.01 (-0.05 - 0.03)  | 0.555   | 0.555              | FALSE                   | FALSE           | Converged  |
| Secretor    | Nonsecretor       | ENA 78           | -0.01 (-0.04 - 0.01)  | 0.214   | 0.214              | FALSE                   | FALSE           | Converged  |
| Secretor    | Nonsecretor       | EOTAXIN 2        | 0.00 (-0.03 - 0.03)   | 0.863   | 0.863              | FALSE                   | FALSE           | Converged  |
| Secretor    | Nonsecretor       | EOTAXIN          | -0.00 (-0.02 - 0.02)  | 0.921   | 0.921              | FALSE                   | FALSE           | Converged  |
| Secretor    | Nonsecretor       | G CSF            | -0.03 (-0.06 - 0.01)  | 0.119   | 0.119              | FALSE                   | FALSE           | Converged  |
| Secretor    | Nonsecretor       | GIP              | -0.04 (-0.11 - 0.03)  | 0.242   | 0.243              | FALSE                   | FALSE           | Converged  |
| Secretor    | Nonsecretor       | GRO              | 0.00 (-0.02 - 0.02)   | 0.994   | 0.994              | FALSE                   | FALSE           | Converged  |
| Secretor    | Nonsecretor       | IL 13            | -0.18 (-0.69 - 0.32)  | 0.476   | 0.478              | FALSE                   | FALSE           | Converged  |
| Secretor    | Nonsecretor       | IL 16            | -0.02 (-0.06 - 0.02)  | 0.346   | 0.346              | FALSE                   | FALSE           | Converged  |
| Secretor    | Nonsecretor       | IL 17            | 0.02 (-0.07 - 0.10)   | 0.724   | 0.724              | FALSE                   | FALSE           | Converged  |
| Secretor    | Nonsecretor       | IL 23            | -0.35 (-0.76 - 0.05)  | 0.087   | 0.090              | FALSE                   | FALSE           | Converged  |
| Secretor    | Nonsecretor       | IL 8             | -0.00 (-0.04 - 0.03)  | 0.872   | 0.872              | FALSE                   | FALSE           | Converged  |
| Secretor    | Nonsecretor       | INSULIN          | 0.02 (-0.05 - 0.09)   | 0.599   | 0.599              | FALSE                   | FALSE           | Converged  |
| Secretor    | Nonsecretor       | IP 10            | -0.00 (-0.02 - 0.01)  | 0.649   | 0.649              | FALSE                   | FALSE           | Converged  |
| Secretor    | Nonsecretor       | LEPTIN           | 0.02 (-0.05 - 0.08)   | 0.631   | 0.631              | FALSE                   | FALSE           | Converged  |
| Secretor    | Nonsecretor       | LIPOCALIN 2 NGAL | 0.05 (0.00 - 0.09)    | 0.037   | 0.038              | FALSE                   | FALSE           | Converged  |
| Secretor    | Nonsecretor       | MCP 1            | -0.00 (-0.02 - 0.01)  | 0.838   | 0.838              | FALSE                   | FALSE           | Converged  |
| Secretor    | Nonsecretor       | MCP 2            | -0.02 (-0.04 - 0.01)  | 0.199   | 0.199              | FALSE                   | FALSE           | Converged  |
| Secretor    | Nonsecretor       | MCP 4            | -0.02 (-0.05 - 0.01)  | 0.273   | 0.273              | FALSE                   | FALSE           | Converged  |
| Secretor    | Nonsecretor       | MDC              | 0.01 (-0.01 - 0.03)   | 0.172   | 0.172              | FALSE                   | FALSE           | Converged  |
| Secretor    | Nonsecretor       | MIP 1B           | -0.01 (-0.03 - 0.02)  | 0.673   | 0.673              | FALSE                   | FALSE           | Converged  |
| Secretor    | Nonsecretor       | MIP 1D           | -0.01 (-0.03 - 0.01)  | 0.261   | 0.262              | FALSE                   | FALSE           | Converged  |
| Secretor    | Nonsecretor       | PAI 1            | 0.02 (-0.01 - 0.04)   | 0.185   | 0.185              | FALSE                   | FALSE           | Converged  |
| Secretor    | Nonsecretor       | PP               | -0.09 (-0.16 - -0.01) | 0.026   | 0.027              | FALSE                   | FALSE           | Converged  |
| Secretor    | Nonsecretor       | RESISTIN         | 0.04 (0.01 - 0.07)    | 0.011   | 0.012              | FALSE                   | FALSE           | Converged  |
| Secretor    | Nonsecretor       | SAA              | 0.02 (-0.03 - 0.07)   | 0.388   | 0.388              | FALSE                   | FALSE           | Converged  |
| Secretor    | Nonsecretor       | SAP              | 0.01 (-0.01 - 0.02)   | 0.243   | 0.243              | FALSE                   | FALSE           | Converged  |
| Secretor    | Nonsecretor       | SDF 1A B         | 0.00 (-0.02 - 0.02)   | 0.990   | 0.990              | FALSE                   | FALSE           | Converged  |
| Secretor    | Nonsecretor       | SEGFR            | 0.00 (-0.01 - 0.01)   | 0.717   | 0.717              | FALSE                   | FALSE           | Converged  |
| Secretor    | Nonsecretor       | SGP130           | 0.01 (0.00 - 0.02)    | 0.030   | 0.030              | FALSE                   | FALSE           | Converged  |
| Secretor    | Nonsecretor       | SIL4R            | 0.00 (-0.01 - 0.01)   | 0.867   | 0.867              | FALSE                   | FALSE           | Converged  |
| Secretor    | Nonsecretor       | SIL6R            | 0.00 (-0.01 - 0.02)   | 0.455   | 0.455              | FALSE                   | FALSE           | Converged  |
| Secretor    | Nonsecretor       | SILRII           | 0.01 (-0.01 - 0.02)   | 0.316   | 0.317              | FALSE                   | FALSE           | Converged  |
| Secretor    | Nonsecretor       | STNFRI           | -0.00 (-0.02 - 0.01)  | 0.672   | 0.672              | FALSE                   | FALSE           | Converged  |
| Secretor    | Nonsecretor       | STNFRII          | 0.01 (-0.01 - 0.02)   | 0.383   | 0.383              | FALSE                   | FALSE           | Converged  |
| Secretor    | Nonsecretor       | SVEGFR2          | 0.00 (-0.01 - 0.01)   | 0.818   | 0.818              | FALSE                   | FALSE           | Converged  |
| Secretor    | Nonsecretor       | SVEGFR3          | 0.03 (-0.00 - 0.05)   | 0.079   | 0.079              | FALSE                   | FALSE           | Converged  |
| Secretor    | Nonsecretor       | TARC             | -0.00 (-0.03 - 0.02)  | 0.952   | 0.952              | FALSE                   | FALSE           | Converged  |
| Secretor    | Nonsecretor       | TGF A            | 0.02 (-0.03 - 0.06)   | 0.477   | 0.477              | FALSE                   | FALSE           | Converged  |
| Secretor    | Nonsecretor       | TGF B1           | 0.03 (-0.02 - 0.09)   | 0.206   | 0.206              | FALSE                   | FALSE           | Converged  |
| Secretor    | Nonsecretor       | TNFA             | 0.01 (-0.01 - 0.03)   | 0.361   | 0.361              | FALSE                   | FALSE           | Converged  |
| Secretor    | Nonsecretor       | TPO              | -0.03 (-0.10 - 0.03)  | 0.285   | 0.285              | FALSE                   | FALSE           | Converged  |
| Secretor    | Nonsecretor       | TRAIL            | 0.01 (-0.02 - 0.03)   | 0.576   | 0.576              | FALSE                   | FALSE           | Converged  |
| Secretor    | Nonsecretor       | VEGF             | 0.00 (-0.05 - 0.06)   | 0.921   | 0.921              | FALSE                   | FALSE           | Converged  |
| Secretor    | Nonsecretor       | X6CKINE          | 0.01 (-0.02 - 0.04)   | 0.577   | 0.577              | FALSE                   | FALSE           | Converged  |
| Dombrock    | DoA+B+            | ADIPONECTIN      | 0.04 (0.01 - 0.07)    | 0.011   | 0.040              | FALSE                   | FALSE           | Converged  |
| Dombrock    | DoA-B+            | ADIPONECTIN      | 0.03 (-0.02 - 0.07)   | 0.216   | 0.040              | FALSE                   | FALSE           | Converged  |
| Dombrock    | DoA+B+            | ADIPSIN          | -0.00 (-0.02 - 0.01)  | 0.644   | 0.898              | FALSE                   | FALSE           | Converged  |
| Dombrock    | DoA-B+            | ADIPSIN          | -0.00 (-0.03 - 0.02)  | 0.785   | 0.898              | FALSE                   | FALSE           | Converged  |
| Dombrock    | DoA+B+            | AMYLIN           | 0.03 (-0.02 - 0.07)   | 0.205   | 0.445              | FALSE                   | FALSE           | Converged  |
| Dombrock    | DoA-B+            | AMYLIN           | 0.01 (-0.05 - 0.07)   | 0.673   | 0.445              | FALSE                   | FALSE           | Converged  |
| Dombrock    | DoA+B+            | BCA 1            | 0.01 (-0.00 - 0.03)   | 0.083   | 0.218              | FALSE                   | FALSE           | Converged  |
| Dombrock    | DoA-B+            | BCA 1            | 0.01 (-0.02 - 0.03)   | 0.594   | 0.218              | FALSE                   | FALSE           | Converged  |
| Dombrock    | DoA+B+            | C PEPTIDE        | 0.03 (-0.00 - 0.07)   | 0.080   | 0.213              | FALSE                   | FALSE           | Converged  |
| Dombrock    | DoA-B+            | C PEPTIDE        | 0.02 (-0.03 - 0.07)   | 0.385   | 0.213              | FALSE                   | FALSE           | Converged  |
| Dombrock    | DoA+B+            | CCL19 MIP3B      | -0.01 (-0.03 - 0.01)  | 0.175   | 0.003              | FALSE                   | FALSE           | Converged  |
| Dombrock    | DoA-B+            | CCL19 MIP3B      | -0.04 (-0.06 - -0.02) | 0.001   | 0.003              | FALSE                   | FALSE           | Converged  |
| Dombrock    | DoA+B+            | CCL20 MIP3A      | -0.01 (-0.05 - 0.02)  | 0.373   | 0.040              | FALSE                   | FALSE           | Converged  |
| Dombrock    | DoA-B+            | CCL20 MIP3A      | -0.05 (-0.10 - -0.01) | 0.012   | 0.040              | FALSE                   | FALSE           | Converged  |
| Dombrock    | DoA+B+            | CRP              | -0.02 (-0.05 - 0.02)  | 0.342   | 0.483              | FALSE                   | FALSE           | Converged  |

|          |        |                  |                      |       |       |       |       |           |
|----------|--------|------------------|----------------------|-------|-------|-------|-------|-----------|
| Dombrock | DoA-B+ | CRP              | -0.03 (-0.07 - 0.02) | 0.282 | 0.483 | FALSE | FALSE | Converged |
| Dombrock | DoA+B+ | CTACK            | 0.00 (-0.01 - 0.01)  | 0.404 | 0.586 | FALSE | FALSE | Converged |
| Dombrock | DoA-B+ | CTACK            | 0.01 (-0.01 - 0.02)  | 0.368 | 0.586 | FALSE | FALSE | Converged |
| Dombrock | DoA+B+ | CXCL11   TAC     | -0.00 (-0.02 - 0.02) | 0.864 | 0.896 | FALSE | FALSE | Converged |
| Dombrock | DoA-B+ | CXCL11   TAC     | 0.00 (-0.02 - 0.03)  | 0.744 | 0.896 | FALSE | FALSE | Converged |
| Dombrock | DoA+B+ | CXCL6 GCP2       | -0.01 (-0.03 - 0.00) | 0.089 | 0.230 | FALSE | FALSE | Converged |
| Dombrock | DoA-B+ | CXCL6 GCP2       | -0.01 (-0.03 - 0.01) | 0.349 | 0.230 | FALSE | FALSE | Converged |
| Dombrock | DoA+B+ | CXCL9 MIG        | 0.01 (-0.01 - 0.03)  | 0.358 | 0.076 | FALSE | FALSE | Converged |
| Dombrock | DoA-B+ | CXCL9 MIG        | -0.02 (-0.05 - 0.01) | 0.131 | 0.076 | FALSE | FALSE | Converged |
| Dombrock | DoA+B+ | EGF              | 0.02 (-0.02 - 0.05)  | 0.372 | 0.315 | FALSE | FALSE | Converged |
| Dombrock | DoA-B+ | EGF              | 0.04 (-0.01 - 0.08)  | 0.134 | 0.315 | FALSE | FALSE | Converged |
| Dombrock | DoA+B+ | ENA 78           | -0.01 (-0.03 - 0.00) | 0.087 | 0.121 | FALSE | FALSE | Converged |
| Dombrock | DoA-B+ | ENA 78           | -0.02 (-0.04 - 0.00) | 0.079 | 0.121 | FALSE | FALSE | Converged |
| Dombrock | DoA+B+ | EOTAXIN 2        | 0.00 (-0.02 - 0.03)  | 0.685 | 0.920 | FALSE | FALSE | Converged |
| Dombrock | DoA-B+ | EOTAXIN 2        | 0.00 (-0.03 - 0.04)  | 0.823 | 0.920 | FALSE | FALSE | Converged |
| Dombrock | DoA+B+ | EOTAXIN          | 0.01 (-0.00 - 0.03)  | 0.064 | 0.178 | FALSE | FALSE | Converged |
| Dombrock | DoA-B+ | EOTAXIN          | 0.01 (-0.01 - 0.03)  | 0.346 | 0.178 | FALSE | FALSE | Converged |
| Dombrock | DoA+B+ | G CSF            | 0.02 (-0.01 - 0.05)  | 0.135 | 0.303 | FALSE | FALSE | Converged |
| Dombrock | DoA-B+ | G CSF            | 0.02 (-0.02 - 0.05)  | 0.330 | 0.303 | FALSE | FALSE | Converged |
| Dombrock | DoA+B+ | GIP              | -0.00 (-0.06 - 0.06) | 0.995 | 0.811 | FALSE | FALSE | Converged |
| Dombrock | DoA-B+ | GIP              | 0.02 (-0.06 - 0.11)  | 0.556 | 0.811 | FALSE | FALSE | Converged |
| Dombrock | DoA+B+ | GRO              | -0.00 (-0.01 - 0.01) | 0.584 | 0.554 | FALSE | FALSE | Converged |
| Dombrock | DoA-B+ | GRO              | 0.00 (-0.01 - 0.02)  | 0.537 | 0.554 | FALSE | FALSE | Converged |
| Dombrock | DoA+B+ | IL 13            | 0.17 (-0.09 - 0.44)  | 0.197 | 0.434 | FALSE | FALSE | Converged |
| Dombrock | DoA-B+ | IL 13            | 0.09 (-0.25 - 0.43)  | 0.599 | 0.434 | FALSE | FALSE | Converged |
| Dombrock | DoA+B+ | IL 16            | 0.01 (-0.02 - 0.05)  | 0.454 | 0.386 | FALSE | FALSE | Converged |
| Dombrock | DoA-B+ | IL 16            | -0.02 (-0.06 - 0.03) | 0.482 | 0.386 | FALSE | FALSE | Converged |
| Dombrock | DoA+B+ | IL 17            | -0.01 (-0.08 - 0.05) | 0.692 | 0.139 | FALSE | FALSE | Converged |
| Dombrock | DoA-B+ | IL 17            | -0.08 (-0.16 - 0.00) | 0.054 | 0.139 | FALSE | FALSE | Converged |
| Dombrock | DoA+B+ | IL 23            | 0.01 (-0.24 - 0.25)  | 0.940 | 0.486 | FALSE | FALSE | Converged |
| Dombrock | DoA-B+ | IL 23            | 0.19 (-0.13 - 0.51)  | 0.243 | 0.486 | FALSE | FALSE | Converged |
| Dombrock | DoA+B+ | IL 8             | 0.01 (-0.02 - 0.04)  | 0.497 | 0.554 | FALSE | FALSE | Converged |
| Dombrock | DoA-B+ | IL 8             | 0.02 (-0.02 - 0.06)  | 0.288 | 0.554 | FALSE | FALSE | Converged |
| Dombrock | DoA+B+ | INSULIN          | 0.06 (0.01 - 0.11)   | 0.022 | 0.051 | FALSE | FALSE | Converged |
| Dombrock | DoA-B+ | INSULIN          | 0.01 (-0.06 - 0.08)  | 0.863 | 0.051 | FALSE | FALSE | Converged |
| Dombrock | DoA+B+ | IP 10            | -0.00 (-0.02 - 0.01) | 0.717 | 0.478 | FALSE | FALSE | Converged |
| Dombrock | DoA-B+ | IP 10            | -0.01 (-0.03 - 0.01) | 0.228 | 0.478 | FALSE | FALSE | Converged |
| Dombrock | DoA+B+ | LEPTIN           | 0.07 (0.01 - 0.12)   | 0.014 | 0.048 | FALSE | FALSE | Converged |
| Dombrock | DoA-B+ | LEPTIN           | 0.05 (-0.03 - 0.12)  | 0.216 | 0.048 | FALSE | FALSE | Converged |
| Dombrock | DoA+B+ | LIPOCALIN 2 NGAL | -0.01 (-0.05 - 0.03) | 0.487 | 0.612 | FALSE | FALSE | Converged |
| Dombrock | DoA-B+ | LIPOCALIN 2 NGAL | -0.03 (-0.09 - 0.03) | 0.346 | 0.612 | FALSE | FALSE | Converged |
| Dombrock | DoA+B+ | MCP 1            | 0.00 (-0.01 - 0.02)  | 0.429 | 0.117 | FALSE | FALSE | Converged |
| Dombrock | DoA-B+ | MCP 1            | 0.02 (0.00 - 0.03)   | 0.039 | 0.117 | FALSE | FALSE | Converged |
| Dombrock | DoA+B+ | MCP 2            | -0.00 (-0.02 - 0.02) | 0.963 | 0.891 | FALSE | FALSE | Converged |
| Dombrock | DoA-B+ | MCP 2            | 0.01 (-0.02 - 0.03)  | 0.682 | 0.891 | FALSE | FALSE | Converged |
| Dombrock | DoA+B+ | MCP 4            | 0.00 (-0.02 - 0.03)  | 0.782 | 0.908 | FALSE | FALSE | Converged |
| Dombrock | DoA-B+ | MCP 4            | -0.00 (-0.04 - 0.03) | 0.850 | 0.908 | FALSE | FALSE | Converged |
| Dombrock | DoA+B+ | MDC              | -0.01 (-0.02 - 0.00) | 0.181 | 0.379 | FALSE | FALSE | Converged |
| Dombrock | DoA-B+ | MDC              | -0.00 (-0.02 - 0.01) | 0.831 | 0.379 | FALSE | FALSE | Converged |
| Dombrock | DoA+B+ | MIP 1B           | -0.01 (-0.03 - 0.01) | 0.242 | 0.002 | FALSE | FALSE | Converged |
| Dombrock | DoA-B+ | MIP 1B           | 0.03 (0.01 - 0.06)   | 0.014 | 0.002 | FALSE | FALSE | Converged |
| Dombrock | DoA+B+ | MIP 1D           | -0.01 (-0.02 - 0.01) | 0.478 | 0.201 | FALSE | FALSE | Converged |
| Dombrock | DoA-B+ | MIP 1D           | 0.01 (-0.01 - 0.03)  | 0.266 | 0.201 | FALSE | FALSE | Converged |
| Dombrock | DoA+B+ | PAI 1            | -0.01 (-0.03 - 0.01) | 0.336 | 0.325 | FALSE | FALSE | Converged |
| Dombrock | DoA-B+ | PAI 1            | -0.02 (-0.05 - 0.01) | 0.145 | 0.325 | FALSE | FALSE | Converged |
| Dombrock | DoA+B+ | PP               | 0.02 (-0.04 - 0.08)  | 0.463 | 0.514 | FALSE | FALSE | Converged |
| Dombrock | DoA-B+ | PP               | 0.05 (-0.04 - 0.13)  | 0.269 | 0.514 | FALSE | FALSE | Converged |
| Dombrock | DoA+B+ | RESISTIN         | -0.02 (-0.04 - 0.01) | 0.206 | 0.425 | FALSE | FALSE | Converged |
| Dombrock | DoA-B+ | RESISTIN         | -0.01 (-0.04 - 0.03) | 0.754 | 0.425 | FALSE | FALSE | Converged |
| Dombrock | DoA+B+ | SAA              | -0.01 (-0.05 - 0.02) | 0.457 | 0.246 | FALSE | FALSE | Converged |
| Dombrock | DoA-B+ | SAA              | -0.04 (-0.09 - 0.01) | 0.094 | 0.246 | FALSE | FALSE | Converged |
| Dombrock | DoA+B+ | SAP              | -0.00 (-0.01 - 0.01) | 0.726 | 0.769 | FALSE | FALSE | Converged |
| Dombrock | DoA-B+ | SAP              | -0.01 (-0.02 - 0.01) | 0.469 | 0.769 | FALSE | FALSE | Converged |
| Dombrock | DoA+B+ | SDF 1A B         | 0.01 (-0.01 - 0.02)  | 0.281 | 0.524 | FALSE | FALSE | Converged |
| Dombrock | DoA-B+ | SDF 1A B         | 0.00 (-0.02 - 0.02)  | 0.906 | 0.524 | FALSE | FALSE | Converged |
| Dombrock | DoA+B+ | SEGFR            | 0.00 (-0.01 - 0.01)  | 0.712 | 0.881 | FALSE | FALSE | Converged |
| Dombrock | DoA-B+ | SEGFR            | 0.00 (-0.01 - 0.01)  | 0.643 | 0.881 | FALSE | FALSE | Converged |
| Dombrock | DoA+B+ | SGP130           | -0.00 (-0.01 - 0.00) | 0.423 | 0.725 | FALSE | FALSE | Converged |
| Dombrock | DoA-B+ | SGP130           | -0.00 (-0.01 - 0.01) | 0.772 | 0.725 | FALSE | FALSE | Converged |
| Dombrock | DoA+B+ | SIL4R            | -0.01 (-0.03 - 0.00) | 0.036 | 0.040 | FALSE | FALSE | Converged |
| Dombrock | DoA-B+ | SIL4R            | -0.02 (-0.04 - 0.00) | 0.028 | 0.040 | FALSE | FALSE | Converged |
| Dombrock | DoA+B+ | SIL6R            | 0.01 (-0.00 - 0.01)  | 0.252 | 0.386 | FALSE | FALSE | Converged |
| Dombrock | DoA-B+ | SIL6R            | 0.01 (-0.01 - 0.02)  | 0.245 | 0.386 | FALSE | FALSE | Converged |

|          |        |              |                       |       |       |       |       |           |
|----------|--------|--------------|-----------------------|-------|-------|-------|-------|-----------|
| Dombrock | DoA+B+ | SILRII       | -0.00 (-0.02 - 0.01)  | 0.485 | 0.685 | FALSE | FALSE | Converged |
| Dombrock | DoA-B+ | SILRII       | -0.01 (-0.02 - 0.01)  | 0.441 | 0.685 | FALSE | FALSE | Converged |
| Dombrock | DoA+B+ | STNFRI       | 0.00 (-0.01 - 0.01)   | 0.813 | 0.945 | FALSE | FALSE | Converged |
| Dombrock | DoA-B+ | STNFRI       | -0.00 (-0.01 - 0.01)  | 0.925 | 0.945 | FALSE | FALSE | Converged |
| Dombrock | DoA+B+ | STNFRII      | -0.00 (-0.01 - 0.01)  | 0.758 | 0.211 | FALSE | FALSE | Converged |
| Dombrock | DoA-B+ | STNFRII      | -0.01 (-0.02 - 0.00)  | 0.089 | 0.211 | FALSE | FALSE | Converged |
| Dombrock | DoA+B+ | SVEGFR2      | -0.00 (-0.01 - 0.01)  | 0.849 | 0.495 | FALSE | FALSE | Converged |
| Dombrock | DoA-B+ | SVEGFR2      | -0.01 (-0.02 - 0.01)  | 0.267 | 0.495 | FALSE | FALSE | Converged |
| Dombrock | DoA+B+ | SVEGFR3      | 0.01 (-0.02 - 0.03)   | 0.649 | 0.636 | FALSE | FALSE | Converged |
| Dombrock | DoA-B+ | SVEGFR3      | 0.02 (-0.02 - 0.05)   | 0.342 | 0.636 | FALSE | FALSE | Converged |
| Dombrock | DoA+B+ | TARC         | 0.00 (-0.02 - 0.02)   | 0.687 | 0.878 | FALSE | FALSE | Converged |
| Dombrock | DoA-B+ | TARC         | -0.00 (-0.03 - 0.03)  | 0.904 | 0.878 | FALSE | FALSE | Converged |
| Dombrock | DoA+B+ | TGF A        | -0.01 (-0.05 - 0.02)  | 0.439 | 0.007 | FALSE | FALSE | Converged |
| Dombrock | DoA-B+ | TGF A        | -0.07 (-0.12 - -0.03) | 0.002 | 0.007 | FALSE | FALSE | Converged |
| Dombrock | DoA+B+ | TGF B1       | 0.00 (-0.04 - 0.04)   | 0.980 | 0.948 | FALSE | FALSE | Converged |
| Dombrock | DoA-B+ | TGF B1       | -0.01 (-0.06 - 0.04)  | 0.797 | 0.948 | FALSE | FALSE | Converged |
| Dombrock | DoA+B+ | TNFA         | 0.01 (-0.01 - 0.03)   | 0.180 | 0.405 | FALSE | FALSE | Converged |
| Dombrock | DoA-B+ | TNFA         | 0.01 (-0.02 - 0.03)   | 0.622 | 0.405 | FALSE | FALSE | Converged |
| Dombrock | DoA+B+ | TPO          | -0.00 (-0.05 - 0.05)  | 0.978 | 0.102 | FALSE | FALSE | Converged |
| Dombrock | DoA-B+ | TPO          | -0.07 (-0.13 - 0.00)  | 0.057 | 0.102 | FALSE | FALSE | Converged |
| Dombrock | DoA+B+ | TRAIL        | 0.00 (-0.01 - 0.02)   | 0.586 | 0.854 | FALSE | FALSE | Converged |
| Dombrock | DoA-B+ | TRAIL        | 0.00 (-0.02 - 0.03)   | 0.707 | 0.854 | FALSE | FALSE | Converged |
| Dombrock | DoA+B+ | VEGF         | 0.02 (-0.03 - 0.06)   | 0.466 | 0.592 | FALSE | FALSE | Converged |
| Dombrock | DoA-B+ | VEGF         | -0.01 (-0.07 - 0.05)  | 0.720 | 0.592 | FALSE | FALSE | Converged |
| Dombrock | DoA+B+ | X6CKINE      | 0.00 (-0.02 - 0.03)   | 0.723 | 0.309 | FALSE | FALSE | Converged |
| Dombrock | DoA-B+ | X6CKINE      | -0.02 (-0.06 - 0.01)  | 0.232 | 0.309 | FALSE | FALSE | Converged |
| RhE      | Ee     | ADIPONECTIN  | -0.01 (-0.04 - 0.03)  | 0.641 | 0.257 | FALSE | FALSE | Converged |
| RhE      | ee     | ADIPONECTIN  | 0.10 (-0.03 - 0.22)   | 0.124 | 0.257 | FALSE | FALSE | Converged |
| RhE      | Ee     | ADIPSIN      | -0.01 (-0.03 - 0.01)  | 0.264 | 0.523 | FALSE | FALSE | Converged |
| RhE      | ee     | ADIPSIN      | -0.01 (-0.08 - 0.05)  | 0.721 | 0.523 | FALSE | FALSE | Converged |
| RhE      | Ee     | AMYLIN       | -0.01 (-0.07 - 0.04)  | 0.687 | 0.518 | FALSE | FALSE | Converged |
| RhE      | ee     | AMYLIN       | 0.07 (-0.06 - 0.20)   | 0.304 | 0.518 | FALSE | FALSE | Converged |
| RhE      | Ee     | BCA 1        | -0.00 (-0.02 - 0.02)  | 0.678 | 0.070 | FALSE | FALSE | Converged |
| RhE      | ee     | BCA 1        | -0.07 (-0.13 - -0.01) | 0.022 | 0.070 | FALSE | FALSE | Converged |
| RhE      | Ee     | C PEPTIDE    | -0.01 (-0.07 - 0.04)  | 0.569 | 0.207 | FALSE | FALSE | Converged |
| RhE      | ee     | C PEPTIDE    | 0.08 (-0.02 - 0.18)   | 0.103 | 0.207 | FALSE | FALSE | Converged |
| RhE      | Ee     | CCL19 MIP3B  | -0.02 (-0.04 - -0.00) | 0.041 | 0.022 | FALSE | FALSE | Converged |
| RhE      | ee     | CCL19 MIP3B  | -0.06 (-0.13 - -0.00) | 0.046 | 0.022 | FALSE | FALSE | Converged |
| RhE      | Ee     | CCL20 MIP3A  | -0.01 (-0.05 - 0.03)  | 0.610 | 0.854 | FALSE | FALSE | Converged |
| RhE      | ee     | CCL20 MIP3A  | 0.01 (-0.11 - 0.13)   | 0.844 | 0.854 | FALSE | FALSE | Converged |
| RhE      | Ee     | CRP          | -0.02 (-0.07 - 0.02)  | 0.260 | 0.490 | FALSE | FALSE | Converged |
| RhE      | ee     | CRP          | -0.04 (-0.21 - 0.13)  | 0.650 | 0.490 | FALSE | FALSE | Converged |
| RhE      | Ee     | CTACK        | 0.02 (0.01 - 0.03)    | 0.000 | 0.001 | FALSE | FALSE | Converged |
| RhE      | ee     | CTACK        | 0.01 (-0.02 - 0.05)   | 0.444 | 0.001 | FALSE | FALSE | Converged |
| RhE      | Ee     | CXCL11   TAC | -0.00 (-0.03 - 0.02)  | 0.899 | 0.272 | FALSE | FALSE | Converged |
| RhE      | ee     | CXCL11   TAC | -0.07 (-0.15 - 0.01)  | 0.106 | 0.272 | FALSE | FALSE | Converged |
| RhE      | Ee     | CXCL6 GCP2   | 0.00 (-0.01 - 0.02)   | 0.710 | 0.928 | FALSE | FALSE | Converged |
| RhE      | ee     | CXCL6 GCP2   | -0.00 (-0.07 - 0.06)  | 0.935 | 0.928 | FALSE | FALSE | Converged |
| RhE      | Ee     | CXCL9 MIG    | -0.01 (-0.03 - 0.02)  | 0.558 | 0.751 | FALSE | FALSE | Converged |
| RhE      | ee     | CXCL9 MIG    | -0.02 (-0.09 - 0.05)  | 0.606 | 0.751 | FALSE | FALSE | Converged |
| RhE      | Ee     | EGF          | 0.00 (-0.04 - 0.04)   | 0.944 | 0.890 | FALSE | FALSE | Converged |
| RhE      | ee     | EGF          | 0.03 (-0.10 - 0.16)   | 0.630 | 0.890 | FALSE | FALSE | Converged |
| RhE      | Ee     | ENA 78       | 0.01 (-0.01 - 0.04)   | 0.160 | 0.331 | FALSE | FALSE | Converged |
| RhE      | ee     | ENA 78       | 0.02 (-0.06 - 0.10)   | 0.575 | 0.331 | FALSE | FALSE | Converged |
| RhE      | Ee     | EOTAXIN 2    | 0.00 (-0.03 - 0.03)   | 0.951 | 0.978 | FALSE | FALSE | Converged |
| RhE      | ee     | EOTAXIN 2    | 0.01 (-0.07 - 0.08)   | 0.837 | 0.978 | FALSE | FALSE | Converged |
| RhE      | Ee     | EOTAXIN      | 0.00 (-0.01 - 0.02)   | 0.650 | 0.821 | FALSE | FALSE | Converged |
| RhE      | ee     | EOTAXIN      | 0.01 (-0.03 - 0.06)   | 0.637 | 0.821 | FALSE | FALSE | Converged |
| RhE      | Ee     | G CSF        | 0.00 (-0.03 - 0.03)   | 0.993 | 0.675 | FALSE | FALSE | Converged |
| RhE      | ee     | G CSF        | -0.05 (-0.15 - 0.06)  | 0.377 | 0.675 | FALSE | FALSE | Converged |
| RhE      | Ee     | GIP          | -0.05 (-0.12 - 0.02)  | 0.169 | 0.001 | FALSE | FALSE | Converged |
| RhE      | ee     | GIP          | 0.33 (0.14 - 0.53)    | 0.001 | 0.001 | FALSE | FALSE | Converged |
| RhE      | Ee     | GRO          | 0.00 (-0.01 - 0.02)   | 0.806 | 0.565 | FALSE | FALSE | Converged |
| RhE      | ee     | GRO          | 0.03 (-0.02 - 0.07)   | 0.292 | 0.565 | FALSE | FALSE | Converged |
| RhE      | Ee     | IL 13        | 0.47 (0.14 - 0.79)    | 0.005 | 0.000 | FALSE | FALSE | Converged |
| RhE      | ee     | IL 13        | -0.81 (-1.41 - -0.22) | 0.007 | 0.000 | FALSE | FALSE | Converged |
| RhE      | Ee     | IL 16        | -0.03 (-0.07 - 0.01)  | 0.134 | 0.295 | FALSE | FALSE | Converged |
| RhE      | ee     | IL 16        | -0.04 (-0.21 - 0.12)  | 0.597 | 0.295 | FALSE | FALSE | Converged |
| RhE      | Ee     | IL 17        | -0.01 (-0.09 - 0.06)  | 0.749 | 0.151 | FALSE | FALSE | Converged |
| RhE      | ee     | IL 17        | 0.26 (-0.01 - 0.53)   | 0.058 | 0.151 | FALSE | FALSE | Converged |
| RhE      | Ee     | IL 23        | 0.13 (-0.14 - 0.41)   | 0.347 | 0.592 | FALSE | FALSE | Converged |
| RhE      | ee     | IL 23        | -0.01 (-0.39 - 0.36)  | 0.942 | 0.592 | FALSE | FALSE | Converged |
| RhE      | Ee     | IL 8         | 0.01 (-0.03 - 0.04)   | 0.751 | 0.920 | FALSE | FALSE | Converged |

|      |        |                  |                       |       |       |       |       |           |
|------|--------|------------------|-----------------------|-------|-------|-------|-------|-----------|
| RhE  | ee     | IL8              | 0.02 (-0.12 - 0.16)   | 0.786 | 0.920 | FALSE | FALSE | Converged |
| RhE  | Ee     | INSULIN          | 0.01 (-0.05 - 0.08)   | 0.703 | 0.603 | FALSE | FALSE | Converged |
| RhE  | ee     | INSULIN          | 0.08 (-0.08 - 0.24)   | 0.338 | 0.603 | FALSE | FALSE | Converged |
| RhE  | Ee     | IP10             | -0.02 (-0.03 - 0.00)  | 0.090 | 0.083 | FALSE | FALSE | Converged |
| RhE  | ee     | IP10             | -0.04 (-0.08 - 0.01)  | 0.113 | 0.083 | FALSE | FALSE | Converged |
| RhE  | Ee     | LEPTIN           | 0.00 (-0.06 - 0.07)   | 0.916 | 0.930 | FALSE | FALSE | Converged |
| RhE  | ee     | LEPTIN           | -0.03 (-0.20 - 0.14)  | 0.723 | 0.930 | FALSE | FALSE | Converged |
| RhE  | Ee     | LIPOCALIN 2 NGAL | -0.07 (-0.13 - -0.01) | 0.030 | 0.032 | FALSE | FALSE | Converged |
| RhE  | ee     | LIPOCALIN 2 NGAL | -0.29 (-0.67 - 0.09)  | 0.130 | 0.032 | FALSE | FALSE | Converged |
| RhE  | Ee     | MCP1             | -0.00 (-0.02 - 0.01)  | 0.711 | 0.673 | FALSE | FALSE | Converged |
| RhE  | ee     | MCP1             | -0.02 (-0.06 - 0.02)  | 0.405 | 0.673 | FALSE | FALSE | Converged |
| RhE  | Ee     | MCP2             | 0.01 (-0.01 - 0.03)   | 0.305 | 0.000 | FALSE | FALSE | Converged |
| RhE  | ee     | MCP2             | 0.09 (0.05 - 0.13)    | 0.000 | 0.000 | FALSE | FALSE | Converged |
| RhE  | Ee     | MCP4             | 0.01 (-0.02 - 0.04)   | 0.685 | 0.920 | FALSE | FALSE | Converged |
| RhE  | ee     | MCP4             | 0.00 (-0.09 - 0.09)   | 0.934 | 0.920 | FALSE | FALSE | Converged |
| RhE  | Ee     | MDC              | -0.00 (-0.02 - 0.01)  | 0.778 | 0.934 | FALSE | FALSE | Converged |
| RhE  | ee     | MDC              | -0.01 (-0.06 - 0.05)  | 0.799 | 0.934 | FALSE | FALSE | Converged |
| RhE  | Ee     | MIP1B            | 0.02 (-0.01 - 0.04)   | 0.182 | 0.221 | FALSE | FALSE | Converged |
| RhE  | ee     | MIP1B            | 0.05 (-0.03 - 0.14)   | 0.225 | 0.221 | FALSE | FALSE | Converged |
| RhE  | Ee     | MIP1D            | 0.02 (-0.00 - 0.04)   | 0.104 | 0.245 | FALSE | FALSE | Converged |
| RhE  | ee     | MIP1D            | -0.01 (-0.06 - 0.05)  | 0.775 | 0.245 | FALSE | FALSE | Converged |
| RhE  | Ee     | PAI1             | -0.02 (-0.04 - 0.01)  | 0.161 | 0.007 | FALSE | FALSE | Converged |
| RhE  | ee     | PAI1             | -0.11 (-0.19 - -0.04) | 0.003 | 0.007 | FALSE | FALSE | Converged |
| RhE  | Ee     | PP               | -0.06 (-0.14 - 0.01)  | 0.104 | 0.090 | FALSE | FALSE | Converged |
| RhE  | ee     | PP               | 0.13 (-0.06 - 0.31)   | 0.179 | 0.090 | FALSE | FALSE | Converged |
| RhE  | Ee     | RESISTIN         | -0.01 (-0.04 - 0.03)  | 0.662 | 0.001 | FALSE | FALSE | Converged |
| RhE  | ee     | RESISTIN         | -0.22 (-0.33 - -0.11) | 0.000 | 0.001 | FALSE | FALSE | Converged |
| RhE  | Ee     | SAA              | -0.02 (-0.06 - 0.02)  | 0.316 | 0.583 | FALSE | FALSE | Converged |
| RhE  | ee     | SAA              | -0.03 (-0.18 - 0.12)  | 0.731 | 0.583 | FALSE | FALSE | Converged |
| RhE  | Ee     | SAP              | -0.01 (-0.02 - 0.00)  | 0.179 | 0.282 | FALSE | FALSE | Converged |
| RhE  | ee     | SAP              | 0.01 (-0.03 - 0.05)   | 0.470 | 0.282 | FALSE | FALSE | Converged |
| RhE  | Ee     | SDF1A B          | 0.01 (-0.01 - 0.02)   | 0.240 | 0.370 | FALSE | FALSE | Converged |
| RhE  | ee     | SDF1A B          | 0.02 (-0.03 - 0.08)   | 0.389 | 0.370 | FALSE | FALSE | Converged |
| RhE  | Ee     | SEGFR            | 0.01 (-0.00 - 0.01)   | 0.130 | 0.272 | FALSE | FALSE | Converged |
| RhE  | ee     | SEGFR            | 0.01 (-0.01 - 0.03)   | 0.496 | 0.272 | FALSE | FALSE | Converged |
| RhE  | Ee     | SGP130           | 0.00 (-0.01 - 0.01)   | 0.492 | 0.643 | FALSE | FALSE | Converged |
| RhE  | ee     | SGP130           | -0.01 (-0.04 - 0.02)  | 0.556 | 0.643 | FALSE | FALSE | Converged |
| RhE  | Ee     | SIL4R            | -0.00 (-0.02 - 0.01)  | 0.879 | 0.773 | FALSE | FALSE | Converged |
| RhE  | ee     | SIL4R            | -0.02 (-0.08 - 0.04)  | 0.479 | 0.773 | FALSE | FALSE | Converged |
| RhE  | Ee     | SIL6R            | 0.01 (-0.00 - 0.02)   | 0.254 | 0.504 | FALSE | FALSE | Converged |
| RhE  | ee     | SIL6R            | 0.01 (-0.04 - 0.05)   | 0.742 | 0.504 | FALSE | FALSE | Converged |
| RhE  | Ee     | SILRII           | 0.02 (0.00 - 0.03)    | 0.014 | 0.019 | FALSE | FALSE | Converged |
| RhE  | ee     | SILRII           | -0.04 (-0.10 - 0.02)  | 0.220 | 0.019 | FALSE | FALSE | Converged |
| RhE  | Ee     | STNFRI           | 0.01 (-0.00 - 0.02)   | 0.133 | 0.278 | FALSE | FALSE | Converged |
| RhE  | ee     | STNFRI           | -0.01 (-0.04 - 0.03)  | 0.671 | 0.278 | FALSE | FALSE | Converged |
| RhE  | Ee     | STNFRII          | 0.01 (-0.01 - 0.02)   | 0.363 | 0.356 | FALSE | FALSE | Converged |
| RhE  | ee     | STNFRII          | -0.02 (-0.06 - 0.02)  | 0.291 | 0.356 | FALSE | FALSE | Converged |
| RhE  | Ee     | SVEGFR2          | 0.00 (-0.01 - 0.01)   | 0.583 | 0.856 | FALSE | FALSE | Converged |
| RhE  | ee     | SVEGFR2          | -0.00 (-0.03 - 0.03)  | 0.954 | 0.856 | FALSE | FALSE | Converged |
| RhE  | Ee     | SVEGFR3          | 0.02 (-0.01 - 0.05)   | 0.193 | 0.370 | FALSE | FALSE | Converged |
| RhE  | ee     | SVEGFR3          | -0.02 (-0.11 - 0.07)  | 0.655 | 0.370 | FALSE | FALSE | Converged |
| RhE  | Ee     | TARC             | 0.01 (-0.01 - 0.04)   | 0.306 | 0.590 | FALSE | FALSE | Converged |
| RhE  | ee     | TARC             | 0.01 (-0.08 - 0.10)   | 0.876 | 0.590 | FALSE | FALSE | Converged |
| RhE  | Ee     | TGF A            | -0.00 (-0.04 - 0.04)  | 0.928 | 0.942 | FALSE | FALSE | Converged |
| RhE  | ee     | TGF A            | -0.02 (-0.17 - 0.12)  | 0.735 | 0.942 | FALSE | FALSE | Converged |
| RhE  | Ee     | TGF B1           | 0.02 (-0.03 - 0.07)   | 0.413 | 0.004 | FALSE | FALSE | Converged |
| RhE  | ee     | TGF B1           | -0.06 (-0.10 - -0.01) | 0.010 | 0.004 | FALSE | FALSE | Converged |
| RhE  | Ee     | TNFA             | -0.00 (-0.02 - 0.02)  | 0.818 | 0.971 | FALSE | FALSE | Converged |
| RhE  | ee     | TNFA             | -0.00 (-0.07 - 0.06)  | 0.923 | 0.971 | FALSE | FALSE | Converged |
| RhE  | Ee     | TPO              | -0.04 (-0.10 - 0.02)  | 0.231 | 0.488 | FALSE | FALSE | Converged |
| RhE  | ee     | TPO              | -0.01 (-0.25 - 0.23)  | 0.952 | 0.488 | FALSE | FALSE | Converged |
| RhE  | Ee     | TRAIL            | 0.00 (-0.02 - 0.02)   | 0.800 | 0.780 | FALSE | FALSE | Converged |
| RhE  | ee     | TRAIL            | 0.02 (-0.04 - 0.08)   | 0.500 | 0.780 | FALSE | FALSE | Converged |
| RhE  | Ee     | VEGF             | -0.02 (-0.07 - 0.04)  | 0.499 | 0.685 | FALSE | FALSE | Converged |
| RhE  | ee     | VEGF             | 0.05 (-0.13 - 0.22)   | 0.613 | 0.685 | FALSE | FALSE | Converged |
| RhE  | Ee     | X6CKINE          | -0.00 (-0.04 - 0.03)  | 0.801 | 0.905 | FALSE | FALSE | Converged |
| RhE  | ee     | X6CKINE          | 0.02 (-0.08 - 0.12)   | 0.726 | 0.905 | FALSE | FALSE | Converged |
| Kidd | JkA+B+ | ADIPONECTIN      | 0.01 (-0.03 - 0.04)   | 0.662 | 0.523 | FALSE | FALSE | Converged |
| Kidd | JkA-B+ | ADIPONECTIN      | -0.01 (-0.06 - 0.03)  | 0.601 | 0.523 | FALSE | FALSE | Converged |
| Kidd | JkA+B+ | ADIPSIN          | 0.01 (-0.01 - 0.03)   | 0.350 | 0.190 | FALSE | FALSE | Converged |
| Kidd | JkA-B+ | ADIPSIN          | 0.02 (-0.00 - 0.05)   | 0.080 | 0.190 | FALSE | FALSE | Converged |
| Kidd | JkA+B+ | AMYLIN           | -0.04 (-0.09 - 0.01)  | 0.084 | 0.224 | FALSE | FALSE | Converged |
| Kidd | JkA-B+ | AMYLIN           | -0.02 (-0.08 - 0.03)  | 0.442 | 0.224 | FALSE | FALSE | Converged |

|      |        |                  |                       |       |       |       |       |           |
|------|--------|------------------|-----------------------|-------|-------|-------|-------|-----------|
| Kidd | JkA+B+ | BCA 1            | -0.01 (-0.03 - 0.01)  | 0.167 | 0.368 | FALSE | FALSE | Converged |
| Kidd | JkA-B+ | BCA 1            | -0.00 (-0.03 - 0.02)  | 0.646 | 0.368 | FALSE | FALSE | Converged |
| Kidd | JkA+B+ | C PEPTIDE        | -0.01 (-0.05 - 0.03)  | 0.519 | 0.677 | FALSE | FALSE | Converged |
| Kidd | JkA-B+ | C PEPTIDE        | 0.00 (-0.05 - 0.06)   | 0.855 | 0.677 | FALSE | FALSE | Converged |
| Kidd | JkA+B+ | CCL19 MIP3B      | 0.01 (-0.01 - 0.02)   | 0.588 | 0.379 | FALSE | FALSE | Converged |
| Kidd | JkA-B+ | CCL19 MIP3B      | 0.02 (-0.01 - 0.04)   | 0.172 | 0.379 | FALSE | FALSE | Converged |
| Kidd | JkA+B+ | CCL20 MIP3A      | -0.01 (-0.05 - 0.02)  | 0.462 | 0.135 | FALSE | FALSE | Converged |
| Kidd | JkA-B+ | CCL20 MIP3A      | 0.02 (-0.02 - 0.06)   | 0.245 | 0.135 | FALSE | FALSE | Converged |
| Kidd | JkA+B+ | CRP              | -0.01 (-0.05 - 0.03)  | 0.605 | 0.521 | FALSE | FALSE | Converged |
| Kidd | JkA-B+ | CRP              | 0.01 (-0.03 - 0.06)   | 0.586 | 0.521 | FALSE | FALSE | Converged |
| Kidd | JkA+B+ | CTACK            | -0.01 (-0.02 - 0.00)  | 0.260 | 0.528 | FALSE | FALSE | Converged |
| Kidd | JkA-B+ | CTACK            | -0.00 (-0.01 - 0.01)  | 0.586 | 0.528 | FALSE | FALSE | Converged |
| Kidd | JkA+B+ | CXCL11   TAC     | 0.00 (-0.02 - 0.02)   | 0.877 | 0.130 | FALSE | FALSE | Converged |
| Kidd | JkA-B+ | CXCL11   TAC     | 0.02 (-0.00 - 0.05)   | 0.080 | 0.130 | FALSE | FALSE | Converged |
| Kidd | JkA+B+ | CXCL6 GCP2       | -0.00 (-0.02 - 0.01)  | 0.855 | 0.689 | FALSE | FALSE | Converged |
| Kidd | JkA-B+ | CXCL6 GCP2       | -0.01 (-0.03 - 0.01)  | 0.434 | 0.689 | FALSE | FALSE | Converged |
| Kidd | JkA+B+ | CXCL9 MIG        | 0.01 (-0.01 - 0.03)   | 0.541 | 0.021 | FALSE | FALSE | Converged |
| Kidd | JkA-B+ | CXCL9 MIG        | 0.03 (0.01 - 0.06)    | 0.010 | 0.021 | FALSE | FALSE | Converged |
| Kidd | JkA+B+ | EGF              | -0.02 (-0.06 - 0.02)  | 0.266 | 0.153 | FALSE | FALSE | Converged |
| Kidd | JkA-B+ | EGF              | -0.04 (-0.08 - 0.00)  | 0.053 | 0.153 | FALSE | FALSE | Converged |
| Kidd | JkA+B+ | ENA 78           | -0.00 (-0.02 - 0.02)  | 0.762 | 0.934 | FALSE | FALSE | Converged |
| Kidd | JkA-B+ | ENA 78           | -0.00 (-0.02 - 0.02)  | 0.997 | 0.934 | FALSE | FALSE | Converged |
| Kidd | JkA+B+ | EOTAXIN 2        | 0.01 (-0.01 - 0.04)   | 0.276 | 0.443 | FALSE | FALSE | Converged |
| Kidd | JkA-B+ | EOTAXIN 2        | 0.02 (-0.01 - 0.05)   | 0.237 | 0.443 | FALSE | FALSE | Converged |
| Kidd | JkA+B+ | EOTAXIN          | -0.00 (-0.02 - 0.01)  | 0.916 | 0.345 | FALSE | FALSE | Converged |
| Kidd | JkA-B+ | EOTAXIN          | -0.01 (-0.03 - 0.01)  | 0.191 | 0.345 | FALSE | FALSE | Converged |
| Kidd | JkA+B+ | G CSF            | 0.00 (-0.03 - 0.03)   | 0.995 | 0.968 | FALSE | FALSE | Converged |
| Kidd | JkA-B+ | G CSF            | 0.00 (-0.03 - 0.04)   | 0.831 | 0.968 | FALSE | FALSE | Converged |
| Kidd | JkA+B+ | GIP              | -0.00 (-0.07 - 0.06)  | 0.884 | 0.851 | FALSE | FALSE | Converged |
| Kidd | JkA-B+ | GIP              | -0.02 (-0.10 - 0.05)  | 0.587 | 0.851 | FALSE | FALSE | Converged |
| Kidd | JkA+B+ | GRO              | -0.01 (-0.02 - 0.00)  | 0.079 | 0.204 | FALSE | FALSE | Converged |
| Kidd | JkA-B+ | GRO              | -0.01 (-0.02 - 0.01)  | 0.244 | 0.204 | FALSE | FALSE | Converged |
| Kidd | JkA+B+ | IL 13            | -0.34 (-0.68 - -0.01) | 0.045 | 0.109 | FALSE | FALSE | Converged |
| Kidd | JkA-B+ | IL 13            | -0.35 (-0.72 - 0.01)  | 0.058 | 0.109 | FALSE | FALSE | Converged |
| Kidd | JkA+B+ | IL 16            | -0.02 (-0.05 - 0.02)  | 0.402 | 0.594 | FALSE | FALSE | Converged |
| Kidd | JkA-B+ | IL 16            | -0.02 (-0.07 - 0.02)  | 0.345 | 0.594 | FALSE | FALSE | Converged |
| Kidd | JkA+B+ | IL 17            | -0.03 (-0.10 - 0.04)  | 0.361 | 0.628 | FALSE | FALSE | Converged |
| Kidd | JkA-B+ | IL 17            | -0.03 (-0.11 - 0.05)  | 0.441 | 0.628 | FALSE | FALSE | Converged |
| Kidd | JkA+B+ | IL 23            | -0.07 (-0.39 - 0.25)  | 0.676 | 0.916 | FALSE | FALSE | Converged |
| Kidd | JkA-B+ | IL 23            | -0.05 (-0.39 - 0.29)  | 0.781 | 0.916 | FALSE | FALSE | Converged |
| Kidd | JkA+B+ | IL 8             | -0.01 (-0.04 - 0.02)  | 0.525 | 0.773 | FALSE | FALSE | Converged |
| Kidd | JkA-B+ | IL 8             | -0.00 (-0.03 - 0.03)  | 0.965 | 0.773 | FALSE | FALSE | Converged |
| Kidd | JkA+B+ | INSULIN          | -0.04 (-0.09 - 0.01)  | 0.145 | 0.343 | FALSE | FALSE | Converged |
| Kidd | JkA-B+ | INSULIN          | -0.02 (-0.08 - 0.05)  | 0.559 | 0.343 | FALSE | FALSE | Converged |
| Kidd | JkA+B+ | IP 10            | 0.00 (-0.01 - 0.02)   | 0.542 | 0.352 | FALSE | FALSE | Converged |
| Kidd | JkA-B+ | IP 10            | 0.01 (-0.01 - 0.03)   | 0.150 | 0.352 | FALSE | FALSE | Converged |
| Kidd | JkA+B+ | LEPTIN           | -0.02 (-0.07 - 0.03)  | 0.492 | 0.688 | FALSE | FALSE | Converged |
| Kidd | JkA-B+ | LEPTIN           | -0.03 (-0.11 - 0.05)  | 0.435 | 0.688 | FALSE | FALSE | Converged |
| Kidd | JkA+B+ | LIPOCALIN 2 NGAL | -0.00 (-0.04 - 0.04)  | 0.986 | 0.951 | FALSE | FALSE | Converged |
| Kidd | JkA-B+ | LIPOCALIN 2 NGAL | -0.01 (-0.06 - 0.04)  | 0.771 | 0.951 | FALSE | FALSE | Converged |
| Kidd | JkA+B+ | MCP 1            | -0.01 (-0.02 - 0.00)  | 0.067 | 0.112 | FALSE | FALSE | Converged |
| Kidd | JkA-B+ | MCP 1            | -0.00 (-0.02 - 0.01)  | 0.886 | 0.112 | FALSE | FALSE | Converged |
| Kidd | JkA+B+ | MCP 2            | 0.00 (-0.02 - 0.02)   | 0.915 | 0.007 | FALSE | FALSE | Converged |
| Kidd | JkA-B+ | MCP 2            | -0.03 (-0.06 - -0.01) | 0.008 | 0.007 | FALSE | FALSE | Converged |
| Kidd | JkA+B+ | MCP 4            | -0.02 (-0.04 - 0.01)  | 0.264 | 0.389 | FALSE | FALSE | Converged |
| Kidd | JkA-B+ | MCP 4            | -0.02 (-0.05 - 0.01)  | 0.203 | 0.389 | FALSE | FALSE | Converged |
| Kidd | JkA+B+ | MDC              | -0.01 (-0.03 - -0.00) | 0.032 | 0.065 | FALSE | FALSE | Converged |
| Kidd | JkA-B+ | MDC              | -0.00 (-0.02 - 0.01)  | 0.864 | 0.065 | FALSE | FALSE | Converged |
| Kidd | JkA+B+ | MIP 1B           | -0.00 (-0.03 - 0.02)  | 0.698 | 0.822 | FALSE | FALSE | Converged |
| Kidd | JkA-B+ | MIP 1B           | 0.00 (-0.02 - 0.03)   | 0.842 | 0.822 | FALSE | FALSE | Converged |
| Kidd | JkA+B+ | MIP 1D           | -0.01 (-0.03 - 0.01)  | 0.317 | 0.563 | FALSE | FALSE | Converged |
| Kidd | JkA-B+ | MIP 1D           | -0.01 (-0.03 - 0.01)  | 0.384 | 0.563 | FALSE | FALSE | Converged |
| Kidd | JkA+B+ | PAI 1            | 0.02 (-0.01 - 0.04)   | 0.149 | 0.068 | FALSE | FALSE | Converged |
| Kidd | JkA-B+ | PAI 1            | 0.03 (0.00 - 0.05)    | 0.020 | 0.068 | FALSE | FALSE | Converged |
| Kidd | JkA+B+ | PP               | -0.01 (-0.07 - 0.05)  | 0.775 | 0.498 | FALSE | FALSE | Converged |
| Kidd | JkA-B+ | PP               | 0.03 (-0.04 - 0.11)   | 0.408 | 0.498 | FALSE | FALSE | Converged |
| Kidd | JkA+B+ | RESISTIN         | -0.01 (-0.03 - 0.02)  | 0.712 | 0.918 | FALSE | FALSE | Converged |
| Kidd | JkA-B+ | RESISTIN         | -0.00 (-0.03 - 0.03)  | 0.965 | 0.918 | FALSE | FALSE | Converged |
| Kidd | JkA+B+ | SAA              | 0.00 (-0.04 - 0.04)   | 0.950 | 0.984 | FALSE | FALSE | Converged |
| Kidd | JkA-B+ | SAA              | -0.00 (-0.05 - 0.04)  | 0.913 | 0.984 | FALSE | FALSE | Converged |
| Kidd | JkA+B+ | SAP              | -0.01 (-0.02 - 0.01)  | 0.413 | 0.568 | FALSE | FALSE | Converged |
| Kidd | JkA-B+ | SAP              | 0.00 (-0.01 - 0.02)   | 0.837 | 0.568 | FALSE | FALSE | Converged |
| Kidd | JkA+B+ | SDF 1A B         | -0.01 (-0.02 - 0.01)  | 0.365 | 0.090 | FALSE | FALSE | Converged |

|      |        |              |                       |       |       |       |       |           |
|------|--------|--------------|-----------------------|-------|-------|-------|-------|-----------|
| Kidd | JkA-B+ | SDF 1A B     | -0.02 (-0.03 - -0.00) | 0.029 | 0.090 | FALSE | FALSE | Converged |
| Kidd | JkA+B+ | SEGFR        | 0.00 (-0.01 - 0.01)   | 0.885 | 0.665 | FALSE | FALSE | Converged |
| Kidd | JkA-B+ | SEGFR        | 0.00 (-0.00 - 0.01)   | 0.404 | 0.665 | FALSE | FALSE | Converged |
| Kidd | JkA+B+ | SGP130       | -0.00 (-0.01 - 0.01)  | 0.778 | 0.336 | FALSE | FALSE | Converged |
| Kidd | JkA-B+ | SGP130       | 0.01 (-0.00 - 0.02)   | 0.291 | 0.336 | FALSE | FALSE | Converged |
| Kidd | JkA+B+ | SIL4R        | -0.00 (-0.02 - 0.01)  | 0.548 | 0.409 | FALSE | FALSE | Converged |
| Kidd | JkA-B+ | SIL4R        | 0.01 (-0.01 - 0.02)   | 0.448 | 0.409 | FALSE | FALSE | Converged |
| Kidd | JkA+B+ | SIL6R        | 0.00 (-0.01 - 0.01)   | 0.836 | 0.641 | FALSE | FALSE | Converged |
| Kidd | JkA-B+ | SIL6R        | 0.01 (-0.01 - 0.02)   | 0.377 | 0.641 | FALSE | FALSE | Converged |
| Kidd | JkA+B+ | SILRII       | -0.01 (-0.02 - 0.01)  | 0.280 | 0.059 | FALSE | FALSE | Converged |
| Kidd | JkA-B+ | SILRII       | 0.01 (-0.01 - 0.02)   | 0.261 | 0.059 | FALSE | FALSE | Converged |
| Kidd | JkA+B+ | STNFRI       | -0.01 (-0.02 - -0.00) | 0.036 | 0.110 | FALSE | FALSE | Converged |
| Kidd | JkA-B+ | STNFRI       | -0.01 (-0.02 - 0.00)  | 0.213 | 0.110 | FALSE | FALSE | Converged |
| Kidd | JkA+B+ | STNFRII      | -0.01 (-0.02 - 0.00)  | 0.083 | 0.096 | FALSE | FALSE | Converged |
| Kidd | JkA-B+ | STNFRII      | 0.00 (-0.01 - 0.01)   | 0.980 | 0.096 | FALSE | FALSE | Converged |
| Kidd | JkA+B+ | SVEGFR2      | 0.00 (-0.01 - 0.01)   | 0.644 | 0.112 | FALSE | FALSE | Converged |
| Kidd | JkA-B+ | SVEGFR2      | 0.01 (0.00 - 0.02)    | 0.046 | 0.112 | FALSE | FALSE | Converged |
| Kidd | JkA+B+ | SVEGFR3      | -0.03 (-0.06 - -0.01) | 0.009 | 0.013 | FALSE | FALSE | Converged |
| Kidd | JkA-B+ | SVEGFR3      | -0.00 (-0.03 - 0.03)  | 0.804 | 0.013 | FALSE | FALSE | Converged |
| Kidd | JkA+B+ | TARC         | -0.01 (-0.03 - 0.01)  | 0.449 | 0.555 | FALSE | FALSE | Converged |
| Kidd | JkA-B+ | TARC         | 0.00 (-0.02 - 0.03)   | 0.815 | 0.555 | FALSE | FALSE | Converged |
| Kidd | JkA+B+ | TGF A        | 0.03 (-0.01 - 0.06)   | 0.178 | 0.269 | FALSE | FALSE | Converged |
| Kidd | JkA-B+ | TGF A        | -0.00 (-0.04 - 0.04)  | 0.992 | 0.269 | FALSE | FALSE | Converged |
| Kidd | JkA+B+ | TGF B1       | -0.04 (-0.08 - 0.01)  | 0.088 | 0.006 | FALSE | FALSE | Converged |
| Kidd | JkA-B+ | TGF B1       | 0.03 (-0.02 - 0.07)   | 0.248 | 0.006 | FALSE | FALSE | Converged |
| Kidd | JkA+B+ | TNFA         | 0.00 (-0.02 - 0.02)   | 0.892 | 0.901 | FALSE | FALSE | Converged |
| Kidd | JkA-B+ | TNFA         | 0.00 (-0.02 - 0.02)   | 0.654 | 0.901 | FALSE | FALSE | Converged |
| Kidd | JkA+B+ | TPO          | 0.01 (-0.04 - 0.07)   | 0.634 | 0.503 | FALSE | FALSE | Converged |
| Kidd | JkA-B+ | TPO          | -0.02 (-0.08 - 0.04)  | 0.532 | 0.503 | FALSE | FALSE | Converged |
| Kidd | JkA+B+ | TRAIL        | -0.00 (-0.02 - 0.02)  | 0.797 | 0.420 | FALSE | FALSE | Converged |
| Kidd | JkA-B+ | TRAIL        | 0.01 (-0.01 - 0.03)   | 0.361 | 0.420 | FALSE | FALSE | Converged |
| Kidd | JkA+B+ | VEGF         | -0.01 (-0.06 - 0.04)  | 0.691 | 0.915 | FALSE | FALSE | Converged |
| Kidd | JkA-B+ | VEGF         | -0.00 (-0.06 - 0.05)  | 0.922 | 0.915 | FALSE | FALSE | Converged |
| Kidd | JkA+B+ | X6CKINE      | -0.05 (-0.08 - -0.02) | 0.001 | 0.003 | FALSE | FALSE | Converged |
| Kidd | JkA-B+ | X6CKINE      | -0.02 (-0.05 - 0.01)  | 0.280 | 0.003 | FALSE | FALSE | Converged |
| Aub  | AuA-B+ | ADIPONECTIN  | -0.01 (-0.06 - 0.05)  | 0.853 | 0.473 | FALSE | FALSE | Converged |
| Aub  | AuA+B+ | ADIPONECTIN  | -0.02 (-0.05 - 0.01)  | 0.222 | 0.473 | FALSE | FALSE | Converged |
| Aub  | AuA-B+ | ADIPSIN      | -0.01 (-0.04 - 0.02)  | 0.462 | 0.757 | FALSE | FALSE | Converged |
| Aub  | AuA+B+ | ADIPSIN      | -0.00 (-0.02 - 0.02)  | 0.753 | 0.757 | FALSE | FALSE | Converged |
| Aub  | AuA-B+ | AMYLIN       | 0.01 (-0.07 - 0.09)   | 0.863 | 0.563 | FALSE | FALSE | Converged |
| Aub  | AuA+B+ | AMYLIN       | -0.02 (-0.07 - 0.02)  | 0.324 | 0.563 | FALSE | FALSE | Converged |
| Aub  | AuA-B+ | BCA 1        | 0.01 (-0.02 - 0.04)   | 0.511 | 0.425 | FALSE | FALSE | Converged |
| Aub  | AuA+B+ | BCA 1        | 0.01 (-0.01 - 0.03)   | 0.210 | 0.425 | FALSE | FALSE | Converged |
| Aub  | AuA-B+ | C PEPTIDE    | -0.02 (-0.10 - 0.07)  | 0.658 | 0.774 | FALSE | FALSE | Converged |
| Aub  | AuA+B+ | C PEPTIDE    | 0.01 (-0.03 - 0.05)   | 0.641 | 0.774 | FALSE | FALSE | Converged |
| Aub  | AuA-B+ | CCL19 MIP3B  | 0.00 (-0.03 - 0.04)   | 0.775 | 0.447 | FALSE | FALSE | Converged |
| Aub  | AuA+B+ | CCL19 MIP3B  | 0.01 (-0.01 - 0.03)   | 0.204 | 0.447 | FALSE | FALSE | Converged |
| Aub  | AuA-B+ | CCL20 MIP3A  | 0.01 (-0.05 - 0.07)   | 0.811 | 0.251 | FALSE | FALSE | Converged |
| Aub  | AuA+B+ | CCL20 MIP3A  | -0.02 (-0.05 - 0.01)  | 0.123 | 0.251 | FALSE | FALSE | Converged |
| Aub  | AuA-B+ | CRP          | 0.06 (0.00 - 0.12)    | 0.036 | 0.109 | FALSE | FALSE | Converged |
| Aub  | AuA+B+ | CRP          | 0.01 (-0.03 - 0.04)   | 0.726 | 0.109 | FALSE | FALSE | Converged |
| Aub  | AuA-B+ | CTACK        | -0.00 (-0.02 - 0.01)  | 0.677 | 0.439 | FALSE | FALSE | Converged |
| Aub  | AuA+B+ | CTACK        | 0.01 (-0.00 - 0.02)   | 0.282 | 0.439 | FALSE | FALSE | Converged |
| Aub  | AuA-B+ | CXCL11   TAC | -0.03 (-0.07 - 0.01)  | 0.208 | 0.283 | FALSE | FALSE | Converged |
| Aub  | AuA+B+ | CXCL11   TAC | 0.01 (-0.01 - 0.03)   | 0.484 | 0.283 | FALSE | FALSE | Converged |
| Aub  | AuA-B+ | CXCL6 GCP2   | 0.01 (-0.02 - 0.04)   | 0.480 | 0.125 | FALSE | FALSE | Converged |
| Aub  | AuA+B+ | CXCL6 GCP2   | 0.01 (0.00 - 0.03)    | 0.043 | 0.125 | FALSE | FALSE | Converged |
| Aub  | AuA-B+ | CXCL9 MIG    | -0.02 (-0.05 - 0.02)  | 0.323 | 0.516 | FALSE | FALSE | Converged |
| Aub  | AuA+B+ | CXCL9 MIG    | -0.01 (-0.03 - 0.01)  | 0.410 | 0.516 | FALSE | FALSE | Converged |
| Aub  | AuA-B+ | EGF          | -0.01 (-0.08 - 0.05)  | 0.684 | 0.024 | FALSE | FALSE | Converged |
| Aub  | AuA+B+ | EGF          | 0.04 (0.01 - 0.08)    | 0.011 | 0.024 | FALSE | FALSE | Converged |
| Aub  | AuA-B+ | ENA 78       | 0.01 (-0.02 - 0.04)   | 0.566 | 0.767 | FALSE | FALSE | Converged |
| Aub  | AuA+B+ | ENA 78       | 0.00 (-0.01 - 0.02)   | 0.575 | 0.767 | FALSE | FALSE | Converged |
| Aub  | AuA-B+ | EOTAXIN 2    | 0.02 (-0.02 - 0.06)   | 0.307 | 0.508 | FALSE | FALSE | Converged |
| Aub  | AuA+B+ | EOTAXIN 2    | -0.00 (-0.03 - 0.02)  | 0.752 | 0.508 | FALSE | FALSE | Converged |
| Aub  | AuA-B+ | EOTAXIN      | 0.02 (-0.00 - 0.05)   | 0.098 | 0.254 | FALSE | FALSE | Converged |
| Aub  | AuA+B+ | EOTAXIN      | 0.00 (-0.01 - 0.02)   | 0.697 | 0.254 | FALSE | FALSE | Converged |
| Aub  | AuA-B+ | G CSF        | -0.03 (-0.08 - 0.02)  | 0.203 | 0.389 | FALSE | FALSE | Converged |
| Aub  | AuA+B+ | G CSF        | -0.01 (-0.04 - 0.01)  | 0.405 | 0.389 | FALSE | FALSE | Converged |
| Aub  | AuA-B+ | GIP          | 0.02 (-0.09 - 0.13)   | 0.696 | 0.824 | FALSE | FALSE | Converged |
| Aub  | AuA+B+ | GIP          | -0.01 (-0.07 - 0.05)  | 0.723 | 0.824 | FALSE | FALSE | Converged |
| Aub  | AuA-B+ | GRO          | 0.01 (-0.01 - 0.04)   | 0.182 | 0.381 | FALSE | FALSE | Converged |
| Aub  | AuA+B+ | GRO          | 0.00 (-0.01 - 0.02)   | 0.461 | 0.381 | FALSE | FALSE | Converged |

|     |        |                  |                       |       |       |       |       |           |
|-----|--------|------------------|-----------------------|-------|-------|-------|-------|-----------|
| Aub | AuA-B+ | IL 13            | -0.21 (-0.90 - 0.47)  | 0.541 | 0.566 | FALSE | FALSE | Converged |
| Aub | AuA+B+ | IL 13            | 0.09 (-0.16 - 0.35)   | 0.470 | 0.566 | FALSE | FALSE | Converged |
| Aub | AuA-B+ | IL 16            | -0.02 (-0.08 - 0.04)  | 0.595 | 0.818 | FALSE | FALSE | Converged |
| Aub | AuA+B+ | IL 16            | 0.00 (-0.03 - 0.04)   | 0.840 | 0.818 | FALSE | FALSE | Converged |
| Aub | AuA-B+ | IL 17            | 0.07 (-0.05 - 0.18)   | 0.263 | 0.070 | FALSE | FALSE | Converged |
| Aub | AuA+B+ | IL 17            | 0.07 (0.01 - 0.13)    | 0.026 | 0.070 | FALSE | FALSE | Converged |
| Aub | AuA-B+ | IL 23            | 0.10 (-0.28 - 0.47)   | 0.609 | 0.095 | FALSE | FALSE | Converged |
| Aub | AuA+B+ | IL 23            | 0.26 (0.02 - 0.50)    | 0.036 | 0.095 | FALSE | FALSE | Converged |
| Aub | AuA-B+ | IL 8             | -0.00 (-0.05 - 0.05)  | 0.880 | 0.494 | FALSE | FALSE | Converged |
| Aub | AuA+B+ | IL 8             | 0.02 (-0.01 - 0.04)   | 0.267 | 0.494 | FALSE | FALSE | Converged |
| Aub | AuA-B+ | INSULIN          | -0.00 (-0.09 - 0.09)  | 0.976 | 0.877 | FALSE | FALSE | Converged |
| Aub | AuA+B+ | INSULIN          | -0.01 (-0.06 - 0.04)  | 0.615 | 0.877 | FALSE | FALSE | Converged |
| Aub | AuA-B+ | IP 10            | -0.02 (-0.04 - 0.01)  | 0.200 | 0.387 | FALSE | FALSE | Converged |
| Aub | AuA+B+ | IP 10            | -0.01 (-0.02 - 0.01)  | 0.422 | 0.387 | FALSE | FALSE | Converged |
| Aub | AuA-B+ | LEPTIN           | -0.06 (-0.16 - 0.05)  | 0.299 | 0.317 | FALSE | FALSE | Converged |
| Aub | AuA+B+ | LEPTIN           | 0.02 (-0.03 - 0.07)   | 0.403 | 0.317 | FALSE | FALSE | Converged |
| Aub | AuA-B+ | LIPOCALIN 2 NGAL | -0.03 (-0.12 - 0.07)  | 0.593 | 0.773 | FALSE | FALSE | Converged |
| Aub | AuA+B+ | LIPOCALIN 2 NGAL | 0.01 (-0.03 - 0.04)   | 0.691 | 0.773 | FALSE | FALSE | Converged |
| Aub | AuA-B+ | MCP 1            | 0.00 (-0.01 - 0.03)   | 0.688 | 0.794 | FALSE | FALSE | Converged |
| Aub | AuA+B+ | MCP 1            | 0.00 (-0.01 - 0.01)   | 0.527 | 0.794 | FALSE | FALSE | Converged |
| Aub | AuA-B+ | MCP 2            | 0.01 (-0.03 - 0.04)   | 0.592 | 0.797 | FALSE | FALSE | Converged |
| Aub | AuA+B+ | MCP 2            | 0.00 (-0.01 - 0.02)   | 0.599 | 0.797 | FALSE | FALSE | Converged |
| Aub | AuA-B+ | MCP 4            | -0.01 (-0.06 - 0.04)  | 0.599 | 0.850 | FALSE | FALSE | Converged |
| Aub | AuA+B+ | MCP 4            | -0.00 (-0.03 - 0.02)  | 0.744 | 0.850 | FALSE | FALSE | Converged |
| Aub | AuA-B+ | MDC              | 0.01 (-0.01 - 0.03)   | 0.590 | 0.864 | FALSE | FALSE | Converged |
| Aub | AuA+B+ | MDC              | 0.00 (-0.01 - 0.01)   | 0.857 | 0.864 | FALSE | FALSE | Converged |
| Aub | AuA-B+ | MIP 1B           | -0.01 (-0.05 - 0.03)  | 0.653 | 0.758 | FALSE | FALSE | Converged |
| Aub | AuA+B+ | MIP 1B           | -0.01 (-0.03 - 0.01)  | 0.501 | 0.758 | FALSE | FALSE | Converged |
| Aub | AuA-B+ | MIP 1D           | -0.02 (-0.06 - 0.01)  | 0.202 | 0.395 | FALSE | FALSE | Converged |
| Aub | AuA+B+ | MIP 1D           | -0.01 (-0.02 - 0.01)  | 0.476 | 0.395 | FALSE | FALSE | Converged |
| Aub | AuA-B+ | PAI 1            | -0.01 (-0.05 - 0.02)  | 0.495 | 0.634 | FALSE | FALSE | Converged |
| Aub | AuA+B+ | PAI 1            | 0.00 (-0.01 - 0.02)   | 0.608 | 0.634 | FALSE | FALSE | Converged |
| Aub | AuA-B+ | PP               | 0.04 (-0.07 - 0.15)   | 0.450 | 0.151 | FALSE | FALSE | Converged |
| Aub | AuA+B+ | PP               | 0.06 (-0.00 - 0.11)   | 0.053 | 0.151 | FALSE | FALSE | Converged |
| Aub | AuA-B+ | RESISTIN         | -0.01 (-0.06 - 0.04)  | 0.689 | 0.258 | FALSE | FALSE | Converged |
| Aub | AuA+B+ | RESISTIN         | 0.02 (-0.01 - 0.04)   | 0.138 | 0.258 | FALSE | FALSE | Converged |
| Aub | AuA-B+ | SAA              | 0.02 (-0.05 - 0.08)   | 0.556 | 0.397 | FALSE | FALSE | Converged |
| Aub | AuA+B+ | SAA              | -0.02 (-0.05 - 0.02)  | 0.291 | 0.397 | FALSE | FALSE | Converged |
| Aub | AuA-B+ | SAP              | 0.01 (-0.01 - 0.03)   | 0.325 | 0.396 | FALSE | FALSE | Converged |
| Aub | AuA+B+ | SAP              | -0.00 (-0.02 - 0.01)  | 0.532 | 0.396 | FALSE | FALSE | Converged |
| Aub | AuA-B+ | SDF 1A B         | -0.00 (-0.03 - 0.02)  | 0.843 | 0.980 | FALSE | FALSE | Converged |
| Aub | AuA+B+ | SDF 1A B         | -0.00 (-0.01 - 0.01)  | 0.989 | 0.980 | FALSE | FALSE | Converged |
| Aub | AuA-B+ | SEGFR            | -0.00 (-0.01 - 0.01)  | 0.950 | 0.898 | FALSE | FALSE | Converged |
| Aub | AuA+B+ | SEGFR            | 0.00 (-0.01 - 0.01)   | 0.662 | 0.898 | FALSE | FALSE | Converged |
| Aub | AuA-B+ | SGP130           | -0.00 (-0.02 - 0.01)  | 0.520 | 0.788 | FALSE | FALSE | Converged |
| Aub | AuA+B+ | SGP130           | 0.00 (-0.01 - 0.01)   | 0.927 | 0.788 | FALSE | FALSE | Converged |
| Aub | AuA-B+ | SIL4R            | -0.02 (-0.05 - -0.00) | 0.033 | 0.048 | FALSE | FALSE | Converged |
| Aub | AuA+B+ | SIL4R            | 0.00 (-0.01 - 0.02)   | 0.479 | 0.048 | FALSE | FALSE | Converged |
| Aub | AuA-B+ | SIL6R            | -0.00 (-0.02 - 0.02)  | 0.998 | 0.945 | FALSE | FALSE | Converged |
| Aub | AuA+B+ | SIL6R            | -0.00 (-0.01 - 0.01)  | 0.742 | 0.945 | FALSE | FALSE | Converged |
| Aub | AuA-B+ | SILRII           | -0.02 (-0.04 - 0.01)  | 0.179 | 0.404 | FALSE | FALSE | Converged |
| Aub | AuA+B+ | SILRII           | -0.00 (-0.01 - 0.01)  | 0.812 | 0.404 | FALSE | FALSE | Converged |
| Aub | AuA-B+ | STNFRI           | 0.01 (-0.01 - 0.03)   | 0.527 | 0.819 | FALSE | FALSE | Converged |
| Aub | AuA+B+ | STNFRI           | 0.00 (-0.01 - 0.01)   | 0.879 | 0.819 | FALSE | FALSE | Converged |
| Aub | AuA-B+ | STNFR II         | 0.00 (-0.02 - 0.02)   | 0.884 | 0.672 | FALSE | FALSE | Converged |
| Aub | AuA+B+ | STNFR II         | 0.00 (-0.01 - 0.01)   | 0.373 | 0.672 | FALSE | FALSE | Converged |
| Aub | AuA-B+ | SVEGFR2          | -0.01 (-0.02 - 0.01)  | 0.362 | 0.290 | FALSE | FALSE | Converged |
| Aub | AuA+B+ | SVEGFR2          | -0.01 (-0.02 - 0.00)  | 0.143 | 0.290 | FALSE | FALSE | Converged |
| Aub | AuA-B+ | SVEGFR3          | -0.00 (-0.04 - 0.04)  | 0.964 | 0.483 | FALSE | FALSE | Converged |
| Aub | AuA+B+ | SVEGFR3          | -0.01 (-0.04 - 0.01)  | 0.237 | 0.483 | FALSE | FALSE | Converged |
| Aub | AuA-B+ | TARC             | 0.01 (-0.02 - 0.05)   | 0.447 | 0.608 | FALSE | FALSE | Converged |
| Aub | AuA+B+ | TARC             | 0.01 (-0.01 - 0.03)   | 0.418 | 0.608 | FALSE | FALSE | Converged |
| Aub | AuA-B+ | TGF A            | 0.02 (-0.04 - 0.09)   | 0.450 | 0.270 | FALSE | FALSE | Converged |
| Aub | AuA+B+ | TGF A            | 0.03 (-0.01 - 0.06)   | 0.115 | 0.270 | FALSE | FALSE | Converged |
| Aub | AuA-B+ | TGF B1           | -0.00 (-0.08 - 0.08)  | 0.994 | 0.650 | FALSE | FALSE | Converged |
| Aub | AuA+B+ | TGF B1           | -0.02 (-0.05 - 0.02)  | 0.363 | 0.650 | FALSE | FALSE | Converged |
| Aub | AuA-B+ | TNFA             | 0.01 (-0.02 - 0.04)   | 0.450 | 0.728 | FALSE | FALSE | Converged |
| Aub | AuA+B+ | TNFA             | -0.00 (-0.02 - 0.02)  | 0.962 | 0.728 | FALSE | FALSE | Converged |
| Aub | AuA-B+ | TPO              | -0.03 (-0.12 - 0.06)  | 0.518 | 0.080 | FALSE | FALSE | Converged |
| Aub | AuA+B+ | TPO              | 0.05 (-0.00 - 0.10)   | 0.055 | 0.080 | FALSE | FALSE | Converged |
| Aub | AuA-B+ | TRAIL            | -0.03 (-0.06 - 0.01)  | 0.142 | 0.293 | FALSE | FALSE | Converged |
| Aub | AuA+B+ | TRAIL            | -0.01 (-0.02 - 0.01)  | 0.396 | 0.293 | FALSE | FALSE | Converged |
| Aub | AuA-B+ | VEGF             | 0.05 (-0.03 - 0.14)   | 0.245 | 0.327 | FALSE | FALSE | Converged |



|       |        |                  |                       |       |       |       |       |           |
|-------|--------|------------------|-----------------------|-------|-------|-------|-------|-----------|
| Aub   | AuA+B+ | VEGF             | 0.03 (-0.02 - 0.07)   | 0.238 | 0.327 | FALSE | FALSE | Converged |
| Aub   | AuA+B+ | X6CKINE          | 0.01 (-0.04 - 0.05)   | 0.842 | 0.778 | FALSE | FALSE | Converged |
| Aub   | AuA+B+ | X6CKINE          | -0.01 (-0.03 - 0.02)  | 0.535 | 0.778 | FALSE | FALSE | Converged |
| Duffy | FYA+B+ | ADIPONECTIN      | -0.03 (-0.07 - 0.01)  | 0.201 | 0.320 | FALSE | FALSE | Converged |
| Duffy | FYA+B+ | ADIPONECTIN      | -0.01 (-0.05 - 0.04)  | 0.782 | 0.320 | FALSE | FALSE | Converged |
| Duffy | FYA+B+ | ADIPSIN          | -0.01 (-0.03 - 0.01)  | 0.360 | 0.446 | FALSE | FALSE | Converged |
| Duffy | FYA+B+ | ADIPSIN          | 0.00 (-0.02 - 0.02)   | 0.982 | 0.446 | FALSE | FALSE | Converged |
| Duffy | FYA+B+ | AMYLIN           | -0.04 (-0.10 - 0.01)  | 0.127 | 0.276 | FALSE | FALSE | Converged |
| Duffy | FYA+B+ | AMYLIN           | -0.02 (-0.08 - 0.04)  | 0.534 | 0.276 | FALSE | FALSE | Converged |
| Duffy | FYA+B+ | BCA 1            | -0.01 (-0.03 - 0.01)  | 0.434 | 0.543 | FALSE | FALSE | Converged |
| Duffy | FYA+B+ | BCA 1            | -0.01 (-0.03 - 0.01)  | 0.271 | 0.543 | FALSE | FALSE | Converged |
| Duffy | FYA+B+ | C PEPTIDE        | -0.01 (-0.06 - 0.04)  | 0.776 | 0.802 | FALSE | FALSE | Converged |
| Duffy | FYA+B+ | C PEPTIDE        | 0.01 (-0.05 - 0.06)   | 0.793 | 0.802 | FALSE | FALSE | Converged |
| Duffy | FYA+B+ | CCL19 MIP3B      | -0.01 (-0.03 - 0.01)  | 0.383 | 0.351 | FALSE | FALSE | Converged |
| Duffy | FYA+B+ | CCL19 MIP3B      | -0.02 (-0.04 - 0.01)  | 0.149 | 0.351 | FALSE | FALSE | Converged |
| Duffy | FYA+B+ | CCL20 MIP3A      | -0.02 (-0.06 - 0.02)  | 0.375 | 0.661 | FALSE | FALSE | Converged |
| Duffy | FYA+B+ | CCL20 MIP3A      | -0.02 (-0.06 - 0.03)  | 0.463 | 0.661 | FALSE | FALSE | Converged |
| Duffy | FYA+B+ | CRP              | -0.01 (-0.05 - 0.03)  | 0.608 | 0.874 | FALSE | FALSE | Converged |
| Duffy | FYA+B+ | CRP              | -0.01 (-0.05 - 0.04)  | 0.707 | 0.874 | FALSE | FALSE | Converged |
| Duffy | FYA+B+ | CTACK            | -0.01 (-0.02 - 0.00)  | 0.143 | 0.235 | FALSE | FALSE | Converged |
| Duffy | FYA+B+ | CTACK            | -0.00 (-0.01 - 0.01)  | 0.864 | 0.235 | FALSE | FALSE | Converged |
| Duffy | FYA+B+ | CXCL11   TAC     | 0.01 (-0.01 - 0.04)   | 0.278 | 0.007 | FALSE | FALSE | Converged |
| Duffy | FYA+B+ | CXCL11   TAC     | 0.04 (-0.01 - 0.07)   | 0.003 | 0.007 | FALSE | FALSE | Converged |
| Duffy | FYA+B+ | CXCL6 GCP2       | 0.04 (0.02 - 0.06)    | 0.000 | 0.000 | TRUE  | FALSE | Converged |
| Duffy | FYA+B+ | CXCL6 GCP2       | 0.09 (0.07 - 0.11)    | 0.000 | 0.000 | TRUE  | FALSE | Converged |
| Duffy | FYA+B+ | CXCL9 MIG        | 0.00 (-0.02 - 0.03)   | 0.800 | 0.859 | FALSE | FALSE | Converged |
| Duffy | FYA+B+ | CXCL9 MIG        | -0.00 (-0.03 - 0.02)  | 0.826 | 0.859 | FALSE | FALSE | Converged |
| Duffy | FYA+B+ | EGF              | -0.03 (-0.07 - 0.01)  | 0.184 | 0.373 | FALSE | FALSE | Converged |
| Duffy | FYA+B+ | EGF              | -0.03 (-0.07 - 0.02)  | 0.235 | 0.373 | FALSE | FALSE | Converged |
| Duffy | FYA+B+ | ENA 78           | 0.02 (-0.00 - 0.04)   | 0.054 | 0.000 | TRUE  | FALSE | Converged |
| Duffy | FYA+B+ | ENA 78           | 0.10 (0.08 - 0.13)    | 0.000 | 0.000 | TRUE  | FALSE | Converged |
| Duffy | FYA+B+ | EOTAXIN 2        | -0.01 (-0.04 - 0.02)  | 0.555 | 0.029 | FALSE | FALSE | Converged |
| Duffy | FYA+B+ | EOTAXIN 2        | 0.02 (-0.00 - 0.05)   | 0.104 | 0.029 | FALSE | FALSE | Converged |
| Duffy | FYA+B+ | EOTAXIN          | 0.08 (0.06 - 0.10)    | 0.000 | 0.000 | TRUE  | FALSE | Converged |
| Duffy | FYA+B+ | EOTAXIN          | 0.17 (0.15 - 0.19)    | 0.000 | 0.000 | TRUE  | FALSE | Converged |
| Duffy | FYA+B+ | G CSF            | 0.01 (-0.02 - 0.04)   | 0.544 | 0.158 | FALSE | FALSE | Converged |
| Duffy | FYA+B+ | G CSF            | -0.02 (-0.05 - 0.02)  | 0.295 | 0.158 | FALSE | FALSE | Converged |
| Duffy | FYA+B+ | GIP              | -0.02 (-0.09 - 0.06)  | 0.639 | 0.791 | FALSE | FALSE | Converged |
| Duffy | FYA+B+ | GIP              | 0.00 (-0.08 - 0.08)   | 0.961 | 0.791 | FALSE | FALSE | Converged |
| Duffy | FYA+B+ | GRO              | 0.03 (0.01 - 0.04)    | 0.000 | 0.000 | TRUE  | FALSE | Converged |
| Duffy | FYA+B+ | GRO              | 0.09 (0.07 - 0.10)    | 0.000 | 0.000 | TRUE  | FALSE | Converged |
| Duffy | FYA+B+ | IL 13            | -0.12 (-0.50 - 0.26)  | 0.530 | 0.157 | FALSE | FALSE | Converged |
| Duffy | FYA+B+ | IL 13            | 0.17 (-0.25 - 0.60)   | 0.423 | 0.157 | FALSE | FALSE | Converged |
| Duffy | FYA+B+ | IL 16            | 0.01 (-0.04 - 0.05)   | 0.793 | 0.868 | FALSE | FALSE | Converged |
| Duffy | FYA+B+ | IL 16            | -0.00 (-0.05 - 0.04)  | 0.841 | 0.868 | FALSE | FALSE | Converged |
| Duffy | FYA+B+ | IL 17            | -0.11 (-0.19 - -0.03) | 0.009 | 0.017 | FALSE | FALSE | Converged |
| Duffy | FYA+B+ | IL 17            | -0.12 (-0.21 - -0.03) | 0.008 | 0.017 | FALSE | FALSE | Converged |
| Duffy | FYA+B+ | IL 23            | 0.08 (-0.28 - 0.45)   | 0.650 | 0.879 | FALSE | FALSE | Converged |
| Duffy | FYA+B+ | IL 23            | 0.10 (-0.30 - 0.49)   | 0.632 | 0.879 | FALSE | FALSE | Converged |
| Duffy | FYA+B+ | IL 8             | 0.04 (0.01 - 0.08)    | 0.012 | 0.000 | FALSE | FALSE | Converged |
| Duffy | FYA+B+ | IL 8             | 0.08 (0.04 - 0.11)    | 0.000 | 0.000 | FALSE | FALSE | Converged |
| Duffy | FYA+B+ | INSULIN          | -0.04 (-0.10 - 0.02)  | 0.207 | 0.451 | FALSE | FALSE | Converged |
| Duffy | FYA+B+ | INSULIN          | -0.03 (-0.10 - 0.04)  | 0.423 | 0.451 | FALSE | FALSE | Converged |
| Duffy | FYA+B+ | IP 10            | -0.01 (-0.03 - 0.01)  | 0.329 | 0.621 | FALSE | FALSE | Converged |
| Duffy | FYA+B+ | IP 10            | -0.01 (-0.03 - 0.01)  | 0.545 | 0.621 | FALSE | FALSE | Converged |
| Duffy | FYA+B+ | LEPTIN           | -0.05 (-0.12 - 0.02)  | 0.153 | 0.254 | FALSE | FALSE | Converged |
| Duffy | FYA+B+ | LEPTIN           | -0.01 (-0.08 - 0.06)  | 0.774 | 0.254 | FALSE | FALSE | Converged |
| Duffy | FYA+B+ | LIPOCALIN 2 NGAL | -0.04 (-0.09 - 0.01)  | 0.090 | 0.053 | FALSE | FALSE | Converged |
| Duffy | FYA+B+ | LIPOCALIN 2 NGAL | 0.01 (-0.03 - 0.05)   | 0.664 | 0.053 | FALSE | FALSE | Converged |
| Duffy | FYA+B+ | MCP 1            | 0.08 (0.07 - 0.10)    | 0.000 | 0.000 | TRUE  | FALSE | Converged |
| Duffy | FYA+B+ | MCP 1            | 0.17 (0.15 - 0.18)    | 0.000 | 0.000 | TRUE  | FALSE | Converged |
| Duffy | FYA+B+ | MCP 2            | -0.04 (-0.06 - -0.01) | 0.001 | 0.001 | FALSE | FALSE | Converged |
| Duffy | FYA+B+ | MCP 2            | -0.04 (-0.07 - -0.02) | 0.001 | 0.001 | FALSE | FALSE | Converged |
| Duffy | FYA+B+ | MCP 4            | 0.09 (0.06 - 0.12)    | 0.000 | 0.000 | TRUE  | FALSE | Converged |
| Duffy | FYA+B+ | MCP 4            | 0.21 (0.18 - 0.24)    | 0.000 | 0.000 | TRUE  | FALSE | Converged |
| Duffy | FYA+B+ | MDC              | 0.01 (-0.00 - 0.02)   | 0.143 | 0.212 | FALSE | FALSE | Converged |
| Duffy | FYA+B+ | MDC              | 0.00 (-0.02 - 0.02)   | 0.922 | 0.212 | FALSE | FALSE | Converged |
| Duffy | FYA+B+ | MIP 1B           | 0.02 (-0.01 - 0.04)   | 0.204 | 0.124 | FALSE | FALSE | Converged |
| Duffy | FYA+B+ | MIP 1B           | 0.03 (0.00 - 0.05)    | 0.041 | 0.124 | FALSE | FALSE | Converged |
| Duffy | FYA+B+ | MIP 1D           | 0.00 (-0.02 - 0.02)   | 0.720 | 0.205 | FALSE | FALSE | Converged |
| Duffy | FYA+B+ | MIP 1D           | 0.02 (-0.00 - 0.04)   | 0.120 | 0.205 | FALSE | FALSE | Converged |
| Duffy | FYA+B+ | PAI 1            | -0.01 (-0.03 - 0.01)  | 0.317 | 0.483 | FALSE | FALSE | Converged |
| Duffy | FYA+B+ | PAI 1            | -0.00 (-0.02 - 0.02)  | 0.937 | 0.483 | FALSE | FALSE | Converged |

|       |        |                  |                       |       |       |       |       |           |
|-------|--------|------------------|-----------------------|-------|-------|-------|-------|-----------|
| Duffy | FYA+B+ | PP               | 0.02 (-0.06 - 0.10)   | 0.659 | 0.896 | FALSE | FALSE | Converged |
| Duffy | FYA-B+ | PP               | 0.02 (-0.07 - 0.10)   | 0.677 | 0.896 | FALSE | FALSE | Converged |
| Duffy | FYA+B+ | RESISTIN         | -0.01 (-0.04 - 0.03)  | 0.719 | 0.039 | FALSE | FALSE | Converged |
| Duffy | FYA-B+ | RESISTIN         | 0.03 (-0.01 - 0.06)   | 0.099 | 0.039 | FALSE | FALSE | Converged |
| Duffy | FYA+B+ | SAA              | -0.04 (-0.08 - 0.01)  | 0.082 | 0.196 | FALSE | FALSE | Converged |
| Duffy | FYA-B+ | SAA              | -0.04 (-0.09 - 0.01)  | 0.129 | 0.196 | FALSE | FALSE | Converged |
| Duffy | FYA+B+ | SAP              | -0.01 (-0.02 - 0.01)  | 0.344 | 0.350 | FALSE | FALSE | Converged |
| Duffy | FYA-B+ | SAP              | -0.01 (-0.02 - 0.00)  | 0.149 | 0.350 | FALSE | FALSE | Converged |
| Duffy | FYA+B+ | SDF 1A B         | -0.00 (-0.02 - 0.01)  | 0.875 | 0.286 | FALSE | FALSE | Converged |
| Duffy | FYA-B+ | SDF 1A B         | 0.01 (-0.01 - 0.03)   | 0.266 | 0.286 | FALSE | FALSE | Converged |
| Duffy | FYA+B+ | SEGFR            | -0.00 (-0.01 - 0.01)  | 0.827 | 0.923 | FALSE | FALSE | Converged |
| Duffy | FYA-B+ | SEGFR            | -0.00 (-0.01 - 0.01)  | 0.691 | 0.923 | FALSE | FALSE | Converged |
| Duffy | FYA+B+ | SGP130           | 0.00 (-0.01 - 0.01)   | 0.905 | 0.984 | FALSE | FALSE | Converged |
| Duffy | FYA-B+ | SGP130           | -0.00 (-0.01 - 0.01)  | 0.982 | 0.984 | FALSE | FALSE | Converged |
| Duffy | FYA+B+ | SIL4R            | 0.01 (-0.01 - 0.02)   | 0.471 | 0.060 | FALSE | FALSE | Converged |
| Duffy | FYA-B+ | SIL4R            | 0.02 (0.00 - 0.03)    | 0.027 | 0.060 | FALSE | FALSE | Converged |
| Duffy | FYA+B+ | SIL6R            | 0.00 (-0.01 - 0.01)   | 0.585 | 0.675 | FALSE | FALSE | Converged |
| Duffy | FYA-B+ | SIL6R            | 0.01 (-0.01 - 0.02)   | 0.376 | 0.675 | FALSE | FALSE | Converged |
| Duffy | FYA+B+ | SILRII           | -0.00 (-0.02 - 0.01)  | 0.813 | 0.934 | FALSE | FALSE | Converged |
| Duffy | FYA-B+ | SILRII           | -0.00 (-0.02 - 0.01)  | 0.712 | 0.934 | FALSE | FALSE | Converged |
| Duffy | FYA+B+ | STNFRI           | 0.00 (-0.01 - 0.01)   | 0.935 | 0.924 | FALSE | FALSE | Converged |
| Duffy | FYA-B+ | STNFRI           | -0.00 (-0.02 - 0.01)  | 0.816 | 0.924 | FALSE | FALSE | Converged |
| Duffy | FYA+B+ | STNFRII          | 0.00 (-0.01 - 0.01)   | 0.999 | 0.891 | FALSE | FALSE | Converged |
| Duffy | FYA-B+ | STNFRII          | -0.00 (-0.02 - 0.01)  | 0.720 | 0.891 | FALSE | FALSE | Converged |
| Duffy | FYA+B+ | SVEGFR2          | 0.00 (-0.01 - 0.01)   | 0.650 | 0.901 | FALSE | FALSE | Converged |
| Duffy | FYA-B+ | SVEGFR2          | 0.00 (-0.01 - 0.01)   | 0.822 | 0.901 | FALSE | FALSE | Converged |
| Duffy | FYA+B+ | SVEGFR3          | 0.03 (-0.00 - 0.05)   | 0.082 | 0.211 | FALSE | FALSE | Converged |
| Duffy | FYA-B+ | SVEGFR3          | 0.02 (-0.01 - 0.05)   | 0.191 | 0.211 | FALSE | FALSE | Converged |
| Duffy | FYA+B+ | TARC             | 0.03 (0.01 - 0.05)    | 0.009 | 0.000 | TRUE  | FALSE | Converged |
| Duffy | FYA-B+ | TARC             | 0.07 (0.05 - 0.10)    | 0.000 | 0.000 | TRUE  | FALSE | Converged |
| Duffy | FYA+B+ | TGF A            | 0.01 (-0.03 - 0.05)   | 0.628 | 0.513 | FALSE | FALSE | Converged |
| Duffy | FYA-B+ | TGF A            | -0.01 (-0.06 - 0.03)  | 0.631 | 0.513 | FALSE | FALSE | Converged |
| Duffy | FYA+B+ | TGF B1           | -0.01 (-0.06 - 0.04)  | 0.710 | 0.927 | FALSE | FALSE | Converged |
| Duffy | FYA-B+ | TGF B1           | -0.01 (-0.06 - 0.04)  | 0.740 | 0.927 | FALSE | FALSE | Converged |
| Duffy | FYA+B+ | TNFA             | -0.00 (-0.02 - 0.02)  | 0.971 | 0.977 | FALSE | FALSE | Converged |
| Duffy | FYA-B+ | TNFA             | -0.00 (-0.02 - 0.02)  | 0.849 | 0.977 | FALSE | FALSE | Converged |
| Duffy | FYA+B+ | TPO              | -0.05 (-0.11 - 0.02)  | 0.168 | 0.078 | FALSE | FALSE | Converged |
| Duffy | FYA-B+ | TPO              | -0.08 (-0.15 - -0.01) | 0.024 | 0.078 | FALSE | FALSE | Converged |
| Duffy | FYA+B+ | TRAIL            | -0.01 (-0.03 - 0.01)  | 0.326 | 0.464 | FALSE | FALSE | Converged |
| Duffy | FYA-B+ | TRAIL            | -0.01 (-0.04 - 0.01)  | 0.229 | 0.464 | FALSE | FALSE | Converged |
| Duffy | FYA+B+ | VEGF             | 0.02 (-0.04 - 0.07)   | 0.534 | 0.443 | FALSE | FALSE | Converged |
| Duffy | FYA-B+ | VEGF             | -0.01 (-0.07 - 0.05)  | 0.657 | 0.443 | FALSE | FALSE | Converged |
| Duffy | FYA+B+ | X6CKINE          | -0.01 (-0.04 - 0.02)  | 0.595 | 0.417 | FALSE | FALSE | Converged |
| Duffy | FYA-B+ | X6CKINE          | 0.01 (-0.03 - 0.05)   | 0.588 | 0.417 | FALSE | FALSE | Converged |
| Lewis | LeA+   | ADIPONECTIN      | 0.00 (-0.04 - 0.04)   | 0.967 | 0.967 | FALSE | FALSE | Converged |
| Lewis | LeA+   | ADIPSIN          | 0.03 (0.00 - 0.05)    | 0.032 | 0.032 | FALSE | FALSE | Converged |
| Lewis | LeA+   | AMYLIN           | 0.02 (-0.04 - 0.07)   | 0.582 | 0.582 | FALSE | FALSE | Converged |
| Lewis | LeA+   | BCA 1            | 0.01 (-0.01 - 0.03)   | 0.526 | 0.526 | FALSE | FALSE | Converged |
| Lewis | LeA+   | C PEPTIDE        | 0.01 (-0.04 - 0.06)   | 0.651 | 0.651 | FALSE | FALSE | Converged |
| Lewis | LeA+   | CCL19 MIP3B      | 0.02 (-0.01 - 0.04)   | 0.143 | 0.144 | FALSE | FALSE | Converged |
| Lewis | LeA+   | CCL20 MIP3A      | -0.00 (-0.04 - 0.04)  | 0.993 | 0.993 | FALSE | FALSE | Converged |
| Lewis | LeA+   | CRP              | 0.03 (-0.01 - 0.08)   | 0.149 | 0.149 | FALSE | FALSE | Converged |
| Lewis | LeA+   | CTACK            | 0.02 (0.01 - 0.03)    | 0.001 | 0.001 | FALSE | FALSE | Converged |
| Lewis | LeA+   | CXCL11   TAC     | -0.01 (-0.04 - 0.01)  | 0.383 | 0.383 | FALSE | FALSE | Converged |
| Lewis | LeA+   | CXCL6 GCP2       | -0.01 (-0.03 - 0.01)  | 0.202 | 0.202 | FALSE | FALSE | Converged |
| Lewis | LeA+   | CXCL9 MIG        | 0.02 (0.00 - 0.05)    | 0.038 | 0.038 | FALSE | FALSE | Converged |
| Lewis | LeA+   | EGF              | -0.01 (-0.05 - 0.03)  | 0.567 | 0.567 | FALSE | FALSE | Converged |
| Lewis | LeA+   | ENA 78           | -0.02 (-0.04 - 0.01)  | 0.181 | 0.181 | FALSE | FALSE | Converged |
| Lewis | LeA+   | EOTAXIN 2        | 0.00 (-0.03 - 0.03)   | 0.904 | 0.904 | FALSE | FALSE | Converged |
| Lewis | LeA+   | EOTAXIN          | -0.00 (-0.02 - 0.02)  | 0.897 | 0.897 | FALSE | FALSE | Converged |
| Lewis | LeA+   | G CSF            | -0.02 (-0.06 - 0.01)  | 0.134 | 0.134 | FALSE | FALSE | Converged |
| Lewis | LeA+   | GIP              | -0.05 (-0.12 - 0.02)  | 0.186 | 0.187 | FALSE | FALSE | Converged |
| Lewis | LeA+   | GRO              | -0.00 (-0.02 - 0.02)  | 0.949 | 0.949 | FALSE | FALSE | Converged |
| Lewis | LeA+   | IL 13            | -0.15 (-0.64 - 0.34)  | 0.546 | 0.548 | FALSE | FALSE | Converged |
| Lewis | LeA+   | IL 16            | -0.02 (-0.06 - 0.03)  | 0.456 | 0.456 | FALSE | FALSE | Converged |
| Lewis | LeA+   | IL 17            | 0.02 (-0.07 - 0.11)   | 0.672 | 0.672 | FALSE | FALSE | Converged |
| Lewis | LeA+   | IL 23            | -0.34 (-0.74 - 0.05)  | 0.091 | 0.094 | FALSE | FALSE | Converged |
| Lewis | LeA+   | IL 8             | -0.00 (-0.03 - 0.03)  | 0.956 | 0.956 | FALSE | FALSE | Converged |
| Lewis | LeA+   | INSULIN          | 0.01 (-0.06 - 0.08)   | 0.727 | 0.727 | FALSE | FALSE | Converged |
| Lewis | LeA+   | IP 10            | -0.00 (-0.02 - 0.02)  | 0.695 | 0.695 | FALSE | FALSE | Converged |
| Lewis | LeA+   | LEPTIN           | 0.01 (-0.06 - 0.08)   | 0.774 | 0.774 | FALSE | FALSE | Converged |
| Lewis | LeA+   | LIPOCALIN 2 NGAL | 0.05 (0.00 - 0.09)    | 0.030 | 0.030 | FALSE | FALSE | Converged |
| Lewis | LeA+   | MCP 1            | -0.00 (-0.02 - 0.01)  | 0.756 | 0.756 | FALSE | FALSE | Converged |

|       |      |              |                       |       |       |       |       |           |
|-------|------|--------------|-----------------------|-------|-------|-------|-------|-----------|
| Lewis | LeA+ | MCP 2        | -0.02 (-0.04 - 0.01)  | 0.182 | 0.182 | FALSE | FALSE | Converged |
| Lewis | LeA+ | MCP 4        | -0.02 (-0.05 - 0.01)  | 0.309 | 0.309 | FALSE | FALSE | Converged |
| Lewis | LeA+ | MDC          | 0.01 (-0.01 - 0.03)   | 0.182 | 0.182 | FALSE | FALSE | Converged |
| Lewis | LeA+ | MIP 1B       | -0.00 (-0.03 - 0.02)  | 0.780 | 0.780 | FALSE | FALSE | Converged |
| Lewis | LeA+ | MIP 1D       | -0.01 (-0.03 - 0.01)  | 0.252 | 0.252 | FALSE | FALSE | Converged |
| Lewis | LeA+ | PAI 1        | 0.02 (-0.01 - 0.04)   | 0.241 | 0.241 | FALSE | FALSE | Converged |
| Lewis | LeA+ | PP           | -0.09 (-0.16 - -0.01) | 0.025 | 0.025 | FALSE | FALSE | Converged |
| Lewis | LeA+ | RESISTIN     | 0.04 (0.01 - 0.07)    | 0.010 | 0.010 | FALSE | FALSE | Converged |
| Lewis | LeA+ | SAA          | 0.02 (-0.03 - 0.07)   | 0.374 | 0.374 | FALSE | FALSE | Converged |
| Lewis | LeA+ | SAP          | 0.01 (-0.01 - 0.02)   | 0.219 | 0.219 | FALSE | FALSE | Converged |
| Lewis | LeA+ | SDF 1A B     | 0.00 (-0.01 - 0.02)   | 0.898 | 0.898 | FALSE | FALSE | Converged |
| Lewis | LeA+ | SEGFR        | 0.00 (-0.01 - 0.01)   | 0.617 | 0.617 | FALSE | FALSE | Converged |
| Lewis | LeA+ | SGP130       | 0.01 (0.00 - 0.02)    | 0.027 | 0.027 | FALSE | FALSE | Converged |
| Lewis | LeA+ | SIL4R        | 0.00 (-0.01 - 0.01)   | 0.859 | 0.859 | FALSE | FALSE | Converged |
| Lewis | LeA+ | SIL6R        | 0.01 (-0.01 - 0.02)   | 0.404 | 0.404 | FALSE | FALSE | Converged |
| Lewis | LeA+ | SILRII       | 0.01 (-0.01 - 0.02)   | 0.318 | 0.318 | FALSE | FALSE | Converged |
| Lewis | LeA+ | STNFRI       | -0.00 (-0.02 - 0.01)  | 0.743 | 0.743 | FALSE | FALSE | Converged |
| Lewis | LeA+ | STNFRII      | 0.01 (-0.01 - 0.02)   | 0.346 | 0.346 | FALSE | FALSE | Converged |
| Lewis | LeA+ | SVEGFR2      | 0.00 (-0.01 - 0.01)   | 0.717 | 0.717 | FALSE | FALSE | Converged |
| Lewis | LeA+ | SVEGFR3      | 0.03 (-0.00 - 0.06)   | 0.071 | 0.071 | FALSE | FALSE | Converged |
| Lewis | LeA+ | TARC         | -0.00 (-0.03 - 0.02)  | 0.888 | 0.888 | FALSE | FALSE | Converged |
| Lewis | LeA+ | TGF A        | 0.02 (-0.02 - 0.06)   | 0.405 | 0.405 | FALSE | FALSE | Converged |
| Lewis | LeA+ | TGF B1       | 0.03 (-0.02 - 0.09)   | 0.242 | 0.242 | FALSE | FALSE | Converged |
| Lewis | LeA+ | TNFA         | 0.01 (-0.01 - 0.03)   | 0.350 | 0.351 | FALSE | FALSE | Converged |
| Lewis | LeA+ | TPO          | -0.03 (-0.10 - 0.03)  | 0.315 | 0.315 | FALSE | FALSE | Converged |
| Lewis | LeA+ | TRAIL        | 0.01 (-0.01 - 0.03)   | 0.458 | 0.458 | FALSE | FALSE | Converged |
| Lewis | LeA+ | VEGF         | 0.00 (-0.05 - 0.06)   | 0.934 | 0.934 | FALSE | FALSE | Converged |
| Lewis | LeA+ | X6CKINE      | 0.01 (-0.02 - 0.04)   | 0.537 | 0.537 | FALSE | FALSE | Converged |
| ABO   | abA  | ADIPONECTIN  | 0.02 (-0.01 - 0.05)   | 0.142 | 0.039 | FALSE | FALSE | Converged |
| ABO   | abAB | ADIPONECTIN  | -0.05 (-0.12 - 0.02)  | 0.197 | 0.039 | FALSE | FALSE | Converged |
| ABO   | abB  | ADIPONECTIN  | -0.03 (-0.07 - 0.01)  | 0.175 | 0.039 | FALSE | FALSE | Converged |
| ABO   | abA  | ADIPSIN      | -0.01 (-0.02 - 0.01)  | 0.587 | 0.719 | FALSE | FALSE | Converged |
| ABO   | abAB | ADIPSIN      | -0.02 (-0.06 - 0.03)  | 0.424 | 0.719 | FALSE | FALSE | Converged |
| ABO   | abB  | ADIPSIN      | 0.01 (-0.02 - 0.03)   | 0.676 | 0.719 | FALSE | FALSE | Converged |
| ABO   | abA  | AMYLIN       | -0.05 (-0.09 - -0.00) | 0.030 | 0.107 | FALSE | FALSE | Converged |
| ABO   | abAB | AMYLIN       | -0.08 (-0.18 - 0.01)  | 0.081 | 0.107 | FALSE | FALSE | Converged |
| ABO   | abB  | AMYLIN       | -0.03 (-0.11 - 0.04)  | 0.335 | 0.107 | FALSE | FALSE | Converged |
| ABO   | abA  | BCA 1        | -0.01 (-0.03 - 0.00)  | 0.120 | 0.086 | FALSE | FALSE | Converged |
| ABO   | abAB | BCA 1        | 0.03 (-0.01 - 0.07)   | 0.097 | 0.086 | FALSE | FALSE | Converged |
| ABO   | abB  | BCA 1        | -0.00 (-0.03 - 0.02)  | 0.885 | 0.086 | FALSE | FALSE | Converged |
| ABO   | abA  | C PEPTIDE    | -0.00 (-0.04 - 0.04)  | 0.953 | 0.951 | FALSE | FALSE | Converged |
| ABO   | abAB | C PEPTIDE    | 0.00 (-0.09 - 0.09)   | 0.959 | 0.951 | FALSE | FALSE | Converged |
| ABO   | abB  | C PEPTIDE    | -0.02 (-0.07 - 0.04)  | 0.580 | 0.951 | FALSE | FALSE | Converged |
| ABO   | abA  | CCL19 MIP3B  | 0.00 (-0.02 - 0.02)   | 0.958 | 0.090 | FALSE | FALSE | Converged |
| ABO   | abAB | CCL19 MIP3B  | 0.04 (0.00 - 0.07)    | 0.034 | 0.090 | FALSE | FALSE | Converged |
| ABO   | abB  | CCL19 MIP3B  | 0.02 (-0.01 - 0.04)   | 0.149 | 0.090 | FALSE | FALSE | Converged |
| ABO   | abA  | CCL20 MIP3A  | -0.04 (-0.07 - -0.01) | 0.007 | 0.053 | FALSE | FALSE | Converged |
| ABO   | abAB | CCL20 MIP3A  | -0.03 (-0.10 - 0.03)  | 0.294 | 0.053 | FALSE | FALSE | Converged |
| ABO   | abB  | CCL20 MIP3A  | -0.01 (-0.06 - 0.03)  | 0.561 | 0.053 | FALSE | FALSE | Converged |
| ABO   | abA  | CRP          | 0.01 (-0.02 - 0.05)   | 0.423 | 0.291 | FALSE | FALSE | Converged |
| ABO   | abAB | CRP          | 0.06 (-0.01 - 0.13)   | 0.097 | 0.291 | FALSE | FALSE | Converged |
| ABO   | abB  | CRP          | 0.03 (-0.02 - 0.08)   | 0.201 | 0.291 | FALSE | FALSE | Converged |
| ABO   | abA  | CTACK        | -0.01 (-0.02 - 0.00)  | 0.231 | 0.208 | FALSE | FALSE | Converged |
| ABO   | abAB | CTACK        | 0.01 (-0.01 - 0.02)   | 0.554 | 0.208 | FALSE | FALSE | Converged |
| ABO   | abB  | CTACK        | -0.01 (-0.03 - 0.00)  | 0.084 | 0.208 | FALSE | FALSE | Converged |
| ABO   | abA  | CXCL11   TAC | -0.02 (-0.04 - -0.00) | 0.042 | 0.002 | FALSE | FALSE | Converged |
| ABO   | abAB | CXCL11   TAC | 0.05 (0.01 - 0.09)    | 0.025 | 0.002 | FALSE | FALSE | Converged |
| ABO   | abB  | CXCL11   TAC | 0.02 (-0.01 - 0.05)   | 0.237 | 0.002 | FALSE | FALSE | Converged |
| ABO   | abA  | CXCL6 GCP2   | -0.00 (-0.02 - 0.01)  | 0.514 | 0.172 | FALSE | FALSE | Converged |
| ABO   | abAB | CXCL6 GCP2   | 0.01 (-0.02 - 0.04)   | 0.374 | 0.172 | FALSE | FALSE | Converged |
| ABO   | abB  | CXCL6 GCP2   | 0.02 (-0.00 - 0.04)   | 0.116 | 0.172 | FALSE | FALSE | Converged |
| ABO   | abA  | CXCL9 MIG    | -0.02 (-0.04 - 0.00)  | 0.073 | 0.048 | FALSE | FALSE | Converged |
| ABO   | abAB | CXCL9 MIG    | 0.01 (-0.03 - 0.05)   | 0.475 | 0.048 | FALSE | FALSE | Converged |
| ABO   | abB  | CXCL9 MIG    | 0.02 (-0.01 - 0.04)   | 0.282 | 0.048 | FALSE | FALSE | Converged |
| ABO   | abA  | EGF          | 0.04 (0.01 - 0.07)    | 0.024 | 0.074 | FALSE | FALSE | Converged |
| ABO   | abAB | EGF          | 0.07 (-0.00 - 0.14)   | 0.066 | 0.074 | FALSE | FALSE | Converged |
| ABO   | abB  | EGF          | 0.01 (-0.04 - 0.06)   | 0.571 | 0.074 | FALSE | FALSE | Converged |
| ABO   | abA  | ENA 78       | 0.00 (-0.01 - 0.02)   | 0.754 | 0.916 | FALSE | FALSE | Converged |
| ABO   | abAB | ENA 78       | 0.01 (-0.03 - 0.04)   | 0.695 | 0.916 | FALSE | FALSE | Converged |
| ABO   | abB  | ENA 78       | 0.01 (-0.02 - 0.03)   | 0.513 | 0.916 | FALSE | FALSE | Converged |
| ABO   | abA  | EOTAXIN 2    | 0.01 (-0.01 - 0.03)   | 0.507 | 0.181 | FALSE | FALSE | Converged |
| ABO   | abAB | EOTAXIN 2    | 0.02 (-0.03 - 0.07)   | 0.409 | 0.181 | FALSE | FALSE | Converged |
| ABO   | abB  | EOTAXIN 2    | -0.03 (-0.06 - 0.01)  | 0.118 | 0.181 | FALSE | FALSE | Converged |

|     |      |                  |                       |       |       |       |       |           |
|-----|------|------------------|-----------------------|-------|-------|-------|-------|-----------|
| ABO | abA  | EOTAXIN          | -0.01 (-0.02 - 0.01)  | 0.435 | 0.471 | FALSE | FALSE | Converged |
| ABO | abAB | EOTAXIN          | -0.01 (-0.05 - 0.02)  | 0.422 | 0.471 | FALSE | FALSE | Converged |
| ABO | abB  | EOTAXIN          | 0.01 (-0.01 - 0.03)   | 0.414 | 0.471 | FALSE | FALSE | Converged |
| ABO | abA  | G CSF            | 0.02 (-0.00 - 0.05)   | 0.077 | 0.083 | FALSE | FALSE | Converged |
| ABO | abAB | G CSF            | 0.06 (-0.00 - 0.11)   | 0.056 | 0.083 | FALSE | FALSE | Converged |
| ABO | abB  | G CSF            | -0.00 (-0.04 - 0.03)  | 0.841 | 0.083 | FALSE | FALSE | Converged |
| ABO | abA  | GIP              | -0.02 (-0.08 - 0.04)  | 0.487 | 0.765 | FALSE | FALSE | Converged |
| ABO | abAB | GIP              | -0.06 (-0.20 - 0.09)  | 0.428 | 0.765 | FALSE | FALSE | Converged |
| ABO | abB  | GIP              | 0.01 (-0.08 - 0.10)   | 0.877 | 0.765 | FALSE | FALSE | Converged |
| ABO | abA  | GRO              | 0.00 (-0.01 - 0.01)   | 0.647 | 0.297 | FALSE | FALSE | Converged |
| ABO | abAB | GRO              | 0.01 (-0.02 - 0.04)   | 0.441 | 0.297 | FALSE | FALSE | Converged |
| ABO | abB  | GRO              | 0.02 (-0.00 - 0.03)   | 0.068 | 0.297 | FALSE | FALSE | Converged |
| ABO | abA  | IL 13            | 0.03 (-0.25 - 0.32)   | 0.826 | 0.004 | FALSE | FALSE | Converged |
| ABO | abAB | IL 13            | 0.62 (0.24 - 0.99)    | 0.001 | 0.004 | FALSE | FALSE | Converged |
| ABO | abB  | IL 13            | -0.12 (-0.50 - 0.26)  | 0.539 | 0.004 | FALSE | FALSE | Converged |
| ABO | abA  | IL 16            | 0.01 (-0.03 - 0.04)   | 0.586 | 0.041 | FALSE | FALSE | Converged |
| ABO | abAB | IL 16            | 0.09 (0.02 - 0.17)    | 0.014 | 0.041 | FALSE | FALSE | Converged |
| ABO | abB  | IL 16            | -0.03 (-0.08 - 0.02)  | 0.300 | 0.041 | FALSE | FALSE | Converged |
| ABO | abA  | IL 17            | 0.02 (-0.04 - 0.09)   | 0.456 | 0.438 | FALSE | FALSE | Converged |
| ABO | abAB | IL 17            | 0.03 (-0.10 - 0.16)   | 0.657 | 0.438 | FALSE | FALSE | Converged |
| ABO | abB  | IL 17            | -0.05 (-0.14 - 0.04)  | 0.297 | 0.438 | FALSE | FALSE | Converged |
| ABO | abA  | IL 23            | 0.04 (-0.22 - 0.30)   | 0.756 | 0.041 | FALSE | FALSE | Converged |
| ABO | abAB | IL 23            | 0.41 (0.09 - 0.73)    | 0.011 | 0.041 | FALSE | FALSE | Converged |
| ABO | abB  | IL 23            | -0.09 (-0.60 - 0.42)  | 0.728 | 0.041 | FALSE | FALSE | Converged |
| ABO | abA  | IL 8             | -0.02 (-0.05 - 0.00)  | 0.102 | 0.204 | FALSE | FALSE | Converged |
| ABO | abAB | IL 8             | 0.01 (-0.05 - 0.06)   | 0.748 | 0.204 | FALSE | FALSE | Converged |
| ABO | abB  | IL 8             | 0.01 (-0.03 - 0.05)   | 0.626 | 0.204 | FALSE | FALSE | Converged |
| ABO | abA  | INSULIN          | -0.03 (-0.08 - 0.02)  | 0.236 | 0.661 | FALSE | FALSE | Converged |
| ABO | abAB | INSULIN          | -0.02 (-0.15 - 0.10)  | 0.703 | 0.661 | FALSE | FALSE | Converged |
| ABO | abB  | INSULIN          | -0.03 (-0.11 - 0.05)  | 0.418 | 0.661 | FALSE | FALSE | Converged |
| ABO | abA  | IP 10            | -0.01 (-0.02 - 0.01)  | 0.376 | 0.125 | FALSE | FALSE | Converged |
| ABO | abAB | IP 10            | 0.03 (-0.00 - 0.06)   | 0.086 | 0.125 | FALSE | FALSE | Converged |
| ABO | abB  | IP 10            | 0.01 (-0.01 - 0.03)   | 0.444 | 0.125 | FALSE | FALSE | Converged |
| ABO | abA  | LEPTIN           | -0.00 (-0.06 - 0.06)  | 0.983 | 0.063 | FALSE | FALSE | Converged |
| ABO | abAB | LEPTIN           | 0.13 (0.01 - 0.25)    | 0.030 | 0.063 | FALSE | FALSE | Converged |
| ABO | abB  | LEPTIN           | -0.04 (-0.12 - 0.03)  | 0.232 | 0.063 | FALSE | FALSE | Converged |
| ABO | abA  | LIPOCALIN 2 NGAL | -0.00 (-0.04 - 0.03)  | 0.839 | 0.549 | FALSE | FALSE | Converged |
| ABO | abAB | LIPOCALIN 2 NGAL | -0.08 (-0.18 - 0.03)  | 0.146 | 0.549 | FALSE | FALSE | Converged |
| ABO | abB  | LIPOCALIN 2 NGAL | -0.00 (-0.06 - 0.05)  | 0.931 | 0.549 | FALSE | FALSE | Converged |
| ABO | abA  | MCP 1            | 0.01 (-0.00 - 0.02)   | 0.062 | 0.112 | FALSE | FALSE | Converged |
| ABO | abAB | MCP 1            | 0.01 (-0.02 - 0.04)   | 0.400 | 0.112 | FALSE | FALSE | Converged |
| ABO | abB  | MCP 1            | 0.02 (0.00 - 0.03)    | 0.029 | 0.112 | FALSE | FALSE | Converged |
| ABO | abA  | MCP 2            | -0.01 (-0.02 - 0.01)  | 0.582 | 0.219 | FALSE | FALSE | Converged |
| ABO | abAB | MCP 2            | 0.03 (-0.00 - 0.07)   | 0.073 | 0.219 | FALSE | FALSE | Converged |
| ABO | abB  | MCP 2            | 0.00 (-0.03 - 0.03)   | 0.873 | 0.219 | FALSE | FALSE | Converged |
| ABO | abA  | MCP 4            | 0.01 (-0.02 - 0.03)   | 0.478 | 0.096 | FALSE | FALSE | Converged |
| ABO | abAB | MCP 4            | 0.06 (0.01 - 0.11)    | 0.015 | 0.096 | FALSE | FALSE | Converged |
| ABO | abB  | MCP 4            | 0.02 (-0.02 - 0.06)   | 0.272 | 0.096 | FALSE | FALSE | Converged |
| ABO | abA  | MDC              | 0.01 (-0.01 - 0.02)   | 0.374 | 0.700 | FALSE | FALSE | Converged |
| ABO | abAB | MDC              | -0.01 (-0.04 - 0.03)  | 0.750 | 0.700 | FALSE | FALSE | Converged |
| ABO | abB  | MDC              | -0.00 (-0.02 - 0.01)  | 0.746 | 0.700 | FALSE | FALSE | Converged |
| ABO | abA  | MIP 1B           | 0.00 (-0.02 - 0.02)   | 0.877 | 0.705 | FALSE | FALSE | Converged |
| ABO | abAB | MIP 1B           | 0.02 (-0.02 - 0.06)   | 0.284 | 0.705 | FALSE | FALSE | Converged |
| ABO | abB  | MIP 1B           | -0.00 (-0.04 - 0.03)  | 0.769 | 0.705 | FALSE | FALSE | Converged |
| ABO | abA  | MIP 1D           | -0.02 (-0.04 - -0.01) | 0.008 | 0.027 | FALSE | FALSE | Converged |
| ABO | abAB | MIP 1D           | -0.02 (-0.06 - 0.02)  | 0.377 | 0.027 | FALSE | FALSE | Converged |
| ABO | abB  | MIP 1D           | 0.01 (-0.02 - 0.03)   | 0.564 | 0.027 | FALSE | FALSE | Converged |
| ABO | abA  | PAI 1            | -0.00 (-0.02 - 0.01)  | 0.622 | 0.607 | FALSE | FALSE | Converged |
| ABO | abAB | PAI 1            | -0.01 (-0.06 - 0.04)  | 0.763 | 0.607 | FALSE | FALSE | Converged |
| ABO | abB  | PAI 1            | 0.01 (-0.01 - 0.04)   | 0.320 | 0.607 | FALSE | FALSE | Converged |
| ABO | abA  | PP               | 0.05 (-0.01 - 0.11)   | 0.114 | 0.447 | FALSE | FALSE | Converged |
| ABO | abAB | PP               | 0.05 (-0.09 - 0.20)   | 0.493 | 0.447 | FALSE | FALSE | Converged |
| ABO | abB  | PP               | 0.02 (-0.07 - 0.11)   | 0.654 | 0.447 | FALSE | FALSE | Converged |
| ABO | abA  | RESISTIN         | 0.00 (-0.02 - 0.03)   | 0.860 | 0.847 | FALSE | FALSE | Converged |
| ABO | abAB | RESISTIN         | -0.03 (-0.09 - 0.04)  | 0.420 | 0.847 | FALSE | FALSE | Converged |
| ABO | abB  | RESISTIN         | -0.00 (-0.04 - 0.03)  | 0.834 | 0.847 | FALSE | FALSE | Converged |
| ABO | abA  | SAA              | 0.00 (-0.03 - 0.04)   | 0.821 | 0.944 | FALSE | FALSE | Converged |
| ABO | abAB | SAA              | 0.02 (-0.05 - 0.09)   | 0.593 | 0.944 | FALSE | FALSE | Converged |
| ABO | abB  | SAA              | -0.00 (-0.05 - 0.04)  | 0.898 | 0.944 | FALSE | FALSE | Converged |
| ABO | abA  | SAP              | 0.00 (-0.01 - 0.01)   | 0.958 | 0.160 | FALSE | FALSE | Converged |
| ABO | abAB | SAP              | 0.02 (0.00 - 0.05)    | 0.031 | 0.160 | FALSE | FALSE | Converged |
| ABO | abB  | SAP              | -0.00 (-0.02 - 0.02)  | 0.932 | 0.160 | FALSE | FALSE | Converged |
| ABO | abA  | SDF 1A B         | 0.01 (-0.00 - 0.02)   | 0.238 | 0.114 | FALSE | FALSE | Converged |

|          |             |             |                       |       |       |       |       |           |
|----------|-------------|-------------|-----------------------|-------|-------|-------|-------|-----------|
| ABO      | abAB        | SDF 1A B    | 0.03 (0.00 - 0.05)    | 0.028 | 0.114 | FALSE | FALSE | Converged |
| ABO      | abB         | SDF 1A B    | 0.01 (-0.01 - 0.03)   | 0.162 | 0.114 | FALSE | FALSE | Converged |
| ABO      | abA         | SEGFR       | 0.00 (-0.01 - 0.01)   | 0.713 | 0.204 | FALSE | FALSE | Converged |
| ABO      | abAB        | SEGFR       | 0.01 (-0.00 - 0.03)   | 0.091 | 0.204 | FALSE | FALSE | Converged |
| ABO      | abB         | SEGFR       | 0.01 (-0.00 - 0.02)   | 0.137 | 0.204 | FALSE | FALSE | Converged |
| ABO      | abA         | SGP130      | -0.02 (-0.03 - -0.01) | 0.000 | 0.000 | TRUE  | FALSE | Converged |
| ABO      | abAB        | SGP130      | -0.00 (-0.02 - 0.02)  | 0.945 | 0.000 | TRUE  | FALSE | Converged |
| ABO      | abB         | SGP130      | 0.01 (0.00 - 0.02)    | 0.032 | 0.000 | TRUE  | FALSE | Converged |
| ABO      | abA         | SIL4R       | 0.00 (-0.01 - 0.02)   | 0.645 | 0.580 | FALSE | FALSE | Converged |
| ABO      | abAB        | SIL4R       | 0.00 (-0.03 - 0.03)   | 0.885 | 0.580 | FALSE | FALSE | Converged |
| ABO      | abB         | SIL4R       | 0.01 (-0.00 - 0.03)   | 0.162 | 0.580 | FALSE | FALSE | Converged |
| ABO      | abA         | SIL6R       | 0.00 (-0.01 - 0.01)   | 0.417 | 0.509 | FALSE | FALSE | Converged |
| ABO      | abAB        | SIL6R       | 0.01 (-0.01 - 0.03)   | 0.443 | 0.509 | FALSE | FALSE | Converged |
| ABO      | abB         | SIL6R       | -0.00 (-0.02 - 0.01)  | 0.471 | 0.509 | FALSE | FALSE | Converged |
| ABO      | abA         | SILRII      | 0.01 (-0.01 - 0.02)   | 0.263 | 0.681 | FALSE | FALSE | Converged |
| ABO      | abAB        | SILRII      | -0.00 (-0.03 - 0.03)  | 0.948 | 0.681 | FALSE | FALSE | Converged |
| ABO      | abB         | SILRII      | 0.01 (-0.01 - 0.02)   | 0.439 | 0.681 | FALSE | FALSE | Converged |
| ABO      | abA         | STNFRI      | 0.01 (-0.01 - 0.02)   | 0.305 | 0.076 | FALSE | FALSE | Converged |
| ABO      | abAB        | STNFRI      | 0.03 (-0.01 - 0.06)   | 0.010 | 0.076 | FALSE | FALSE | Converged |
| ABO      | abB         | STNFRI      | 0.00 (-0.01 - 0.02)   | 0.679 | 0.076 | FALSE | FALSE | Converged |
| ABO      | abA         | STNFRII     | -0.00 (-0.01 - 0.01)  | 0.372 | 0.147 | FALSE | FALSE | Converged |
| ABO      | abAB        | STNFRII     | 0.02 (-0.01 - 0.04)   | 0.208 | 0.147 | FALSE | FALSE | Converged |
| ABO      | abB         | STNFRII     | -0.01 (-0.03 - 0.00)  | 0.097 | 0.147 | FALSE | FALSE | Converged |
| ABO      | abA         | SVEGFR2     | -0.04 (-0.05 - -0.03) | 0.000 | 0.000 | TRUE  | FALSE | Converged |
| ABO      | abAB        | SVEGFR2     | -0.03 (-0.05 - -0.01) | 0.006 | 0.000 | TRUE  | FALSE | Converged |
| ABO      | abB         | SVEGFR2     | 0.00 (-0.01 - 0.02)   | 0.708 | 0.000 | TRUE  | FALSE | Converged |
| ABO      | abA         | SVEGFR3     | -0.08 (-0.10 - -0.05) | 0.000 | 0.000 | TRUE  | FALSE | Converged |
| ABO      | abAB        | SVEGFR3     | -0.03 (-0.07 - 0.02)  | 0.304 | 0.000 | TRUE  | FALSE | Converged |
| ABO      | abB         | SVEGFR3     | 0.03 (-0.00 - 0.07)   | 0.068 | 0.000 | TRUE  | FALSE | Converged |
| ABO      | abA         | TARC        | -0.01 (-0.03 - 0.01)  | 0.236 | 0.177 | FALSE | FALSE | Converged |
| ABO      | abAB        | TARC        | 0.02 (-0.02 - 0.05)   | 0.372 | 0.177 | FALSE | FALSE | Converged |
| ABO      | abB         | TARC        | -0.03 (-0.06 - 0.01)  | 0.109 | 0.177 | FALSE | FALSE | Converged |
| ABO      | abA         | TGF A       | 0.03 (-0.00 - 0.07)   | 0.063 | 0.026 | FALSE | FALSE | Converged |
| ABO      | abAB        | TGF A       | 0.08 (0.01 - 0.14)    | 0.024 | 0.026 | FALSE | FALSE | Converged |
| ABO      | abB         | TGF A       | -0.02 (-0.07 - 0.04)  | 0.539 | 0.026 | FALSE | FALSE | Converged |
| ABO      | abA         | TGF B1      | -0.01 (-0.05 - 0.03)  | 0.675 | 0.214 | FALSE | FALSE | Converged |
| ABO      | abAB        | TGF B1      | 0.05 (-0.01 - 0.11)   | 0.092 | 0.214 | FALSE | FALSE | Converged |
| ABO      | abB         | TGF B1      | 0.02 (-0.03 - 0.07)   | 0.415 | 0.214 | FALSE | FALSE | Converged |
| ABO      | abA         | TNFA        | -0.00 (-0.02 - 0.01)  | 0.635 | 0.155 | FALSE | FALSE | Converged |
| ABO      | abAB        | TNFA        | 0.03 (0.00 - 0.07)    | 0.046 | 0.155 | FALSE | FALSE | Converged |
| ABO      | abB         | TNFA        | 0.00 (-0.02 - 0.03)   | 0.897 | 0.155 | FALSE | FALSE | Converged |
| ABO      | abA         | TPO         | 0.03 (-0.02 - 0.09)   | 0.190 | 0.329 | FALSE | FALSE | Converged |
| ABO      | abAB        | TPO         | 0.05 (-0.06 - 0.16)   | 0.374 | 0.329 | FALSE | FALSE | Converged |
| ABO      | abB         | TPO         | -0.02 (-0.10 - 0.05)  | 0.555 | 0.329 | FALSE | FALSE | Converged |
| ABO      | abA         | TRAIL       | -0.02 (-0.03 - 0.00)  | 0.093 | 0.179 | FALSE | FALSE | Converged |
| ABO      | abAB        | TRAIL       | 0.01 (-0.02 - 0.04)   | 0.444 | 0.179 | FALSE | FALSE | Converged |
| ABO      | abB         | TRAIL       | 0.00 (-0.02 - 0.03)   | 0.863 | 0.179 | FALSE | FALSE | Converged |
| ABO      | abA         | VEGF        | -0.01 (-0.06 - 0.03)  | 0.550 | 0.929 | FALSE | FALSE | Converged |
| ABO      | abAB        | VEGF        | -0.01 (-0.10 - 0.08)  | 0.818 | 0.929 | FALSE | FALSE | Converged |
| ABO      | abB         | VEGF        | -0.02 (-0.08 - 0.05)  | 0.621 | 0.929 | FALSE | FALSE | Converged |
| ABO      | abA         | X6CKINE     | 0.02 (-0.00 - 0.05)   | 0.084 | 0.017 | FALSE | FALSE | Converged |
| ABO      | abAB        | X6CKINE     | 0.08 (0.03 - 0.13)    | 0.003 | 0.017 | FALSE | FALSE | Converged |
| ABO      | abB         | X6CKINE     | 0.00 (-0.03 - 0.04)   | 0.809 | 0.017 | FALSE | FALSE | Converged |
| Secretor | Nonsecretor | FGF 2       | 1.01 (0.83 - 1.22)    | 0.935 | 0.935 | FALSE | TRUE  | Converged |
| Secretor | Nonsecretor | FLT 3L      | 1.33 (0.67 - 2.65)    | 0.411 | 0.412 | FALSE | TRUE  | Converged |
| Secretor | Nonsecretor | FRACTALKINE | 0.00 (0.00 - 0.00)    | 0.000 | 0.000 | FALSE | TRUE  | Converged |
| Secretor | Nonsecretor | GLP 1       | 1.54 (1.03 - 2.31)    | 0.034 | 0.034 | FALSE | TRUE  | Converged |
| Secretor | Nonsecretor | GLUCAGON    | 1.62 (0.95 - 2.75)    | 0.075 | 0.076 | FALSE | TRUE  | Converged |
| Secretor | Nonsecretor | GM CSF      | 0.80 (0.52 - 1.24)    | 0.324 | 0.324 | FALSE | TRUE  | Converged |
| Secretor | Nonsecretor | IFNA2       | -                     | 0.000 | 0.000 | FALSE | TRUE  | Converged |
| Secretor | Nonsecretor | IFNG        | 1.02 (0.76 - 1.35)    | 0.918 | 0.918 | FALSE | TRUE  | Converged |
| Secretor | Nonsecretor | IL 10       | 1.18 (0.78 - 1.78)    | 0.424 | 0.424 | FALSE | TRUE  | Converged |
| Secretor | Nonsecretor | IL 11       | 1.17 (0.85 - 1.62)    | 0.326 | 0.326 | FALSE | TRUE  | Converged |
| Secretor | Nonsecretor | IL 12P40    | 0.45 (0.28 - 0.73)    | 0.001 | 0.001 | FALSE | TRUE  | Converged |
| Secretor | Nonsecretor | IL 15       | 0.72 (0.50 - 1.04)    | 0.083 | 0.083 | FALSE | TRUE  | Converged |
| Secretor | Nonsecretor | IL 1A       | 0.70 (0.49 - 1.01)    | 0.055 | 0.055 | FALSE | TRUE  | Converged |
| Secretor | Nonsecretor | IL 1B       | 0.44 (0.06 - 3.25)    | 0.422 | 0.422 | FALSE | TRUE  | Converged |
| Secretor | Nonsecretor | IL 1RA      | -                     | 0.000 | 0.000 | FALSE | TRUE  | Converged |
| Secretor | Nonsecretor | IL 2        | 0.81 (0.59 - 1.12)    | 0.202 | 0.203 | FALSE | TRUE  | Converged |
| Secretor | Nonsecretor | IL 29 IFNL1 | 1.06 (0.71 - 1.59)    | 0.770 | 0.770 | FALSE | TRUE  | Converged |
| Secretor | Nonsecretor | IL 33       | 0.91 (0.74 - 1.13)    | 0.410 | 0.410 | FALSE | TRUE  | Converged |
| Secretor | Nonsecretor | IL 4        | 1.17 (0.72 - 1.89)    | 0.521 | 0.521 | FALSE | TRUE  | Converged |
| Secretor | Nonsecretor | IL 5        | 0.66 (0.07 - 6.53)    | 0.723 | 0.723 | FALSE | TRUE  | Converged |

|          |             |             |                     |       |       |       |      |           |
|----------|-------------|-------------|---------------------|-------|-------|-------|------|-----------|
| Secretor | Nonsecretor | IL 6        | 0.00 (0.00 - 0.00)  | 0.000 | 0.000 | FALSE | TRUE | Converged |
| Secretor | Nonsecretor | IL 7        | 1.36 (0.67 - 2.74)  | 0.391 | 0.391 | FALSE | TRUE | Converged |
| Secretor | Nonsecretor | MCP 3       | 1.00 (0.88 - 1.14)  | 1.000 | 1.000 | FALSE | TRUE | Converged |
| Secretor | Nonsecretor | MIP 1A      | 1.58 (0.99 - 2.53)  | 0.058 | 0.058 | FALSE | TRUE | Converged |
| Secretor | Nonsecretor | PYY         | 0.66 (0.26 - 1.71)  | 0.393 | 0.393 | FALSE | TRUE | Converged |
| Secretor | Nonsecretor | SCF         | 1.10 (0.91 - 1.34)  | 0.304 | 0.304 | FALSE | TRUE | Converged |
| Secretor | Nonsecretor | SIL 2RA     | 1.42 (0.86 - 2.36)  | 0.171 | 0.171 | FALSE | TRUE | Converged |
| Secretor | Nonsecretor | TNF B       | 0.90 (0.74 - 1.10)  | 0.324 | 0.324 | FALSE | TRUE | Converged |
| Secretor | Nonsecretor | TSLP        | 0.90 (0.71 - 1.14)  | 0.382 | 0.383 | FALSE | TRUE | Converged |
| Secretor | Nonsecretor | SCD40L      | 0.95 (0.70 - 1.30)  | 0.769 | 0.769 | FALSE | TRUE | Converged |
| Dombrock | DoA+B+      | FGF 2       | 1.01 (0.87 - 1.18)  | 0.870 | 0.333 | FALSE | TRUE | Converged |
| Dombrock | DoA+B+      | FGF 2       | 0.87 (0.71 - 1.08)  | 0.206 | 0.333 | FALSE | TRUE | Converged |
| Dombrock | DoA+B+      | FLT 3L      | 1.05 (0.61 - 1.80)  | 0.868 | 0.342 | FALSE | TRUE | Converged |
| Dombrock | DoA+B+      | FLT 3L      | 0.59 (0.26 - 1.34)  | 0.205 | 0.342 | FALSE | TRUE | Converged |
| Dombrock | DoA+B+      | GLP 1       | 1.34 (0.94 - 1.92)  | 0.108 | 0.182 | FALSE | TRUE | Converged |
| Dombrock | DoA+B+      | GLP 1       | 0.99 (0.61 - 1.59)  | 0.961 | 0.182 | FALSE | TRUE | Converged |
| Dombrock | DoA+B+      | GLUCAGON    | 1.13 (0.72 - 1.78)  | 0.594 | 0.228 | FALSE | TRUE | Converged |
| Dombrock | DoA+B+      | GLUCAGON    | 1.69 (0.92 - 3.11)  | 0.090 | 0.228 | FALSE | TRUE | Converged |
| Dombrock | DoA+B+      | GM CSF      | 0.78 (0.54 - 1.11)  | 0.162 | 0.304 | FALSE | TRUE | Converged |
| Dombrock | DoA+B+      | GM CSF      | 0.74 (0.45 - 1.21)  | 0.234 | 0.304 | FALSE | TRUE | Converged |
| Dombrock | DoA+B+      | IFNG        | 1.15 (0.91 - 1.44)  | 0.236 | 0.471 | FALSE | TRUE | Converged |
| Dombrock | DoA+B+      | IFNG        | 1.03 (0.75 - 1.42)  | 0.844 | 0.471 | FALSE | TRUE | Converged |
| Dombrock | DoA+B+      | IL 10       | 1.22 (0.89 - 1.67)  | 0.216 | 0.269 | FALSE | TRUE | Converged |
| Dombrock | DoA+B+      | IL 10       | 1.38 (0.90 - 2.11)  | 0.137 | 0.269 | FALSE | TRUE | Converged |
| Dombrock | DoA+B+      | IL 11       | 1.05 (0.81 - 1.36)  | 0.726 | 0.744 | FALSE | TRUE | Converged |
| Dombrock | DoA+B+      | IL 11       | 1.15 (0.80 - 1.66)  | 0.442 | 0.744 | FALSE | TRUE | Converged |
| Dombrock | DoA+B+      | IL 12P40    | 0.72 (0.51 - 1.00)  | 0.053 | 0.123 | FALSE | TRUE | Converged |
| Dombrock | DoA+B+      | IL 12P40    | 0.96 (0.62 - 1.48)  | 0.851 | 0.123 | FALSE | TRUE | Converged |
| Dombrock | DoA+B+      | IL 12P70    | 0.00 (0.00 - 0.00)  | 0.000 | 0.000 | FALSE | TRUE | Converged |
| Dombrock | DoA+B+      | IL 12P70    | 0.00 (0.00 - 0.00)  | 0.000 | 0.000 | FALSE | TRUE | Converged |
| Dombrock | DoA+B+      | IL 15       | 0.93 (0.72 - 1.22)  | 0.615 | 0.499 | FALSE | TRUE | Converged |
| Dombrock | DoA+B+      | IL 15       | 0.79 (0.53 - 1.17)  | 0.238 | 0.499 | FALSE | TRUE | Converged |
| Dombrock | DoA+B+      | IL 1A       | 0.85 (0.65 - 1.10)  | 0.213 | 0.184 | FALSE | TRUE | Converged |
| Dombrock | DoA+B+      | IL 1A       | 0.71 (0.48 - 1.05)  | 0.084 | 0.184 | FALSE | TRUE | Converged |
| Dombrock | DoA+B+      | IL 1B       | 0.64 (0.19 - 2.11)  | 0.461 | 0.514 | FALSE | TRUE | Converged |
| Dombrock | DoA+B+      | IL 1B       | 2.54 (0.12 - 55.73) | 0.554 | 0.514 | FALSE | TRUE | Converged |
| Dombrock | DoA+B+      | IL 1RA      | -                   | 0.000 | 0.000 | FALSE | TRUE | Converged |
| Dombrock | DoA+B+      | IL 1RA      | 0.00 (0.00 - 0.00)  | 0.000 | 0.000 | FALSE | TRUE | Converged |
| Dombrock | DoA+B+      | IL 2        | 1.02 (0.80 - 1.30)  | 0.884 | 0.980 | FALSE | TRUE | Converged |
| Dombrock | DoA+B+      | IL 2        | 0.99 (0.70 - 1.40)  | 0.945 | 0.980 | FALSE | TRUE | Converged |
| Dombrock | DoA+B+      | IL 29 IFNL1 | 0.95 (0.71 - 1.27)  | 0.725 | 0.433 | FALSE | TRUE | Converged |
| Dombrock | DoA+B+      | IL 29 IFNL1 | 0.76 (0.50 - 1.16)  | 0.200 | 0.433 | FALSE | TRUE | Converged |
| Dombrock | DoA+B+      | IL 33       | 1.06 (0.90 - 1.25)  | 0.498 | 0.015 | FALSE | TRUE | Converged |
| Dombrock | DoA+B+      | IL 33       | 0.75 (0.59 - 0.96)  | 0.021 | 0.015 | FALSE | TRUE | Converged |
| Dombrock | DoA+B+      | IL 4        | 1.05 (0.72 - 1.52)  | 0.815 | 0.961 | FALSE | TRUE | Converged |
| Dombrock | DoA+B+      | IL 4        | 0.98 (0.57 - 1.71)  | 0.956 | 0.961 | FALSE | TRUE | Converged |
| Dombrock | DoA+B+      | IL 5        | 1.13 (0.35 - 3.70)  | 0.834 | 0.000 | FALSE | TRUE | Converged |
| Dombrock | DoA+B+      | IL 5        | -                   | 0.000 | 0.000 | FALSE | TRUE | Converged |
| Dombrock | DoA+B+      | IL 7        | 0.80 (0.44 - 1.45)  | 0.469 | 0.624 | FALSE | TRUE | Converged |
| Dombrock | DoA+B+      | IL 7        | 0.72 (0.34 - 1.50)  | 0.375 | 0.624 | FALSE | TRUE | Converged |
| Dombrock | DoA+B+      | MCP 3       | 0.00 (0.00 - 0.00)  | 0.000 | 0.000 | FALSE | TRUE | Converged |
| Dombrock | DoA+B+      | MCP 3       | 0.00 (0.00 - 0.00)  | 0.000 | 0.000 | FALSE | TRUE | Converged |
| Dombrock | DoA+B+      | MIP 1A      | 1.07 (0.73 - 1.56)  | 0.735 | 0.881 | FALSE | TRUE | Converged |
| Dombrock | DoA+B+      | MIP 1A      | 1.14 (0.67 - 1.94)  | 0.629 | 0.881 | FALSE | TRUE | Converged |
| Dombrock | DoA+B+      | PYY         | -                   | 0.000 | 0.000 | FALSE | TRUE | Converged |
| Dombrock | DoA+B+      | PYY         | -                   | 0.000 | 0.000 | FALSE | TRUE | Converged |
| Dombrock | DoA+B+      | SCF         | 0.97 (0.83 - 1.13)  | 0.684 | 0.919 | FALSE | TRUE | Converged |
| Dombrock | DoA+B+      | SCF         | 0.99 (0.80 - 1.22)  | 0.897 | 0.919 | FALSE | TRUE | Converged |
| Dombrock | DoA+B+      | SIL 2RA     | 1.42 (0.90 - 2.24)  | 0.127 | 0.223 | FALSE | TRUE | Converged |
| Dombrock | DoA+B+      | SIL 2RA     | 1.56 (0.85 - 2.85)  | 0.149 | 0.223 | FALSE | TRUE | Converged |
| Dombrock | DoA+B+      | TNF B       | 0.93 (0.80 - 1.08)  | 0.336 | 0.166 | FALSE | TRUE | Converged |
| Dombrock | DoA+B+      | TNF B       | 0.81 (0.65 - 1.01)  | 0.060 | 0.166 | FALSE | TRUE | Converged |
| Dombrock | DoA+B+      | TSLP        | 0.97 (0.81 - 1.16)  | 0.746 | 0.023 | FALSE | TRUE | Converged |
| Dombrock | DoA+B+      | TSLP        | 0.70 (0.53 - 0.91)  | 0.008 | 0.023 | FALSE | TRUE | Converged |
| Dombrock | DoA+B+      | SCD40L      | 0.96 (0.75 - 1.22)  | 0.724 | 0.622 | FALSE | TRUE | Converged |
| Dombrock | DoA+B+      | SCD40L      | 1.13 (0.80 - 1.59)  | 0.494 | 0.622 | FALSE | TRUE | Converged |
| RhE      | Ee          | FGF 2       | 1.00 (0.83 - 1.20)  | 0.990 | 0.503 | FALSE | TRUE | Converged |
| RhE      | ee          | FGF 2       | 0.65 (0.32 - 1.33)  | 0.242 | 0.503 | FALSE | TRUE | Converged |
| RhE      | Ee          | FLT 3L      | 0.50 (0.22 - 1.12)  | 0.092 | 0.118 | FALSE | TRUE | Converged |
| RhE      | ee          | FLT 3L      | 2.08 (0.55 - 7.77)  | 0.279 | 0.118 | FALSE | TRUE | Converged |
| RhE      | Ee          | FRACTALKINE | -                   | 0.000 | 0.000 | FALSE | TRUE | Converged |
| RhE      | ee          | FRACTALKINE | 0.00 (0.00 - 0.00)  | 0.000 | 0.000 | FALSE | TRUE | Converged |
| RhE      | Ee          | GLP 1       | 0.92 (0.59 - 1.42)  | 0.697 | 0.852 | FALSE | TRUE | Converged |

|      |        |             |                     |       |       |       |      |           |
|------|--------|-------------|---------------------|-------|-------|-------|------|-----------|
| RhE  | ee     | GLP 1       | 0.74 (0.18 -2.99)   | 0.667 | 0.852 | FALSE | TRUE | Converged |
| RhE  | Ee     | GLUCAGON    | 0.67 (0.39 -1.15)   | 0.150 | 0.006 | FALSE | TRUE | Converged |
| RhE  | ee     | GLUCAGON    | 4.32 (1.47 -12.68)  | 0.008 | 0.006 | FALSE | TRUE | Converged |
| RhE  | Ee     | GM CSF      | 0.77 (0.50 -1.17)   | 0.224 | 0.195 | FALSE | TRUE | Converged |
| RhE  | ee     | GM CSF      | 0.32 (0.06 -1.60)   | 0.165 | 0.195 | FALSE | TRUE | Converged |
| RhE  | Ee     | IFNG        | 0.81 (0.62 -1.07)   | 0.138 | 0.218 | FALSE | TRUE | Converged |
| RhE  | ee     | IFNG        | 1.45 (0.60 -3.48)   | 0.409 | 0.218 | FALSE | TRUE | Converged |
| RhE  | Ee     | IL 10       | 1.03 (0.70 -1.49)   | 0.897 | 0.936 | FALSE | TRUE | Converged |
| RhE  | ee     | IL 10       | 0.80 (0.21 -3.08)   | 0.741 | 0.936 | FALSE | TRUE | Converged |
| RhE  | Ee     | IL 11       | 0.80 (0.58 -1.11)   | 0.180 | 0.254 | FALSE | TRUE | Converged |
| RhE  | ee     | IL 11       | 1.47 (0.62 -3.50)   | 0.381 | 0.254 | FALSE | TRUE | Converged |
| RhE  | Ee     | IL 12P40    | 0.95 (0.64 -1.43)   | 0.813 | 0.883 | FALSE | TRUE | Converged |
| RhE  | ee     | IL 12P40    | 1.27 (0.41 -3.88)   | 0.676 | 0.883 | FALSE | TRUE | Converged |
| RhE  | Ee     | IL 15       | 0.75 (0.53 -1.06)   | 0.106 | 0.262 | FALSE | TRUE | Converged |
| RhE  | ee     | IL 15       | 1.09 (0.40 -2.94)   | 0.867 | 0.262 | FALSE | TRUE | Converged |
| RhE  | Ee     | IL 1A       | 0.80 (0.58 -1.12)   | 0.193 | 0.422 | FALSE | TRUE | Converged |
| RhE  | ee     | IL 1A       | 1.05 (0.40 -2.74)   | 0.922 | 0.422 | FALSE | TRUE | Converged |
| RhE  | Ee     | IL 1B       | 8.64 (0.91 -82.48)  | 0.061 | 0.000 | FALSE | TRUE | Converged |
| RhE  | ee     | IL 1B       | -                   | 0.000 | 0.000 | FALSE | TRUE | Converged |
| RhE  | Ee     | IL 1RA      | -                   | 0.000 | 0.000 | FALSE | TRUE | Converged |
| RhE  | ee     | IL 1RA      | 0.00 (0.00 -0.00)   | 0.000 | 0.000 | FALSE | TRUE | Converged |
| RhE  | Ee     | IL 2        | 0.89 (0.66 -1.20)   | 0.455 | 0.719 | FALSE | TRUE | Converged |
| RhE  | ee     | IL 2        | 1.13 (0.47 -2.73)   | 0.790 | 0.719 | FALSE | TRUE | Converged |
| RhE  | Ee     | IL 29 IFNL1 | 0.81 (0.55 -1.18)   | 0.267 | 0.307 | FALSE | TRUE | Converged |
| RhE  | ee     | IL 29 IFNL1 | 1.81 (0.57 -5.74)   | 0.315 | 0.307 | FALSE | TRUE | Converged |
| RhE  | Ee     | IL 33       | 0.94 (0.77 -1.16)   | 0.584 | 0.494 | FALSE | TRUE | Converged |
| RhE  | ee     | IL 33       | 1.44 (0.71 -2.92)   | 0.308 | 0.494 | FALSE | TRUE | Converged |
| RhE  | Ee     | IL 4        | 0.95 (0.61 -1.50)   | 0.836 | 0.976 | FALSE | TRUE | Converged |
| RhE  | ee     | IL 4        | 1.05 (0.20 -5.58)   | 0.954 | 0.976 | FALSE | TRUE | Converged |
| RhE  | Ee     | IL 5        | 8.13 (0.20 -334.98) | 0.269 | 0.203 | FALSE | TRUE | Converged |
| RhE  | ee     | IL 5        | 0.14 (0.01 -2.14)   | 0.159 | 0.203 | FALSE | TRUE | Converged |
| RhE  | Ee     | IL 6        | -                   | 0.000 | 0.000 | FALSE | TRUE | Converged |
| RhE  | ee     | IL 6        | 0.00 (0.00 -0.00)   | 0.000 | 0.000 | FALSE | TRUE | Converged |
| RhE  | Ee     | IL 7        | 1.17 (0.56 -2.43)   | 0.675 | 0.683 | FALSE | TRUE | Converged |
| RhE  | ee     | IL 7        | 0.35 (0.02 -5.80)   | 0.462 | 0.683 | FALSE | TRUE | Converged |
| RhE  | Ee     | MCP 3       | 1.00 (0.88 -1.13)   | 1.000 | 1.000 | FALSE | TRUE | Converged |
| RhE  | ee     | MCP 3       | 1.00 (0.68 -1.47)   | 1.000 | 1.000 | FALSE | TRUE | Converged |
| RhE  | Ee     | MIP 1A      | 1.17 (0.75 -1.82)   | 0.502 | 0.787 | FALSE | TRUE | Converged |
| RhE  | ee     | MIP 1A      | 1.15 (0.32 -4.21)   | 0.828 | 0.787 | FALSE | TRUE | Converged |
| RhE  | Ee     | PYY         | -                   | 0.000 | 0.000 | FALSE | TRUE | Converged |
| RhE  | ee     | PYY         | 0.15 (0.03 -0.86)   | 0.034 | 0.000 | FALSE | TRUE | Converged |
| RhE  | Ee     | SCF         | 0.88 (0.73 -1.06)   | 0.193 | 0.188 | FALSE | TRUE | Converged |
| RhE  | ee     | SCF         | 0.62 (0.31 -1.24)   | 0.175 | 0.188 | FALSE | TRUE | Converged |
| RhE  | Ee     | TNFB        | 0.92 (0.76 -1.11)   | 0.397 | 0.277 | FALSE | TRUE | Converged |
| RhE  | ee     | TNFB        | 0.57 (0.26 -1.25)   | 0.161 | 0.277 | FALSE | TRUE | Converged |
| RhE  | Ee     | TSLP        | 0.80 (0.64 -1.01)   | 0.061 | 0.122 | FALSE | TRUE | Converged |
| RhE  | ee     | TSLP        | 0.65 (0.26 -1.61)   | 0.353 | 0.122 | FALSE | TRUE | Converged |
| RhE  | Ee     | SCD40L      | 1.24 (0.92 -1.68)   | 0.155 | 0.108 | FALSE | TRUE | Converged |
| RhE  | ee     | SCD40L      | 2.40 (0.84 -6.84)   | 0.103 | 0.108 | FALSE | TRUE | Converged |
| Kidd | JkA+B+ | FGF 2       | 0.92 (0.78 -1.08)   | 0.313 | 0.531 | FALSE | TRUE | Converged |
| Kidd | JkA-B+ | FGF 2       | 0.98 (0.81 -1.19)   | 0.875 | 0.531 | FALSE | TRUE | Converged |
| Kidd | JkA+B+ | FLT 3L      | 0.61 (0.35 -1.09)   | 0.093 | 0.245 | FALSE | TRUE | Converged |
| Kidd | JkA-B+ | FLT 3L      | 0.76 (0.40 -1.44)   | 0.407 | 0.245 | FALSE | TRUE | Converged |
| Kidd | JkA+B+ | GLP 1       | 1.16 (0.80 -1.68)   | 0.430 | 0.350 | FALSE | TRUE | Converged |
| Kidd | JkA-B+ | GLP 1       | 0.87 (0.56 -1.36)   | 0.541 | 0.350 | FALSE | TRUE | Converged |
| Kidd | JkA+B+ | GLUCAGON    | 0.60 (0.37 -0.98)   | 0.039 | 0.019 | FALSE | TRUE | Converged |
| Kidd | JkA-B+ | GLUCAGON    | 1.23 (0.74 -2.04)   | 0.432 | 0.019 | FALSE | TRUE | Converged |
| Kidd | JkA+B+ | GM CSF      | 0.81 (0.55 -1.18)   | 0.268 | 0.483 | FALSE | TRUE | Converged |
| Kidd | JkA-B+ | GM CSF      | 0.97 (0.62 -1.50)   | 0.876 | 0.483 | FALSE | TRUE | Converged |
| Kidd | JkA+B+ | IFNA2       | -                   | 0.000 | 0.000 | FALSE | TRUE | Converged |
| Kidd | JkA-B+ | IFNA2       | 7.25 (3.33 -15.79)  | 0.000 | 0.000 | FALSE | TRUE | Converged |
| Kidd | JkA+B+ | IFNG        | 0.91 (0.71 -1.16)   | 0.440 | 0.544 | FALSE | TRUE | Converged |
| Kidd | JkA-B+ | IFNG        | 1.04 (0.78 -1.38)   | 0.810 | 0.544 | FALSE | TRUE | Converged |
| Kidd | JkA+B+ | IL 10       | 1.01 (0.71 -1.42)   | 0.973 | 0.993 | FALSE | TRUE | Converged |
| Kidd | JkA-B+ | IL 10       | 1.02 (0.69 -1.52)   | 0.907 | 0.993 | FALSE | TRUE | Converged |
| Kidd | JkA+B+ | IL 11       | 0.99 (0.75 -1.31)   | 0.946 | 0.665 | FALSE | TRUE | Converged |
| Kidd | JkA-B+ | IL 11       | 0.87 (0.63 -1.22)   | 0.427 | 0.665 | FALSE | TRUE | Converged |
| Kidd | JkA+B+ | IL 12P40    | 1.13 (0.79 -1.62)   | 0.511 | 0.693 | FALSE | TRUE | Converged |
| Kidd | JkA-B+ | IL 12P40    | 1.19 (0.79 -1.80)   | 0.412 | 0.693 | FALSE | TRUE | Converged |
| Kidd | JkA+B+ | IL 12P70    | 0.00 (0.00 -0.00)   | 0.000 | 0.000 | FALSE | TRUE | Converged |
| Kidd | JkA+B+ | IL 15       | 1.15 (0.85 -1.54)   | 0.369 | 0.582 | FALSE | TRUE | Converged |
| Kidd | JkA-B+ | IL 15       | 1.01 (0.72 -1.43)   | 0.948 | 0.582 | FALSE | TRUE | Converged |
| Kidd | JkA+B+ | IL 1A       | 0.96 (0.72 -1.28)   | 0.773 | 0.941 | FALSE | TRUE | Converged |

|      |        |             |                     |       |       |       |      |           |
|------|--------|-------------|---------------------|-------|-------|-------|------|-----------|
| Kidd | JkA-B+ | IL 1A       | 0.95 (0.68 - 1.33)  | 0.747 | 0.941 | FALSE | TRUE | Converged |
| Kidd | JkA+B+ | IL 1B       | 0.38 (0.08 - 1.72)  | 0.209 | 0.209 | FALSE | TRUE | Converged |
| Kidd | JkA-B+ | IL 1B       | 1.28 (0.23 - 7.09)  | 0.776 | 0.209 | FALSE | TRUE | Converged |
| Kidd | JkA+B+ | IL 1RA      | --                  | 0.000 | 0.000 | FALSE | TRUE | Converged |
| Kidd | JkA-B+ | IL 1RA      | --                  | 0.000 | 0.000 | FALSE | TRUE | Converged |
| Kidd | JkA+B+ | IL 2        | 0.84 (0.65 - 1.10)  | 0.208 | 0.331 | FALSE | TRUE | Converged |
| Kidd | JkA-B+ | IL 2        | 1.00 (0.74 - 1.35)  | 0.997 | 0.331 | FALSE | TRUE | Converged |
| Kidd | JkA+B+ | IL 29 IFNL1 | 0.92 (0.66 - 1.28)  | 0.621 | 0.555 | FALSE | TRUE | Converged |
| Kidd | JkA-B+ | IL 29 IFNL1 | 1.10 (0.76 - 1.60)  | 0.611 | 0.555 | FALSE | TRUE | Converged |
| Kidd | JkA+B+ | IL 33       | 0.88 (0.74 - 1.05)  | 0.160 | 0.099 | FALSE | TRUE | Converged |
| Kidd | JkA-B+ | IL 33       | 0.79 (0.64 - 0.98)  | 0.033 | 0.099 | FALSE | TRUE | Converged |
| Kidd | JkA+B+ | IL 4        | 1.00 (0.65 - 1.54)  | 0.996 | 0.997 | FALSE | TRUE | Converged |
| Kidd | JkA-B+ | IL 4        | 0.98 (0.60 - 1.61)  | 0.949 | 0.997 | FALSE | TRUE | Converged |
| Kidd | JkA+B+ | IL 5        | 0.72 (0.13 - 3.99)  | 0.702 | 0.733 | FALSE | TRUE | Converged |
| Kidd | JkA-B+ | IL 5        | 0.52 (0.09 - 2.92)  | 0.458 | 0.733 | FALSE | TRUE | Converged |
| Kidd | JkA+B+ | IL 7        | 1.25 (0.65 - 2.40)  | 0.512 | 0.746 | FALSE | TRUE | Converged |
| Kidd | JkA-B+ | IL 7        | 1.31 (0.62 - 2.78)  | 0.479 | 0.746 | FALSE | TRUE | Converged |
| Kidd | JkA+B+ | MCP 3       | 0.00 (0.00 - 0.00)  | 0.000 | 0.000 | FALSE | TRUE | Converged |
| Kidd | JkA-B+ | MCP 3       | 0.00 (0.00 - 0.00)  | 0.000 | 0.000 | FALSE | TRUE | Converged |
| Kidd | JkA+B+ | MIP 1A      | 0.79 (0.53 - 1.18)  | 0.241 | 0.128 | FALSE | TRUE | Converged |
| Kidd | JkA-B+ | MIP 1A      | 1.21 (0.77 - 1.92)  | 0.405 | 0.128 | FALSE | TRUE | Converged |
| Kidd | JkA+B+ | PYY         | 1.47 (0.14 - 15.26) | 0.746 | 0.000 | FALSE | TRUE | Converged |
| Kidd | JkA-B+ | PYY         | 0.00 (0.00 - 0.00)  | 0.000 | 0.000 | FALSE | TRUE | Converged |
| Kidd | JkA+B+ | SCF         | 0.88 (0.75 - 1.04)  | 0.133 | 0.217 | FALSE | TRUE | Converged |
| Kidd | JkA-B+ | SCF         | 0.86 (0.71 - 1.04)  | 0.117 | 0.217 | FALSE | TRUE | Converged |
| Kidd | JkA+B+ | SIL 2RA     | 0.88 (0.55 - 1.42)  | 0.604 | 0.738 | FALSE | TRUE | Converged |
| Kidd | JkA-B+ | SIL 2RA     | 1.05 (0.61 - 1.82)  | 0.855 | 0.738 | FALSE | TRUE | Converged |
| Kidd | JkA+B+ | TNF B       | 0.81 (0.69 - 0.96)  | 0.016 | 0.054 | FALSE | TRUE | Converged |
| Kidd | JkA-B+ | TNF B       | 0.88 (0.73 - 1.07)  | 0.192 | 0.054 | FALSE | TRUE | Converged |
| Kidd | JkA+B+ | TSLP        | 1.12 (0.92 - 1.36)  | 0.271 | 0.539 | FALSE | TRUE | Converged |
| Kidd | JkA-B+ | TSLP        | 1.06 (0.84 - 1.34)  | 0.620 | 0.539 | FALSE | TRUE | Converged |
| Kidd | JkA+B+ | SCD40L      | 0.90 (0.69 - 1.18)  | 0.456 | 0.690 | FALSE | TRUE | Converged |
| Kidd | JkA-B+ | SCD40L      | 0.89 (0.65 - 1.20)  | 0.440 | 0.690 | FALSE | TRUE | Converged |
| Aub  | AuA-B+ | FGF 2       | 0.82 (0.61 - 1.09)  | 0.168 | 0.383 | FALSE | TRUE | Converged |
| Aub  | AuA+B+ | FGF 2       | 0.99 (0.85 - 1.15)  | 0.859 | 0.383 | FALSE | TRUE | Converged |
| Aub  | AuA-B+ | FLT 3L      | 1.34 (0.56 - 3.21)  | 0.508 | 0.731 | FALSE | TRUE | Converged |
| Aub  | AuA+B+ | FLT 3L      | 0.94 (0.54 - 1.61)  | 0.809 | 0.731 | FALSE | TRUE | Converged |
| Aub  | AuA-B+ | GLP 1       | 1.02 (0.53 - 1.94)  | 0.962 | 0.283 | FALSE | TRUE | Converged |
| Aub  | AuA+B+ | GLP 1       | 1.31 (0.93 - 1.85)  | 0.121 | 0.283 | FALSE | TRUE | Converged |
| Aub  | AuA-B+ | GLUCAGON    | 1.10 (0.47 - 2.57)  | 0.831 | 0.826 | FALSE | TRUE | Converged |
| Aub  | AuA+B+ | GLUCAGON    | 0.89 (0.57 - 1.40)  | 0.611 | 0.826 | FALSE | TRUE | Converged |
| Aub  | AuA-B+ | GM CSF      | 1.43 (0.75 - 2.72)  | 0.272 | 0.445 | FALSE | TRUE | Converged |
| Aub  | AuA+B+ | GM CSF      | 0.94 (0.67 - 1.33)  | 0.738 | 0.445 | FALSE | TRUE | Converged |
| Aub  | AuA-B+ | IFNA2       | 0.00 (0.00 - 0.00)  | 0.000 | 0.000 | FALSE | TRUE | Converged |
| Aub  | AuA+B+ | IFNA2       | 0.00 (0.00 - 0.00)  | 0.000 | 0.000 | FALSE | TRUE | Converged |
| Aub  | AuA-B+ | IFNG        | 1.38 (0.89 - 2.13)  | 0.145 | 0.003 | FALSE | TRUE | Converged |
| Aub  | AuA+B+ | IFNG        | 1.47 (1.17 - 1.84)  | 0.001 | 0.003 | FALSE | TRUE | Converged |
| Aub  | AuA-B+ | IL 10       | 0.68 (0.35 - 1.32)  | 0.259 | 0.009 | FALSE | TRUE | Converged |
| Aub  | AuA+B+ | IL 10       | 1.51 (1.11 - 2.07)  | 0.010 | 0.009 | FALSE | TRUE | Converged |
| Aub  | AuA-B+ | IL 11       | 0.71 (0.41 - 1.22)  | 0.211 | 0.208 | FALSE | TRUE | Converged |
| Aub  | AuA+B+ | IL 11       | 1.13 (0.88 - 1.46)  | 0.339 | 0.208 | FALSE | TRUE | Converged |
| Aub  | AuA-B+ | IL 12P40    | 0.99 (0.54 - 1.84)  | 0.985 | 0.234 | FALSE | TRUE | Converged |
| Aub  | AuA+B+ | IL 12P40    | 1.32 (0.95 - 1.83)  | 0.102 | 0.234 | FALSE | TRUE | Converged |
| Aub  | AuA-B+ | IL 12P70    | 0.11 (0.01 - 1.61)  | 0.106 | 0.049 | FALSE | TRUE | Converged |
| Aub  | AuA+B+ | IL 12P70    | 5.05 (0.68 - 37.71) | 0.114 | 0.049 | FALSE | TRUE | Converged |
| Aub  | AuA-B+ | IL 15       | 0.87 (0.51 - 1.48)  | 0.614 | 0.531 | FALSE | TRUE | Converged |
| Aub  | AuA+B+ | IL 15       | 1.13 (0.86 - 1.47)  | 0.385 | 0.531 | FALSE | TRUE | Converged |
| Aub  | AuA-B+ | IL 1A       | 0.90 (0.53 - 1.53)  | 0.697 | 0.133 | FALSE | TRUE | Converged |
| Aub  | AuA+B+ | IL 1A       | 1.28 (0.98 - 1.66)  | 0.068 | 0.133 | FALSE | TRUE | Converged |
| Aub  | AuA-B+ | IL 1B       | 1.21 (0.03 - 53.88) | 0.922 | 0.916 | FALSE | TRUE | Converged |
| Aub  | AuA+B+ | IL 1B       | 1.26 (0.42 - 3.81)  | 0.683 | 0.916 | FALSE | TRUE | Converged |
| Aub  | AuA-B+ | IL 1RA      | 0.00 (0.00 - 0.00)  | 0.000 | 0.000 | FALSE | TRUE | Converged |
| Aub  | AuA+B+ | IL 1RA      | 0.00 (0.00 - 0.00)  | 0.000 | 0.000 | FALSE | TRUE | Converged |
| Aub  | AuA-B+ | IL 2        | 0.81 (0.50 - 1.33)  | 0.412 | 0.022 | FALSE | TRUE | Converged |
| Aub  | AuA+B+ | IL 2        | 1.34 (1.05 - 1.71)  | 0.017 | 0.022 | FALSE | TRUE | Converged |
| Aub  | AuA-B+ | IL 29 IFNL1 | 0.56 (0.27 - 1.16)  | 0.119 | 0.033 | FALSE | TRUE | Converged |
| Aub  | AuA+B+ | IL 29 IFNL1 | 1.30 (0.98 - 1.72)  | 0.073 | 0.033 | FALSE | TRUE | Converged |
| Aub  | AuA-B+ | IL 33       | 0.92 (0.67 - 1.27)  | 0.619 | 0.718 | FALSE | TRUE | Converged |
| Aub  | AuA+B+ | IL 33       | 1.04 (0.89 - 1.23)  | 0.604 | 0.718 | FALSE | TRUE | Converged |
| Aub  | AuA-B+ | IL 4        | 0.72 (0.31 - 1.68)  | 0.447 | 0.319 | FALSE | TRUE | Converged |
| Aub  | AuA+B+ | IL 4        | 1.25 (0.85 - 1.83)  | 0.259 | 0.319 | FALSE | TRUE | Converged |
| Aub  | AuA-B+ | IL 5        | --                  | 0.000 | 0.000 | FALSE | TRUE | Converged |
| Aub  | AuA+B+ | IL 5        | 0.62 (0.17 - 2.26)  | 0.470 | 0.000 | FALSE | TRUE | Converged |



|       |        |             |                     |       |       |       |      |           |
|-------|--------|-------------|---------------------|-------|-------|-------|------|-----------|
| Aub   | AuA-B+ | IL 7        | 0.64 (0.24 - 1.71)  | 0.370 | 0.656 | FALSE | TRUE | Converged |
| Aub   | AuA+B+ | IL 7        | 0.99 (0.55 - 1.80)  | 0.978 | 0.656 | FALSE | TRUE | Converged |
| Aub   | AuA-B+ | MCP 3       | 4.58 (0.66 - 31.57) | 0.122 | 0.000 | FALSE | TRUE | Converged |
| Aub   | AuA+B+ | MCP 3       | -                   | 0.000 | 0.000 | FALSE | TRUE | Converged |
| Aub   | AuA-B+ | MIP 1A      | 0.97 (0.45 - 2.10)  | 0.937 | 0.001 | FALSE | TRUE | Converged |
| Aub   | AuA+B+ | MIP 1A      | 1.99 (1.37 - 2.89)  | 0.000 | 0.001 | FALSE | TRUE | Converged |
| Aub   | AuA-B+ | PYY         | -                   | 0.000 | 0.000 | FALSE | TRUE | Converged |
| Aub   | AuA+B+ | PYY         | 0.00 (0.00 - 0.00)  | 0.000 | 0.000 | FALSE | TRUE | Converged |
| Aub   | AuA-B+ | SCF         | 1.09 (0.81 - 1.46)  | 0.573 | 0.659 | FALSE | TRUE | Converged |
| Aub   | AuA+B+ | SCF         | 0.96 (0.82 - 1.11)  | 0.566 | 0.659 | FALSE | TRUE | Converged |
| Aub   | AuA-B+ | SIL 2RA     | 1.02 (0.42 - 2.47)  | 0.971 | 0.482 | FALSE | TRUE | Converged |
| Aub   | AuA+B+ | SIL 2RA     | 1.30 (0.84 - 2.01)  | 0.237 | 0.482 | FALSE | TRUE | Converged |
| Aub   | AuA-B+ | TNF B       | 0.82 (0.61 - 1.11)  | 0.204 | 0.447 | FALSE | TRUE | Converged |
| Aub   | AuA+B+ | TNF B       | 0.97 (0.84 - 1.14)  | 0.744 | 0.447 | FALSE | TRUE | Converged |
| Aub   | AuA-B+ | TSLP        | 0.95 (0.67 - 1.35)  | 0.781 | 0.729 | FALSE | TRUE | Converged |
| Aub   | AuA+B+ | TSLP        | 0.93 (0.78 - 1.11)  | 0.432 | 0.729 | FALSE | TRUE | Converged |
| Aub   | AuA-B+ | SCD40L      | 1.28 (0.79 - 2.06)  | 0.316 | 0.098 | FALSE | TRUE | Converged |
| Aub   | AuA+B+ | SCD40L      | 1.30 (1.01 - 1.65)  | 0.038 | 0.098 | FALSE | TRUE | Converged |
| Duffy | FYA-B+ | FGF 2       | 0.96 (0.82 - 1.16)  | 0.693 | 0.864 | FALSE | TRUE | Converged |
| Duffy | FYA-B+ | FGF 2       | 0.95 (0.78 - 1.16)  | 0.593 | 0.864 | FALSE | TRUE | Converged |
| Duffy | FYA+B+ | FLT 3L      | 0.46 (0.24 - 0.87)  | 0.018 | 0.051 | FALSE | TRUE | Converged |
| Duffy | FYA-B+ | FLT 3L      | 0.76 (0.40 - 1.47)  | 0.418 | 0.051 | FALSE | TRUE | Converged |
| Duffy | FYA+B+ | GLP 1       | 1.00 (0.65 - 1.54)  | 0.983 | 0.395 | FALSE | TRUE | Converged |
| Duffy | FYA-B+ | GLP 1       | 1.28 (0.81 - 2.01)  | 0.288 | 0.395 | FALSE | TRUE | Converged |
| Duffy | FYA+B+ | GLUCAGON    | 0.69 (0.39 - 1.21)  | 0.197 | 0.136 | FALSE | TRUE | Converged |
| Duffy | FYA-B+ | GLUCAGON    | 1.10 (0.61 - 1.99)  | 0.749 | 0.136 | FALSE | TRUE | Converged |
| Duffy | FYA+B+ | GM CSF      | 0.92 (0.60 - 1.42)  | 0.714 | 0.579 | FALSE | TRUE | Converged |
| Duffy | FYA-B+ | GM CSF      | 0.79 (0.49 - 1.26)  | 0.324 | 0.579 | FALSE | TRUE | Converged |
| Duffy | FYA+B+ | IFNA2       | -                   | 0.000 | 0.000 | FALSE | TRUE | Converged |
| Duffy | FYA-B+ | IFNA2       | 0.00 (0.00 - 0.00)  | 0.000 | 0.000 | FALSE | TRUE | Converged |
| Duffy | FYA+B+ | IFNG        | 0.83 (0.63 - 1.09)  | 0.182 | 0.104 | FALSE | TRUE | Converged |
| Duffy | FYA-B+ | IFNG        | 0.72 (0.54 - 0.97)  | 0.033 | 0.104 | FALSE | TRUE | Converged |
| Duffy | FYA+B+ | IL 10       | 1.34 (0.88 - 2.02)  | 0.169 | 0.384 | FALSE | TRUE | Converged |
| Duffy | FYA-B+ | IL 10       | 1.25 (0.81 - 1.93)  | 0.306 | 0.384 | FALSE | TRUE | Converged |
| Duffy | FYA+B+ | IL 11       | 0.78 (0.57 - 1.07)  | 0.120 | 0.205 | FALSE | TRUE | Converged |
| Duffy | FYA-B+ | IL 11       | 0.76 (0.54 - 1.06)  | 0.101 | 0.205 | FALSE | TRUE | Converged |
| Duffy | FYA+B+ | IL 12P40    | 1.07 (0.71 - 1.62)  | 0.745 | 0.894 | FALSE | TRUE | Converged |
| Duffy | FYA-B+ | IL 12P40    | 1.11 (0.71 - 1.74)  | 0.636 | 0.894 | FALSE | TRUE | Converged |
| Duffy | FYA+B+ | IL 12P70    | 0.66 (0.04 - 11.01) | 0.774 | 0.891 | FALSE | TRUE | Converged |
| Duffy | FYA-B+ | IL 12P70    | 0.47 (0.02 - 10.11) | 0.632 | 0.891 | FALSE | TRUE | Converged |
| Duffy | FYA+B+ | IL 15       | 0.95 (0.67 - 1.33)  | 0.756 | 0.228 | FALSE | TRUE | Converged |
| Duffy | FYA-B+ | IL 15       | 1.22 (0.85 - 1.73)  | 0.279 | 0.228 | FALSE | TRUE | Converged |
| Duffy | FYA+B+ | IL 1A       | 1.22 (0.86 - 1.73)  | 0.259 | 0.281 | FALSE | TRUE | Converged |
| Duffy | FYA-B+ | IL 1A       | 1.35 (0.93 - 1.95)  | 0.111 | 0.281 | FALSE | TRUE | Converged |
| Duffy | FYA+B+ | IL 1B       | 1.08 (0.19 - 6.30)  | 0.930 | 0.641 | FALSE | TRUE | Converged |
| Duffy | FYA-B+ | IL 1B       | 0.58 (0.10 - 3.42)  | 0.550 | 0.641 | FALSE | TRUE | Converged |
| Duffy | FYA+B+ | IL 1RA      | 0.00 (0.00 - 0.00)  | 0.000 | 0.000 | FALSE | TRUE | Converged |
| Duffy | FYA-B+ | IL 1RA      | 0.00 (0.00 - 0.00)  | 0.000 | 0.000 | FALSE | TRUE | Converged |
| Duffy | FYA+B+ | IL 2        | 0.83 (0.61 - 1.12)  | 0.216 | 0.380 | FALSE | TRUE | Converged |
| Duffy | FYA-B+ | IL 2        | 0.96 (0.70 - 1.31)  | 0.780 | 0.380 | FALSE | TRUE | Converged |
| Duffy | FYA+B+ | IL 29 IFNL1 | 1.23 (0.85 - 1.78)  | 0.281 | 0.238 | FALSE | TRUE | Converged |
| Duffy | FYA-B+ | IL 29 IFNL1 | 0.94 (0.62 - 1.41)  | 0.756 | 0.238 | FALSE | TRUE | Converged |
| Duffy | FYA+B+ | IL 33       | 0.94 (0.76 - 1.15)  | 0.521 | 0.626 | FALSE | TRUE | Converged |
| Duffy | FYA-B+ | IL 33       | 0.90 (0.72 - 1.12)  | 0.333 | 0.626 | FALSE | TRUE | Converged |
| Duffy | FYA+B+ | IL 4        | 0.83 (0.52 - 1.33)  | 0.451 | 0.753 | FALSE | TRUE | Converged |
| Duffy | FYA-B+ | IL 4        | 0.89 (0.55 - 1.44)  | 0.638 | 0.753 | FALSE | TRUE | Converged |
| Duffy | FYA+B+ | IL 5        | 1.71 (0.40 - 7.29)  | 0.465 | 0.144 | FALSE | TRUE | Converged |
| Duffy | FYA-B+ | IL 5        | 7.06 (1.00 - 49.72) | 0.050 | 0.144 | FALSE | TRUE | Converged |
| Duffy | FYA+B+ | IL 6        | 0.00 (0.00 - 0.00)  | 0.000 | 0.000 | FALSE | TRUE | Converged |
| Duffy | FYA+B+ | IL 7        | 0.50 (0.24 - 1.02)  | 0.056 | 0.156 | FALSE | TRUE | Converged |
| Duffy | FYA-B+ | IL 7        | 0.59 (0.28 - 1.25)  | 0.170 | 0.156 | FALSE | TRUE | Converged |
| Duffy | FYA+B+ | MIP 1A      | 0.78 (0.50 - 1.22)  | 0.275 | 0.551 | FALSE | TRUE | Converged |
| Duffy | FYA-B+ | MIP 1A      | 0.84 (0.52 - 1.38)  | 0.496 | 0.551 | FALSE | TRUE | Converged |
| Duffy | FYA+B+ | SCF         | 0.83 (0.69 - 1.00)  | 0.049 | 0.056 | FALSE | TRUE | Converged |
| Duffy | FYA-B+ | SCF         | 0.98 (0.81 - 1.20)  | 0.878 | 0.056 | FALSE | TRUE | Converged |
| Duffy | FYA+B+ | SIL 2RA     | 0.78 (0.46 - 1.30)  | 0.336 | 0.416 | FALSE | TRUE | Converged |
| Duffy | FYA-B+ | SIL 2RA     | 0.68 (0.39 - 1.22)  | 0.197 | 0.416 | FALSE | TRUE | Converged |
| Duffy | FYA+B+ | TNF B       | 0.97 (0.80 - 1.17)  | 0.740 | 0.747 | FALSE | TRUE | Converged |
| Duffy | FYA-B+ | TNF B       | 1.03 (0.84 - 1.27)  | 0.755 | 0.747 | FALSE | TRUE | Converged |
| Duffy | FYA+B+ | TSLP        | 0.90 (0.72 - 1.13)  | 0.364 | 0.345 | FALSE | TRUE | Converged |
| Duffy | FYA-B+ | TSLP        | 0.84 (0.66 - 1.06)  | 0.145 | 0.345 | FALSE | TRUE | Converged |
| Duffy | FYA+B+ | SCD40L      | 0.97 (0.71 - 1.31)  | 0.830 | 0.884 | FALSE | TRUE | Converged |
| Duffy | FYA-B+ | SCD40L      | 0.92 (0.67 - 1.27)  | 0.630 | 0.884 | FALSE | TRUE | Converged |

|       |      |             |                    |       |       |       |      |           |
|-------|------|-------------|--------------------|-------|-------|-------|------|-----------|
| Lewis | LeA+ | FGF 2       | 1.01 (0.83 -1.22)  | 0.957 | 0.957 | FALSE | TRUE | Converged |
| Lewis | LeA+ | FLT 3L      | 1.33 (0.67 -2.65)  | 0.410 | 0.410 | FALSE | TRUE | Converged |
| Lewis | LeA+ | FRACTALKINE | 0.00 (0.00 -0.00)  | 0.000 | 0.000 | FALSE | TRUE | Converged |
| Lewis | LeA+ | GLP 1       | 1.54 (1.03 -2.30)  | 0.036 | 0.036 | FALSE | TRUE | Converged |
| Lewis | LeA+ | GLUCAGON    | 1.64 (0.96 -2.79)  | 0.068 | 0.068 | FALSE | TRUE | Converged |
| Lewis | LeA+ | GM CSF      | 0.83 (0.54 -1.30)  | 0.420 | 0.420 | FALSE | TRUE | Converged |
| Lewis | LeA+ | IFNA2       | -                  | 0.000 | 0.000 | FALSE | TRUE | Converged |
| Lewis | LeA+ | IFNG        | 1.03 (0.77 -1.37)  | 0.864 | 0.864 | FALSE | TRUE | Converged |
| Lewis | LeA+ | IL 10       | 1.18 (0.78 -1.78)  | 0.429 | 0.429 | FALSE | TRUE | Converged |
| Lewis | LeA+ | IL 11       | 1.17 (0.85 -1.62)  | 0.339 | 0.340 | FALSE | TRUE | Converged |
| Lewis | LeA+ | IL 12P40    | 0.46 (0.28 -0.75)  | 0.002 | 0.002 | FALSE | TRUE | Converged |
| Lewis | LeA+ | IL 15       | 0.70 (0.48 -1.01)  | 0.060 | 0.060 | FALSE | TRUE | Converged |
| Lewis | LeA+ | IL 1A       | 0.72 (0.50 -1.03)  | 0.072 | 0.072 | FALSE | TRUE | Converged |
| Lewis | LeA+ | IL 1B       | 0.44 (0.06 -3.17)  | 0.415 | 0.416 | FALSE | TRUE | Converged |
| Lewis | LeA+ | IL 1RA      | -                  | 0.000 | 0.000 | FALSE | TRUE | Converged |
| Lewis | LeA+ | IL 2        | 0.83 (0.60 -1.14)  | 0.246 | 0.246 | FALSE | TRUE | Converged |
| Lewis | LeA+ | IL 29 IFNL1 | 1.07 (0.72 -1.61)  | 0.734 | 0.734 | FALSE | TRUE | Converged |
| Lewis | LeA+ | IL 33       | 0.93 (0.75 -1.15)  | 0.496 | 0.496 | FALSE | TRUE | Converged |
| Lewis | LeA+ | IL 4        | 1.18 (0.73 -1.91)  | 0.491 | 0.491 | FALSE | TRUE | Converged |
| Lewis | LeA+ | IL 5        | 0.67 (0.07 -6.54)  | 0.728 | 0.728 | FALSE | TRUE | Converged |
| Lewis | LeA+ | IL 6        | 0.00 (0.00 -0.00)  | 0.000 | 0.000 | FALSE | TRUE | Converged |
| Lewis | LeA+ | IL 7        | 1.31 (0.65 -2.63)  | 0.453 | 0.453 | FALSE | TRUE | Converged |
| Lewis | LeA+ | MCP 3       | 1.00 (0.88 -1.14)  | 1.000 | 1.000 | FALSE | TRUE | Converged |
| Lewis | LeA+ | MIP 1A      | 1.57 (0.98 -2.53)  | 0.062 | 0.062 | FALSE | TRUE | Converged |
| Lewis | LeA+ | PYY         | 0.66 (0.26 -1.71)  | 0.393 | 0.394 | FALSE | TRUE | Converged |
| Lewis | LeA+ | SCF         | 1.12 (0.92 -1.35)  | 0.264 | 0.264 | FALSE | TRUE | Converged |
| Lewis | LeA+ | SIL 2RA     | 1.43 (0.86 -2.37)  | 0.165 | 0.165 | FALSE | TRUE | Converged |
| Lewis | LeA+ | TNF B       | 0.92 (0.75 -1.12)  | 0.410 | 0.410 | FALSE | TRUE | Converged |
| Lewis | LeA+ | TSLP        | 0.91 (0.72 -1.15)  | 0.436 | 0.436 | FALSE | TRUE | Converged |
| Lewis | LeA+ | SCD40L      | 0.96 (0.71 -1.31)  | 0.808 | 0.808 | FALSE | TRUE | Converged |
| ABO   | abA  | FGF 2       | 1.16 (1.00 -1.35)  | 0.047 | 0.128 | FALSE | TRUE | Converged |
| ABO   | abAB | FGF 2       | 1.22 (0.89 -1.68)  | 0.217 | 0.128 | FALSE | TRUE | Converged |
| ABO   | abB  | FGF 2       | 0.97 (0.78 -1.21)  | 0.821 | 0.128 | FALSE | TRUE | Converged |
| ABO   | abA  | FLT 3L      | 0.75 (0.42 -1.31)  | 0.310 | 0.743 | FALSE | TRUE | Converged |
| ABO   | abAB | FLT 3L      | 0.98 (0.28 -3.40)  | 0.974 | 0.743 | FALSE | TRUE | Converged |
| ABO   | abB  | FLT 3L      | 1.01 (0.48 -2.12)  | 0.978 | 0.743 | FALSE | TRUE | Converged |
| ABO   | abA  | GLP 1       | 0.77 (0.54 -1.11)  | 0.158 | 0.198 | FALSE | TRUE | Converged |
| ABO   | abAB | GLP 1       | 1.49 (0.74 -2.99)  | 0.267 | 0.198 | FALSE | TRUE | Converged |
| ABO   | abB  | GLP 1       | 1.03 (0.63 -1.68)  | 0.920 | 0.198 | FALSE | TRUE | Converged |
| ABO   | abA  | GLUCAGON    | 0.47 (0.30 -0.75)  | 0.002 | 0.017 | FALSE | TRUE | Converged |
| ABO   | abAB | GLUCAGON    | 0.50 (0.13 -1.94)  | 0.319 | 0.017 | FALSE | TRUE | Converged |
| ABO   | abB  | GLUCAGON    | 0.73 (0.38 -1.40)  | 0.345 | 0.017 | FALSE | TRUE | Converged |
| ABO   | abA  | GM CSF      | 0.84 (0.59 -1.19)  | 0.324 | 0.635 | FALSE | TRUE | Converged |
| ABO   | abAB | GM CSF      | 0.60 (0.23 -1.59)  | 0.307 | 0.635 | FALSE | TRUE | Converged |
| ABO   | abB  | GM CSF      | 0.88 (0.53 -1.47)  | 0.632 | 0.635 | FALSE | TRUE | Converged |
| ABO   | abA  | IFNA2       | 0.00 (0.00 -0.00)  | 0.000 | 0.000 | FALSE | TRUE | Converged |
| ABO   | abAB | IFNA2       | -                  | 0.000 | 0.000 | FALSE | TRUE | Converged |
| ABO   | abB  | IFNA2       | 0.00 (0.00 -0.00)  | 0.000 | 0.000 | FALSE | TRUE | Converged |
| ABO   | abA  | IFNG        | 1.31 (1.05 -1.64)  | 0.019 | 0.023 | FALSE | TRUE | Converged |
| ABO   | abAB | IFNG        | 1.16 (0.70 -1.91)  | 0.573 | 0.023 | FALSE | TRUE | Converged |
| ABO   | abB  | IFNG        | 0.82 (0.58 -1.16)  | 0.266 | 0.023 | FALSE | TRUE | Converged |
| ABO   | abA  | IL 10       | 1.07 (0.78 -1.47)  | 0.662 | 0.909 | FALSE | TRUE | Converged |
| ABO   | abAB | IL 10       | 0.90 (0.46 -1.76)  | 0.754 | 0.909 | FALSE | TRUE | Converged |
| ABO   | abB  | IL 10       | 0.94 (0.58 -1.52)  | 0.793 | 0.909 | FALSE | TRUE | Converged |
| ABO   | abA  | IL 11       | 0.92 (0.71 -1.19)  | 0.520 | 0.513 | FALSE | TRUE | Converged |
| ABO   | abAB | IL 11       | 0.72 (0.38 -1.33)  | 0.291 | 0.513 | FALSE | TRUE | Converged |
| ABO   | abB  | IL 11       | 0.78 (0.52 -1.16)  | 0.224 | 0.513 | FALSE | TRUE | Converged |
| ABO   | abA  | IL 12P40    | 1.91 (1.35 -2.71)  | 0.000 | 0.001 | FALSE | TRUE | Converged |
| ABO   | abAB | IL 12P40    | 0.96 (0.41 -2.23)  | 0.921 | 0.001 | FALSE | TRUE | Converged |
| ABO   | abB  | IL 12P40    | 1.00 (0.60 -1.69)  | 0.986 | 0.001 | FALSE | TRUE | Converged |
| ABO   | abA  | IL 12P70    | 6.22 (0.53 -72.44) | 0.144 | 0.000 | FALSE | TRUE | Converged |
| ABO   | abAB | IL 12P70    | -                  | 0.000 | 0.000 | FALSE | TRUE | Converged |
| ABO   | abB  | IL 12P70    | 0.01 (0.00 -1.66)  | 0.079 | 0.000 | FALSE | TRUE | Converged |
| ABO   | abA  | IL 15       | 1.03 (0.79 -1.35)  | 0.822 | 0.576 | FALSE | TRUE | Converged |
| ABO   | abAB | IL 15       | 0.75 (0.39 -1.46)  | 0.398 | 0.576 | FALSE | TRUE | Converged |
| ABO   | abB  | IL 15       | 0.81 (0.53 -1.24)  | 0.331 | 0.576 | FALSE | TRUE | Converged |
| ABO   | abA  | IL 1A       | 1.12 (0.85 -1.48)  | 0.405 | 0.864 | FALSE | TRUE | Converged |
| ABO   | abAB | IL 1A       | 1.00 (0.54 -1.87)  | 0.988 | 0.864 | FALSE | TRUE | Converged |
| ABO   | abB  | IL 1A       | 1.09 (0.73 -1.63)  | 0.686 | 0.864 | FALSE | TRUE | Converged |
| ABO   | abA  | IL 1B       | 0.93 (0.26 -3.33)  | 0.910 | 0.000 | FALSE | TRUE | Converged |
| ABO   | abAB | IL 1B       | -                  | 0.000 | 0.000 | FALSE | TRUE | Converged |
| ABO   | abB  | IL 1B       | 0.30 (0.07 -1.40)  | 0.126 | 0.000 | FALSE | TRUE | Converged |
| ABO   | abA  | IL 1RA      | 0.00 (0.00 -0.11)  | 0.010 | 0.000 | FALSE | TRUE | Converged |

|     |      |             |                          |       |       |       |      |           |
|-----|------|-------------|--------------------------|-------|-------|-------|------|-----------|
| ABO | abAB | IL 1RA      | 0.00 (0.00 - 0.00)       | 0.000 | 0.000 | FALSE | TRUE | Converged |
| ABO | abB  | IL 1RA      | 0.00 (0.00 - 20.56)      | 0.137 | 0.000 | FALSE | TRUE | Converged |
| ABO | abA  | IL 2        | 1.09 (0.86 - 1.40)       | 0.472 | 0.397 | FALSE | TRUE | Converged |
| ABO | abAB | IL 2        | 0.85 (0.48 - 1.51)       | 0.580 | 0.397 | FALSE | TRUE | Converged |
| ABO | abB  | IL 2        | 0.81 (0.55 - 1.18)       | 0.271 | 0.397 | FALSE | TRUE | Converged |
| ABO | abA  | IL 29 IFNL1 | 1.06 (0.79 - 1.42)       | 0.690 | 0.751 | FALSE | TRUE | Converged |
| ABO | abAB | IL 29 IFNL1 | 0.84 (0.45 - 1.60)       | 0.602 | 0.751 | FALSE | TRUE | Converged |
| ABO | abB  | IL 29 IFNL1 | 0.86 (0.54 - 1.35)       | 0.501 | 0.751 | FALSE | TRUE | Converged |
| ABO | abA  | IL 33       | 1.16 (0.98 - 1.37)       | 0.080 | 0.249 | FALSE | TRUE | Converged |
| ABO | abAB | IL 33       | 1.18 (0.83 - 1.67)       | 0.364 | 0.249 | FALSE | TRUE | Converged |
| ABO | abB  | IL 33       | 0.98 (0.76 - 1.25)       | 0.856 | 0.249 | FALSE | TRUE | Converged |
| ABO | abA  | IL 4        | 1.11 (0.76 - 1.63)       | 0.579 | 0.757 | FALSE | TRUE | Converged |
| ABO | abAB | IL 4        | 1.38 (0.66 - 2.89)       | 0.393 | 0.757 | FALSE | TRUE | Converged |
| ABO | abB  | IL 4        | 0.91 (0.49 - 1.70)       | 0.768 | 0.757 | FALSE | TRUE | Converged |
| ABO | abA  | IL 5        | 1.36 (0.37 - 4.94)       | 0.640 | 0.000 | FALSE | TRUE | Converged |
| ABO | abAB | IL 5        | -                        | 0.000 | 0.000 | FALSE | TRUE | Converged |
| ABO | abB  | IL 5        | 1.72 (0.27 - 11.11)      | 0.570 | 0.000 | FALSE | TRUE | Converged |
| ABO | abA  | IL 7        | 1.56 (0.85 - 2.86)       | 0.152 | 0.151 | FALSE | TRUE | Converged |
| ABO | abAB | IL 7        | 2.30 (0.71 - 7.50)       | 0.167 | 0.151 | FALSE | TRUE | Converged |
| ABO | abB  | IL 7        | 0.73 (0.30 - 1.79)       | 0.496 | 0.151 | FALSE | TRUE | Converged |
| ABO | abA  | MCP 3       | -                        | 0.000 | 0.000 | FALSE | TRUE | Converged |
| ABO | abAB | MCP 3       | 372.35 (21.23 - 6531.02) | 0.000 | 0.000 | FALSE | TRUE | Converged |
| ABO | abB  | MCP 3       | 0.00 (0.00 - 0.00)       | 0.000 | 0.000 | FALSE | TRUE | Converged |
| ABO | abA  | MIP 1A      | 0.97 (0.66 - 1.41)       | 0.857 | 0.200 | FALSE | TRUE | Converged |
| ABO | abAB | MIP 1A      | 0.44 (0.14 - 1.38)       | 0.160 | 0.200 | FALSE | TRUE | Converged |
| ABO | abB  | MIP 1A      | 0.61 (0.34 - 1.08)       | 0.091 | 0.200 | FALSE | TRUE | Converged |
| ABO | abA  | PYY         | 0.00 (0.00 - 0.00)       | 0.000 | 0.000 | FALSE | TRUE | Converged |
| ABO | abAB | PYY         | 0.00 (0.00 - 0.00)       | 0.000 | 0.000 | FALSE | TRUE | Converged |
| ABO | abB  | PYY         | 0.00 (0.00 - 0.00)       | 0.000 | 0.000 | FALSE | TRUE | Converged |
| ABO | abA  | SCF         | 0.98 (0.84 - 1.14)       | 0.827 | 0.908 | FALSE | TRUE | Converged |
| ABO | abAB | SCF         | 1.11 (0.80 - 1.54)       | 0.528 | 0.908 | FALSE | TRUE | Converged |
| ABO | abB  | SCF         | 0.99 (0.80 - 1.23)       | 0.924 | 0.908 | FALSE | TRUE | Converged |
| ABO | abA  | SIL 2RA     | 0.77 (0.50 - 1.19)       | 0.234 | 0.697 | FALSE | TRUE | Converged |
| ABO | abAB | SIL 2RA     | 0.95 (0.39 - 2.29)       | 0.910 | 0.697 | FALSE | TRUE | Converged |
| ABO | abB  | SIL 2RA     | 0.90 (0.47 - 1.72)       | 0.758 | 0.697 | FALSE | TRUE | Converged |
| ABO | abA  | TNF B       | 1.04 (0.89 - 1.21)       | 0.644 | 0.794 | FALSE | TRUE | Converged |
| ABO | abAB | TNF B       | 1.10 (0.79 - 1.54)       | 0.575 | 0.794 | FALSE | TRUE | Converged |
| ABO | abB  | TNF B       | 0.94 (0.75 - 1.18)       | 0.604 | 0.794 | FALSE | TRUE | Converged |
| ABO | abA  | TSLP        | 1.19 (0.99 - 1.42)       | 0.057 | 0.010 | FALSE | TRUE | Converged |
| ABO | abAB | TSLP        | 1.24 (0.86 - 1.80)       | 0.246 | 0.010 | FALSE | TRUE | Converged |
| ABO | abB  | TSLP        | 0.76 (0.57 - 1.02)       | 0.066 | 0.010 | FALSE | TRUE | Converged |
| ABO | abA  | SCD40L      | 1.28 (1.00 - 1.64)       | 0.049 | 0.201 | FALSE | TRUE | Converged |
| ABO | abAB | SCD40L      | 0.97 (0.56 - 1.66)       | 0.908 | 0.201 | FALSE | TRUE | Converged |
| ABO | abB  | SCD40L      | 1.26 (0.88 - 1.82)       | 0.210 | 0.201 | FALSE | TRUE | Converged |

Supplementary Table 3

| Blood Group | Allele   | Marker           | Estimate (95% CI)     | P-value | Wald Joint P-value | Bonferroni Significant? | Logistic Model | Converged? |
|-------------|----------|------------------|-----------------------|---------|--------------------|-------------------------|----------------|------------|
| Lewis       | Null     | ADIPONECTIN      | -0.03 (-0.13 - 0.07)  | 0.576   | 0.576              | FALSE                   | FALSE          | Converged  |
| Lewis       | Null     | ADIPSIN          | 0.02 (-0.01 - 0.06)   | 0.216   | 0.216              | FALSE                   | FALSE          | Converged  |
| Lewis       | Null     | AMYLIN           | 0.15 (0.01 - 0.29)    | 0.035   | 0.035              | FALSE                   | FALSE          | Converged  |
| Lewis       | Null     | BCA 1            | -0.00 (-0.06 - 0.05)  | 0.893   | 0.893              | FALSE                   | FALSE          | Converged  |
| Lewis       | Null     | C PEPTIDE        | 0.07 (-0.10 - 0.24)   | 0.425   | 0.425              | FALSE                   | FALSE          | Converged  |
| Lewis       | Null     | CCL19 MIP3B      | 0.01 (-0.05 - 0.06)   | 0.807   | 0.807              | FALSE                   | FALSE          | Converged  |
| Lewis       | Null     | CCL20 MIP3A      | 0.04 (-0.10 - 0.17)   | 0.574   | 0.574              | FALSE                   | FALSE          | Converged  |
| Lewis       | Null     | CRP              | 0.04 (-0.06 - 0.14)   | 0.444   | 0.444              | FALSE                   | FALSE          | Converged  |
| Lewis       | Null     | CTACK            | -0.03 (-0.06 - -0.00) | 0.044   | 0.044              | FALSE                   | FALSE          | Converged  |
| Lewis       | Null     | CXCL11   TAC     | 0.04 (-0.02 - 0.11)   | 0.215   | 0.215              | FALSE                   | FALSE          | Converged  |
| Lewis       | Null     | CXCL6 GCP2       | -0.04 (-0.10 - 0.02)  | 0.154   | 0.154              | FALSE                   | FALSE          | Converged  |
| Lewis       | Null     | CXCL9 MIG        | 0.02 (-0.02 - 0.07)   | 0.321   | 0.321              | FALSE                   | FALSE          | Converged  |
| Lewis       | Null     | EGF              | -0.02 (-0.16 - 0.12)  | 0.804   | 0.804              | FALSE                   | FALSE          | Converged  |
| Lewis       | Null     | ENA 78           | -0.04 (-0.11 - 0.04)  | 0.339   | 0.339              | FALSE                   | FALSE          | Converged  |
| Lewis       | Null     | EOTAXIN 2        | 0.01 (-0.07 - 0.10)   | 0.752   | 0.752              | FALSE                   | FALSE          | Converged  |
| Lewis       | Null     | EOTAXIN          | -0.01 (-0.06 - 0.04)  | 0.651   | 0.651              | FALSE                   | FALSE          | Converged  |
| Lewis       | Null     | G CSF            | 0.03 (-0.09 - 0.14)   | 0.666   | 0.666              | FALSE                   | FALSE          | Converged  |
| Lewis       | Null     | GIP              | 0.00 (-0.22 - 0.22)   | 0.995   | 0.995              | FALSE                   | FALSE          | Converged  |
| Lewis       | Null     | GRO              | -0.00 (-0.04 - 0.04)  | 0.985   | 0.985              | FALSE                   | FALSE          | Converged  |
| Lewis       | Null     | IL 13            | -0.55 (-0.91 - -0.19) | 0.003   | 0.003              | FALSE                   | FALSE          | Converged  |
| Lewis       | Null     | IL 16            | -0.17 (-0.36 - 0.01)  | 0.063   | 0.063              | FALSE                   | FALSE          | Converged  |
| Lewis       | Null     | IL 17            | 0.25 (0.04 - 0.46)    | 0.020   | 0.020              | FALSE                   | FALSE          | Converged  |
| Lewis       | Null     | IL 23            | 0.30 (-0.37 - 0.96)   | 0.382   | 0.382              | FALSE                   | FALSE          | Converged  |
| Lewis       | Null     | IL 8             | -0.02 (-0.19 - 0.14)  | 0.782   | 0.782              | FALSE                   | FALSE          | Converged  |
| Lewis       | Null     | INSULIN          | 0.24 (-0.05 - 0.53)   | 0.103   | 0.103              | FALSE                   | FALSE          | Converged  |
| Lewis       | Null     | IP 10            | 0.03 (-0.02 - 0.07)   | 0.198   | 0.198              | FALSE                   | FALSE          | Converged  |
| Lewis       | Null     | LEPTIN           | -0.06 (-0.39 - 0.26)  | 0.696   | 0.696              | FALSE                   | FALSE          | Converged  |
| Lewis       | Null     | LIPOCALIN 2 NGAL | 0.02 (-0.05 - 0.08)   | 0.579   | 0.579              | FALSE                   | FALSE          | Converged  |
| Lewis       | Null     | MCP 1            | 0.02 (-0.02 - 0.07)   | 0.343   | 0.343              | FALSE                   | FALSE          | Converged  |
| Lewis       | Null     | MCP 2            | -0.02 (-0.07 - 0.03)  | 0.514   | 0.514              | FALSE                   | FALSE          | Converged  |
| Lewis       | Null     | MCP 4            | 0.02 (-0.07 - 0.10)   | 0.726   | 0.726              | FALSE                   | FALSE          | Converged  |
| Lewis       | Null     | MDC              | 0.00 (-0.04 - 0.05)   | 0.900   | 0.900              | FALSE                   | FALSE          | Converged  |
| Lewis       | Null     | MIP 1B           | 0.02 (-0.09 - 0.12)   | 0.762   | 0.762              | FALSE                   | FALSE          | Converged  |
| Lewis       | Null     | MIP 1D           | 0.01 (-0.04 - 0.06)   | 0.835   | 0.835              | FALSE                   | FALSE          | Converged  |
| Lewis       | Null     | PAI 1            | 0.01 (-0.06 - 0.08)   | 0.762   | 0.762              | FALSE                   | FALSE          | Converged  |
| Lewis       | Null     | PP               | -0.14 (-0.33 - 0.04)  | 0.125   | 0.125              | FALSE                   | FALSE          | Converged  |
| Lewis       | Null     | RESISTIN         | 0.02 (-0.03 - 0.08)   | 0.444   | 0.444              | FALSE                   | FALSE          | Converged  |
| Lewis       | Null     | SAA              | -0.02 (-0.13 - 0.09)  | 0.686   | 0.686              | FALSE                   | FALSE          | Converged  |
| Lewis       | Null     | SAP              | -0.03 (-0.07 - 0.01)  | 0.119   | 0.119              | FALSE                   | FALSE          | Converged  |
| Lewis       | Null     | SDF 1A B         | 0.01 (-0.06 - 0.08)   | 0.878   | 0.878              | FALSE                   | FALSE          | Converged  |
| Lewis       | Null     | SEGFR            | -0.00 (-0.03 - 0.02)  | 0.754   | 0.754              | FALSE                   | FALSE          | Converged  |
| Lewis       | Null     | SGP130           | -0.00 (-0.03 - 0.02)  | 0.678   | 0.678              | FALSE                   | FALSE          | Converged  |
| Lewis       | Null     | SIL4R            | 0.02 (-0.08 - 0.12)   | 0.706   | 0.706              | FALSE                   | FALSE          | Converged  |
| Lewis       | Null     | SIL6R            | 0.02 (-0.01 - 0.04)   | 0.212   | 0.212              | FALSE                   | FALSE          | Converged  |
| Lewis       | Null     | SILRII           | -0.01 (-0.05 - 0.02)  | 0.399   | 0.399              | FALSE                   | FALSE          | Converged  |
| Lewis       | Null     | STNFRI           | 0.03 (-0.00 - 0.07)   | 0.058   | 0.058              | FALSE                   | FALSE          | Converged  |
| Lewis       | Null     | STNFRII          | 0.01 (-0.03 - 0.05)   | 0.593   | 0.593              | FALSE                   | FALSE          | Converged  |
| Lewis       | Null     | SVEGFR2          | 0.01 (-0.02 - 0.04)   | 0.373   | 0.373              | FALSE                   | FALSE          | Converged  |
| Lewis       | Null     | SVEGFR3          | -0.04 (-0.11 - 0.04)  | 0.313   | 0.313              | FALSE                   | FALSE          | Converged  |
| Lewis       | Null     | TARC             | -0.02 (-0.10 - 0.07)  | 0.679   | 0.679              | FALSE                   | FALSE          | Converged  |
| Lewis       | Null     | TGF A            | 0.14 (0.01 - 0.27)    | 0.035   | 0.035              | FALSE                   | FALSE          | Converged  |
| Lewis       | Null     | TGF B1           | -0.01 (-0.03 - 0.01)  | 0.316   | 0.316              | FALSE                   | FALSE          | Converged  |
| Lewis       | Null     | TNFA             | 0.03 (-0.02 - 0.09)   | 0.219   | 0.219              | FALSE                   | FALSE          | Converged  |
| Lewis       | Null     | TPO              | 0.09 (-0.10 - 0.27)   | 0.363   | 0.363              | FALSE                   | FALSE          | Converged  |
| Lewis       | Null     | TRAIL            | -0.02 (-0.09 - 0.06)  | 0.606   | 0.606              | FALSE                   | FALSE          | Converged  |
| Lewis       | Null     | VEGF             | 0.08 (-0.09 - 0.26)   | 0.341   | 0.341              | FALSE                   | FALSE          | Converged  |
| Lewis       | Null     | X6CKINE          | 0.04 (-0.05 - 0.13)   | 0.365   | 0.365              | FALSE                   | FALSE          | Converged  |
| Secretor    | Secretor | ADIPONECTIN      | 0.00 (-0.02 - 0.03)   | 0.791   | 0.791              | FALSE                   | FALSE          | Converged  |
| Secretor    | Secretor | ADIPSIN          | -0.00 (-0.02 - 0.01)  | 0.771   | 0.771              | FALSE                   | FALSE          | Converged  |
| Secretor    | Secretor | AMYLIN           | -0.00 (-0.03 - 0.03)  | 0.969   | 0.969              | FALSE                   | FALSE          | Converged  |
| Secretor    | Secretor | BCA 1            | -0.00 (-0.01 - 0.01)  | 0.735   | 0.735              | FALSE                   | FALSE          | Converged  |
| Secretor    | Secretor | C PEPTIDE        | -0.01 (-0.03 - 0.02)  | 0.626   | 0.626              | FALSE                   | FALSE          | Converged  |
| Secretor    | Secretor | CCL19 MIP3B      | 0.00 (-0.01 - 0.01)   | 0.862   | 0.862              | FALSE                   | FALSE          | Converged  |
| Secretor    | Secretor | CCL20 MIP3A      | -0.00 (-0.02 - 0.02)  | 0.839   | 0.839              | FALSE                   | FALSE          | Converged  |
| Secretor    | Secretor | CRP              | -0.03 (-0.06 - -0.01) | 0.008   | 0.008              | FALSE                   | FALSE          | Converged  |
| Secretor    | Secretor | CTACK            | -0.01 (-0.01 - -0.00) | 0.046   | 0.046              | FALSE                   | FALSE          | Converged  |
| Secretor    | Secretor | CXCL11   TAC     | 0.00 (-0.01 - 0.02)   | 0.606   | 0.606              | FALSE                   | FALSE          | Converged  |
| Secretor    | Secretor | CXCL6 GCP2       | 0.01 (0.00 - 0.02)    | 0.006   | 0.006              | FALSE                   | FALSE          | Converged  |

|          |          |                  |                     |       |       |       |       |           |
|----------|----------|------------------|---------------------|-------|-------|-------|-------|-----------|
| Secretor | Secretor | CXCL9 MIG        | -0.01 (-0.02 -0.01) | 0.306 | 0.306 | FALSE | FALSE | Converged |
| Secretor | Secretor | EGF              | -0.00 (-0.03 -0.02) | 0.713 | 0.713 | FALSE | FALSE | Converged |
| Secretor | Secretor | ENA 78           | 0.01 (0.00 -0.03)   | 0.032 | 0.032 | FALSE | FALSE | Converged |
| Secretor | Secretor | EOTAXIN 2        | -0.01 (-0.02 -0.01) | 0.457 | 0.457 | FALSE | FALSE | Converged |
| Secretor | Secretor | EOTAXIN          | 0.00 (-0.01 -0.01)  | 0.563 | 0.563 | FALSE | FALSE | Converged |
| Secretor | Secretor | G CSF            | 0.01 (-0.01 -0.03)  | 0.196 | 0.196 | FALSE | FALSE | Converged |
| Secretor | Secretor | GIP              | 0.02 (-0.02 -0.06)  | 0.388 | 0.388 | FALSE | FALSE | Converged |
| Secretor | Secretor | GRO              | 0.00 (-0.00 -0.01)  | 0.310 | 0.310 | FALSE | FALSE | Converged |
| Secretor | Secretor | IL 13            | 0.05 (-0.20 -0.29)  | 0.721 | 0.721 | FALSE | FALSE | Converged |
| Secretor | Secretor | IL 16            | 0.00 (-0.02 -0.03)  | 0.723 | 0.723 | FALSE | FALSE | Converged |
| Secretor | Secretor | IL 17            | -0.02 (-0.07 -0.03) | 0.361 | 0.361 | FALSE | FALSE | Converged |
| Secretor | Secretor | IL 23            | 0.20 (-0.02 -0.41)  | 0.069 | 0.069 | FALSE | FALSE | Converged |
| Secretor | Secretor | IL 8             | 0.01 (-0.01 -0.03)  | 0.311 | 0.311 | FALSE | FALSE | Converged |
| Secretor | Secretor | INSULIN          | -0.01 (-0.05 -0.03) | 0.575 | 0.575 | FALSE | FALSE | Converged |
| Secretor | Secretor | IP 10            | 0.01 (-0.01 -0.02)  | 0.332 | 0.332 | FALSE | FALSE | Converged |
| Secretor | Secretor | LEPTIN           | -0.02 (-0.06 -0.01) | 0.204 | 0.204 | FALSE | FALSE | Converged |
| Secretor | Secretor | LIPOCALIN 2 NGAL | -0.01 (-0.03 -0.02) | 0.645 | 0.645 | FALSE | FALSE | Converged |
| Secretor | Secretor | MCP 1            | 0.00 (-0.00 -0.01)  | 0.325 | 0.325 | FALSE | FALSE | Converged |
| Secretor | Secretor | MCP 2            | 0.01 (-0.01 -0.02)  | 0.428 | 0.428 | FALSE | FALSE | Converged |
| Secretor | Secretor | MCP 4            | 0.02 (0.00 -0.04)   | 0.035 | 0.035 | FALSE | FALSE | Converged |
| Secretor | Secretor | MDC              | -0.01 (-0.02 -0.00) | 0.053 | 0.053 | FALSE | FALSE | Converged |
| Secretor | Secretor | MIP 1B           | 0.01 (-0.01 -0.02)  | 0.291 | 0.291 | FALSE | FALSE | Converged |
| Secretor | Secretor | MIP 1D           | 0.00 (-0.01 -0.01)  | 0.660 | 0.660 | FALSE | FALSE | Converged |
| Secretor | Secretor | PAI 1            | -0.00 (-0.02 -0.01) | 0.824 | 0.824 | FALSE | FALSE | Converged |
| Secretor | Secretor | PP               | 0.06 (0.02 -0.11)   | 0.004 | 0.004 | FALSE | FALSE | Converged |
| Secretor | Secretor | RESISTIN         | -0.01 (-0.03 -0.01) | 0.271 | 0.271 | FALSE | FALSE | Converged |
| Secretor | Secretor | SAA              | -0.02 (-0.04 -0.01) | 0.169 | 0.169 | FALSE | FALSE | Converged |
| Secretor | Secretor | SAP              | -0.01 (-0.01 -0.00) | 0.203 | 0.203 | FALSE | FALSE | Converged |
| Secretor | Secretor | SDF 1A B         | 0.00 (-0.01 -0.01)  | 0.753 | 0.753 | FALSE | FALSE | Converged |
| Secretor | Secretor | SEGFR            | -0.00 (-0.00 -0.00) | 0.985 | 0.985 | FALSE | FALSE | Converged |
| Secretor | Secretor | SGP130           | -0.00 (-0.01 -0.00) | 0.208 | 0.208 | FALSE | FALSE | Converged |
| Secretor | Secretor | SIL4R            | 0.00 (-0.01 -0.01)  | 0.964 | 0.964 | FALSE | FALSE | Converged |
| Secretor | Secretor | SIL6R            | -0.00 (-0.01 -0.01) | 0.863 | 0.863 | FALSE | FALSE | Converged |
| Secretor | Secretor | SILRII           | 0.00 (-0.01 -0.01)  | 0.976 | 0.976 | FALSE | FALSE | Converged |
| Secretor | Secretor | STNFRI           | 0.00 (-0.01 -0.01)  | 0.798 | 0.798 | FALSE | FALSE | Converged |
| Secretor | Secretor | STNFRII          | -0.00 (-0.01 -0.00) | 0.218 | 0.218 | FALSE | FALSE | Converged |
| Secretor | Secretor | SVEGFR2          | 0.00 (-0.00 -0.01)  | 0.497 | 0.497 | FALSE | FALSE | Converged |
| Secretor | Secretor | SVEGFR3          | -0.01 (-0.03 -0.00) | 0.135 | 0.135 | FALSE | FALSE | Converged |
| Secretor | Secretor | TARC             | 0.01 (-0.01 -0.02)  | 0.394 | 0.394 | FALSE | FALSE | Converged |
| Secretor | Secretor | TGF A            | -0.00 (-0.02 -0.02) | 0.990 | 0.990 | FALSE | FALSE | Converged |
| Secretor | Secretor | TGF B1           | -0.01 (-0.04 -0.02) | 0.468 | 0.468 | FALSE | FALSE | Converged |
| Secretor | Secretor | TNFA             | -0.01 (-0.02 -0.01) | 0.276 | 0.276 | FALSE | FALSE | Converged |
| Secretor | Secretor | TPO              | 0.02 (-0.02 -0.06)  | 0.325 | 0.325 | FALSE | FALSE | Converged |
| Secretor | Secretor | TRAIL            | -0.01 (-0.02 -0.01) | 0.369 | 0.369 | FALSE | FALSE | Converged |
| Secretor | Secretor | VEGF             | -0.01 (-0.04 -0.02) | 0.651 | 0.651 | FALSE | FALSE | Converged |
| Secretor | Secretor | X6CKINE          | -0.00 (-0.02 -0.02) | 0.821 | 0.821 | FALSE | FALSE | Converged |
| Kidd     | B        | ADIPONECTIN      | -0.01 (-0.04 -0.02) | 0.601 | 0.601 | FALSE | FALSE | Converged |
| Kidd     | B        | ADIPSIN          | 0.02 (-0.00 -0.04)  | 0.080 | 0.080 | FALSE | FALSE | Converged |
| Kidd     | B        | AMYLIN           | -0.02 (-0.05 -0.02) | 0.442 | 0.442 | FALSE | FALSE | Converged |
| Kidd     | B        | BCA 1            | -0.00 (-0.02 -0.01) | 0.646 | 0.646 | FALSE | FALSE | Converged |
| Kidd     | B        | C PEPTIDE        | 0.00 (-0.03 -0.04)  | 0.855 | 0.855 | FALSE | FALSE | Converged |
| Kidd     | B        | CCL19 MIP3B      | 0.01 (-0.00 -0.03)  | 0.172 | 0.172 | FALSE | FALSE | Converged |
| Kidd     | B        | CCL20 MIP3A      | 0.02 (-0.01 -0.04)  | 0.245 | 0.245 | FALSE | FALSE | Converged |
| Kidd     | B        | CRP              | 0.01 (-0.02 -0.04)  | 0.586 | 0.586 | FALSE | FALSE | Converged |
| Kidd     | B        | CTACK            | -0.00 (-0.01 -0.01) | 0.586 | 0.586 | FALSE | FALSE | Converged |
| Kidd     | B        | CXCL11   TAC     | 0.02 (-0.00 -0.03)  | 0.080 | 0.080 | FALSE | FALSE | Converged |
| Kidd     | B        | CXCL6 GCP2       | -0.01 (-0.02 -0.01) | 0.434 | 0.434 | FALSE | FALSE | Converged |
| Kidd     | B        | CXCL9 MIG        | 0.02 (0.01 -0.04)   | 0.010 | 0.010 | FALSE | FALSE | Converged |
| Kidd     | B        | EGF              | -0.03 (-0.06 -0.00) | 0.053 | 0.053 | FALSE | FALSE | Converged |
| Kidd     | B        | ENA 78           | -0.00 (-0.02 -0.02) | 0.997 | 0.997 | FALSE | FALSE | Converged |
| Kidd     | B        | EOTAXIN 2        | 0.01 (-0.01 -0.03)  | 0.237 | 0.237 | FALSE | FALSE | Converged |
| Kidd     | B        | EOTAXIN          | -0.01 (-0.02 -0.00) | 0.191 | 0.191 | FALSE | FALSE | Converged |
| Kidd     | B        | G CSF            | 0.00 (-0.02 -0.03)  | 0.831 | 0.831 | FALSE | FALSE | Converged |
| Kidd     | B        | GIP              | -0.01 (-0.07 -0.04) | 0.587 | 0.587 | FALSE | FALSE | Converged |
| Kidd     | B        | GRO              | -0.01 (-0.02 -0.00) | 0.244 | 0.244 | FALSE | FALSE | Converged |
| Kidd     | B        | IL 13            | -0.25 (-0.51 -0.01) | 0.058 | 0.058 | FALSE | FALSE | Converged |
| Kidd     | B        | IL 16            | -0.02 (-0.05 -0.02) | 0.345 | 0.345 | FALSE | FALSE | Converged |
| Kidd     | B        | IL 17            | -0.02 (-0.08 -0.03) | 0.441 | 0.441 | FALSE | FALSE | Converged |
| Kidd     | B        | IL 23            | -0.03 (-0.28 -0.21) | 0.781 | 0.781 | FALSE | FALSE | Converged |

|        |   |                  |                       |       |       |       |       |           |
|--------|---|------------------|-----------------------|-------|-------|-------|-------|-----------|
| Kidd   | B | IL 8             | -0.00 (-0.02 - 0.02)  | 0.965 | 0.965 | FALSE | FALSE | Converged |
| Kidd   | B | INSULIN          | -0.01 (-0.06 - 0.03)  | 0.559 | 0.559 | FALSE | FALSE | Converged |
| Kidd   | B | IP 10            | 0.01 (-0.00 - 0.02)   | 0.150 | 0.150 | FALSE | FALSE | Converged |
| Kidd   | B | LEPTIN           | -0.02 (-0.07 - 0.03)  | 0.435 | 0.435 | FALSE | FALSE | Converged |
| Kidd   | B | LIPOCALIN 2 NGAL | -0.01 (-0.04 - 0.03)  | 0.771 | 0.771 | FALSE | FALSE | Converged |
| Kidd   | B | MCP 1            | -0.00 (-0.01 - 0.01)  | 0.886 | 0.886 | FALSE | FALSE | Converged |
| Kidd   | B | MCP 2            | -0.02 (-0.04 - -0.01) | 0.008 | 0.008 | FALSE | FALSE | Converged |
| Kidd   | B | MCP 4            | -0.01 (-0.04 - 0.01)  | 0.203 | 0.203 | FALSE | FALSE | Converged |
| Kidd   | B | MDC              | -0.00 (-0.01 - 0.01)  | 0.864 | 0.864 | FALSE | FALSE | Converged |
| Kidd   | B | MIP 1B           | 0.00 (-0.02 - 0.02)   | 0.842 | 0.842 | FALSE | FALSE | Converged |
| Kidd   | B | MIP 1D           | -0.01 (-0.02 - 0.01)  | 0.384 | 0.384 | FALSE | FALSE | Converged |
| Kidd   | B | PAI 1            | 0.02 (0.00 - 0.04)    | 0.020 | 0.020 | FALSE | FALSE | Converged |
| Kidd   | B | PP               | 0.02 (-0.03 - 0.08)   | 0.408 | 0.408 | FALSE | FALSE | Converged |
| Kidd   | B | RESISTIN         | -0.00 (-0.02 - 0.02)  | 0.965 | 0.965 | FALSE | FALSE | Converged |
| Kidd   | B | SAA              | -0.00 (-0.03 - 0.03)  | 0.913 | 0.913 | FALSE | FALSE | Converged |
| Kidd   | B | SAP              | 0.00 (-0.01 - 0.01)   | 0.837 | 0.837 | FALSE | FALSE | Converged |
| Kidd   | B | SDF 1A B         | -0.01 (-0.02 - -0.00) | 0.029 | 0.029 | FALSE | FALSE | Converged |
| Kidd   | B | SEGFR            | 0.00 (-0.00 - 0.01)   | 0.404 | 0.404 | FALSE | FALSE | Converged |
| Kidd   | B | SGP130           | 0.00 (-0.00 - 0.01)   | 0.291 | 0.291 | FALSE | FALSE | Converged |
| Kidd   | B | SIL4R            | 0.00 (-0.01 - 0.02)   | 0.448 | 0.448 | FALSE | FALSE | Converged |
| Kidd   | B | SIL6R            | 0.00 (-0.00 - 0.01)   | 0.377 | 0.377 | FALSE | FALSE | Converged |
| Kidd   | B | SILRII           | 0.01 (-0.00 - 0.02)   | 0.261 | 0.261 | FALSE | FALSE | Converged |
| Kidd   | B | STNFRI           | -0.01 (-0.02 - 0.00)  | 0.213 | 0.213 | FALSE | FALSE | Converged |
| Kidd   | B | STNFRII          | 0.00 (-0.01 - 0.01)   | 0.980 | 0.980 | FALSE | FALSE | Converged |
| Kidd   | B | SVEGFR2          | 0.01 (0.00 - 0.02)    | 0.046 | 0.046 | FALSE | FALSE | Converged |
| Kidd   | B | SVEGFR3          | -0.00 (-0.02 - 0.02)  | 0.804 | 0.804 | FALSE | FALSE | Converged |
| Kidd   | B | TARC             | 0.00 (-0.02 - 0.02)   | 0.815 | 0.815 | FALSE | FALSE | Converged |
| Kidd   | B | TGF A            | -0.00 (-0.03 - 0.03)  | 0.992 | 0.992 | FALSE | FALSE | Converged |
| Kidd   | B | TGF B1           | 0.02 (-0.01 - 0.05)   | 0.248 | 0.248 | FALSE | FALSE | Converged |
| Kidd   | B | TNFA             | 0.00 (-0.01 - 0.02)   | 0.654 | 0.654 | FALSE | FALSE | Converged |
| Kidd   | B | TPO              | -0.01 (-0.06 - 0.03)  | 0.532 | 0.532 | FALSE | FALSE | Converged |
| Kidd   | B | TRAIL            | 0.01 (-0.01 - 0.02)   | 0.361 | 0.361 | FALSE | FALSE | Converged |
| Kidd   | B | VEGF             | -0.00 (-0.04 - 0.04)  | 0.922 | 0.922 | FALSE | FALSE | Converged |
| Kidd   | B | X6CKINE          | -0.01 (-0.04 - 0.01)  | 0.280 | 0.280 | FALSE | FALSE | Converged |
| Colton | B | ADIPONECTIN      | -0.02 (-0.05 - 0.02)  | 0.427 | 0.427 | FALSE | FALSE | Converged |
| Colton | B | ADIPSIN          | 0.01 (-0.01 - 0.04)   | 0.278 | 0.278 | FALSE | FALSE | Converged |
| Colton | B | AMYLIN           | -0.03 (-0.09 - 0.03)  | 0.291 | 0.291 | FALSE | FALSE | Converged |
| Colton | B | BCA 1            | -0.01 (-0.04 - 0.01)  | 0.295 | 0.295 | FALSE | FALSE | Converged |
| Colton | B | C PEPTIDE        | 0.02 (-0.03 - 0.06)   | 0.529 | 0.529 | FALSE | FALSE | Converged |
| Colton | B | CCL19 MIP3B      | 0.02 (-0.01 - 0.04)   | 0.197 | 0.197 | FALSE | FALSE | Converged |
| Colton | B | CCL20 MIP3A      | -0.00 (-0.05 - 0.04)  | 0.839 | 0.839 | FALSE | FALSE | Converged |
| Colton | B | CRP              | -0.03 (-0.08 - 0.02)  | 0.204 | 0.204 | FALSE | FALSE | Converged |
| Colton | B | CTACK            | -0.01 (-0.03 - 0.01)  | 0.307 | 0.307 | FALSE | FALSE | Converged |
| Colton | B | CXCL11 I TAC     | 0.00 (-0.03 - 0.03)   | 0.913 | 0.913 | FALSE | FALSE | Converged |
| Colton | B | CXCL6 GCP2       | 0.01 (-0.01 - 0.03)   | 0.256 | 0.256 | FALSE | FALSE | Converged |
| Colton | B | CXCL9 MIG        | -0.00 (-0.03 - 0.02)  | 0.944 | 0.944 | FALSE | FALSE | Converged |
| Colton | B | EGF              | 0.02 (-0.03 - 0.07)   | 0.372 | 0.372 | FALSE | FALSE | Converged |
| Colton | B | ENA 78           | 0.00 (-0.03 - 0.03)   | 0.988 | 0.988 | FALSE | FALSE | Converged |
| Colton | B | EOTAXIN 2        | -0.01 (-0.04 - 0.03)  | 0.755 | 0.755 | FALSE | FALSE | Converged |
| Colton | B | EOTAXIN          | 0.02 (0.00 - 0.04)    | 0.034 | 0.034 | FALSE | FALSE | Converged |
| Colton | B | G CSF            | 0.01 (-0.03 - 0.04)   | 0.703 | 0.703 | FALSE | FALSE | Converged |
| Colton | B | GIP              | -0.01 (-0.09 - 0.08)  | 0.858 | 0.858 | FALSE | FALSE | Converged |
| Colton | B | GRO              | -0.01 (-0.02 - 0.01)  | 0.326 | 0.326 | FALSE | FALSE | Converged |
| Colton | B | IL 13            | -0.01 (-0.34 - 0.33)  | 0.967 | 0.967 | FALSE | FALSE | Converged |
| Colton | B | IL 16            | 0.02 (-0.03 - 0.07)   | 0.441 | 0.441 | FALSE | FALSE | Converged |
| Colton | B | IL 17            | 0.03 (-0.05 - 0.12)   | 0.445 | 0.445 | FALSE | FALSE | Converged |
| Colton | B | IL 23            | -0.35 (-0.67 - -0.04) | 0.029 | 0.029 | FALSE | FALSE | Converged |
| Colton | B | IL 8             | -0.00 (-0.04 - 0.03)  | 0.969 | 0.969 | FALSE | FALSE | Converged |
| Colton | B | INSULIN          | 0.00 (-0.06 - 0.06)   | 0.967 | 0.967 | FALSE | FALSE | Converged |
| Colton | B | IP 10            | -0.00 (-0.02 - 0.02)  | 0.692 | 0.692 | FALSE | FALSE | Converged |
| Colton | B | LEPTIN           | -0.01 (-0.09 - 0.06)  | 0.707 | 0.707 | FALSE | FALSE | Converged |
| Colton | B | LIPOCALIN 2 NGAL | -0.03 (-0.10 - 0.04)  | 0.432 | 0.432 | FALSE | FALSE | Converged |
| Colton | B | MCP 1            | 0.01 (-0.00 - 0.03)   | 0.114 | 0.114 | FALSE | FALSE | Converged |
| Colton | B | MCP 2            | 0.00 (-0.02 - 0.03)   | 0.871 | 0.871 | FALSE | FALSE | Converged |
| Colton | B | MCP 4            | 0.02 (-0.02 - 0.05)   | 0.290 | 0.290 | FALSE | FALSE | Converged |
| Colton | B | MDC              | -0.00 (-0.02 - 0.02)  | 0.994 | 0.994 | FALSE | FALSE | Converged |
| Colton | B | MIP 1B           | 0.04 (0.02 - 0.07)    | 0.002 | 0.002 | FALSE | FALSE | Converged |
| Colton | B | MIP 1D           | -0.01 (-0.04 - 0.02)  | 0.600 | 0.600 | FALSE | FALSE | Converged |
| Colton | B | PAI 1            | 0.01 (-0.02 - 0.03)   | 0.527 | 0.527 | FALSE | FALSE | Converged |

|        |   |                  |                       |       |       |       |       |           |
|--------|---|------------------|-----------------------|-------|-------|-------|-------|-----------|
| Colton | B | PP               | -0.11 (-0.19 - -0.03) | 0.010 | 0.010 | FALSE | FALSE | Converged |
| Colton | B | RESISTIN         | -0.01 (-0.05 - 0.02)  | 0.392 | 0.392 | FALSE | FALSE | Converged |
| Colton | B | SAA              | -0.02 (-0.06 - 0.03)  | 0.406 | 0.406 | FALSE | FALSE | Converged |
| Colton | B | SAP              | -0.02 (-0.04 - 0.00)  | 0.107 | 0.107 | FALSE | FALSE | Converged |
| Colton | B | SDF 1A B         | 0.01 (-0.01 - 0.02)   | 0.447 | 0.447 | FALSE | FALSE | Converged |
| Colton | B | SEGFR            | 0.01 (-0.00 - 0.02)   | 0.058 | 0.058 | FALSE | FALSE | Converged |
| Colton | B | SGP130           | -0.00 (-0.01 - 0.01)  | 0.602 | 0.602 | FALSE | FALSE | Converged |
| Colton | B | SIL4R            | -0.02 (-0.03 - 0.00)  | 0.060 | 0.060 | FALSE | FALSE | Converged |
| Colton | B | SIL6R            | 0.01 (-0.01 - 0.02)   | 0.319 | 0.319 | FALSE | FALSE | Converged |
| Colton | B | SILRII           | 0.00 (-0.01 - 0.02)   | 0.791 | 0.791 | FALSE | FALSE | Converged |
| Colton | B | STNFRI           | 0.01 (-0.01 - 0.03)   | 0.189 | 0.189 | FALSE | FALSE | Converged |
| Colton | B | STNFRII          | 0.01 (-0.00 - 0.02)   | 0.167 | 0.167 | FALSE | FALSE | Converged |
| Colton | B | SVEGFR2          | 0.00 (-0.01 - 0.01)   | 0.521 | 0.521 | FALSE | FALSE | Converged |
| Colton | B | SVEGFR3          | 0.00 (-0.03 - 0.04)   | 0.755 | 0.755 | FALSE | FALSE | Converged |
| Colton | B | TARC             | 0.01 (-0.01 - 0.04)   | 0.328 | 0.328 | FALSE | FALSE | Converged |
| Colton | B | TGF A            | 0.02 (-0.03 - 0.06)   | 0.456 | 0.456 | FALSE | FALSE | Converged |
| Colton | B | TGF B1           | -0.00 (-0.05 - 0.05)  | 0.941 | 0.941 | FALSE | FALSE | Converged |
| Colton | B | TNFA             | 0.03 (0.01 - 0.04)    | 0.007 | 0.007 | FALSE | FALSE | Converged |
| Colton | B | TPO              | -0.03 (-0.11 - 0.04)  | 0.425 | 0.425 | FALSE | FALSE | Converged |
| Colton | B | TRAIL            | 0.01 (-0.01 - 0.03)   | 0.434 | 0.434 | FALSE | FALSE | Converged |
| Colton | B | VEGF             | 0.02 (-0.04 - 0.08)   | 0.496 | 0.496 | FALSE | FALSE | Converged |
| Colton | B | X6CKINE          | 0.03 (-0.00 - 0.07)   | 0.070 | 0.070 | FALSE | FALSE | Converged |
| Knops  | B | ADIPONECTIN      | -0.02 (-0.06 - 0.03)  | 0.446 | 0.446 | FALSE | FALSE | Converged |
| Knops  | B | ADIPSIN          | 0.00 (-0.02 - 0.03)   | 0.644 | 0.644 | FALSE | FALSE | Converged |
| Knops  | B | AMYLIN           | -0.03 (-0.08 - 0.02)  | 0.185 | 0.185 | FALSE | FALSE | Converged |
| Knops  | B | BCA 1            | 0.00 (-0.02 - 0.03)   | 0.735 | 0.735 | FALSE | FALSE | Converged |
| Knops  | B | C PEPTIDE        | -0.05 (-0.10 - -0.00) | 0.035 | 0.035 | FALSE | FALSE | Converged |
| Knops  | B | CCL19 MIP3B      | 0.01 (-0.01 - 0.04)   | 0.266 | 0.266 | FALSE | FALSE | Converged |
| Knops  | B | CCL20 MIP3A      | 0.04 (-0.01 - 0.09)   | 0.086 | 0.086 | FALSE | FALSE | Converged |
| Knops  | B | CRP              | 0.03 (-0.02 - 0.08)   | 0.272 | 0.272 | FALSE | FALSE | Converged |
| Knops  | B | CTACK            | -0.00 (-0.03 - 0.02)  | 0.711 | 0.711 | FALSE | FALSE | Converged |
| Knops  | B | CXCL11   TAC     | -0.01 (-0.04 - 0.02)  | 0.516 | 0.516 | FALSE | FALSE | Converged |
| Knops  | B | CXCL6 GCP2       | 0.03 (0.01 - 0.06)    | 0.003 | 0.003 | FALSE | FALSE | Converged |
| Knops  | B | CXCL9 MIG        | 0.01 (-0.02 - 0.04)   | 0.575 | 0.575 | FALSE | FALSE | Converged |
| Knops  | B | EGF              | 0.03 (-0.01 - 0.08)   | 0.177 | 0.177 | FALSE | FALSE | Converged |
| Knops  | B | ENA 78           | 0.01 (-0.01 - 0.04)   | 0.316 | 0.316 | FALSE | FALSE | Converged |
| Knops  | B | EOTAXIN 2        | -0.01 (-0.05 - 0.03)  | 0.589 | 0.589 | FALSE | FALSE | Converged |
| Knops  | B | EOTAXIN          | 0.01 (-0.01 - 0.04)   | 0.244 | 0.244 | FALSE | FALSE | Converged |
| Knops  | B | G CSF            | 0.02 (-0.02 - 0.06)   | 0.243 | 0.243 | FALSE | FALSE | Converged |
| Knops  | B | GIP              | -0.03 (-0.10 - 0.04)  | 0.438 | 0.438 | FALSE | FALSE | Converged |
| Knops  | B | GRO              | 0.02 (0.00 - 0.04)    | 0.017 | 0.017 | FALSE | FALSE | Converged |
| Knops  | B | IL 13            | -0.09 (-0.53 - 0.34)  | 0.673 | 0.673 | FALSE | FALSE | Converged |
| Knops  | B | IL 16            | 0.05 (-0.00 - 0.10)   | 0.074 | 0.074 | FALSE | FALSE | Converged |
| Knops  | B | IL 17            | 0.02 (-0.07 - 0.10)   | 0.697 | 0.697 | FALSE | FALSE | Converged |
| Knops  | B | IL 23            | -0.16 (-0.54 - 0.22)  | 0.401 | 0.401 | FALSE | FALSE | Converged |
| Knops  | B | IL 8             | 0.01 (-0.03 - 0.05)   | 0.536 | 0.536 | FALSE | FALSE | Converged |
| Knops  | B | INSULIN          | -0.02 (-0.08 - 0.03)  | 0.422 | 0.422 | FALSE | FALSE | Converged |
| Knops  | B | IP 10            | 0.01 (-0.02 - 0.03)   | 0.554 | 0.554 | FALSE | FALSE | Converged |
| Knops  | B | LEPTIN           | 0.08 (0.03 - 0.14)    | 0.004 | 0.004 | FALSE | FALSE | Converged |
| Knops  | B | LIPOCALIN 2 NGAL | 0.06 (0.03 - 0.09)    | 0.000 | 0.000 | FALSE | FALSE | Converged |
| Knops  | B | MCP 1            | -0.00 (-0.02 - 0.01)  | 0.620 | 0.620 | FALSE | FALSE | Converged |
| Knops  | B | MCP 2            | 0.02 (-0.01 - 0.05)   | 0.146 | 0.146 | FALSE | FALSE | Converged |
| Knops  | B | MCP 4            | 0.05 (0.02 - 0.09)    | 0.005 | 0.005 | FALSE | FALSE | Converged |
| Knops  | B | MDC              | 0.02 (-0.00 - 0.03)   | 0.070 | 0.070 | FALSE | FALSE | Converged |
| Knops  | B | MIP 1B           | 0.00 (-0.03 - 0.04)   | 0.901 | 0.901 | FALSE | FALSE | Converged |
| Knops  | B | MIP 1D           | 0.00 (-0.03 - 0.03)   | 0.840 | 0.840 | FALSE | FALSE | Converged |
| Knops  | B | PAI 1            | 0.02 (0.00 - 0.05)    | 0.037 | 0.037 | FALSE | FALSE | Converged |
| Knops  | B | PP               | -0.02 (-0.09 - 0.05)  | 0.631 | 0.631 | FALSE | FALSE | Converged |
| Knops  | B | RESISTIN         | 0.04 (0.01 - 0.06)    | 0.009 | 0.009 | FALSE | FALSE | Converged |
| Knops  | B | SAA              | 0.02 (-0.04 - 0.08)   | 0.446 | 0.446 | FALSE | FALSE | Converged |
| Knops  | B | SAP              | -0.01 (-0.04 - 0.01)  | 0.345 | 0.345 | FALSE | FALSE | Converged |
| Knops  | B | SDF 1A B         | 0.01 (-0.01 - 0.03)   | 0.324 | 0.324 | FALSE | FALSE | Converged |
| Knops  | B | SEGFR            | -0.01 (-0.02 - -0.00) | 0.048 | 0.048 | FALSE | FALSE | Converged |
| Knops  | B | SGP130           | -0.00 (-0.01 - 0.01)  | 0.689 | 0.689 | FALSE | FALSE | Converged |
| Knops  | B | SIL4R            | -0.01 (-0.02 - 0.01)  | 0.526 | 0.526 | FALSE | FALSE | Converged |
| Knops  | B | SIL6R            | -0.00 (-0.01 - 0.01)  | 0.775 | 0.775 | FALSE | FALSE | Converged |
| Knops  | B | SILRII           | -0.01 (-0.03 - 0.00)  | 0.162 | 0.162 | FALSE | FALSE | Converged |
| Knops  | B | STNFRI           | 0.00 (-0.01 - 0.02)   | 0.659 | 0.659 | FALSE | FALSE | Converged |
| Knops  | B | STNFRII          | 0.00 (-0.01 - 0.02)   | 0.751 | 0.751 | FALSE | FALSE | Converged |

|          |   |                  |                       |       |       |       |       |           |
|----------|---|------------------|-----------------------|-------|-------|-------|-------|-----------|
| Knops    | B | SVEGFR2          | -0.00 (-0.02 - 0.01)  | 0.640 | 0.640 | FALSE | FALSE | Converged |
| Knops    | B | SVEGFR3          | 0.01 (-0.02 - 0.04)   | 0.574 | 0.574 | FALSE | FALSE | Converged |
| Knops    | B | TARC             | 0.00 (-0.03 - 0.04)   | 0.940 | 0.940 | FALSE | FALSE | Converged |
| Knops    | B | TGF A            | 0.07 (0.02 - 0.12)    | 0.012 | 0.012 | FALSE | FALSE | Converged |
| Knops    | B | TGF B1           | -0.05 (-0.10 - 0.00)  | 0.056 | 0.056 | FALSE | FALSE | Converged |
| Knops    | B | TNFA             | 0.02 (-0.00 - 0.05)   | 0.083 | 0.083 | FALSE | FALSE | Converged |
| Knops    | B | TPO              | 0.08 (0.00 - 0.16)    | 0.046 | 0.046 | FALSE | FALSE | Converged |
| Knops    | B | TRAIL            | 0.01 (-0.02 - 0.04)   | 0.392 | 0.392 | FALSE | FALSE | Converged |
| Knops    | B | VEGF             | 0.04 (-0.03 - 0.10)   | 0.253 | 0.253 | FALSE | FALSE | Converged |
| Knops    | B | X6CKINE          | 0.02 (-0.02 - 0.06)   | 0.255 | 0.255 | FALSE | FALSE | Converged |
| Kell     | K | ADIPONECTIN      | 0.03 (-0.01 - 0.06)   | 0.152 | 0.152 | FALSE | FALSE | Converged |
| Kell     | K | ADIPSIN          | 0.01 (-0.01 - 0.03)   | 0.571 | 0.571 | FALSE | FALSE | Converged |
| Kell     | K | AMYLIN           | 0.01 (-0.06 - 0.07)   | 0.799 | 0.799 | FALSE | FALSE | Converged |
| Kell     | K | BCA 1            | -0.01 (-0.03 - 0.01)  | 0.335 | 0.335 | FALSE | FALSE | Converged |
| Kell     | K | C PEPTIDE        | 0.00 (-0.04 - 0.05)   | 0.925 | 0.925 | FALSE | FALSE | Converged |
| Kell     | K | CCL19 MIP3B      | -0.01 (-0.03 - 0.01)  | 0.362 | 0.362 | FALSE | FALSE | Converged |
| Kell     | K | CCL20 MIP3A      | 0.00 (-0.04 - 0.04)   | 0.871 | 0.871 | FALSE | FALSE | Converged |
| Kell     | K | CRP              | -0.01 (-0.05 - 0.03)  | 0.681 | 0.681 | FALSE | FALSE | Converged |
| Kell     | K | CTACK            | 0.01 (-0.00 - 0.02)   | 0.217 | 0.217 | FALSE | FALSE | Converged |
| Kell     | K | CXCL11 I TAC     | -0.00 (-0.03 - 0.02)  | 0.941 | 0.941 | FALSE | FALSE | Converged |
| Kell     | K | CXCL6 GCP2       | -0.00 (-0.02 - 0.01)  | 0.689 | 0.689 | FALSE | FALSE | Converged |
| Kell     | K | CXCL9 MIG        | -0.00 (-0.02 - 0.02)  | 0.876 | 0.876 | FALSE | FALSE | Converged |
| Kell     | K | EGF              | -0.00 (-0.04 - 0.03)  | 0.815 | 0.815 | FALSE | FALSE | Converged |
| Kell     | K | ENA 78           | -0.01 (-0.03 - 0.01)  | 0.376 | 0.376 | FALSE | FALSE | Converged |
| Kell     | K | EOTAXIN 2        | -0.02 (-0.04 - 0.01)  | 0.319 | 0.319 | FALSE | FALSE | Converged |
| Kell     | K | EOTAXIN          | -0.01 (-0.02 - 0.01)  | 0.349 | 0.349 | FALSE | FALSE | Converged |
| Kell     | K | G CSF            | -0.01 (-0.04 - 0.02)  | 0.517 | 0.517 | FALSE | FALSE | Converged |
| Kell     | K | GIP              | 0.01 (-0.07 - 0.09)   | 0.828 | 0.828 | FALSE | FALSE | Converged |
| Kell     | K | GRO              | -0.00 (-0.02 - 0.01)  | 0.901 | 0.901 | FALSE | FALSE | Converged |
| Kell     | K | IL 13            | -0.12 (-0.41 - 0.16)  | 0.385 | 0.385 | FALSE | FALSE | Converged |
| Kell     | K | IL 16            | -0.05 (-0.09 - -0.01) | 0.023 | 0.023 | FALSE | FALSE | Converged |
| Kell     | K | IL 17            | -0.04 (-0.12 - 0.04)  | 0.310 | 0.310 | FALSE | FALSE | Converged |
| Kell     | K | IL 23            | 0.14 (-0.11 - 0.40)   | 0.275 | 0.275 | FALSE | FALSE | Converged |
| Kell     | K | IL 8             | 0.01 (-0.03 - 0.05)   | 0.636 | 0.636 | FALSE | FALSE | Converged |
| Kell     | K | INSULIN          | -0.03 (-0.11 - 0.06)  | 0.541 | 0.541 | FALSE | FALSE | Converged |
| Kell     | K | IP 10            | -0.01 (-0.03 - 0.01)  | 0.443 | 0.443 | FALSE | FALSE | Converged |
| Kell     | K | LEPTIN           | -0.07 (-0.14 - 0.00)  | 0.061 | 0.061 | FALSE | FALSE | Converged |
| Kell     | K | LIPOCALIN 2 NGAL | 0.01 (-0.04 - 0.05)   | 0.820 | 0.820 | FALSE | FALSE | Converged |
| Kell     | K | MCP 1            | -0.00 (-0.02 - 0.01)  | 0.475 | 0.475 | FALSE | FALSE | Converged |
| Kell     | K | MCP 2            | -0.03 (-0.06 - -0.01) | 0.017 | 0.017 | FALSE | FALSE | Converged |
| Kell     | K | MCP 4            | -0.05 (-0.08 - -0.02) | 0.003 | 0.003 | FALSE | FALSE | Converged |
| Kell     | K | MDC              | 0.00 (-0.01 - 0.02)   | 0.540 | 0.540 | FALSE | FALSE | Converged |
| Kell     | K | MIP 1B           | -0.01 (-0.04 - 0.01)  | 0.279 | 0.279 | FALSE | FALSE | Converged |
| Kell     | K | MIP 1D           | -0.01 (-0.03 - 0.02)  | 0.530 | 0.530 | FALSE | FALSE | Converged |
| Kell     | K | PAI 1            | 0.01 (-0.02 - 0.03)   | 0.517 | 0.517 | FALSE | FALSE | Converged |
| Kell     | K | PP               | 0.01 (-0.08 - 0.10)   | 0.821 | 0.821 | FALSE | FALSE | Converged |
| Kell     | K | RESISTIN         | -0.01 (-0.04 - 0.03)  | 0.652 | 0.652 | FALSE | FALSE | Converged |
| Kell     | K | SAA              | 0.01 (-0.03 - 0.05)   | 0.607 | 0.607 | FALSE | FALSE | Converged |
| Kell     | K | SAP              | 0.00 (-0.01 - 0.02)   | 0.792 | 0.792 | FALSE | FALSE | Converged |
| Kell     | K | SDF 1A B         | -0.00 (-0.02 - 0.01)  | 0.694 | 0.694 | FALSE | FALSE | Converged |
| Kell     | K | SEGFR            | -0.00 (-0.01 - 0.00)  | 0.403 | 0.403 | FALSE | FALSE | Converged |
| Kell     | K | SGP130           | -0.01 (-0.02 - -0.00) | 0.018 | 0.018 | FALSE | FALSE | Converged |
| Kell     | K | SIL4R            | 0.00 (-0.01 - 0.02)   | 0.691 | 0.691 | FALSE | FALSE | Converged |
| Kell     | K | SIL6R            | -0.01 (-0.02 - -0.00) | 0.044 | 0.044 | FALSE | FALSE | Converged |
| Kell     | K | SILRII           | -0.00 (-0.02 - 0.01)  | 0.678 | 0.678 | FALSE | FALSE | Converged |
| Kell     | K | STNFRI           | -0.01 (-0.03 - -0.00) | 0.018 | 0.018 | FALSE | FALSE | Converged |
| Kell     | K | STNFRII          | -0.01 (-0.02 - -0.00) | 0.026 | 0.026 | FALSE | FALSE | Converged |
| Kell     | K | SVEGFR2          | -0.01 (-0.02 - 0.00)  | 0.317 | 0.317 | FALSE | FALSE | Converged |
| Kell     | K | SVEGFR3          | -0.01 (-0.04 - 0.02)  | 0.389 | 0.389 | FALSE | FALSE | Converged |
| Kell     | K | TARC             | -0.01 (-0.04 - 0.01)  | 0.243 | 0.243 | FALSE | FALSE | Converged |
| Kell     | K | TGF A            | -0.02 (-0.07 - 0.03)  | 0.384 | 0.384 | FALSE | FALSE | Converged |
| Kell     | K | TGF B1           | 0.04 (-0.01 - 0.08)   | 0.095 | 0.095 | FALSE | FALSE | Converged |
| Kell     | K | TNFA             | -0.01 (-0.03 - 0.01)  | 0.239 | 0.239 | FALSE | FALSE | Converged |
| Kell     | K | TPO              | -0.01 (-0.07 - 0.05)  | 0.740 | 0.740 | FALSE | FALSE | Converged |
| Kell     | K | TRAIL            | -0.00 (-0.02 - 0.01)  | 0.688 | 0.688 | FALSE | FALSE | Converged |
| Kell     | K | VEGF             | -0.02 (-0.08 - 0.03)  | 0.414 | 0.414 | FALSE | FALSE | Converged |
| Kell     | K | X6CKINE          | -0.04 (-0.07 - -0.01) | 0.015 | 0.015 | FALSE | FALSE | Converged |
| Dombrock | B | ADIPONECTIN      | 0.02 (-0.01 - 0.05)   | 0.216 | 0.216 | FALSE | FALSE | Converged |
| Dombrock | B | ADIPSIN          | -0.00 (-0.02 - 0.01)  | 0.785 | 0.785 | FALSE | FALSE | Converged |



|          |   |                  |                     |       |       |       |       |           |
|----------|---|------------------|---------------------|-------|-------|-------|-------|-----------|
| Dombrock | B | AMYLIN           | 0.01 (-0.03 -0.05)  | 0.673 | 0.673 | FALSE | FALSE | Converged |
| Dombrock | B | BCA 1            | 0.00 (-0.01 -0.02)  | 0.594 | 0.594 | FALSE | FALSE | Converged |
| Dombrock | B | C PEPTIDE        | 0.02 (-0.02 -0.05)  | 0.385 | 0.385 | FALSE | FALSE | Converged |
| Dombrock | B | CCL19 MIP3B      | -0.03 (-0.05 -0.01) | 0.001 | 0.001 | FALSE | FALSE | Converged |
| Dombrock | B | CCL20 MIP3A      | -0.04 (-0.07 -0.01) | 0.012 | 0.012 | FALSE | FALSE | Converged |
| Dombrock | B | CRP              | -0.02 (-0.05 -0.02) | 0.282 | 0.282 | FALSE | FALSE | Converged |
| Dombrock | B | CTACK            | 0.00 (-0.00 -0.01)  | 0.368 | 0.368 | FALSE | FALSE | Converged |
| Dombrock | B | CXCL11   TAC     | 0.00 (-0.02 -0.02)  | 0.744 | 0.744 | FALSE | FALSE | Converged |
| Dombrock | B | CXCL6 GCP2       | -0.01 (-0.02 -0.01) | 0.349 | 0.349 | FALSE | FALSE | Converged |
| Dombrock | B | CXCL9 MIG        | -0.01 (-0.03 -0.00) | 0.131 | 0.131 | FALSE | FALSE | Converged |
| Dombrock | B | EGF              | 0.02 (-0.01 -0.06)  | 0.134 | 0.134 | FALSE | FALSE | Converged |
| Dombrock | B | ENA 78           | -0.01 (-0.03 -0.00) | 0.079 | 0.079 | FALSE | FALSE | Converged |
| Dombrock | B | EOTAXIN 2        | 0.00 (-0.02 -0.02)  | 0.823 | 0.823 | FALSE | FALSE | Converged |
| Dombrock | B | EOTAXIN          | 0.01 (-0.01 -0.02)  | 0.346 | 0.346 | FALSE | FALSE | Converged |
| Dombrock | B | G CSF            | 0.01 (-0.01 -0.04)  | 0.330 | 0.330 | FALSE | FALSE | Converged |
| Dombrock | B | GIP              | 0.02 (-0.04 -0.08)  | 0.556 | 0.556 | FALSE | FALSE | Converged |
| Dombrock | B | GRO              | 0.00 (-0.01 -0.01)  | 0.537 | 0.537 | FALSE | FALSE | Converged |
| Dombrock | B | IL 13            | 0.06 (-0.17 -0.30)  | 0.599 | 0.599 | FALSE | FALSE | Converged |
| Dombrock | B | IL 16            | -0.01 (-0.04 -0.02) | 0.482 | 0.482 | FALSE | FALSE | Converged |
| Dombrock | B | IL 17            | -0.06 (-0.12 -0.00) | 0.054 | 0.054 | FALSE | FALSE | Converged |
| Dombrock | B | IL 23            | 0.13 (-0.09 -0.36)  | 0.243 | 0.243 | FALSE | FALSE | Converged |
| Dombrock | B | IL 8             | 0.01 (-0.01 -0.04)  | 0.288 | 0.288 | FALSE | FALSE | Converged |
| Dombrock | B | INSULIN          | 0.00 (-0.05 -0.05)  | 0.863 | 0.863 | FALSE | FALSE | Converged |
| Dombrock | B | IP 10            | -0.01 (-0.02 -0.01) | 0.228 | 0.228 | FALSE | FALSE | Converged |
| Dombrock | B | LEPTIN           | 0.03 (-0.02 -0.09)  | 0.216 | 0.216 | FALSE | FALSE | Converged |
| Dombrock | B | LIPOCALIN 2 NGAL | -0.02 (-0.06 -0.02) | 0.346 | 0.346 | FALSE | FALSE | Converged |
| Dombrock | B | MCP 1            | 0.01 (0.00 -0.02)   | 0.039 | 0.039 | FALSE | FALSE | Converged |
| Dombrock | B | MCP 2            | 0.00 (-0.01 -0.02)  | 0.682 | 0.682 | FALSE | FALSE | Converged |
| Dombrock | B | MCP 4            | -0.00 (-0.03 -0.02) | 0.850 | 0.850 | FALSE | FALSE | Converged |
| Dombrock | B | MDC              | -0.00 (-0.01 -0.01) | 0.831 | 0.831 | FALSE | FALSE | Converged |
| Dombrock | B | MIP 1B           | 0.02 (0.00 -0.04)   | 0.014 | 0.014 | FALSE | FALSE | Converged |
| Dombrock | B | MIP 1D           | 0.01 (-0.01 -0.02)  | 0.266 | 0.266 | FALSE | FALSE | Converged |
| Dombrock | B | PAI 1            | -0.01 (-0.03 -0.00) | 0.145 | 0.145 | FALSE | FALSE | Converged |
| Dombrock | B | PP               | 0.03 (-0.03 -0.10)  | 0.269 | 0.269 | FALSE | FALSE | Converged |
| Dombrock | B | RESISTIN         | -0.00 (-0.03 -0.02) | 0.754 | 0.754 | FALSE | FALSE | Converged |
| Dombrock | B | SAA              | -0.03 (-0.06 -0.00) | 0.094 | 0.094 | FALSE | FALSE | Converged |
| Dombrock | B | SAP              | -0.00 (-0.02 -0.01) | 0.469 | 0.469 | FALSE | FALSE | Converged |
| Dombrock | B | SDF 1A B         | 0.00 (-0.01 -0.01)  | 0.906 | 0.906 | FALSE | FALSE | Converged |
| Dombrock | B | SEGFR            | 0.00 (-0.00 -0.01)  | 0.643 | 0.643 | FALSE | FALSE | Converged |
| Dombrock | B | SGP130           | -0.00 (-0.01 -0.01) | 0.772 | 0.772 | FALSE | FALSE | Converged |
| Dombrock | B | SIL4R            | -0.01 (-0.03 -0.00) | 0.028 | 0.028 | FALSE | FALSE | Converged |
| Dombrock | B | SIL6R            | 0.01 (-0.00 -0.01)  | 0.245 | 0.245 | FALSE | FALSE | Converged |
| Dombrock | B | SILRII           | -0.00 (-0.02 -0.01) | 0.441 | 0.441 | FALSE | FALSE | Converged |
| Dombrock | B | STNFRI           | -0.00 (-0.01 -0.01) | 0.925 | 0.925 | FALSE | FALSE | Converged |
| Dombrock | B | STNFRII          | -0.01 (-0.02 -0.00) | 0.089 | 0.089 | FALSE | FALSE | Converged |
| Dombrock | B | SVEGFR2          | -0.00 (-0.01 -0.00) | 0.267 | 0.267 | FALSE | FALSE | Converged |
| Dombrock | B | SVEGFR3          | 0.01 (-0.01 -0.03)  | 0.342 | 0.342 | FALSE | FALSE | Converged |
| Dombrock | B | TARC             | -0.00 (-0.02 -0.02) | 0.904 | 0.904 | FALSE | FALSE | Converged |
| Dombrock | B | TGF A            | -0.05 (-0.08 -0.02) | 0.002 | 0.002 | FALSE | FALSE | Converged |
| Dombrock | B | TGF B1           | -0.00 (-0.04 -0.03) | 0.797 | 0.797 | FALSE | FALSE | Converged |
| Dombrock | B | TNFA             | 0.00 (-0.01 -0.02)  | 0.622 | 0.622 | FALSE | FALSE | Converged |
| Dombrock | B | TPO              | -0.05 (-0.09 -0.00) | 0.057 | 0.057 | FALSE | FALSE | Converged |
| Dombrock | B | TRAIL            | 0.00 (-0.01 -0.02)  | 0.707 | 0.707 | FALSE | FALSE | Converged |
| Dombrock | B | VEGF             | -0.01 (-0.05 -0.04) | 0.720 | 0.720 | FALSE | FALSE | Converged |
| Dombrock | B | X6CKINE          | -0.02 (-0.04 -0.01) | 0.232 | 0.232 | FALSE | FALSE | Converged |
| RhE      | E | ADIPONECTIN      | -0.01 (-0.03 -0.02) | 0.639 | 0.639 | FALSE | FALSE | Converged |
| RhE      | E | ADIPSIN          | -0.01 (-0.02 -0.01) | 0.267 | 0.267 | FALSE | FALSE | Converged |
| RhE      | E | AMYLIN           | -0.01 (-0.05 -0.03) | 0.688 | 0.688 | FALSE | FALSE | Converged |
| RhE      | E | BCA 1            | -0.00 (-0.02 -0.01) | 0.685 | 0.685 | FALSE | FALSE | Converged |
| RhE      | E | C PEPTIDE        | -0.01 (-0.05 -0.03) | 0.575 | 0.575 | FALSE | FALSE | Converged |
| RhE      | E | CCL19 MIP3B      | -0.02 (-0.03 -0.00) | 0.042 | 0.042 | FALSE | FALSE | Converged |
| RhE      | E | CCL20 MIP3A      | -0.01 (-0.03 -0.02) | 0.618 | 0.618 | FALSE | FALSE | Converged |
| RhE      | E | CRP              | -0.02 (-0.05 -0.01) | 0.263 | 0.263 | FALSE | FALSE | Converged |
| RhE      | E | CTACK            | 0.01 (0.01 -0.02)   | 0.000 | 0.000 | FALSE | FALSE | Converged |
| RhE      | E | CXCL11   TAC     | -0.00 (-0.02 -0.02) | 0.911 | 0.911 | FALSE | FALSE | Converged |
| RhE      | E | CXCL6 GCP2       | 0.00 (-0.01 -0.01)  | 0.706 | 0.706 | FALSE | FALSE | Converged |
| RhE      | E | CXCL9 MIG        | -0.00 (-0.02 -0.01) | 0.569 | 0.569 | FALSE | FALSE | Converged |
| RhE      | E | EGF              | 0.00 (-0.03 -0.03)  | 0.949 | 0.949 | FALSE | FALSE | Converged |
| RhE      | E | ENA 78           | 0.01 (-0.00 -0.02)  | 0.160 | 0.160 | FALSE | FALSE | Converged |

|     |   |                  |                     |       |       |       |       |           |
|-----|---|------------------|---------------------|-------|-------|-------|-------|-----------|
| RhE | E | EOTAXIN 2        | 0.00 (-0.02 -0.02)  | 0.946 | 0.946 | FALSE | FALSE | Converged |
| RhE | E | EOTAXIN          | 0.00 (-0.01 -0.02)  | 0.652 | 0.652 | FALSE | FALSE | Converged |
| RhE | E | G CSF            | 0.00 (-0.02 -0.02)  | 0.990 | 0.990 | FALSE | FALSE | Converged |
| RhE | E | GIP              | -0.04 (-0.09 -0.02) | 0.169 | 0.169 | FALSE | FALSE | Converged |
| RhE | E | GRO              | 0.00 (-0.01 -0.01)  | 0.798 | 0.798 | FALSE | FALSE | Converged |
| RhE | E | IL 13            | 0.33 (0.10 -0.56)   | 0.005 | 0.005 | FALSE | FALSE | Converged |
| RhE | E | IL 16            | -0.02 (-0.05 -0.01) | 0.131 | 0.131 | FALSE | FALSE | Converged |
| RhE | E | IL 17            | -0.01 (-0.06 -0.04) | 0.763 | 0.763 | FALSE | FALSE | Converged |
| RhE | E | IL 23            | 0.09 (-0.10 -0.29)  | 0.346 | 0.346 | FALSE | FALSE | Converged |
| RhE | E | IL 8             | 0.00 (-0.02 -0.03)  | 0.738 | 0.738 | FALSE | FALSE | Converged |
| RhE | E | INSULIN          | 0.01 (-0.04 -0.05)  | 0.706 | 0.706 | FALSE | FALSE | Converged |
| RhE | E | IP 10            | -0.01 (-0.02 -0.00) | 0.091 | 0.091 | FALSE | FALSE | Converged |
| RhE | E | LEPTIN           | 0.00 (-0.04 -0.05)  | 0.934 | 0.934 | FALSE | FALSE | Converged |
| RhE | E | LIPOCALIN 2 NGAL | -0.05 (-0.09 -0.00) | 0.030 | 0.030 | FALSE | FALSE | Converged |
| RhE | E | MCP 1            | -0.00 (-0.01 -0.01) | 0.708 | 0.708 | FALSE | FALSE | Converged |
| RhE | E | MCP 2            | 0.01 (-0.01 -0.02)  | 0.302 | 0.302 | FALSE | FALSE | Converged |
| RhE | E | MCP 4            | 0.00 (-0.02 -0.03)  | 0.685 | 0.685 | FALSE | FALSE | Converged |
| RhE | E | MDC              | -0.00 (-0.01 -0.01) | 0.792 | 0.792 | FALSE | FALSE | Converged |
| RhE | E | MIP 1B           | 0.01 (-0.01 -0.03)  | 0.175 | 0.175 | FALSE | FALSE | Converged |
| RhE | E | MIP 1D           | 0.01 (-0.00 -0.02)  | 0.103 | 0.103 | FALSE | FALSE | Converged |
| RhE | E | PAI 1            | -0.01 (-0.03 -0.00) | 0.163 | 0.163 | FALSE | FALSE | Converged |
| RhE | E | PP               | -0.04 (-0.10 -0.01) | 0.113 | 0.113 | FALSE | FALSE | Converged |
| RhE | E | RESISTIN         | -0.01 (-0.03 -0.02) | 0.656 | 0.656 | FALSE | FALSE | Converged |
| RhE | E | SAA              | -0.01 (-0.04 -0.01) | 0.317 | 0.317 | FALSE | FALSE | Converged |
| RhE | E | SAP              | -0.01 (-0.02 -0.00) | 0.181 | 0.181 | FALSE | FALSE | Converged |
| RhE | E | SDF 1A B         | 0.01 (-0.00 -0.02)  | 0.237 | 0.237 | FALSE | FALSE | Converged |
| RhE | E | SEGFR            | 0.00 (-0.00 -0.01)  | 0.133 | 0.133 | FALSE | FALSE | Converged |
| RhE | E | SGP130           | 0.00 (-0.00 -0.01)  | 0.487 | 0.487 | FALSE | FALSE | Converged |
| RhE | E | SIL4R            | -0.00 (-0.01 -0.01) | 0.884 | 0.884 | FALSE | FALSE | Converged |
| RhE | E | SIL6R            | 0.00 (-0.00 -0.01)  | 0.247 | 0.247 | FALSE | FALSE | Converged |
| RhE | E | SILRII           | 0.01 (0.00 -0.02)   | 0.014 | 0.014 | FALSE | FALSE | Converged |
| RhE | E | STNFRI           | 0.01 (-0.00 -0.02)  | 0.134 | 0.134 | FALSE | FALSE | Converged |
| RhE | E | STNFRII          | 0.00 (-0.00 -0.01)  | 0.361 | 0.361 | FALSE | FALSE | Converged |
| RhE | E | SVEGFR2          | 0.00 (-0.01 -0.01)  | 0.579 | 0.579 | FALSE | FALSE | Converged |
| RhE | E | SVEGFR3          | 0.01 (-0.01 -0.03)  | 0.193 | 0.193 | FALSE | FALSE | Converged |
| RhE | E | TARC             | 0.01 (-0.01 -0.03)  | 0.301 | 0.301 | FALSE | FALSE | Converged |
| RhE | E | TGF A            | -0.00 (-0.03 -0.03) | 0.933 | 0.933 | FALSE | FALSE | Converged |
| RhE | E | TGF B1           | 0.01 (-0.02 -0.05)  | 0.413 | 0.413 | FALSE | FALSE | Converged |
| RhE | E | TNFA             | -0.00 (-0.02 -0.01) | 0.824 | 0.824 | FALSE | FALSE | Converged |
| RhE | E | TPO              | -0.03 (-0.07 -0.02) | 0.235 | 0.235 | FALSE | FALSE | Converged |
| RhE | E | TRAIL            | 0.00 (-0.01 -0.02)  | 0.805 | 0.805 | FALSE | FALSE | Converged |
| RhE | E | VEGF             | -0.01 (-0.05 -0.03) | 0.501 | 0.501 | FALSE | FALSE | Converged |
| RhE | E | X6CKINE          | -0.00 (-0.02 -0.02) | 0.798 | 0.798 | FALSE | FALSE | Converged |
| Aub | B | ADIPONECTIN      | -0.00 (-0.05 -0.04) | 0.853 | 0.853 | FALSE | FALSE | Converged |
| Aub | B | ADIPSIN          | -0.01 (-0.03 -0.01) | 0.462 | 0.462 | FALSE | FALSE | Converged |
| Aub | B | AMYLIN           | 0.01 (-0.05 -0.06)  | 0.863 | 0.863 | FALSE | FALSE | Converged |
| Aub | B | BCA 1            | 0.01 (-0.01 -0.03)  | 0.511 | 0.511 | FALSE | FALSE | Converged |
| Aub | B | C PEPTIDE        | -0.01 (-0.07 -0.05) | 0.658 | 0.658 | FALSE | FALSE | Converged |
| Aub | B | CCL19 MIP3B      | 0.00 (-0.02 -0.03)  | 0.775 | 0.775 | FALSE | FALSE | Converged |
| Aub | B | CCL20 MIP3A      | 0.01 (-0.04 -0.05)  | 0.811 | 0.811 | FALSE | FALSE | Converged |
| Aub | B | CRP              | 0.05 (0.00 -0.09)   | 0.036 | 0.036 | FALSE | FALSE | Converged |
| Aub | B | CTACK            | -0.00 (-0.01 -0.01) | 0.677 | 0.677 | FALSE | FALSE | Converged |
| Aub | B | CXCL11   TAC     | -0.02 (-0.05 -0.01) | 0.208 | 0.208 | FALSE | FALSE | Converged |
| Aub | B | CXCL6 GCP2       | 0.01 (-0.01 -0.03)  | 0.480 | 0.480 | FALSE | FALSE | Converged |
| Aub | B | CXCL9 MIG        | -0.01 (-0.03 -0.01) | 0.323 | 0.323 | FALSE | FALSE | Converged |
| Aub | B | EGF              | -0.01 (-0.06 -0.04) | 0.684 | 0.684 | FALSE | FALSE | Converged |
| Aub | B | ENA 78           | 0.01 (-0.02 -0.03)  | 0.566 | 0.566 | FALSE | FALSE | Converged |
| Aub | B | EOTAXIN 2        | 0.02 (-0.01 -0.04)  | 0.307 | 0.307 | FALSE | FALSE | Converged |
| Aub | B | EOTAXIN          | 0.02 (-0.00 -0.04)  | 0.098 | 0.098 | FALSE | FALSE | Converged |
| Aub | B | G CSF            | -0.02 (-0.06 -0.01) | 0.203 | 0.203 | FALSE | FALSE | Converged |
| Aub | B | GIP              | 0.02 (-0.06 -0.09)  | 0.696 | 0.696 | FALSE | FALSE | Converged |
| Aub | B | GRO              | 0.01 (-0.00 -0.02)  | 0.182 | 0.182 | FALSE | FALSE | Converged |
| Aub | B | IL 13            | -0.15 (-0.64 -0.34) | 0.541 | 0.541 | FALSE | FALSE | Converged |
| Aub | B | IL 16            | -0.01 (-0.06 -0.03) | 0.595 | 0.595 | FALSE | FALSE | Converged |
| Aub | B | IL 17            | 0.05 (-0.03 -0.13)  | 0.263 | 0.263 | FALSE | FALSE | Converged |
| Aub | B | IL 23            | 0.07 (-0.19 -0.33)  | 0.609 | 0.609 | FALSE | FALSE | Converged |
| Aub | B | IL 8             | -0.00 (-0.04 -0.03) | 0.880 | 0.880 | FALSE | FALSE | Converged |
| Aub | B | INSULIN          | -0.00 (-0.07 -0.06) | 0.976 | 0.976 | FALSE | FALSE | Converged |
| Aub | B | IP 10            | -0.01 (-0.03 -0.01) | 0.200 | 0.200 | FALSE | FALSE | Converged |

|          |   |                  |                       |       |       |       |       |           |
|----------|---|------------------|-----------------------|-------|-------|-------|-------|-----------|
| Aub      | B | LEPTIN           | -0.04 (-0.11 - 0.03)  | 0.299 | 0.299 | FALSE | FALSE | Converged |
| Aub      | B | LIPOCALIN 2 NGAL | -0.02 (-0.09 - 0.05)  | 0.593 | 0.593 | FALSE | FALSE | Converged |
| Aub      | B | MCP 1            | 0.00 (-0.01 - 0.02)   | 0.688 | 0.688 | FALSE | FALSE | Converged |
| Aub      | B | MCP 2            | 0.01 (-0.02 - 0.03)   | 0.592 | 0.592 | FALSE | FALSE | Converged |
| Aub      | B | MCP 4            | -0.01 (-0.05 - 0.03)  | 0.599 | 0.599 | FALSE | FALSE | Converged |
| Aub      | B | MDC              | 0.00 (-0.01 - 0.02)   | 0.590 | 0.590 | FALSE | FALSE | Converged |
| Aub      | B | MIP 1B           | -0.01 (-0.04 - 0.02)  | 0.653 | 0.653 | FALSE | FALSE | Converged |
| Aub      | B | MIP 1D           | -0.02 (-0.04 - 0.01)  | 0.202 | 0.202 | FALSE | FALSE | Converged |
| Aub      | B | PAI 1            | -0.01 (-0.03 - 0.02)  | 0.495 | 0.495 | FALSE | FALSE | Converged |
| Aub      | B | PP               | 0.03 (-0.05 - 0.11)   | 0.450 | 0.450 | FALSE | FALSE | Converged |
| Aub      | B | RESISTIN         | -0.01 (-0.04 - 0.03)  | 0.689 | 0.689 | FALSE | FALSE | Converged |
| Aub      | B | SAA              | 0.01 (-0.03 - 0.06)   | 0.556 | 0.556 | FALSE | FALSE | Converged |
| Aub      | B | SAP              | 0.01 (-0.01 - 0.02)   | 0.325 | 0.325 | FALSE | FALSE | Converged |
| Aub      | B | SDF 1A B         | -0.00 (-0.02 - 0.02)  | 0.843 | 0.843 | FALSE | FALSE | Converged |
| Aub      | B | SEGFR            | -0.00 (-0.01 - 0.01)  | 0.950 | 0.950 | FALSE | FALSE | Converged |
| Aub      | B | SGP130           | -0.00 (-0.01 - 0.01)  | 0.520 | 0.520 | FALSE | FALSE | Converged |
| Aub      | B | SIL4R            | -0.02 (-0.03 - -0.00) | 0.033 | 0.033 | FALSE | FALSE | Converged |
| Aub      | B | SIL6R            | -0.00 (-0.01 - 0.01)  | 0.998 | 0.998 | FALSE | FALSE | Converged |
| Aub      | B | SILRII           | -0.01 (-0.03 - 0.00)  | 0.179 | 0.179 | FALSE | FALSE | Converged |
| Aub      | B | STNFRI           | 0.00 (-0.01 - 0.02)   | 0.527 | 0.527 | FALSE | FALSE | Converged |
| Aub      | B | STNFRII          | 0.00 (-0.01 - 0.01)   | 0.884 | 0.884 | FALSE | FALSE | Converged |
| Aub      | B | SVEGFR2          | -0.01 (-0.02 - 0.01)  | 0.362 | 0.362 | FALSE | FALSE | Converged |
| Aub      | B | SVEGFR3          | -0.00 (-0.03 - 0.03)  | 0.964 | 0.964 | FALSE | FALSE | Converged |
| Aub      | B | TARC             | 0.01 (-0.02 - 0.03)   | 0.447 | 0.447 | FALSE | FALSE | Converged |
| Aub      | B | TGF A            | 0.02 (-0.03 - 0.06)   | 0.450 | 0.450 | FALSE | FALSE | Converged |
| Aub      | B | TGF B1           | -0.00 (-0.06 - 0.06)  | 0.994 | 0.994 | FALSE | FALSE | Converged |
| Aub      | B | TNFA             | 0.01 (-0.01 - 0.03)   | 0.450 | 0.450 | FALSE | FALSE | Converged |
| Aub      | B | TPO              | -0.02 (-0.09 - 0.04)  | 0.518 | 0.518 | FALSE | FALSE | Converged |
| Aub      | B | TRAIL            | -0.02 (-0.04 - 0.01)  | 0.142 | 0.142 | FALSE | FALSE | Converged |
| Aub      | B | VEGF             | 0.04 (-0.02 - 0.10)   | 0.245 | 0.245 | FALSE | FALSE | Converged |
| Aub      | B | X6CKINE          | 0.00 (-0.03 - 0.04)   | 0.842 | 0.842 | FALSE | FALSE | Converged |
| Lutheran | B | ADIPONECTIN      | -0.02 (-0.06 - 0.02)  | 0.406 | 0.406 | FALSE | FALSE | Converged |
| Lutheran | B | ADIPSIN          | -0.01 (-0.03 - 0.02)  | 0.654 | 0.654 | FALSE | FALSE | Converged |
| Lutheran | B | AMYLIN           | -0.01 (-0.07 - 0.06)  | 0.849 | 0.849 | FALSE | FALSE | Converged |
| Lutheran | B | BCA 1            | 0.02 (-0.00 - 0.04)   | 0.097 | 0.097 | FALSE | FALSE | Converged |
| Lutheran | B | C PEPTIDE        | 0.01 (-0.04 - 0.07)   | 0.607 | 0.607 | FALSE | FALSE | Converged |
| Lutheran | B | CCL19 MIP3B      | 0.01 (-0.01 - 0.03)   | 0.298 | 0.298 | FALSE | FALSE | Converged |
| Lutheran | B | CCL20 MIP3A      | 0.02 (-0.02 - 0.06)   | 0.310 | 0.310 | FALSE | FALSE | Converged |
| Lutheran | B | CRP              | 0.06 (0.01 - 0.10)    | 0.010 | 0.010 | FALSE | FALSE | Converged |
| Lutheran | B | CTACK            | 0.01 (-0.00 - 0.02)   | 0.137 | 0.137 | FALSE | FALSE | Converged |
| Lutheran | B | CXCL11   TAC     | 0.03 (0.00 - 0.05)    | 0.049 | 0.049 | FALSE | FALSE | Converged |
| Lutheran | B | CXCL6 GCP2       | 0.01 (-0.01 - 0.03)   | 0.221 | 0.221 | FALSE | FALSE | Converged |
| Lutheran | B | CXCL9 MIG        | 0.01 (-0.02 - 0.03)   | 0.471 | 0.471 | FALSE | FALSE | Converged |
| Lutheran | B | EGF              | -0.01 (-0.05 - 0.04)  | 0.729 | 0.729 | FALSE | FALSE | Converged |
| Lutheran | B | ENA 78           | 0.00 (-0.02 - 0.03)   | 0.812 | 0.812 | FALSE | FALSE | Converged |
| Lutheran | B | EOTAXIN 2        | -0.01 (-0.04 - 0.02)  | 0.456 | 0.456 | FALSE | FALSE | Converged |
| Lutheran | B | EOTAXIN          | 0.00 (-0.02 - 0.02)   | 0.805 | 0.805 | FALSE | FALSE | Converged |
| Lutheran | B | G CSF            | 0.03 (-0.01 - 0.06)   | 0.174 | 0.174 | FALSE | FALSE | Converged |
| Lutheran | B | GIP              | 0.04 (-0.05 - 0.12)   | 0.407 | 0.407 | FALSE | FALSE | Converged |
| Lutheran | B | GRO              | -0.00 (-0.02 - 0.01)  | 0.617 | 0.617 | FALSE | FALSE | Converged |
| Lutheran | B | IL 13            | 0.20 (-0.25 - 0.65)   | 0.380 | 0.380 | FALSE | FALSE | Converged |
| Lutheran | B | IL 16            | -0.01 (-0.05 - 0.04)  | 0.695 | 0.695 | FALSE | FALSE | Converged |
| Lutheran | B | IL 17            | 0.05 (-0.03 - 0.14)   | 0.231 | 0.231 | FALSE | FALSE | Converged |
| Lutheran | B | IL 23            | 0.19 (-0.18 - 0.57)   | 0.305 | 0.305 | FALSE | FALSE | Converged |
| Lutheran | B | IL 8             | 0.01 (-0.03 - 0.04)   | 0.629 | 0.629 | FALSE | FALSE | Converged |
| Lutheran | B | INSULIN          | 0.03 (-0.05 - 0.10)   | 0.484 | 0.484 | FALSE | FALSE | Converged |
| Lutheran | B | IP 10            | 0.01 (-0.01 - 0.03)   | 0.272 | 0.272 | FALSE | FALSE | Converged |
| Lutheran | B | LEPTIN           | 0.00 (-0.08 - 0.08)   | 0.988 | 0.988 | FALSE | FALSE | Converged |
| Lutheran | B | LIPOCALIN 2 NGAL | 0.03 (-0.00 - 0.07)   | 0.073 | 0.073 | FALSE | FALSE | Converged |
| Lutheran | B | MCP 1            | -0.00 (-0.02 - 0.01)  | 0.821 | 0.821 | FALSE | FALSE | Converged |
| Lutheran | B | MCP 2            | -0.01 (-0.04 - 0.02)  | 0.545 | 0.545 | FALSE | FALSE | Converged |
| Lutheran | B | MCP 4            | -0.02 (-0.06 - 0.01)  | 0.156 | 0.156 | FALSE | FALSE | Converged |
| Lutheran | B | MDC              | 0.00 (-0.01 - 0.02)   | 0.703 | 0.703 | FALSE | FALSE | Converged |
| Lutheran | B | MIP 1B           | 0.01 (-0.02 - 0.04)   | 0.588 | 0.588 | FALSE | FALSE | Converged |
| Lutheran | B | MIP 1D           | -0.01 (-0.03 - 0.02)  | 0.499 | 0.499 | FALSE | FALSE | Converged |
| Lutheran | B | PAI 1            | 0.01 (-0.02 - 0.04)   | 0.440 | 0.440 | FALSE | FALSE | Converged |
| Lutheran | B | PP               | -0.02 (-0.09 - 0.06)  | 0.648 | 0.648 | FALSE | FALSE | Converged |
| Lutheran | B | RESISTIN         | 0.01 (-0.02 - 0.04)   | 0.619 | 0.619 | FALSE | FALSE | Converged |
| Lutheran | B | SAA              | 0.05 (-0.00 - 0.10)   | 0.071 | 0.071 | FALSE | FALSE | Converged |

|          |   |                  |                       |       |       |       |       |           |
|----------|---|------------------|-----------------------|-------|-------|-------|-------|-----------|
| Lutheran | B | SAP              | 0.01 (-0.00 -0.03)    | 0.065 | 0.065 | FALSE | FALSE | Converged |
| Lutheran | B | SDF 1A B         | -0.00 (-0.02 -0.01)   | 0.651 | 0.651 | FALSE | FALSE | Converged |
| Lutheran | B | SEGFR            | -0.00 (-0.01 -0.01)   | 0.975 | 0.975 | FALSE | FALSE | Converged |
| Lutheran | B | SGP130           | 0.01 (-0.00 -0.02)    | 0.285 | 0.285 | FALSE | FALSE | Converged |
| Lutheran | B | SIL4R            | -0.01 (-0.02 -0.01)   | 0.208 | 0.208 | FALSE | FALSE | Converged |
| Lutheran | B | SIL6R            | 0.01 (-0.00 -0.02)    | 0.168 | 0.168 | FALSE | FALSE | Converged |
| Lutheran | B | SILRII           | -0.01 (-0.03 -0.00)   | 0.136 | 0.136 | FALSE | FALSE | Converged |
| Lutheran | B | STNFRI           | 0.00 (-0.01 -0.02)    | 0.458 | 0.458 | FALSE | FALSE | Converged |
| Lutheran | B | STNFRII          | 0.01 (-0.01 -0.02)    | 0.340 | 0.340 | FALSE | FALSE | Converged |
| Lutheran | B | SVEGFR2          | -0.00 (-0.01 -0.01)   | 0.923 | 0.923 | FALSE | FALSE | Converged |
| Lutheran | B | SVEGFR3          | 0.01 (-0.02 -0.04)    | 0.423 | 0.423 | FALSE | FALSE | Converged |
| Lutheran | B | TARC             | -0.00 (-0.03 -0.02)   | 0.807 | 0.807 | FALSE | FALSE | Converged |
| Lutheran | B | TGF A            | 0.03 (-0.02 -0.07)    | 0.194 | 0.194 | FALSE | FALSE | Converged |
| Lutheran | B | TGF B1           | -0.06 (-0.11 - -0.01) | 0.018 | 0.018 | FALSE | FALSE | Converged |
| Lutheran | B | TNFA             | -0.01 (-0.03 -0.02)   | 0.608 | 0.608 | FALSE | FALSE | Converged |
| Lutheran | B | TPO              | 0.02 (-0.05 -0.08)    | 0.635 | 0.635 | FALSE | FALSE | Converged |
| Lutheran | B | TRAIL            | 0.01 (-0.02 -0.03)    | 0.623 | 0.623 | FALSE | FALSE | Converged |
| Lutheran | B | VEGF             | 0.02 (-0.04 -0.08)    | 0.460 | 0.460 | FALSE | FALSE | Converged |
| Lutheran | B | X6CKINE          | -0.03 (-0.07 -0.01)   | 0.111 | 0.111 | FALSE | FALSE | Converged |
| Duffy    | B | ADIPONECTIN      | -0.00 (-0.03 -0.02)   | 0.782 | 0.782 | FALSE | FALSE | Converged |
| Duffy    | B | ADIPSIN          | 0.00 (-0.02 -0.02)    | 0.982 | 0.982 | FALSE | FALSE | Converged |
| Duffy    | B | AMYLIN           | -0.01 (-0.06 -0.03)   | 0.534 | 0.534 | FALSE | FALSE | Converged |
| Duffy    | B | BCA 1            | -0.01 (-0.02 -0.01)   | 0.271 | 0.271 | FALSE | FALSE | Converged |
| Duffy    | B | C PEPTIDE        | 0.01 (-0.03 -0.04)    | 0.793 | 0.793 | FALSE | FALSE | Converged |
| Duffy    | B | CCL19 MIP3B      | -0.01 (-0.03 -0.00)   | 0.149 | 0.149 | FALSE | FALSE | Converged |
| Duffy    | B | CCL20 MIP3A      | -0.01 (-0.04 -0.02)   | 0.463 | 0.463 | FALSE | FALSE | Converged |
| Duffy    | B | CRP              | -0.01 (-0.04 -0.03)   | 0.707 | 0.707 | FALSE | FALSE | Converged |
| Duffy    | B | CTACK            | -0.00 (-0.01 -0.01)   | 0.864 | 0.864 | FALSE | FALSE | Converged |
| Duffy    | B | CXCL11   TAC     | 0.03 (0.01 -0.05)     | 0.003 | 0.003 | FALSE | FALSE | Converged |
| Duffy    | B | CXCL6 GCP2       | 0.06 (0.05 -0.07)     | 0.000 | 0.000 | TRUE  | FALSE | Converged |
| Duffy    | B | CXCL9 MIG        | -0.00 (-0.02 -0.02)   | 0.826 | 0.826 | FALSE | FALSE | Converged |
| Duffy    | B | EGF              | -0.02 (-0.05 -0.01)   | 0.235 | 0.235 | FALSE | FALSE | Converged |
| Duffy    | B | ENA 78           | 0.07 (0.06 -0.09)     | 0.000 | 0.000 | TRUE  | FALSE | Converged |
| Duffy    | B | EOTAXIN 2        | 0.02 (-0.00 -0.04)    | 0.104 | 0.104 | FALSE | FALSE | Converged |
| Duffy    | B | EOTAXIN          | 0.12 (0.10 -0.13)     | 0.000 | 0.000 | TRUE  | FALSE | Converged |
| Duffy    | B | G CSF            | -0.01 (-0.04 -0.01)   | 0.295 | 0.295 | FALSE | FALSE | Converged |
| Duffy    | B | GIP              | 0.00 (-0.06 -0.06)    | 0.961 | 0.961 | FALSE | FALSE | Converged |
| Duffy    | B | GRO              | 0.06 (0.05 -0.07)     | 0.000 | 0.000 | TRUE  | FALSE | Converged |
| Duffy    | B | IL 13            | 0.12 (-0.18 -0.42)    | 0.423 | 0.423 | FALSE | FALSE | Converged |
| Duffy    | B | IL 16            | -0.00 (-0.04 -0.03)   | 0.841 | 0.841 | FALSE | FALSE | Converged |
| Duffy    | B | IL 17            | -0.08 (-0.15 - -0.02) | 0.008 | 0.008 | FALSE | FALSE | Converged |
| Duffy    | B | IL 23            | 0.07 (-0.21 -0.34)    | 0.632 | 0.632 | FALSE | FALSE | Converged |
| Duffy    | B | IL 8             | 0.05 (0.03 -0.08)     | 0.000 | 0.000 | TRUE  | FALSE | Converged |
| Duffy    | B | INSULIN          | -0.02 (-0.07 -0.03)   | 0.423 | 0.423 | FALSE | FALSE | Converged |
| Duffy    | B | IP 10            | -0.00 (-0.02 -0.01)   | 0.545 | 0.545 | FALSE | FALSE | Converged |
| Duffy    | B | LEPTIN           | -0.01 (-0.06 -0.04)   | 0.774 | 0.774 | FALSE | FALSE | Converged |
| Duffy    | B | LIPOCALIN 2 NGAL | 0.01 (-0.02 -0.04)    | 0.664 | 0.664 | FALSE | FALSE | Converged |
| Duffy    | B | MCP 1            | 0.12 (0.11 -0.13)     | 0.000 | 0.000 | TRUE  | FALSE | Converged |
| Duffy    | B | MCP 2            | -0.03 (-0.05 - -0.01) | 0.001 | 0.001 | FALSE | FALSE | Converged |
| Duffy    | B | MCP 4            | 0.15 (0.12 -0.17)     | 0.000 | 0.000 | TRUE  | FALSE | Converged |
| Duffy    | B | MDC              | 0.00 (-0.01 -0.01)    | 0.922 | 0.922 | FALSE | FALSE | Converged |
| Duffy    | B | MIP 1B           | 0.02 (0.00 -0.04)     | 0.041 | 0.041 | FALSE | FALSE | Converged |
| Duffy    | B | MIP 1D           | 0.01 (-0.00 -0.03)    | 0.120 | 0.120 | FALSE | FALSE | Converged |
| Duffy    | B | PAI 1            | -0.00 (-0.02 -0.02)   | 0.937 | 0.937 | FALSE | FALSE | Converged |
| Duffy    | B | PP               | 0.01 (-0.05 -0.07)    | 0.677 | 0.677 | FALSE | FALSE | Converged |
| Duffy    | B | RESISTIN         | 0.02 (-0.00 -0.04)    | 0.099 | 0.099 | FALSE | FALSE | Converged |
| Duffy    | B | SAA              | -0.03 (-0.06 -0.01)   | 0.129 | 0.129 | FALSE | FALSE | Converged |
| Duffy    | B | SAP              | -0.01 (-0.02 -0.00)   | 0.149 | 0.149 | FALSE | FALSE | Converged |
| Duffy    | B | SDF 1A B         | 0.01 (-0.00 -0.02)    | 0.266 | 0.266 | FALSE | FALSE | Converged |
| Duffy    | B | SEGFR            | -0.00 (-0.01 -0.01)   | 0.691 | 0.691 | FALSE | FALSE | Converged |
| Duffy    | B | SGP130           | -0.00 (-0.01 -0.01)   | 0.982 | 0.982 | FALSE | FALSE | Converged |
| Duffy    | B | SIL4R            | 0.01 (0.00 -0.02)     | 0.027 | 0.027 | FALSE | FALSE | Converged |
| Duffy    | B | SIL6R            | 0.00 (-0.00 -0.01)    | 0.376 | 0.376 | FALSE | FALSE | Converged |
| Duffy    | B | SILRII           | -0.00 (-0.01 -0.01)   | 0.712 | 0.712 | FALSE | FALSE | Converged |
| Duffy    | B | STNFRI           | -0.00 (-0.01 -0.01)   | 0.816 | 0.816 | FALSE | FALSE | Converged |
| Duffy    | B | STNFRII          | -0.00 (-0.01 -0.01)   | 0.720 | 0.720 | FALSE | FALSE | Converged |
| Duffy    | B | SVEGFR2          | 0.00 (-0.01 -0.01)    | 0.822 | 0.822 | FALSE | FALSE | Converged |
| Duffy    | B | SVEGFR3          | 0.01 (-0.01 -0.04)    | 0.191 | 0.191 | FALSE | FALSE | Converged |
| Duffy    | B | TARC             | 0.05 (0.03 -0.07)     | 0.000 | 0.000 | TRUE  | FALSE | Converged |

|          |          |             |                              |       |       |       |       |                  |
|----------|----------|-------------|------------------------------|-------|-------|-------|-------|------------------|
| Duffy    | B        | TGF A       | -0.01 (-0.04 - 0.02)         | 0.631 | 0.631 | FALSE | FALSE | Converged        |
| Duffy    | B        | TGF B1      | -0.01 (-0.04 - 0.03)         | 0.740 | 0.740 | FALSE | FALSE | Converged        |
| Duffy    | B        | TNFA        | -0.00 (-0.02 - 0.01)         | 0.849 | 0.849 | FALSE | FALSE | Converged        |
| Duffy    | B        | TPO         | -0.06 (-0.10 - -0.01)        | 0.024 | 0.024 | FALSE | FALSE | Converged        |
| Duffy    | B        | TRAIL       | -0.01 (-0.03 - 0.01)         | 0.229 | 0.229 | FALSE | FALSE | Converged        |
| Duffy    | B        | VEGF        | -0.01 (-0.05 - 0.03)         | 0.657 | 0.657 | FALSE | FALSE | Converged        |
| Duffy    | B        | X6CKINE     | 0.01 (-0.02 - 0.03)          | 0.588 | 0.588 | FALSE | FALSE | Converged        |
| Lewis    | Null     | FGF 2       | 2.51 (1.03 - 6.13)           | 0.044 | 0.044 | FALSE | TRUE  | Converged        |
| Lewis    | Null     | FLT 3L      | 15064.29 (6724.30 - 33 0.000 | 0.000 | 0.000 | FALSE | TRUE  | Did Not Converge |
| Lewis    | Null     | FRACTALKINE | 0.00 (0.00 - 0.00)           | 0.000 | 0.000 | FALSE | TRUE  | Did Not Converge |
| Lewis    | Null     | GLP 1       | 53371.84 (25316.53 - 1 0.000 | 0.000 | 0.000 | TRUE  | TRUE  | Converged        |
| Lewis    | Null     | GLUCAGON    | 24800.45 (8943.25 - 68 0.000 | 0.000 | 0.000 | FALSE | TRUE  | Did Not Converge |
| Lewis    | Null     | GM CSF      | 41131.74 (16591.97 - 1 0.000 | 0.000 | 0.000 | FALSE | TRUE  | Did Not Converge |
| Lewis    | Null     | IFNA2       | --                           | 0.000 | 0.000 | FALSE | TRUE  | Did Not Converge |
| Lewis    | Null     | IFNG        | 3.24 (0.75 - 13.91)          | 0.114 | 0.114 | FALSE | TRUE  | Converged        |
| Lewis    | Null     | IL 10       | 14661.90 (6715.55 - 32 0.000 | 0.000 | 0.000 | FALSE | TRUE  | Did Not Converge |
| Lewis    | Null     | IL 11       | 51169.96 (28923.25 - 9 0.000 | 0.000 | 0.000 | TRUE  | TRUE  | Converged        |
| Lewis    | Null     | IL 12P40    | 39656.57 (18580.87 - 8 0.000 | 0.000 | 0.000 | FALSE | TRUE  | Did Not Converge |
| Lewis    | Null     | IL 12P70    | 0.00 (0.00 - 0.00)           | 0.000 | 0.000 | FALSE | TRUE  | Did Not Converge |
| Lewis    | Null     | IL 15       | 1.30 (0.30 - 5.74)           | 0.728 | 0.728 | FALSE | TRUE  | Converged        |
| Lewis    | Null     | IL 1A       | 80403.83 (46230.79 - 1 0.000 | 0.000 | 0.000 | TRUE  | TRUE  | Converged        |
| Lewis    | Null     | IL 1B       | 1.03 (0.18 - 6.06)           | 0.971 | 0.971 | FALSE | TRUE  | Did Not Converge |
| Lewis    | Null     | IL 1RA      | 5537525.74 (368455.1 0.000   | 0.000 | 0.000 | FALSE | TRUE  | Did Not Converge |
| Lewis    | Null     | IL 2        | 50133.56 (27731.10 - 9 0.000 | 0.000 | 0.000 | TRUE  | TRUE  | Converged        |
| Lewis    | Null     | IL 29 IFNL1 | 1.44 (0.30 - 6.89)           | 0.649 | 0.649 | FALSE | TRUE  | Converged        |
| Lewis    | Null     | IL 33       | 1.00 (0.53 - 1.92)           | 0.990 | 0.990 | FALSE | TRUE  | Converged        |
| Lewis    | Null     | IL 4        | 21784.49 (9904.55 - 47 0.000 | 0.000 | 0.000 | FALSE | TRUE  | Did Not Converge |
| Lewis    | Null     | IL 5        | 0.00 (0.00 - 0.00)           | 0.000 | 0.000 | FALSE | TRUE  | Did Not Converge |
| Lewis    | Null     | IL 6        | 0.00 (0.00 - 0.00)           | 0.000 | 0.000 | FALSE | TRUE  | Did Not Converge |
| Lewis    | Null     | IL 7        | 44182.39 (10138.92 - 1 0.000 | 0.000 | 0.000 | FALSE | TRUE  | Did Not Converge |
| Lewis    | Null     | MCP 3       | 23.67 (4.33 - 129.50)        | 0.000 | 0.000 | FALSE | TRUE  | Did Not Converge |
| Lewis    | Null     | MIP 1A      | 0.31 (0.05 - 1.78)           | 0.188 | 0.188 | FALSE | TRUE  | Converged        |
| Lewis    | Null     | PYY         | 122202034871.95 (874 0.000   | 0.000 | 0.000 | FALSE | TRUE  | Did Not Converge |
| Lewis    | Null     | SCF         | 0.95 (0.51 - 1.76)           | 0.873 | 0.873 | FALSE | TRUE  | Converged        |
| Lewis    | Null     | SIL 2RA     | 37345.11 (20148.43 - 6 0.000 | 0.000 | 0.000 | TRUE  | TRUE  | Converged        |
| Lewis    | Null     | TNF B       | 0.80 (0.45 - 1.45)           | 0.469 | 0.469 | FALSE | TRUE  | Converged        |
| Lewis    | Null     | TSLP        | 1.28 (0.65 - 2.55)           | 0.475 | 0.475 | FALSE | TRUE  | Converged        |
| Lewis    | Null     | SCD40L      | 2.55 (0.86 - 7.58)           | 0.091 | 0.091 | FALSE | TRUE  | Converged        |
| Secretor | Secretor | FGF 2       | 1.06 (0.95 - 1.18)           | 0.334 | 0.334 | FALSE | TRUE  | Converged        |
| Secretor | Secretor | FLT 3L      | 0.79 (0.51 - 1.22)           | 0.287 | 0.287 | FALSE | TRUE  | Converged        |
| Secretor | Secretor | FRACTALKINE | 218584363547629404 0.000     | 0.000 | 0.000 | FALSE | TRUE  | Did Not Converge |
| Secretor | Secretor | GLP 1       | 0.73 (0.57 - 0.94)           | 0.014 | 0.014 | FALSE | TRUE  | Converged        |
| Secretor | Secretor | GLUCAGON    | 0.70 (0.51 - 0.98)           | 0.038 | 0.038 | FALSE | TRUE  | Converged        |
| Secretor | Secretor | GM CSF      | 0.99 (0.77 - 1.28)           | 0.960 | 0.960 | FALSE | TRUE  | Converged        |
| Secretor | Secretor | IFNA2       | 0.00 (0.00 - 0.00)           | 0.000 | 0.000 | FALSE | TRUE  | Did Not Converge |
| Secretor | Secretor | IFNG        | 0.93 (0.79 - 1.09)           | 0.372 | 0.372 | FALSE | TRUE  | Converged        |
| Secretor | Secretor | IL 10       | 0.98 (0.77 - 1.25)           | 0.863 | 0.863 | FALSE | TRUE  | Converged        |
| Secretor | Secretor | IL 11       | 0.92 (0.76 - 1.11)           | 0.380 | 0.380 | FALSE | TRUE  | Converged        |
| Secretor | Secretor | IL 12P40    | 1.27 (1.00 - 1.60)           | 0.047 | 0.047 | FALSE | TRUE  | Converged        |
| Secretor | Secretor | IL 12P70    | 0.00 (0.00 - 0.00)           | 0.000 | 0.000 | FALSE | TRUE  | Did Not Converge |
| Secretor | Secretor | IL 15       | 1.13 (0.93 - 1.37)           | 0.230 | 0.230 | FALSE | TRUE  | Converged        |
| Secretor | Secretor | IL 1A       | 1.24 (1.02 - 1.51)           | 0.033 | 0.033 | FALSE | TRUE  | Converged        |
| Secretor | Secretor | IL 1B       | 1.95 (0.66 - 5.79)           | 0.227 | 0.227 | FALSE | TRUE  | Did Not Converge |
| Secretor | Secretor | IL 1RA      | 11008093.93 (1754410 0.000   | 0.000 | 0.000 | FALSE | TRUE  | Did Not Converge |
| Secretor | Secretor | IL 2        | 1.04 (0.87 - 1.24)           | 0.673 | 0.673 | FALSE | TRUE  | Converged        |
| Secretor | Secretor | IL 29 IFNL1 | 0.99 (0.79 - 1.24)           | 0.908 | 0.908 | FALSE | TRUE  | Converged        |
| Secretor | Secretor | IL 33       | 1.06 (0.94 - 1.20)           | 0.320 | 0.320 | FALSE | TRUE  | Converged        |
| Secretor | Secretor | IL 4        | 0.87 (0.66 - 1.15)           | 0.332 | 0.332 | FALSE | TRUE  | Did Not Converge |
| Secretor | Secretor | IL 5        | 1.17 (0.32 - 4.27)           | 0.813 | 0.813 | FALSE | TRUE  | Did Not Converge |
| Secretor | Secretor | IL 6        | --                           | 0.000 | 0.000 | FALSE | TRUE  | Did Not Converge |
| Secretor | Secretor | IL 7        | 0.97 (0.64 - 1.48)           | 0.880 | 0.880 | FALSE | TRUE  | Did Not Converge |
| Secretor | Secretor | MCP 3       | 1.00 (0.93 - 1.08)           | 1.000 | 1.000 | FALSE | TRUE  | Converged        |
| Secretor | Secretor | MIP 1A      | 0.76 (0.57 - 1.02)           | 0.066 | 0.066 | FALSE | TRUE  | Converged        |
| Secretor | Secretor | PYY         | 2.04 (1.02 - 4.09)           | 0.043 | 0.043 | FALSE | TRUE  | Did Not Converge |
| Secretor | Secretor | SCF         | 1.02 (0.91 - 1.14)           | 0.769 | 0.769 | FALSE | TRUE  | Converged        |
| Secretor | Secretor | SIL 2RA     | 0.73 (0.54 - 0.99)           | 0.046 | 0.046 | FALSE | TRUE  | Converged        |
| Secretor | Secretor | TNF B       | 1.02 (0.91 - 1.14)           | 0.778 | 0.778 | FALSE | TRUE  | Converged        |
| Secretor | Secretor | TSLP        | 1.06 (0.93 - 1.21)           | 0.349 | 0.349 | FALSE | TRUE  | Converged        |
| Secretor | Secretor | SCD40L      | 0.96 (0.80 - 1.15)           | 0.673 | 0.673 | FALSE | TRUE  | Converged        |

|        |   |             |                      |       |       |       |      |                  |
|--------|---|-------------|----------------------|-------|-------|-------|------|------------------|
| Kidd   | B | FGF 2       | 0.99 (0.86 - 1.13)   | 0.875 | 0.875 | FALSE | TRUE | Converged        |
| Kidd   | B | FLT3L       | 0.83 (0.53 - 1.30)   | 0.407 | 0.407 | FALSE | TRUE | Converged        |
| Kidd   | B | FRACTALKINE | 0.00 (0.00 - 0.00)   | 0.000 | 0.000 | FALSE | TRUE | Did Not Converge |
| Kidd   | B | GLP 1       | 0.91 (0.66 - 1.24)   | 0.541 | 0.541 | FALSE | TRUE | Converged        |
| Kidd   | B | GLUCAGON    | 1.16 (0.81 - 1.66)   | 0.432 | 0.432 | FALSE | TRUE | Converged        |
| Kidd   | B | GM CSF      | 0.98 (0.72 - 1.33)   | 0.876 | 0.876 | FALSE | TRUE | Converged        |
| Kidd   | B | IFNA2       | 4.06 (2.34 - 7.04)   | 0.000 | 0.000 | FALSE | TRUE | Did Not Converge |
| Kidd   | B | IFNG        | 1.03 (0.84 - 1.25)   | 0.810 | 0.810 | FALSE | TRUE | Converged        |
| Kidd   | B | IL 10       | 1.02 (0.77 - 1.35)   | 0.907 | 0.907 | FALSE | TRUE | Converged        |
| Kidd   | B | IL 11       | 0.91 (0.72 - 1.15)   | 0.427 | 0.427 | FALSE | TRUE | Converged        |
| Kidd   | B | IL 12P40    | 1.13 (0.84 - 1.51)   | 0.412 | 0.412 | FALSE | TRUE | Converged        |
| Kidd   | B | IL 12P70    | --                   | 0.000 | 0.000 | FALSE | TRUE | Did Not Converge |
| Kidd   | B | IL 15       | 1.01 (0.79 - 1.29)   | 0.948 | 0.948 | FALSE | TRUE | Converged        |
| Kidd   | B | IL 1A       | 0.96 (0.76 - 1.22)   | 0.747 | 0.747 | FALSE | TRUE | Converged        |
| Kidd   | B | IL 1B       | 1.19 (0.36 - 3.99)   | 0.776 | 0.776 | FALSE | TRUE | Did Not Converge |
| Kidd   | B | IL 1RA      | 336383205499.74 (197 | 0.000 | 0.000 | FALSE | TRUE | Did Not Converge |
| Kidd   | B | IL 2        | 1.00 (0.81 - 1.24)   | 0.997 | 0.997 | FALSE | TRUE | Converged        |
| Kidd   | B | IL 29 IFNL1 | 1.07 (0.82 - 1.39)   | 0.611 | 0.611 | FALSE | TRUE | Converged        |
| Kidd   | B | IL 33       | 0.85 (0.73 - 0.99)   | 0.033 | 0.033 | FALSE | TRUE | Converged        |
| Kidd   | B | IL 4        | 0.99 (0.70 - 1.40)   | 0.949 | 0.949 | FALSE | TRUE | Did Not Converge |
| Kidd   | B | IL 5        | 0.63 (0.19 - 2.13)   | 0.458 | 0.458 | FALSE | TRUE | Did Not Converge |
| Kidd   | B | IL 6        | --                   | 0.498 | 0.498 | FALSE | TRUE | Did Not Converge |
| Kidd   | B | IL 7        | 1.21 (0.71 - 2.06)   | 0.479 | 0.479 | FALSE | TRUE | Did Not Converge |
| Kidd   | B | MCP 3       | 0.00 (0.00 - 0.00)   | 0.000 | 0.000 | FALSE | TRUE | Did Not Converge |
| Kidd   | B | MIP 1A      | 1.15 (0.83 - 1.58)   | 0.405 | 0.405 | FALSE | TRUE | Converged        |
| Kidd   | B | PYY         | 0.00 (0.00 - 0.00)   | 0.000 | 0.000 | FALSE | TRUE | Did Not Converge |
| Kidd   | B | SCF         | 0.90 (0.78 - 1.03)   | 0.117 | 0.117 | FALSE | TRUE | Converged        |
| Kidd   | B | SIL 2RA     | 1.04 (0.70 - 1.52)   | 0.855 | 0.855 | FALSE | TRUE | Converged        |
| Kidd   | B | TNF B       | 0.91 (0.80 - 1.05)   | 0.192 | 0.192 | FALSE | TRUE | Converged        |
| Kidd   | B | TSLP        | 1.04 (0.88 - 1.23)   | 0.620 | 0.620 | FALSE | TRUE | Converged        |
| Kidd   | B | SCD40L      | 0.92 (0.74 - 1.14)   | 0.440 | 0.440 | FALSE | TRUE | Converged        |
| Colton | B | FGF 2       | 1.08 (0.88 - 1.32)   | 0.469 | 0.469 | FALSE | TRUE | Converged        |
| Colton | B | FLT3L       | 1.82 (1.02 - 3.26)   | 0.042 | 0.042 | FALSE | TRUE | Converged        |
| Colton | B | FRACTALKINE | --                   | 0.000 | 0.000 | FALSE | TRUE | Did Not Converge |
| Colton | B | GLP 1       | 1.57 (1.02 - 2.43)   | 0.042 | 0.042 | FALSE | TRUE | Converged        |
| Colton | B | GLUCAGON    | 0.61 (0.30 - 1.24)   | 0.174 | 0.174 | FALSE | TRUE | Converged        |
| Colton | B | GM CSF      | 0.72 (0.43 - 1.22)   | 0.221 | 0.221 | FALSE | TRUE | Converged        |
| Colton | B | IFNA2       | 0.00 (0.00 - 0.00)   | 0.000 | 0.000 | FALSE | TRUE | Did Not Converge |
| Colton | B | IFNG        | 1.15 (0.83 - 1.60)   | 0.404 | 0.404 | FALSE | TRUE | Converged        |
| Colton | B | IL 10       | 1.19 (0.80 - 1.78)   | 0.385 | 0.385 | FALSE | TRUE | Converged        |
| Colton | B | IL 11       | 1.06 (0.73 - 1.52)   | 0.771 | 0.771 | FALSE | TRUE | Converged        |
| Colton | B | IL 12P40    | 0.77 (0.47 - 1.26)   | 0.301 | 0.301 | FALSE | TRUE | Converged        |
| Colton | B | IL 12P70    | --                   | 0.816 | 0.816 | FALSE | TRUE | Did Not Converge |
| Colton | B | IL 15       | 0.86 (0.58 - 1.29)   | 0.477 | 0.477 | FALSE | TRUE | Converged        |
| Colton | B | IL 1A       | 1.12 (0.78 - 1.60)   | 0.542 | 0.542 | FALSE | TRUE | Converged        |
| Colton | B | IL 1B       | 0.50 (0.13 - 1.95)   | 0.321 | 0.321 | FALSE | TRUE | Did Not Converge |
| Colton | B | IL 1RA      | 0.00 (0.00 - 0.00)   | 0.000 | 0.000 | FALSE | TRUE | Did Not Converge |
| Colton | B | IL 2        | 0.87 (0.61 - 1.24)   | 0.438 | 0.438 | FALSE | TRUE | Converged        |
| Colton | B | IL 29 IFNL1 | 0.99 (0.67 - 1.46)   | 0.960 | 0.960 | FALSE | TRUE | Converged        |
| Colton | B | IL 33       | 0.75 (0.58 - 0.96)   | 0.020 | 0.020 | FALSE | TRUE | Converged        |
| Colton | B | IL 4        | 0.91 (0.53 - 1.57)   | 0.736 | 0.736 | FALSE | TRUE | Did Not Converge |
| Colton | B | IL 5        | 0.70 (0.13 - 3.77)   | 0.674 | 0.674 | FALSE | TRUE | Did Not Converge |
| Colton | B | IL 6        | --                   | 0.000 | 0.000 | FALSE | TRUE | Did Not Converge |
| Colton | B | IL 7        | 0.72 (0.35 - 1.46)   | 0.362 | 0.362 | FALSE | TRUE | Did Not Converge |
| Colton | B | MCP 3       | --                   | 0.000 | 0.000 | FALSE | TRUE | Did Not Converge |
| Colton | B | MIP 1A      | 1.38 (0.81 - 2.35)   | 0.235 | 0.235 | FALSE | TRUE | Converged        |
| Colton | B | PYY         | --                   | 0.000 | 0.000 | FALSE | TRUE | Did Not Converge |
| Colton | B | SCF         | 0.95 (0.77 - 1.16)   | 0.595 | 0.595 | FALSE | TRUE | Converged        |
| Colton | B | SIL 2RA     | 0.81 (0.42 - 1.57)   | 0.537 | 0.537 | FALSE | TRUE | Converged        |
| Colton | B | TNF B       | 1.14 (0.93 - 1.40)   | 0.204 | 0.204 | FALSE | TRUE | Converged        |
| Colton | B | TSLP        | 0.91 (0.71 - 1.17)   | 0.461 | 0.461 | FALSE | TRUE | Converged        |
| Colton | B | SCD40L      | 1.05 (0.77 - 1.45)   | 0.746 | 0.746 | FALSE | TRUE | Converged        |
| Knops  | B | FGF 2       | 1.02 (0.83 - 1.26)   | 0.845 | 0.845 | FALSE | TRUE | Converged        |
| Knops  | B | FLT3L       | 0.80 (0.38 - 1.66)   | 0.544 | 0.544 | FALSE | TRUE | Converged        |
| Knops  | B | FRACTALKINE | --                   | 0.297 | 0.297 | FALSE | TRUE | Did Not Converge |
| Knops  | B | GLP 1       | 0.90 (0.58 - 1.39)   | 0.635 | 0.635 | FALSE | TRUE | Converged        |
| Knops  | B | GLUCAGON    | 0.82 (0.47 - 1.45)   | 0.504 | 0.504 | FALSE | TRUE | Converged        |
| Knops  | B | GM CSF      | 1.10 (0.71 - 1.71)   | 0.672 | 0.672 | FALSE | TRUE | Converged        |
| Knops  | B | IFNA2       | 0.00 (0.00 - 0.00)   | 0.000 | 0.000 | FALSE | TRUE | Did Not Converge |

|          |   |             |                        |       |       |       |      |                  |
|----------|---|-------------|------------------------|-------|-------|-------|------|------------------|
| Knops    | B | IFNG        | 0.83 (0.60 - 1.14)     | 0.248 | 0.248 | FALSE | TRUE | Converged        |
| Knops    | B | IL 10       | 1.05 (0.69 - 1.61)     | 0.810 | 0.810 | FALSE | TRUE | Converged        |
| Knops    | B | IL 11       | 1.12 (0.79 - 1.60)     | 0.521 | 0.521 | FALSE | TRUE | Converged        |
| Knops    | B | IL 12P40    | 1.30 (0.87 - 1.95)     | 0.194 | 0.194 | FALSE | TRUE | Converged        |
| Knops    | B | IL 12P70    | --                     | 0.000 | 0.000 | FALSE | TRUE | Did Not Converge |
| Knops    | B | IL 15       | 1.14 (0.81 - 1.60)     | 0.447 | 0.447 | FALSE | TRUE | Converged        |
| Knops    | B | IL 1A       | 1.45 (1.06 - 1.98)     | 0.021 | 0.021 | FALSE | TRUE | Converged        |
| Knops    | B | IL 1B       | 580502.16 (228353.43   | 0.000 | 0.000 | FALSE | TRUE | Did Not Converge |
| Knops    | B | IL 1RA      | 0.00 (0.00 - 0.00)     | 0.000 | 0.000 | FALSE | TRUE | Did Not Converge |
| Knops    | B | IL 2        | 1.43 (1.06 - 1.92)     | 0.018 | 0.018 | FALSE | TRUE | Converged        |
| Knops    | B | IL 29 IFNL1 | 1.11 (0.75 - 1.65)     | 0.600 | 0.600 | FALSE | TRUE | Converged        |
| Knops    | B | IL 33       | 1.10 (0.88 - 1.39)     | 0.405 | 0.405 | FALSE | TRUE | Converged        |
| Knops    | B | IL 4        | 1.76 (1.08 - 2.84)     | 0.022 | 0.022 | FALSE | TRUE | Converged        |
| Knops    | B | IL 5        | 0.99 (0.17 - 5.75)     | 0.994 | 0.994 | FALSE | TRUE | Did Not Converge |
| Knops    | B | IL 6        | 0.00 (0.00 - 1.72)     | 0.064 | 0.064 | FALSE | TRUE | Did Not Converge |
| Knops    | B | IL 7        | 1.19 (0.64 - 2.22)     | 0.578 | 0.578 | FALSE | TRUE | Did Not Converge |
| Knops    | B | MCP 3       | --                     | 0.000 | 0.000 | FALSE | TRUE | Did Not Converge |
| Knops    | B | MIP 1A      | 1.13 (0.70 - 1.82)     | 0.610 | 0.610 | FALSE | TRUE | Converged        |
| Knops    | B | PYY         | 0.00 (0.00 - 0.00)     | 0.000 | 0.000 | FALSE | TRUE | Did Not Converge |
| Knops    | B | SCF         | 1.26 (1.02 - 1.56)     | 0.034 | 0.034 | FALSE | TRUE | Converged        |
| Knops    | B | SIL 2RA     | 1.71 (1.06 - 2.76)     | 0.028 | 0.028 | FALSE | TRUE | Converged        |
| Knops    | B | TNF B       | 1.07 (0.87 - 1.32)     | 0.511 | 0.511 | FALSE | TRUE | Converged        |
| Knops    | B | TSLP        | 1.07 (0.83 - 1.38)     | 0.595 | 0.595 | FALSE | TRUE | Converged        |
| Knops    | B | SCD40L      | 0.93 (0.68 - 1.29)     | 0.678 | 0.678 | FALSE | TRUE | Converged        |
| Kell     | K | FGF 2       | 1.18 (0.98 - 1.42)     | 0.087 | 0.087 | FALSE | TRUE | Converged        |
| Kell     | K | FLT3L       | 1.59 (0.85 - 2.95)     | 0.146 | 0.146 | FALSE | TRUE | Converged        |
| Kell     | K | FRACTALKINE | --                     | 0.000 | 0.000 | FALSE | TRUE | Did Not Converge |
| Kell     | K | GLP 1       | 0.87 (0.52 - 1.45)     | 0.587 | 0.587 | FALSE | TRUE | Converged        |
| Kell     | K | GLUCAGON    | 1.12 (0.64 - 1.97)     | 0.688 | 0.688 | FALSE | TRUE | Converged        |
| Kell     | K | GM CSF      | 1.58 (0.97 - 2.56)     | 0.064 | 0.064 | FALSE | TRUE | Converged        |
| Kell     | K | IFNA2       | --                     | 0.000 | 0.000 | FALSE | TRUE | Did Not Converge |
| Kell     | K | IFNG        | 0.95 (0.70 - 1.29)     | 0.735 | 0.735 | FALSE | TRUE | Converged        |
| Kell     | K | IL 10       | 0.89 (0.58 - 1.35)     | 0.585 | 0.585 | FALSE | TRUE | Converged        |
| Kell     | K | IL 11       | 1.00 (0.70 - 1.42)     | 0.998 | 0.998 | FALSE | TRUE | Converged        |
| Kell     | K | IL 12P40    | 1.19 (0.76 - 1.87)     | 0.456 | 0.456 | FALSE | TRUE | Converged        |
| Kell     | K | IL 12P70    | 1108503.58 (259114.0   | 0.000 | 0.000 | FALSE | TRUE | Did Not Converge |
| Kell     | K | IL 15       | 0.98 (0.69 - 1.40)     | 0.910 | 0.910 | FALSE | TRUE | Converged        |
| Kell     | K | IL 1A       | 0.79 (0.54 - 1.16)     | 0.233 | 0.233 | FALSE | TRUE | Converged        |
| Kell     | K | IL 1B       | 1.86 (0.36 - 9.59)     | 0.460 | 0.460 | FALSE | TRUE | Did Not Converge |
| Kell     | K | IL 1RA      | 0.00 (0.00 - 0.00)     | 0.000 | 0.000 | FALSE | TRUE | Did Not Converge |
| Kell     | K | IL 2        | 0.80 (0.57 - 1.13)     | 0.210 | 0.210 | FALSE | TRUE | Converged        |
| Kell     | K | IL 29 IFNL1 | 0.97 (0.68 - 1.38)     | 0.860 | 0.860 | FALSE | TRUE | Converged        |
| Kell     | K | IL 33       | 0.86 (0.69 - 1.07)     | 0.172 | 0.172 | FALSE | TRUE | Converged        |
| Kell     | K | IL 4        | 0.34 (0.15 - 0.77)     | 0.010 | 0.010 | FALSE | TRUE | Did Not Converge |
| Kell     | K | IL 5        | 1.67 (0.31 - 9.04)     | 0.550 | 0.550 | FALSE | TRUE | Did Not Converge |
| Kell     | K | IL 6        | 307113.59 (82.90 - 113 | 0.003 | 0.003 | FALSE | TRUE | Did Not Converge |
| Kell     | K | IL 7        | 1.28 (0.55 - 3.01)     | 0.569 | 0.569 | FALSE | TRUE | Did Not Converge |
| Kell     | K | MCP 3       | --                     | 0.000 | 0.000 | FALSE | TRUE | Did Not Converge |
| Kell     | K | MIP 1A      | 1.10 (0.66 - 1.84)     | 0.711 | 0.711 | FALSE | TRUE | Converged        |
| Kell     | K | PYY         | --                     | 0.000 | 0.000 | FALSE | TRUE | Did Not Converge |
| Kell     | K | SCF         | 0.93 (0.77 - 1.14)     | 0.496 | 0.496 | FALSE | TRUE | Converged        |
| Kell     | K | SIL 2RA     | 0.64 (0.31 - 1.33)     | 0.236 | 0.236 | FALSE | TRUE | Converged        |
| Kell     | K | TNF B       | 0.90 (0.74 - 1.09)     | 0.280 | 0.280 | FALSE | TRUE | Converged        |
| Kell     | K | TSLP        | 0.95 (0.76 - 1.20)     | 0.694 | 0.694 | FALSE | TRUE | Converged        |
| Kell     | K | SCD40L      | 1.06 (0.75 - 1.50)     | 0.759 | 0.759 | FALSE | TRUE | Converged        |
| Dombrock | B | FGF 2       | 0.91 (0.78 - 1.05)     | 0.206 | 0.206 | FALSE | TRUE | Converged        |
| Dombrock | B | FLT3L       | 0.69 (0.38 - 1.23)     | 0.205 | 0.205 | FALSE | TRUE | Converged        |
| Dombrock | B | FRACTALKINE | --                     | 0.000 | 0.000 | FALSE | TRUE | Did Not Converge |
| Dombrock | B | GLP 1       | 0.99 (0.71 - 1.39)     | 0.961 | 0.961 | FALSE | TRUE | Converged        |
| Dombrock | B | GLUCAGON    | 1.45 (0.94 - 2.23)     | 0.090 | 0.090 | FALSE | TRUE | Converged        |
| Dombrock | B | GM CSF      | 0.81 (0.57 - 1.15)     | 0.234 | 0.234 | FALSE | TRUE | Converged        |
| Dombrock | B | IFNA2       | 0.00 (0.00 - 0.00)     | 0.000 | 0.000 | FALSE | TRUE | Did Not Converge |
| Dombrock | B | IFNG        | 1.02 (0.82 - 1.28)     | 0.844 | 0.844 | FALSE | TRUE | Converged        |
| Dombrock | B | IL 10       | 1.26 (0.93 - 1.69)     | 0.137 | 0.137 | FALSE | TRUE | Converged        |
| Dombrock | B | IL 11       | 1.11 (0.85 - 1.43)     | 0.442 | 0.442 | FALSE | TRUE | Converged        |
| Dombrock | B | IL 12P40    | 0.97 (0.71 - 1.32)     | 0.851 | 0.851 | FALSE | TRUE | Converged        |
| Dombrock | B | IL 12P70    | 0.00 (0.00 - 0.00)     | 0.000 | 0.000 | FALSE | TRUE | Did Not Converge |
| Dombrock | B | IL 15       | 0.85 (0.64 - 1.12)     | 0.238 | 0.238 | FALSE | TRUE | Converged        |
| Dombrock | B | IL 1A       | 0.79 (0.60 - 1.03)     | 0.084 | 0.084 | FALSE | TRUE | Converged        |

|          |   |             |                      |       |       |       |      |                  |
|----------|---|-------------|----------------------|-------|-------|-------|------|------------------|
| Dombrock | B | IL 1B       | 1.93 (0.22 - 17.17)  | 0.554 | 0.554 | FALSE | TRUE | Did Not Converge |
| Dombrock | B | IL 1RA      | 0.00 (0.00 - 0.00)   | 0.000 | 0.000 | FALSE | TRUE | Did Not Converge |
| Dombrock | B | IL 2        | 0.99 (0.78 - 1.27)   | 0.945 | 0.945 | FALSE | TRUE | Converged        |
| Dombrock | B | IL 29 IFNL1 | 0.82 (0.61 - 1.11)   | 0.200 | 0.200 | FALSE | TRUE | Converged        |
| Dombrock | B | IL 33       | 0.82 (0.69 - 0.97)   | 0.021 | 0.021 | FALSE | TRUE | Converged        |
| Dombrock | B | IL 4        | 0.99 (0.67 - 1.46)   | 0.956 | 0.956 | FALSE | TRUE | Did Not Converge |
| Dombrock | B | IL 5        | 719084.44 (309821.63 | 0.000 | 0.000 | FALSE | TRUE | Did Not Converge |
| Dombrock | B | IL 6        | 0.00 (0.00 - 0.00)   | 0.000 | 0.000 | FALSE | TRUE | Did Not Converge |
| Dombrock | B | IL 7        | 0.79 (0.47 - 1.33)   | 0.375 | 0.375 | FALSE | TRUE | Did Not Converge |
| Dombrock | B | MCP 3       | 0.00 (0.00 - 0.00)   | 0.000 | 0.000 | FALSE | TRUE | Did Not Converge |
| Dombrock | B | MIP 1A      | 1.10 (0.75 - 1.60)   | 0.629 | 0.629 | FALSE | TRUE | Converged        |
| Dombrock | B | PYY         | 684290437721.42 (965 | 0.000 | 0.000 | FALSE | TRUE | Did Not Converge |
| Dombrock | B | SCF         | 0.99 (0.85 - 1.15)   | 0.897 | 0.897 | FALSE | TRUE | Converged        |
| Dombrock | B | SIL 2RA     | 1.37 (0.89 - 2.10)   | 0.149 | 0.149 | FALSE | TRUE | Converged        |
| Dombrock | B | TNF B       | 0.86 (0.74 - 1.01)   | 0.060 | 0.060 | FALSE | TRUE | Converged        |
| Dombrock | B | TSLP        | 0.77 (0.64 - 0.94)   | 0.008 | 0.008 | FALSE | TRUE | Converged        |
| Dombrock | B | SCD40L      | 1.09 (0.85 - 1.39)   | 0.494 | 0.494 | FALSE | TRUE | Converged        |
| RhE      | E | FGF 2       | 1.00 (0.88 - 1.14)   | 0.980 | 0.980 | FALSE | TRUE | Converged        |
| RhE      | E | FLT3L       | 0.62 (0.35 - 1.10)   | 0.099 | 0.099 | FALSE | TRUE | Converged        |
| RhE      | E | FRACTALKINE | 278113999132587268   | 0.000 | 0.000 | FALSE | TRUE | Did Not Converge |
| RhE      | E | GLP 1       | 0.95 (0.69 - 1.29)   | 0.725 | 0.725 | FALSE | TRUE | Converged        |
| RhE      | E | GLUCAGON    | 0.75 (0.51 - 1.11)   | 0.150 | 0.150 | FALSE | TRUE | Converged        |
| RhE      | E | GM CSF      | 0.83 (0.62 - 1.13)   | 0.237 | 0.237 | FALSE | TRUE | Converged        |
| RhE      | E | IFNA2       | 0.00 (0.00 - 0.00)   | 0.000 | 0.000 | FALSE | TRUE | Did Not Converge |
| RhE      | E | IFNG        | 0.86 (0.71 - 1.05)   | 0.134 | 0.134 | FALSE | TRUE | Converged        |
| RhE      | E | IL 10       | 1.01 (0.78 - 1.32)   | 0.917 | 0.917 | FALSE | TRUE | Converged        |
| RhE      | E | IL 11       | 0.86 (0.68 - 1.07)   | 0.181 | 0.181 | FALSE | TRUE | Converged        |
| RhE      | E | IL 12P40    | 0.96 (0.72 - 1.28)   | 0.800 | 0.800 | FALSE | TRUE | Converged        |
| RhE      | E | IL 12P70    | --                   | 0.006 | 0.006 | FALSE | TRUE | Did Not Converge |
| RhE      | E | IL 15       | 0.82 (0.64 - 1.04)   | 0.106 | 0.106 | FALSE | TRUE | Converged        |
| RhE      | E | IL 1A       | 0.86 (0.68 - 1.08)   | 0.192 | 0.192 | FALSE | TRUE | Converged        |
| RhE      | E | IL 1B       | 4.59 (0.93 - 22.65)  | 0.061 | 0.061 | FALSE | TRUE | Did Not Converge |
| RhE      | E | IL 1RA      | 3454621362.44 (80574 | 0.000 | 0.000 | FALSE | TRUE | Did Not Converge |
| RhE      | E | IL 2        | 0.92 (0.75 - 1.14)   | 0.451 | 0.451 | FALSE | TRUE | Converged        |
| RhE      | E | IL 29 IFNL1 | 0.86 (0.66 - 1.12)   | 0.267 | 0.267 | FALSE | TRUE | Converged        |
| RhE      | E | IL 33       | 0.96 (0.83 - 1.11)   | 0.586 | 0.586 | FALSE | TRUE | Converged        |
| RhE      | E | IL 4        | 0.97 (0.70 - 1.33)   | 0.839 | 0.839 | FALSE | TRUE | Did Not Converge |
| RhE      | E | IL 5        | 4.37 (0.30 - 62.77)  | 0.278 | 0.278 | FALSE | TRUE | Did Not Converge |
| RhE      | E | IL 6        | 153942155564257428   | 0.000 | 0.000 | FALSE | TRUE | Did Not Converge |
| RhE      | E | IL 7        | 1.11 (0.66 - 1.85)   | 0.701 | 0.701 | FALSE | TRUE | Did Not Converge |
| RhE      | E | MCP 3       | 1.00 (0.92 - 1.09)   | 1.000 | 1.000 | FALSE | TRUE | Converged        |
| RhE      | E | MIP 1A      | 1.12 (0.81 - 1.53)   | 0.499 | 0.499 | FALSE | TRUE | Converged        |
| RhE      | E | PYY         | 1421533685383.22 (26 | 0.000 | 0.000 | FALSE | TRUE | Did Not Converge |
| RhE      | E | SCF         | 0.92 (0.80 - 1.05)   | 0.195 | 0.195 | FALSE | TRUE | Converged        |
| RhE      | E | SIL 2RA     | 1.40 (1.01 - 1.93)   | 0.043 | 0.043 | FALSE | TRUE | Converged        |
| RhE      | E | TNF B       | 0.94 (0.83 - 1.08)   | 0.396 | 0.396 | FALSE | TRUE | Converged        |
| RhE      | E | TSLP        | 0.86 (0.73 - 1.01)   | 0.061 | 0.061 | FALSE | TRUE | Converged        |
| RhE      | E | SCD40L      | 1.16 (0.94 - 1.44)   | 0.161 | 0.161 | FALSE | TRUE | Converged        |
| Aub      | B | FGF 2       | 0.87 (0.71 - 1.06)   | 0.168 | 0.168 | FALSE | TRUE | Converged        |
| Aub      | B | FLT3L       | 1.23 (0.66 - 2.28)   | 0.508 | 0.508 | FALSE | TRUE | Converged        |
| Aub      | B | FRACTALKINE | 0.00 (0.00 - 0.00)   | 0.000 | 0.000 | FALSE | TRUE | Did Not Converge |
| Aub      | B | GLP 1       | 1.01 (0.64 - 1.60)   | 0.962 | 0.962 | FALSE | TRUE | Converged        |
| Aub      | B | GLUCAGON    | 1.07 (0.59 - 1.95)   | 0.831 | 0.831 | FALSE | TRUE | Converged        |
| Aub      | B | GM CSF      | 1.29 (0.82 - 2.03)   | 0.272 | 0.272 | FALSE | TRUE | Converged        |
| Aub      | B | IFNA2       | 0.00 (0.00 - 0.00)   | 0.000 | 0.000 | FALSE | TRUE | Did Not Converge |
| Aub      | B | IFNG        | 1.26 (0.92 - 1.71)   | 0.145 | 0.145 | FALSE | TRUE | Converged        |
| Aub      | B | IL 10       | 0.76 (0.48 - 1.22)   | 0.259 | 0.259 | FALSE | TRUE | Converged        |
| Aub      | B | IL 11       | 0.78 (0.53 - 1.15)   | 0.211 | 0.211 | FALSE | TRUE | Converged        |
| Aub      | B | IL 12P40    | 1.00 (0.64 - 1.54)   | 0.985 | 0.985 | FALSE | TRUE | Converged        |
| Aub      | B | IL 12P70    | 0.21 (0.03 - 1.40)   | 0.106 | 0.106 | FALSE | TRUE | Did Not Converge |
| Aub      | B | IL 15       | 0.91 (0.62 - 1.32)   | 0.614 | 0.614 | FALSE | TRUE | Converged        |
| Aub      | B | IL 1A       | 0.93 (0.64 - 1.35)   | 0.697 | 0.697 | FALSE | TRUE | Converged        |
| Aub      | B | IL 1B       | 1.14 (0.08 - 16.76)  | 0.922 | 0.922 | FALSE | TRUE | Did Not Converge |
| Aub      | B | IL 1RA      | 0.00 (0.00 - 0.00)   | 0.000 | 0.000 | FALSE | TRUE | Did Not Converge |
| Aub      | B | IL 2        | 0.86 (0.61 - 1.23)   | 0.412 | 0.412 | FALSE | TRUE | Converged        |
| Aub      | B | IL 29 IFNL1 | 0.66 (0.39 - 1.11)   | 0.119 | 0.119 | FALSE | TRUE | Converged        |
| Aub      | B | IL 33       | 0.94 (0.75 - 1.19)   | 0.619 | 0.619 | FALSE | TRUE | Converged        |
| Aub      | B | IL 4        | 0.79 (0.43 - 1.44)   | 0.447 | 0.447 | FALSE | TRUE | Converged        |
| Aub      | B | IL 5        | 1161833.73 (338621.7 | 0.000 | 0.000 | FALSE | TRUE | Did Not Converge |



|          |   |             |                        |       |       |       |      |                  |
|----------|---|-------------|------------------------|-------|-------|-------|------|------------------|
| Aub      | B | IL 6        | --                     | 0.019 | 0.019 | FALSE | TRUE | Did Not Converge |
| Aub      | B | IL 7        | 0.73 (0.36 - 1.46)     | 0.370 | 0.370 | FALSE | TRUE | Did Not Converge |
| Aub      | B | MCP 3       | 2.93 (0.75 - 11.49)    | 0.122 | 0.122 | FALSE | TRUE | Did Not Converge |
| Aub      | B | MIP 1A      | 0.98 (0.57 - 1.69)     | 0.937 | 0.937 | FALSE | TRUE | Converged        |
| Aub      | B | PYY         | 28287410125.20 (7657   | 0.000 | 0.000 | FALSE | TRUE | Did Not Converge |
| Aub      | B | SCF         | 1.06 (0.86 - 1.30)     | 0.573 | 0.573 | FALSE | TRUE | Converged        |
| Aub      | B | SIL 2RA     | 1.01 (0.54 - 1.89)     | 0.971 | 0.971 | FALSE | TRUE | Converged        |
| Aub      | B | TNF B       | 0.87 (0.71 - 1.08)     | 0.204 | 0.204 | FALSE | TRUE | Converged        |
| Aub      | B | TSLP        | 0.97 (0.75 - 1.24)     | 0.781 | 0.781 | FALSE | TRUE | Converged        |
| Aub      | B | SCD40L      | 1.19 (0.85 - 1.67)     | 0.316 | 0.316 | FALSE | TRUE | Converged        |
| Lutheran | B | FGF 2       | 1.09 (0.89 - 1.34)     | 0.405 | 0.405 | FALSE | TRUE | Converged        |
| Lutheran | B | FLT3L       | 0.96 (0.45 - 2.07)     | 0.920 | 0.920 | FALSE | TRUE | Converged        |
| Lutheran | B | FRACTALKINE | --                     | 0.000 | 0.000 | FALSE | TRUE | Did Not Converge |
| Lutheran | B | GLP 1       | 0.84 (0.51 - 1.39)     | 0.492 | 0.492 | FALSE | TRUE | Converged        |
| Lutheran | B | GLUCAGON    | 0.37 (0.13 - 1.07)     | 0.066 | 0.066 | FALSE | TRUE | Converged        |
| Lutheran | B | GM CSF      | 1.40 (0.83 - 2.36)     | 0.202 | 0.202 | FALSE | TRUE | Converged        |
| Lutheran | B | IFNA2       | --                     | 0.000 | 0.000 | FALSE | TRUE | Did Not Converge |
| Lutheran | B | IFNG        | 1.10 (0.81 - 1.50)     | 0.545 | 0.545 | FALSE | TRUE | Converged        |
| Lutheran | B | IL 10       | 1.16 (0.81 - 1.66)     | 0.421 | 0.421 | FALSE | TRUE | Converged        |
| Lutheran | B | IL 11       | 0.98 (0.69 - 1.38)     | 0.892 | 0.892 | FALSE | TRUE | Converged        |
| Lutheran | B | IL 12P40    | 1.09 (0.70 - 1.70)     | 0.715 | 0.715 | FALSE | TRUE | Converged        |
| Lutheran | B | IL 12P70    | --                     | 0.000 | 0.000 | FALSE | TRUE | Did Not Converge |
| Lutheran | B | IL 15       | 1.11 (0.79 - 1.57)     | 0.541 | 0.541 | FALSE | TRUE | Converged        |
| Lutheran | B | IL 1A       | 1.25 (0.90 - 1.74)     | 0.183 | 0.183 | FALSE | TRUE | Converged        |
| Lutheran | B | IL 1B       | 326859.25 (127974.27   | 0.000 | 0.000 | FALSE | TRUE | Did Not Converge |
| Lutheran | B | IL 1RA      | 0.00 (0.00 - 0.00)     | 0.000 | 0.000 | FALSE | TRUE | Did Not Converge |
| Lutheran | B | IL 2        | 1.17 (0.86 - 1.59)     | 0.329 | 0.329 | FALSE | TRUE | Converged        |
| Lutheran | B | IL 29 IFNL1 | 1.30 (0.91 - 1.85)     | 0.153 | 0.153 | FALSE | TRUE | Converged        |
| Lutheran | B | IL 33       | 1.03 (0.82 - 1.29)     | 0.795 | 0.795 | FALSE | TRUE | Converged        |
| Lutheran | B | IL 4        | 0.82 (0.48 - 1.40)     | 0.461 | 0.461 | FALSE | TRUE | Converged        |
| Lutheran | B | IL 5        | 0.54 (0.05 - 5.42)     | 0.599 | 0.599 | FALSE | TRUE | Did Not Converge |
| Lutheran | B | IL 6        | 52694746.65 (0.02 - 16 | 0.111 | 0.111 | FALSE | TRUE | Did Not Converge |
| Lutheran | B | IL 7        | 1.26 (0.64 - 2.47)     | 0.504 | 0.504 | FALSE | TRUE | Did Not Converge |
| Lutheran | B | MCP 3       | --                     | 0.000 | 0.000 | FALSE | TRUE | Did Not Converge |
| Lutheran | B | MIP 1A      | 0.55 (0.27 - 1.10)     | 0.092 | 0.092 | FALSE | TRUE | Converged        |
| Lutheran | B | PYY         | 0.00 (0.00 - 0.00)     | 0.000 | 0.000 | FALSE | TRUE | Did Not Converge |
| Lutheran | B | SCF         | 0.92 (0.74 - 1.13)     | 0.409 | 0.409 | FALSE | TRUE | Converged        |
| Lutheran | B | SIL 2RA     | 1.52 (0.94 - 2.47)     | 0.087 | 0.087 | FALSE | TRUE | Converged        |
| Lutheran | B | TNF B       | 0.96 (0.77 - 1.18)     | 0.679 | 0.679 | FALSE | TRUE | Converged        |
| Lutheran | B | TSLP        | 1.09 (0.86 - 1.38)     | 0.497 | 0.497 | FALSE | TRUE | Converged        |
| Lutheran | B | SCD40L      | 1.00 (0.72 - 1.39)     | 0.989 | 0.989 | FALSE | TRUE | Converged        |
| Duffy    | B | FGF 2       | 0.96 (0.84 - 1.11)     | 0.593 | 0.593 | FALSE | TRUE | Converged        |
| Duffy    | B | FLT3L       | 0.83 (0.52 - 1.31)     | 0.418 | 0.418 | FALSE | TRUE | Converged        |
| Duffy    | B | FRACTALKINE | --                     | 0.000 | 0.000 | FALSE | TRUE | Did Not Converge |
| Duffy    | B | GLP 1       | 1.19 (0.86 - 1.64)     | 0.288 | 0.288 | FALSE | TRUE | Converged        |
| Duffy    | B | GLUCAGON    | 1.07 (0.70 - 1.63)     | 0.749 | 0.749 | FALSE | TRUE | Converged        |
| Duffy    | B | GM CSF      | 0.85 (0.61 - 1.18)     | 0.324 | 0.324 | FALSE | TRUE | Converged        |
| Duffy    | B | IFNA2       | 0.00 (0.00 - 0.00)     | 0.000 | 0.000 | FALSE | TRUE | Did Not Converge |
| Duffy    | B | IFNG        | 0.80 (0.64 - 0.98)     | 0.033 | 0.033 | FALSE | TRUE | Converged        |
| Duffy    | B | IL 10       | 1.17 (0.86 - 1.59)     | 0.306 | 0.306 | FALSE | TRUE | Converged        |
| Duffy    | B | IL 11       | 0.82 (0.65 - 1.04)     | 0.101 | 0.101 | FALSE | TRUE | Converged        |
| Duffy    | B | IL 12P40    | 1.08 (0.79 - 1.48)     | 0.636 | 0.636 | FALSE | TRUE | Converged        |
| Duffy    | B | IL 12P70    | 0.59 (0.07 - 5.13)     | 0.632 | 0.632 | FALSE | TRUE | Did Not Converge |
| Duffy    | B | IL 15       | 1.15 (0.89 - 1.48)     | 0.279 | 0.279 | FALSE | TRUE | Converged        |
| Duffy    | B | IL 1A       | 1.24 (0.95 - 1.60)     | 0.111 | 0.111 | FALSE | TRUE | Converged        |
| Duffy    | B | IL 1B       | 0.68 (0.20 - 2.38)     | 0.550 | 0.550 | FALSE | TRUE | Did Not Converge |
| Duffy    | B | IL 1RA      | 0.00 (0.00 - 0.00)     | 0.000 | 0.000 | FALSE | TRUE | Did Not Converge |
| Duffy    | B | IL 2        | 0.97 (0.77 - 1.21)     | 0.780 | 0.780 | FALSE | TRUE | Converged        |
| Duffy    | B | IL 29 IFNL1 | 0.96 (0.72 - 1.27)     | 0.756 | 0.756 | FALSE | TRUE | Converged        |
| Duffy    | B | IL 33       | 0.93 (0.79 - 1.08)     | 0.333 | 0.333 | FALSE | TRUE | Converged        |
| Duffy    | B | IL 4        | 0.92 (0.65 - 1.30)     | 0.638 | 0.638 | FALSE | TRUE | Converged        |
| Duffy    | B | IL 5        | 3.98 (1.00 - 15.83)    | 0.050 | 0.050 | FALSE | TRUE | Did Not Converge |
| Duffy    | B | IL 6        | --                     | 0.014 | 0.014 | FALSE | TRUE | Did Not Converge |
| Duffy    | B | IL 7        | 0.69 (0.40 - 1.17)     | 0.170 | 0.170 | FALSE | TRUE | Converged        |
| Duffy    | B | MCP 3       | --                     | 0.000 | 0.000 | FALSE | TRUE | Did Not Converge |
| Duffy    | B | MIP 1A      | 0.89 (0.63 - 1.25)     | 0.496 | 0.496 | FALSE | TRUE | Converged        |
| Duffy    | B | PYY         | --                     | 0.000 | 0.000 | FALSE | TRUE | Did Not Converge |
| Duffy    | B | SCF         | 0.99 (0.86 - 1.14)     | 0.878 | 0.878 | FALSE | TRUE | Converged        |
| Duffy    | B | SIL 2RA     | 0.76 (0.51 - 1.15)     | 0.197 | 0.197 | FALSE | TRUE | Converged        |

|       |    |              |                       |       |       |       |       |           |
|-------|----|--------------|-----------------------|-------|-------|-------|-------|-----------|
| Duffy | B  | TNF B        | 1.02 (0.88 - 1.18)    | 0.755 | 0.755 | FALSE | TRUE  | Converged |
| Duffy | B  | TSLP         | 0.88 (0.74 - 1.04)    | 0.145 | 0.145 | FALSE | TRUE  | Converged |
| Duffy | B  | SCD40L       | 0.95 (0.75 - 1.19)    | 0.630 | 0.630 | FALSE | TRUE  | Converged |
| ABO   | A1 | ADIPONECTIN  | 0.03 (-0.01 - 0.07)   | 0.205 | 0.006 | FALSE | FALSE | Converged |
| ABO   | A2 | ADIPONECTIN  | -0.06 (-0.20 - 0.07)  | 0.344 | 0.006 | FALSE | FALSE | Converged |
| ABO   | B  | ADIPONECTIN  | -0.01 (-0.12 - 0.10)  | 0.891 | 0.006 | FALSE | FALSE | Converged |
| ABO   | A1 | ADIPSIN      | -0.01 (-0.04 - 0.02)  | 0.439 | 0.786 | FALSE | FALSE | Converged |
| ABO   | A2 | ADIPSIN      | -0.03 (-0.10 - 0.04)  | 0.384 | 0.786 | FALSE | FALSE | Converged |
| ABO   | B  | ADIPSIN      | -0.03 (-0.07 - 0.01)  | 0.186 | 0.786 | FALSE | FALSE | Converged |
| ABO   | A1 | AMYLIN       | -0.03 (-0.11 - 0.04)  | 0.388 | 0.007 | FALSE | FALSE | Converged |
| ABO   | A2 | AMYLIN       | -0.06 (-0.22 - 0.11)  | 0.494 | 0.007 | FALSE | FALSE | Converged |
| ABO   | B  | AMYLIN       | 0.15 (0.02 - 0.28)    | 0.023 | 0.007 | FALSE | FALSE | Converged |
| ABO   | A1 | BCA 1        | -0.01 (-0.04 - 0.01)  | 0.328 | 0.205 | FALSE | FALSE | Converged |
| ABO   | A2 | BCA 1        | 0.03 (-0.03 - 0.09)   | 0.353 | 0.205 | FALSE | FALSE | Converged |
| ABO   | B  | BCA 1        | -0.04 (-0.10 - 0.03)  | 0.259 | 0.205 | FALSE | FALSE | Converged |
| ABO   | A1 | C PEPTIDE    | -0.01 (-0.10 - 0.08)  | 0.792 | 0.624 | FALSE | FALSE | Converged |
| ABO   | A2 | C PEPTIDE    | 0.02 (-0.09 - 0.14)   | 0.715 | 0.624 | FALSE | FALSE | Converged |
| ABO   | B  | C PEPTIDE    | 0.11 (-0.05 - 0.26)   | 0.172 | 0.624 | FALSE | FALSE | Converged |
| ABO   | A1 | CCL19 MIP3B  | 0.00 (-0.02 - 0.03)   | 0.735 | 0.129 | FALSE | FALSE | Converged |
| ABO   | A2 | CCL19 MIP3B  | 0.03 (-0.06 - 0.12)   | 0.508 | 0.129 | FALSE | FALSE | Converged |
| ABO   | B  | CCL19 MIP3B  | -0.03 (-0.09 - 0.03)  | 0.364 | 0.129 | FALSE | FALSE | Converged |
| ABO   | A1 | CCL20 MIP3A  | 0.01 (-0.04 - 0.07)   | 0.621 | 0.063 | FALSE | FALSE | Converged |
| ABO   | A2 | CCL20 MIP3A  | 0.02 (-0.14 - 0.18)   | 0.826 | 0.063 | FALSE | FALSE | Converged |
| ABO   | B  | CCL20 MIP3A  | -0.08 (-0.18 - 0.02)  | 0.126 | 0.063 | FALSE | FALSE | Converged |
| ABO   | A1 | CRP          | 0.05 (-0.01 - 0.10)   | 0.108 | 0.319 | FALSE | FALSE | Converged |
| ABO   | A2 | CRP          | 0.03 (-0.14 - 0.20)   | 0.697 | 0.319 | FALSE | FALSE | Converged |
| ABO   | B  | CRP          | -0.02 (-0.18 - 0.13)  | 0.763 | 0.319 | FALSE | FALSE | Converged |
| ABO   | A1 | CTACK        | -0.02 (-0.04 - -0.01) | 0.009 | 0.065 | FALSE | FALSE | Converged |
| ABO   | A2 | CTACK        | 0.01 (-0.03 - 0.05)   | 0.695 | 0.065 | FALSE | FALSE | Converged |
| ABO   | B  | CTACK        | -0.03 (-0.05 - -0.00) | 0.029 | 0.065 | FALSE | FALSE | Converged |
| ABO   | A1 | CXCL11   TAC | -0.02 (-0.05 - 0.01)  | 0.227 | 0.000 | FALSE | FALSE | Converged |
| ABO   | A2 | CXCL11   TAC | -0.04 (-0.12 - 0.04)  | 0.365 | 0.000 | FALSE | FALSE | Converged |
| ABO   | B  | CXCL11   TAC | -0.07 (-0.12 - -0.02) | 0.003 | 0.000 | FALSE | FALSE | Converged |
| ABO   | A1 | CXCL6 GCP2   | 0.01 (-0.01 - 0.03)   | 0.302 | 0.005 | FALSE | FALSE | Converged |
| ABO   | A2 | CXCL6 GCP2   | 0.03 (-0.03 - 0.08)   | 0.303 | 0.005 | FALSE | FALSE | Converged |
| ABO   | B  | CXCL6 GCP2   | -0.05 (-0.08 - -0.01) | 0.011 | 0.005 | FALSE | FALSE | Converged |
| ABO   | A1 | CXCL9 MIG    | -0.00 (-0.03 - 0.03)  | 0.905 | 0.168 | FALSE | FALSE | Converged |
| ABO   | A2 | CXCL9 MIG    | 0.03 (-0.07 - 0.12)   | 0.571 | 0.168 | FALSE | FALSE | Converged |
| ABO   | B  | CXCL9 MIG    | -0.02 (-0.08 - 0.04)  | 0.471 | 0.168 | FALSE | FALSE | Converged |
| ABO   | A1 | EGF          | 0.06 (0.00 - 0.11)    | 0.038 | 0.203 | FALSE | FALSE | Converged |
| ABO   | A2 | EGF          | -0.03 (-0.19 - 0.13)  | 0.698 | 0.203 | FALSE | FALSE | Converged |
| ABO   | B  | EGF          | 0.06 (-0.04 - 0.16)   | 0.246 | 0.203 | FALSE | FALSE | Converged |
| ABO   | A1 | ENA 78       | 0.03 (-0.00 - 0.05)   | 0.061 | 0.530 | FALSE | FALSE | Converged |
| ABO   | A2 | ENA 78       | 0.03 (-0.05 - 0.10)   | 0.463 | 0.530 | FALSE | FALSE | Converged |
| ABO   | B  | ENA 78       | 0.00 (-0.05 - 0.05)   | 0.915 | 0.530 | FALSE | FALSE | Converged |
| ABO   | A1 | EOTAXIN 2    | 0.03 (-0.01 - 0.06)   | 0.109 | 0.142 | FALSE | FALSE | Converged |
| ABO   | A2 | EOTAXIN 2    | -0.08 (-0.21 - 0.04)  | 0.205 | 0.142 | FALSE | FALSE | Converged |
| ABO   | B  | EOTAXIN 2    | -0.05 (-0.12 - 0.02)  | 0.189 | 0.142 | FALSE | FALSE | Converged |
| ABO   | A1 | EOTAXIN      | 0.01 (-0.02 - 0.04)   | 0.450 | 0.145 | FALSE | FALSE | Converged |
| ABO   | A2 | EOTAXIN      | -0.01 (-0.04 - 0.03)  | 0.663 | 0.145 | FALSE | FALSE | Converged |
| ABO   | B  | EOTAXIN      | -0.05 (-0.10 - -0.01) | 0.030 | 0.145 | FALSE | FALSE | Converged |
| ABO   | A1 | G CSF        | 0.03 (-0.02 - 0.07)   | 0.218 | 0.241 | FALSE | FALSE | Converged |
| ABO   | A2 | G CSF        | 0.04 (-0.08 - 0.16)   | 0.502 | 0.241 | FALSE | FALSE | Converged |
| ABO   | B  | G CSF        | -0.02 (-0.09 - 0.05)  | 0.565 | 0.241 | FALSE | FALSE | Converged |
| ABO   | A1 | GIP          | 0.08 (-0.02 - 0.18)   | 0.109 | 0.003 | FALSE | FALSE | Converged |
| ABO   | A2 | GIP          | -0.00 (-0.18 - 0.18)  | 0.981 | 0.003 | FALSE | FALSE | Converged |
| ABO   | B  | GIP          | 0.29 (0.06 - 0.52)    | 0.015 | 0.003 | FALSE | FALSE | Converged |
| ABO   | A1 | GRO          | 0.00 (-0.01 - 0.02)   | 0.777 | 0.661 | FALSE | FALSE | Converged |
| ABO   | A2 | GRO          | 0.01 (-0.05 - 0.07)   | 0.738 | 0.661 | FALSE | FALSE | Converged |
| ABO   | B  | GRO          | 0.00 (-0.03 - 0.04)   | 0.921 | 0.661 | FALSE | FALSE | Converged |
| ABO   | A1 | IL 13        | 0.61 (0.35 - 0.88)    | 0.000 | 0.000 | TRUE  | FALSE | Converged |
| ABO   | A2 | IL 13        | -0.35 (-0.64 - -0.06) | 0.017 | 0.000 | TRUE  | FALSE | Converged |
| ABO   | B  | IL 13        | 0.77 (0.54 - 1.00)    | 0.000 | 0.000 | TRUE  | FALSE | Converged |
| ABO   | A1 | IL 16        | 0.03 (-0.03 - 0.08)   | 0.368 | 0.335 | FALSE | FALSE | Converged |
| ABO   | A2 | IL 16        | 0.05 (-0.15 - 0.25)   | 0.603 | 0.335 | FALSE | FALSE | Converged |
| ABO   | B  | IL 16        | -0.07 (-0.15 - 0.01)  | 0.081 | 0.335 | FALSE | FALSE | Converged |
| ABO   | A1 | IL 17        | 0.00 (-0.11 - 0.12)   | 0.932 | 0.342 | FALSE | FALSE | Converged |
| ABO   | A2 | IL 17        | 0.12 (-0.26 - 0.51)   | 0.538 | 0.342 | FALSE | FALSE | Converged |
| ABO   | B  | IL 17        | -0.10 (-0.29 - 0.09)  | 0.289 | 0.342 | FALSE | FALSE | Converged |

|     |    |                  |                       |       |       |       |       |           |
|-----|----|------------------|-----------------------|-------|-------|-------|-------|-----------|
| ABO | A1 | IL 23            | 0.40 (-0.02 - 0.81)   | 0.060 | 0.010 | FALSE | FALSE | Converged |
| ABO | A2 | IL 23            | 0.15 (-0.17 - 0.46)   | 0.362 | 0.010 | FALSE | FALSE | Converged |
| ABO | B  | IL 23            | -0.25 (-0.45 - -0.04) | 0.021 | 0.010 | FALSE | FALSE | Converged |
| ABO | A1 | IL 8             | 0.00 (-0.04 - 0.04)   | 0.921 | 0.008 | FALSE | FALSE | Converged |
| ABO | A2 | IL 8             | 0.11 (-0.03 - 0.26)   | 0.129 | 0.008 | FALSE | FALSE | Converged |
| ABO | B  | IL 8             | -0.11 (-0.18 - -0.04) | 0.002 | 0.008 | FALSE | FALSE | Converged |
| ABO | A1 | INSULIN          | 0.04 (-0.07 - 0.14)   | 0.504 | 0.091 | FALSE | FALSE | Converged |
| ABO | A2 | INSULIN          | -0.03 (-0.19 - 0.14)  | 0.759 | 0.091 | FALSE | FALSE | Converged |
| ABO | B  | INSULIN          | 0.19 (0.01 - 0.36)    | 0.035 | 0.091 | FALSE | FALSE | Converged |
| ABO | A1 | IP 10            | -0.01 (-0.03 - 0.01)  | 0.431 | 0.044 | FALSE | FALSE | Converged |
| ABO | A2 | IP 10            | 0.05 (-0.01 - 0.11)   | 0.131 | 0.044 | FALSE | FALSE | Converged |
| ABO | B  | IP 10            | -0.05 (-0.10 - -0.00) | 0.038 | 0.044 | FALSE | FALSE | Converged |
| ABO | A1 | LEPTIN           | 0.01 (-0.08 - 0.11)   | 0.800 | 0.403 | FALSE | FALSE | Converged |
| ABO | A2 | LEPTIN           | 0.03 (-0.24 - 0.30)   | 0.816 | 0.403 | FALSE | FALSE | Converged |
| ABO | B  | LEPTIN           | 0.12 (-0.05 - 0.28)   | 0.172 | 0.403 | FALSE | FALSE | Converged |
| ABO | A1 | LIPOCALIN 2 NGAL | -0.11 (-0.22 - -0.00) | 0.045 | 0.081 | FALSE | FALSE | Converged |
| ABO | A2 | LIPOCALIN 2 NGAL | 0.11 (-0.03 - 0.25)   | 0.134 | 0.081 | FALSE | FALSE | Converged |
| ABO | B  | LIPOCALIN 2 NGAL | -0.36 (-0.75 - 0.02)  | 0.062 | 0.081 | FALSE | FALSE | Converged |
| ABO | A1 | MCP 1            | 0.01 (-0.00 - 0.03)   | 0.140 | 0.156 | FALSE | FALSE | Converged |
| ABO | A2 | MCP 1            | -0.01 (-0.04 - 0.02)  | 0.619 | 0.156 | FALSE | FALSE | Converged |
| ABO | B  | MCP 1            | -0.02 (-0.06 - 0.02)  | 0.234 | 0.156 | FALSE | FALSE | Converged |
| ABO | A1 | MCP 2            | 0.02 (-0.00 - 0.05)   | 0.102 | 0.033 | FALSE | FALSE | Converged |
| ABO | A2 | MCP 2            | -0.07 (-0.19 - 0.05)  | 0.224 | 0.033 | FALSE | FALSE | Converged |
| ABO | B  | MCP 2            | 0.00 (-0.07 - 0.08)   | 0.918 | 0.033 | FALSE | FALSE | Converged |
| ABO | A1 | MCP 4            | 0.01 (-0.03 - 0.05)   | 0.740 | 0.298 | FALSE | FALSE | Converged |
| ABO | A2 | MCP 4            | 0.03 (-0.06 - 0.12)   | 0.495 | 0.298 | FALSE | FALSE | Converged |
| ABO | B  | MCP 4            | -0.03 (-0.12 - 0.05)  | 0.443 | 0.298 | FALSE | FALSE | Converged |
| ABO | A1 | MDC              | 0.00 (-0.01 - 0.02)   | 0.602 | 0.340 | FALSE | FALSE | Converged |
| ABO | A2 | MDC              | 0.03 (-0.00 - 0.07)   | 0.076 | 0.340 | FALSE | FALSE | Converged |
| ABO | B  | MDC              | -0.03 (-0.07 - 0.01)  | 0.205 | 0.340 | FALSE | FALSE | Converged |
| ABO | A1 | MIP 1B           | 0.01 (-0.02 - 0.05)   | 0.491 | 0.824 | FALSE | FALSE | Converged |
| ABO | A2 | MIP 1B           | 0.05 (-0.02 - 0.11)   | 0.137 | 0.824 | FALSE | FALSE | Converged |
| ABO | B  | MIP 1B           | 0.00 (-0.05 - 0.05)   | 0.962 | 0.824 | FALSE | FALSE | Converged |
| ABO | A1 | MIP 1D           | -0.02 (-0.06 - 0.02)  | 0.328 | 0.135 | FALSE | FALSE | Converged |
| ABO | A2 | MIP 1D           | -0.01 (-0.11 - 0.08)  | 0.765 | 0.135 | FALSE | FALSE | Converged |
| ABO | B  | MIP 1D           | -0.01 (-0.05 - 0.04)  | 0.763 | 0.135 | FALSE | FALSE | Converged |
| ABO | A1 | PAI 1            | -0.01 (-0.04 - 0.03)  | 0.683 | 0.010 | FALSE | FALSE | Converged |
| ABO | A2 | PAI 1            | -0.08 (-0.12 - -0.03) | 0.000 | 0.010 | FALSE | FALSE | Converged |
| ABO | B  | PAI 1            | -0.04 (-0.09 - 0.02)  | 0.164 | 0.010 | FALSE | FALSE | Converged |
| ABO | A1 | PP               | 0.09 (0.00 - 0.17)    | 0.045 | 0.106 | FALSE | FALSE | Converged |
| ABO | A2 | PP               | 0.14 (-0.02 - 0.29)   | 0.078 | 0.106 | FALSE | FALSE | Converged |
| ABO | B  | PP               | 0.15 (-0.00 - 0.30)   | 0.053 | 0.106 | FALSE | FALSE | Converged |
| ABO | A1 | RESISTIN         | -0.04 (-0.09 - -0.00) | 0.047 | 0.103 | FALSE | FALSE | Converged |
| ABO | A2 | RESISTIN         | 0.06 (-0.02 - 0.13)   | 0.146 | 0.103 | FALSE | FALSE | Converged |
| ABO | B  | RESISTIN         | -0.18 (-0.40 - 0.03)  | 0.089 | 0.103 | FALSE | FALSE | Converged |
| ABO | A1 | SAA              | 0.09 (0.02 - 0.16)    | 0.014 | 0.168 | FALSE | FALSE | Converged |
| ABO | A2 | SAA              | 0.02 (-0.16 - 0.21)   | 0.810 | 0.168 | FALSE | FALSE | Converged |
| ABO | B  | SAA              | -0.04 (-0.15 - 0.07)  | 0.507 | 0.168 | FALSE | FALSE | Converged |
| ABO | A1 | SAP              | 0.01 (-0.01 - 0.03)   | 0.428 | 0.795 | FALSE | FALSE | Converged |
| ABO | A2 | SAP              | -0.01 (-0.06 - 0.04)  | 0.614 | 0.795 | FALSE | FALSE | Converged |
| ABO | B  | SAP              | -0.02 (-0.09 - 0.05)  | 0.554 | 0.795 | FALSE | FALSE | Converged |
| ABO | A1 | SDF 1A B         | -0.02 (-0.04 - 0.00)  | 0.086 | 0.060 | FALSE | FALSE | Converged |
| ABO | A2 | SDF 1A B         | 0.01 (-0.05 - 0.07)   | 0.718 | 0.060 | FALSE | FALSE | Converged |
| ABO | B  | SDF 1A B         | 0.04 (0.01 - 0.07)    | 0.018 | 0.060 | FALSE | FALSE | Converged |
| ABO | A1 | SEGFR            | 0.01 (0.00 - 0.03)    | 0.044 | 0.080 | FALSE | FALSE | Converged |
| ABO | A2 | SEGFR            | -0.01 (-0.04 - 0.02)  | 0.573 | 0.080 | FALSE | FALSE | Converged |
| ABO | B  | SEGFR            | 0.02 (-0.00 - 0.04)   | 0.064 | 0.080 | FALSE | FALSE | Converged |
| ABO | A1 | SGP130           | -0.02 (-0.04 - -0.01) | 0.007 | 0.000 | TRUE  | FALSE | Converged |
| ABO | A2 | SGP130           | -0.01 (-0.04 - 0.02)  | 0.587 | 0.000 | TRUE  | FALSE | Converged |
| ABO | B  | SGP130           | 0.02 (-0.00 - 0.04)   | 0.104 | 0.000 | TRUE  | FALSE | Converged |
| ABO | A1 | SIL4R            | 0.01 (-0.02 - 0.03)   | 0.621 | 0.302 | FALSE | FALSE | Converged |
| ABO | A2 | SIL4R            | 0.06 (0.00 - 0.13)    | 0.041 | 0.302 | FALSE | FALSE | Converged |
| ABO | B  | SIL4R            | -0.02 (-0.07 - 0.02)  | 0.315 | 0.302 | FALSE | FALSE | Converged |
| ABO | A1 | SIL6R            | 0.01 (-0.01 - 0.03)   | 0.285 | 0.569 | FALSE | FALSE | Converged |
| ABO | A2 | SIL6R            | 0.02 (-0.02 - 0.06)   | 0.409 | 0.569 | FALSE | FALSE | Converged |
| ABO | B  | SIL6R            | 0.02 (-0.01 - 0.06)   | 0.186 | 0.569 | FALSE | FALSE | Converged |
| ABO | A1 | SILRII           | 0.01 (-0.01 - 0.03)   | 0.208 | 0.085 | FALSE | FALSE | Converged |
| ABO | A2 | SILRII           | 0.01 (-0.04 - 0.05)   | 0.750 | 0.085 | FALSE | FALSE | Converged |
| ABO | B  | SILRII           | 0.04 (0.01 - 0.08)    | 0.020 | 0.085 | FALSE | FALSE | Converged |

|     |    |             |                       |       |       |       |       |                  |
|-----|----|-------------|-----------------------|-------|-------|-------|-------|------------------|
| ABO | A1 | STNFRI      | 0.00 (-0.01 - 0.02)   | 0.630 | 0.396 | FALSE | FALSE | Converged        |
| ABO | A2 | STNFRI      | -0.01 (-0.04 - 0.02)  | 0.564 | 0.396 | FALSE | FALSE | Converged        |
| ABO | B  | STNFRI      | 0.02 (-0.01 - 0.05)   | 0.155 | 0.396 | FALSE | FALSE | Converged        |
| ABO | A1 | STNFRII     | 0.00 (-0.02 - 0.02)   | 0.888 | 0.903 | FALSE | FALSE | Converged        |
| ABO | A2 | STNFRII     | -0.00 (-0.04 - 0.03)  | 0.806 | 0.903 | FALSE | FALSE | Converged        |
| ABO | B  | STNFRII     | 0.00 (-0.02 - 0.03)   | 0.745 | 0.903 | FALSE | FALSE | Converged        |
| ABO | A1 | SVEGFR2     | -0.03 (-0.05 - -0.01) | 0.000 | 0.000 | TRUE  | FALSE | Converged        |
| ABO | A2 | SVEGFR2     | -0.02 (-0.06 - 0.01)  | 0.181 | 0.000 | TRUE  | FALSE | Converged        |
| ABO | B  | SVEGFR2     | 0.02 (-0.01 - 0.04)   | 0.178 | 0.000 | TRUE  | FALSE | Converged        |
| ABO | A1 | SVEGFR3     | -0.09 (-0.14 - -0.05) | 0.000 | 0.000 | TRUE  | FALSE | Converged        |
| ABO | A2 | SVEGFR3     | 0.04 (-0.06 - 0.14)   | 0.470 | 0.000 | TRUE  | FALSE | Converged        |
| ABO | B  | SVEGFR3     | 0.09 (-0.00 - 0.17)   | 0.052 | 0.000 | TRUE  | FALSE | Converged        |
| ABO | A1 | TARC        | 0.02 (-0.01 - 0.05)   | 0.299 | 0.729 | FALSE | FALSE | Converged        |
| ABO | A2 | TARC        | -0.00 (-0.08 - 0.08)  | 0.990 | 0.729 | FALSE | FALSE | Converged        |
| ABO | B  | TARC        | -0.00 (-0.06 - 0.06)  | 0.949 | 0.729 | FALSE | FALSE | Converged        |
| ABO | A1 | TGF A       | 0.05 (-0.01 - 0.10)   | 0.105 | 0.029 | FALSE | FALSE | Converged        |
| ABO | A2 | TGF A       | 0.10 (-0.02 - 0.21)   | 0.110 | 0.029 | FALSE | FALSE | Converged        |
| ABO | B  | TGF A       | -0.09 (-0.19 - 0.01)  | 0.088 | 0.029 | FALSE | FALSE | Converged        |
| ABO | A1 | TGF B1      | 0.02 (-0.04 - 0.07)   | 0.528 | 0.545 | FALSE | FALSE | Converged        |
| ABO | A2 | TGF B1      | 0.05 (-0.06 - 0.17)   | 0.366 | 0.545 | FALSE | FALSE | Converged        |
| ABO | B  | TGF B1      | 0.03 (-0.02 - 0.08)   | 0.262 | 0.545 | FALSE | FALSE | Converged        |
| ABO | A1 | TNFA        | -0.01 (-0.03 - 0.02)  | 0.697 | 0.201 | FALSE | FALSE | Converged        |
| ABO | A2 | TNFA        | 0.02 (-0.03 - 0.06)   | 0.430 | 0.201 | FALSE | FALSE | Converged        |
| ABO | B  | TNFA        | -0.03 (-0.07 - -0.00) | 0.034 | 0.201 | FALSE | FALSE | Converged        |
| ABO | A1 | TPO         | 0.06 (-0.03 - 0.14)   | 0.186 | 0.269 | FALSE | FALSE | Converged        |
| ABO | A2 | TPO         | 0.03 (-0.24 - 0.30)   | 0.825 | 0.269 | FALSE | FALSE | Converged        |
| ABO | B  | TPO         | -0.12 (-0.26 - 0.01)  | 0.072 | 0.269 | FALSE | FALSE | Converged        |
| ABO | A1 | TRAIL       | -0.01 (-0.04 - 0.02)  | 0.557 | 0.491 | FALSE | FALSE | Converged        |
| ABO | A2 | TRAIL       | -0.11 (-0.27 - 0.05)  | 0.163 | 0.491 | FALSE | FALSE | Converged        |
| ABO | B  | TRAIL       | -0.01 (-0.05 - 0.03)  | 0.520 | 0.491 | FALSE | FALSE | Converged        |
| ABO | A1 | VEGF        | 0.07 (-0.01 - 0.14)   | 0.082 | 0.638 | FALSE | FALSE | Converged        |
| ABO | A2 | VEGF        | 0.03 (-0.21 - 0.26)   | 0.823 | 0.638 | FALSE | FALSE | Converged        |
| ABO | B  | VEGF        | 0.02 (-0.14 - 0.17)   | 0.836 | 0.638 | FALSE | FALSE | Converged        |
| ABO | A1 | X6CKINE     | 0.01 (-0.04 - 0.05)   | 0.786 | 0.235 | FALSE | FALSE | Converged        |
| ABO | A2 | X6CKINE     | 0.01 (-0.11 - 0.14)   | 0.807 | 0.235 | FALSE | FALSE | Converged        |
| ABO | B  | X6CKINE     | 0.06 (-0.03 - 0.15)   | 0.197 | 0.235 | FALSE | FALSE | Converged        |
| ABO | A1 | FGF 2       | 1.07 (0.82 - 1.39)    | 0.615 | 0.085 | FALSE | TRUE  | Converged        |
| ABO | A2 | FGF 2       | 1.46 (0.72 - 2.97)    | 0.294 | 0.085 | FALSE | TRUE  | Converged        |
| ABO | B  | FGF 2       | 1.01 (0.59 - 1.73)    | 0.980 | 0.085 | FALSE | TRUE  | Converged        |
| ABO | A1 | FLT3L       | 1.15 (0.51 - 2.61)    | 0.734 | 0.000 | FALSE | TRUE  | Did Not Converge |
| ABO | A2 | FLT3L       | 0.00 (0.00 - 0.00)    | 0.000 | 0.000 | FALSE | TRUE  | Did Not Converge |
| ABO | B  | FLT3L       | 1.12 (0.19 - 6.54)    | 0.901 | 0.000 | FALSE | TRUE  | Did Not Converge |
| ABO | A1 | FRACTALKINE | 399834191794466795    | 0.000 | 0.000 | FALSE | TRUE  | Did Not Converge |
| ABO | A2 | FRACTALKINE | 0.00 (0.00 - 0.00)    | 0.000 | 0.000 | FALSE | TRUE  | Did Not Converge |
| ABO | B  | FRACTALKINE | 0.00 (0.00 - 0.00)    | 0.000 | 0.000 | FALSE | TRUE  | Did Not Converge |
| ABO | A1 | GLP 1       | 0.77 (0.41 - 1.45)    | 0.421 | --    | FALSE | TRUE  | Converged        |
| ABO | A2 | GLP 1       | 0.00 (0.00 - 0.00)    | 0.000 | --    | FALSE | TRUE  | Converged        |
| ABO | B  | GLP 1       | 2.05 (0.82 - 5.10)    | 0.123 | --    | FALSE | TRUE  | Converged        |
| ABO | A1 | GLUCAGON    | 0.47 (0.20 - 1.09)    | 0.079 | 0.054 | FALSE | TRUE  | Converged        |
| ABO | A2 | GLUCAGON    | 0.64 (0.13 - 3.18)    | 0.586 | 0.054 | FALSE | TRUE  | Converged        |
| ABO | B  | GLUCAGON    | 0.98 (0.44 - 2.22)    | 0.967 | 0.054 | FALSE | TRUE  | Converged        |
| ABO | A1 | GM CSF      | 1.43 (0.84 - 2.42)    | 0.183 | 0.393 | FALSE | TRUE  | Converged        |
| ABO | A2 | GM CSF      | 1.54 (0.37 - 6.51)    | 0.554 | 0.393 | FALSE | TRUE  | Converged        |
| ABO | B  | GM CSF      | 0.77 (0.26 - 2.25)    | 0.632 | 0.393 | FALSE | TRUE  | Converged        |
| ABO | A1 | IFNA2       | 0.00 (0.00 - 0.00)    | 0.000 | 0.000 | FALSE | TRUE  | Did Not Converge |
| ABO | A2 | IFNA2       | 0.00 (0.00 - 0.00)    | 0.000 | 0.000 | FALSE | TRUE  | Did Not Converge |
| ABO | B  | IFNA2       | 0.00 (0.00 - 0.00)    | 0.000 | 0.000 | FALSE | TRUE  | Did Not Converge |
| ABO | A1 | IFNG        | 1.10 (0.75 - 1.61)    | 0.635 | 0.013 | FALSE | TRUE  | Converged        |
| ABO | A2 | IFNG        | 5.01 (1.18 - 21.25)   | 0.029 | 0.013 | FALSE | TRUE  | Converged        |
| ABO | B  | IFNG        | 1.01 (0.47 - 2.18)    | 0.970 | 0.013 | FALSE | TRUE  | Converged        |
| ABO | A1 | IL 10       | 0.65 (0.35 - 1.21)    | 0.176 | 0.570 | FALSE | TRUE  | Converged        |
| ABO | A2 | IL 10       | 1.58 (0.46 - 5.38)    | 0.467 | 0.570 | FALSE | TRUE  | Converged        |
| ABO | B  | IL 10       | 1.88 (0.53 - 6.63)    | 0.326 | 0.570 | FALSE | TRUE  | Converged        |
| ABO | A1 | IL 11       | 0.85 (0.54 - 1.35)    | 0.495 | 0.640 | FALSE | TRUE  | Converged        |
| ABO | A2 | IL 11       | 1.44 (0.53 - 3.97)    | 0.476 | 0.640 | FALSE | TRUE  | Converged        |
| ABO | B  | IL 11       | 1.05 (0.45 - 2.42)    | 0.918 | 0.640 | FALSE | TRUE  | Converged        |
| ABO | A1 | IL 12P40    | 1.93 (1.18 - 3.13)    | 0.008 | 0.000 | FALSE | TRUE  | Did Not Converge |
| ABO | A2 | IL 12P40    | 1.01 (0.31 - 3.34)    | 0.983 | 0.000 | FALSE | TRUE  | Did Not Converge |
| ABO | B  | IL 12P40    | 0.00 (0.00 - 0.00)    | 0.000 | 0.000 | FALSE | TRUE  | Did Not Converge |

|     |    |             |                        |       |       |       |      |                  |
|-----|----|-------------|------------------------|-------|-------|-------|------|------------------|
| ABO | A1 | IL 12P70    | --                     | 0.000 | 0.000 | FALSE | TRUE | Did Not Converge |
| ABO | A2 | IL 12P70    | --                     | 0.000 | 0.000 | FALSE | TRUE | Did Not Converge |
| ABO | B  | IL 12P70    | 0.00 (0.00 - 0.00)     | 0.000 | 0.000 | FALSE | TRUE | Did Not Converge |
| ABO | A1 | IL 15       | 1.19 (0.78 - 1.80)     | 0.416 | 0.645 | FALSE | TRUE | Converged        |
| ABO | A2 | IL 15       | 0.56 (0.12 - 2.59)     | 0.459 | 0.645 | FALSE | TRUE | Converged        |
| ABO | B  | IL 15       | 0.43 (0.10 - 1.90)     | 0.266 | 0.645 | FALSE | TRUE | Converged        |
| ABO | A1 | IL 1A       | 0.79 (0.48 - 1.30)     | 0.352 | 0.315 | FALSE | TRUE | Converged        |
| ABO | A2 | IL 1A       | 2.08 (0.79 - 5.53)     | 0.140 | 0.315 | FALSE | TRUE | Converged        |
| ABO | B  | IL 1A       | 0.46 (0.11 - 1.85)     | 0.272 | 0.315 | FALSE | TRUE | Converged        |
| ABO | A1 | IL 1B       | 0.93 (0.10 - 8.46)     | 0.946 | 0.000 | FALSE | TRUE | Did Not Converge |
| ABO | A2 | IL 1B       | 1201399.62 (142896.8   | 0.000 | 0.000 | FALSE | TRUE | Did Not Converge |
| ABO | B  | IL 1B       | 323861.85 (57575.38 -  | 0.000 | 0.000 | FALSE | TRUE | Did Not Converge |
| ABO | A1 | IL 1RA      | 47262.17 (7417.53 - 30 | 0.000 | 0.000 | FALSE | TRUE | Did Not Converge |
| ABO | A2 | IL 1RA      | 0.00 (0.00 - 0.00)     | 0.000 | 0.000 | FALSE | TRUE | Did Not Converge |
| ABO | B  | IL 1RA      | 14.30 (0.83 - 247.85)  | 0.068 | 0.000 | FALSE | TRUE | Did Not Converge |
| ABO | A1 | IL 2        | 0.98 (0.66 - 1.47)     | 0.928 | 0.592 | FALSE | TRUE | Converged        |
| ABO | A2 | IL 2        | 0.75 (0.23 - 2.42)     | 0.628 | 0.592 | FALSE | TRUE | Converged        |
| ABO | B  | IL 2        | 0.32 (0.07 - 1.42)     | 0.134 | 0.592 | FALSE | TRUE | Converged        |
| ABO | A1 | IL 29 IFNL1 | 1.34 (0.84 - 2.14)     | 0.216 | 0.000 | FALSE | TRUE | Did Not Converge |
| ABO | A2 | IL 29 IFNL1 | 0.00 (0.00 - 0.00)     | 0.000 | 0.000 | FALSE | TRUE | Did Not Converge |
| ABO | B  | IL 29 IFNL1 | 1.09 (0.33 - 3.62)     | 0.893 | 0.000 | FALSE | TRUE | Did Not Converge |
| ABO | A1 | IL 33       | 1.27 (0.95 - 1.68)     | 0.101 | 0.219 | FALSE | TRUE | Converged        |
| ABO | A2 | IL 33       | 1.97 (0.93 - 4.16)     | 0.077 | 0.219 | FALSE | TRUE | Converged        |
| ABO | B  | IL 33       | 0.84 (0.44 - 1.59)     | 0.589 | 0.219 | FALSE | TRUE | Converged        |
| ABO | A1 | IL 4        | 0.82 (0.37 - 1.82)     | 0.628 | 0.963 | FALSE | TRUE | Did Not Converge |
| ABO | A2 | IL 4        | 1.57 (0.22 - 11.39)    | 0.657 | 0.963 | FALSE | TRUE | Did Not Converge |
| ABO | B  | IL 4        | 0.92 (0.19 - 4.41)     | 0.920 | 0.963 | FALSE | TRUE | Did Not Converge |
| ABO | A1 | IL 5        | 0.77 (0.14 - 4.34)     | 0.766 | 0.000 | FALSE | TRUE | Did Not Converge |
| ABO | A2 | IL 5        | 1286259.96 (121839.9   | 0.000 | 0.000 | FALSE | TRUE | Did Not Converge |
| ABO | B  | IL 5        | 550898.68 (76294.97 -  | 0.000 | 0.000 | FALSE | TRUE | Did Not Converge |
| ABO | A1 | IL 6        | --                     | 0.000 | 0.000 | FALSE | TRUE | Did Not Converge |
| ABO | A2 | IL 6        | --                     | 0.000 | 0.000 | FALSE | TRUE | Did Not Converge |
| ABO | B  | IL 6        | --                     | 0.000 | 0.000 | FALSE | TRUE | Did Not Converge |
| ABO | A1 | IL 7        | 1.24 (0.44 - 3.50)     | 0.687 | 0.000 | FALSE | TRUE | Did Not Converge |
| ABO | A2 | IL 7        | 1062156.92 (362944.4   | 0.000 | 0.000 | FALSE | TRUE | Did Not Converge |
| ABO | B  | IL 7        | 0.73 (0.23 - 2.39)     | 0.608 | 0.000 | FALSE | TRUE | Did Not Converge |
| ABO | A1 | MCP 3       | 0.00 (0.00 - 0.00)     | 0.000 | 0.000 | FALSE | TRUE | Did Not Converge |
| ABO | A2 | MCP 3       | 0.00 (0.00 - 0.00)     | 0.000 | 0.000 | FALSE | TRUE | Did Not Converge |
| ABO | B  | MCP 3       | 0.00 (0.00 - 0.00)     | 0.000 | 0.000 | FALSE | TRUE | Did Not Converge |
| ABO | A1 | MIP 1A      | 0.82 (0.46 - 1.46)     | 0.505 | 0.203 | FALSE | TRUE | Converged        |
| ABO | A2 | MIP 1A      | 0.56 (0.12 - 2.64)     | 0.468 | 0.203 | FALSE | TRUE | Converged        |
| ABO | B  | MIP 1A      | 0.35 (0.08 - 1.57)     | 0.170 | 0.203 | FALSE | TRUE | Converged        |
| ABO | A1 | PYY         | 0.00 (0.00 - 0.00)     | 0.000 | 0.000 | FALSE | TRUE | Did Not Converge |
| ABO | A2 | PYY         | 0.00 (0.00 - 0.00)     | 0.000 | 0.000 | FALSE | TRUE | Did Not Converge |
| ABO | B  | PYY         | 3.23 (0.53 - 19.64)    | 0.204 | 0.000 | FALSE | TRUE | Did Not Converge |
| ABO | A1 | SCF         | 1.00 (0.77 - 1.31)     | 0.981 | 0.496 | FALSE | TRUE | Converged        |
| ABO | A2 | SCF         | 0.62 (0.28 - 1.38)     | 0.236 | 0.496 | FALSE | TRUE | Converged        |
| ABO | B  | SCF         | 1.08 (0.63 - 1.86)     | 0.779 | 0.496 | FALSE | TRUE | Converged        |
| ABO | A1 | SIL 2RA     | 0.34 (0.08 - 1.36)     | 0.127 | --    | FALSE | TRUE | Converged        |
| ABO | A2 | SIL 2RA     | 1.64 (0.35 - 7.61)     | 0.527 | --    | FALSE | TRUE | Converged        |
| ABO | B  | SIL 2RA     | 0.00 (0.00 - 0.00)     | 0.000 | --    | FALSE | TRUE | Converged        |
| ABO | A1 | TNF B       | 1.12 (0.87 - 1.45)     | 0.367 | 0.677 | FALSE | TRUE | Converged        |
| ABO | A2 | TNF B       | 1.15 (0.56 - 2.36)     | 0.708 | 0.677 | FALSE | TRUE | Converged        |
| ABO | B  | TNF B       | 0.54 (0.27 - 1.10)     | 0.090 | 0.677 | FALSE | TRUE | Converged        |
| ABO | A1 | TSLP        | 1.03 (0.75 - 1.41)     | 0.865 | 0.049 | FALSE | TRUE | Converged        |
| ABO | A2 | TSLP        | 1.29 (0.55 - 3.05)     | 0.560 | 0.049 | FALSE | TRUE | Converged        |
| ABO | B  | TSLP        | 0.81 (0.39 - 1.66)     | 0.559 | 0.049 | FALSE | TRUE | Converged        |
| ABO | A1 | SCD40L      | 1.94 (1.17 - 3.23)     | 0.011 | 0.232 | FALSE | TRUE | Converged        |
| ABO | A2 | SCD40L      | 1.10 (0.38 - 3.17)     | 0.867 | 0.232 | FALSE | TRUE | Converged        |
| ABO | B  | SCD40L      | 1.27 (0.54 - 3.00)     | 0.587 | 0.232 | FALSE | TRUE | Converged        |

Supplementary Table 4

| Blood Group | Antigen Phenotype | Marker           | Estimate (95% CI)     | P-value | Wald Joint P-value | Bonferroni Significant? |
|-------------|-------------------|------------------|-----------------------|---------|--------------------|-------------------------|
| Secretor    | Nonsecretor       | ADIPONECTIN      | -0.00 (-0.04 - 0.04)  | 0.997   | 0.997              | FALSE                   |
| Secretor    | Nonsecretor       | ADIPSIN          | 0.03 (0.00 - 0.05)    | 0.030   | 0.030              | FALSE                   |
| Secretor    | Nonsecretor       | AMYLIN           | 0.03 (-0.06 - 0.13)   | 0.519   | 0.520              | FALSE                   |
| Secretor    | Nonsecretor       | BCA 1            | 0.01 (-0.02 - 0.03)   | 0.588   | 0.588              | FALSE                   |
| Secretor    | Nonsecretor       | C PEPTIDE        | 0.01 (-0.03 - 0.06)   | 0.587   | 0.587              | FALSE                   |
| Secretor    | Nonsecretor       | CCL19 MIP3B      | 0.02 (-0.01 - 0.04)   | 0.146   | 0.146              | FALSE                   |
| Secretor    | Nonsecretor       | CCL20 MIP3A      | -0.00 (-0.04 - 0.04)  | 0.907   | 0.907              | FALSE                   |
| Secretor    | Nonsecretor       | CRP              | 0.03 (-0.01 - 0.08)   | 0.144   | 0.144              | FALSE                   |
| Secretor    | Nonsecretor       | CTACK            | 0.02 (0.01 - 0.03)    | 0.001   | 0.001              | FALSE                   |
| Secretor    | Nonsecretor       | CXCL11 I TAC     | -0.01 (-0.04 - 0.01)  | 0.349   | 0.349              | FALSE                   |
| Secretor    | Nonsecretor       | CXCL6 GCP2       | -0.01 (-0.03 - 0.01)  | 0.191   | 0.191              | FALSE                   |
| Secretor    | Nonsecretor       | CXCL9 MIG        | 0.02 (-0.00 - 0.04)   | 0.051   | 0.051              | FALSE                   |
| Secretor    | Nonsecretor       | EGF              | -0.01 (-0.05 - 0.03)  | 0.555   | 0.555              | FALSE                   |
| Secretor    | Nonsecretor       | ENA 78           | -0.01 (-0.04 - 0.01)  | 0.214   | 0.214              | FALSE                   |
| Secretor    | Nonsecretor       | EOTAXIN 2        | 0.00 (-0.03 - 0.03)   | 0.863   | 0.863              | FALSE                   |
| Secretor    | Nonsecretor       | EOTAXIN          | -0.00 (-0.02 - 0.02)  | 0.922   | 0.922              | FALSE                   |
| Secretor    | Nonsecretor       | G CSF            | -0.03 (-0.06 - 0.01)  | 0.119   | 0.119              | FALSE                   |
| Secretor    | Nonsecretor       | GIP              | -0.04 (-0.12 - 0.03)  | 0.246   | 0.247              | FALSE                   |
| Secretor    | Nonsecretor       | GRO              | 0.00 (-0.02 - 0.02)   | 0.996   | 0.996              | FALSE                   |
| Secretor    | Nonsecretor       | IL 13            | 0.61 (-0.13 - 1.34)   | 0.104   | 0.155              | FALSE                   |
| Secretor    | Nonsecretor       | IL 16            | -0.03 (-0.08 - 0.02)  | 0.294   | 0.294              | FALSE                   |
| Secretor    | Nonsecretor       | IL 17            | 0.04 (-0.12 - 0.19)   | 0.622   | 0.622              | FALSE                   |
| Secretor    | Nonsecretor       | IL 23            | -0.16 (-0.70 - 0.37)  | 0.553   | 0.561              | FALSE                   |
| Secretor    | Nonsecretor       | IL 8             | -0.00 (-0.04 - 0.03)  | 0.801   | 0.801              | FALSE                   |
| Secretor    | Nonsecretor       | INSULIN          | 0.02 (-0.06 - 0.09)   | 0.662   | 0.663              | FALSE                   |
| Secretor    | Nonsecretor       | IP 10            | -0.00 (-0.02 - 0.01)  | 0.649   | 0.649              | FALSE                   |
| Secretor    | Nonsecretor       | LEPTIN           | 0.02 (-0.05 - 0.08)   | 0.631   | 0.631              | FALSE                   |
| Secretor    | Nonsecretor       | LIPOCALIN 2 NGAL | 0.05 (0.00 - 0.09)    | 0.037   | 0.038              | FALSE                   |
| Secretor    | Nonsecretor       | MCP 1            | -0.00 (-0.02 - 0.01)  | 0.837   | 0.837              | FALSE                   |
| Secretor    | Nonsecretor       | MCP 2            | -0.02 (-0.04 - 0.01)  | 0.199   | 0.199              | FALSE                   |
| Secretor    | Nonsecretor       | MCP 4            | -0.02 (-0.05 - 0.01)  | 0.302   | 0.302              | FALSE                   |
| Secretor    | Nonsecretor       | MDC              | 0.01 (-0.01 - 0.03)   | 0.173   | 0.173              | FALSE                   |
| Secretor    | Nonsecretor       | MIP 1B           | -0.01 (-0.03 - 0.02)  | 0.696   | 0.696              | FALSE                   |
| Secretor    | Nonsecretor       | MIP 1D           | -0.01 (-0.03 - 0.01)  | 0.261   | 0.262              | FALSE                   |
| Secretor    | Nonsecretor       | PAI 1            | 0.02 (-0.01 - 0.04)   | 0.185   | 0.185              | FALSE                   |
| Secretor    | Nonsecretor       | PP               | -0.09 (-0.17 - -0.01) | 0.030   | 0.030              | FALSE                   |
| Secretor    | Nonsecretor       | RESISTIN         | 0.04 (0.01 - 0.07)    | 0.012   | 0.012              | FALSE                   |
| Secretor    | Nonsecretor       | SAA              | 0.02 (-0.03 - 0.07)   | 0.388   | 0.388              | FALSE                   |
| Secretor    | Nonsecretor       | SAP              | 0.01 (-0.01 - 0.02)   | 0.243   | 0.243              | FALSE                   |
| Secretor    | Nonsecretor       | SDF 1A B         | 0.00 (-0.02 - 0.02)   | 0.990   | 0.990              | FALSE                   |
| Secretor    | Nonsecretor       | SEGFR            | 0.00 (-0.01 - 0.01)   | 0.717   | 0.717              | FALSE                   |
| Secretor    | Nonsecretor       | SGP130           | 0.01 (0.00 - 0.02)    | 0.030   | 0.030              | FALSE                   |
| Secretor    | Nonsecretor       | SIL4R            | 0.00 (-0.01 - 0.01)   | 0.867   | 0.867              | FALSE                   |
| Secretor    | Nonsecretor       | SIL6R            | 0.00 (-0.01 - 0.02)   | 0.455   | 0.455              | FALSE                   |
| Secretor    | Nonsecretor       | SILRII           | 0.01 (-0.01 - 0.02)   | 0.316   | 0.317              | FALSE                   |
| Secretor    | Nonsecretor       | STNFRI           | -0.00 (-0.02 - 0.01)  | 0.672   | 0.672              | FALSE                   |
| Secretor    | Nonsecretor       | STNFRII          | 0.01 (-0.01 - 0.02)   | 0.383   | 0.383              | FALSE                   |
| Secretor    | Nonsecretor       | SVEGFR2          | 0.00 (-0.01 - 0.01)   | 0.818   | 0.818              | FALSE                   |
| Secretor    | Nonsecretor       | SVEGFR3          | 0.03 (-0.00 - 0.05)   | 0.079   | 0.079              | FALSE                   |
| Secretor    | Nonsecretor       | TARC             | -0.00 (-0.03 - 0.02)  | 0.938   | 0.938              | FALSE                   |
| Secretor    | Nonsecretor       | TGF A            | 0.01 (-0.03 - 0.06)   | 0.576   | 0.576              | FALSE                   |
| Secretor    | Nonsecretor       | TGF B1           | 0.03 (-0.02 - 0.09)   | 0.206   | 0.206              | FALSE                   |
| Secretor    | Nonsecretor       | TNFA             | 0.01 (-0.01 - 0.03)   | 0.460   | 0.460              | FALSE                   |
| Secretor    | Nonsecretor       | TPO              | -0.03 (-0.10 - 0.03)  | 0.285   | 0.285              | FALSE                   |
| Secretor    | Nonsecretor       | TRAIL            | 0.01 (-0.02 - 0.03)   | 0.576   | 0.576              | FALSE                   |
| Secretor    | Nonsecretor       | VEGF             | 0.00 (-0.05 - 0.06)   | 0.921   | 0.921              | FALSE                   |
| Secretor    | Nonsecretor       | X6CKINE          | 0.01 (-0.03 - 0.04)   | 0.628   | 0.628              | FALSE                   |
| Dombrock    | DoA+B+            | ADIPONECTIN      | 0.04 (0.01 - 0.07)    | 0.011   | 0.041              | FALSE                   |

|          |        |                  |                       |       |       |       |
|----------|--------|------------------|-----------------------|-------|-------|-------|
| Dombrock | DoA-B+ | ADIPONECTIN      | 0.03 (-0.02 - 0.07)   | 0.216 | 0.041 | FALSE |
| Dombrock | DoA+B+ | ADIPSIN          | -0.00 (-0.02 - 0.01)  | 0.645 | 0.899 | FALSE |
| Dombrock | DoA-B+ | ADIPSIN          | -0.00 (-0.03 - 0.02)  | 0.786 | 0.899 | FALSE |
| Dombrock | DoA+B+ | AMYLIN           | 0.05 (-0.03 - 0.13)   | 0.232 | 0.429 | FALSE |
| Dombrock | DoA-B+ | AMYLIN           | 0.00 (-0.11 - 0.11)   | 0.966 | 0.429 | FALSE |
| Dombrock | DoA+B+ | BCA 1            | 0.01 (-0.00 - 0.03)   | 0.079 | 0.210 | FALSE |
| Dombrock | DoA-B+ | BCA 1            | 0.01 (-0.02 - 0.03)   | 0.595 | 0.210 | FALSE |
| Dombrock | DoA+B+ | C PEPTIDE        | 0.03 (-0.00 - 0.07)   | 0.080 | 0.214 | FALSE |
| Dombrock | DoA-B+ | C PEPTIDE        | 0.02 (-0.03 - 0.07)   | 0.385 | 0.214 | FALSE |
| Dombrock | DoA+B+ | CCL19 MIP3B      | -0.01 (-0.03 - 0.01)  | 0.175 | 0.003 | FALSE |
| Dombrock | DoA-B+ | CCL19 MIP3B      | -0.04 (-0.06 - -0.02) | 0.001 | 0.003 | FALSE |
| Dombrock | DoA+B+ | CCL20 MIP3A      | -0.01 (-0.05 - 0.02)  | 0.373 | 0.040 | FALSE |
| Dombrock | DoA-B+ | CCL20 MIP3A      | -0.05 (-0.10 - -0.01) | 0.012 | 0.040 | FALSE |
| Dombrock | DoA+B+ | CRP              | -0.02 (-0.05 - 0.02)  | 0.344 | 0.487 | FALSE |
| Dombrock | DoA-B+ | CRP              | -0.03 (-0.07 - 0.02)  | 0.285 | 0.487 | FALSE |
| Dombrock | DoA+B+ | CTACK            | 0.00 (-0.01 - 0.01)   | 0.404 | 0.586 | FALSE |
| Dombrock | DoA-B+ | CTACK            | 0.01 (-0.01 - 0.02)   | 0.368 | 0.586 | FALSE |
| Dombrock | DoA+B+ | CXCL11 I TAC     | -0.00 (-0.02 - 0.02)  | 0.869 | 0.902 | FALSE |
| Dombrock | DoA-B+ | CXCL11 I TAC     | 0.00 (-0.03 - 0.03)   | 0.751 | 0.902 | FALSE |
| Dombrock | DoA+B+ | CXCL6 GCP2       | -0.01 (-0.03 - 0.00)  | 0.089 | 0.230 | FALSE |
| Dombrock | DoA-B+ | CXCL6 GCP2       | -0.01 (-0.03 - 0.01)  | 0.349 | 0.230 | FALSE |
| Dombrock | DoA+B+ | CXCL9 MIG        | 0.01 (-0.01 - 0.03)   | 0.358 | 0.076 | FALSE |
| Dombrock | DoA-B+ | CXCL9 MIG        | -0.02 (-0.05 - 0.01)  | 0.131 | 0.076 | FALSE |
| Dombrock | DoA+B+ | EGF              | 0.02 (-0.02 - 0.05)   | 0.374 | 0.315 | FALSE |
| Dombrock | DoA-B+ | EGF              | 0.04 (-0.01 - 0.08)   | 0.134 | 0.315 | FALSE |
| Dombrock | DoA+B+ | ENA 78           | -0.01 (-0.03 - 0.00)  | 0.087 | 0.121 | FALSE |
| Dombrock | DoA-B+ | ENA 78           | -0.02 (-0.04 - 0.00)  | 0.079 | 0.121 | FALSE |
| Dombrock | DoA+B+ | EOTAXIN 2        | 0.00 (-0.02 - 0.03)   | 0.685 | 0.920 | FALSE |
| Dombrock | DoA-B+ | EOTAXIN 2        | 0.00 (-0.03 - 0.04)   | 0.823 | 0.920 | FALSE |
| Dombrock | DoA+B+ | EOTAXIN          | 0.01 (-0.00 - 0.03)   | 0.063 | 0.177 | FALSE |
| Dombrock | DoA-B+ | EOTAXIN          | 0.01 (-0.01 - 0.03)   | 0.346 | 0.177 | FALSE |
| Dombrock | DoA+B+ | G CSF            | 0.02 (-0.01 - 0.05)   | 0.133 | 0.300 | FALSE |
| Dombrock | DoA-B+ | G CSF            | 0.02 (-0.02 - 0.05)   | 0.328 | 0.300 | FALSE |
| Dombrock | DoA+B+ | GIP              | -0.00 (-0.06 - 0.06)  | 0.987 | 0.812 | FALSE |
| Dombrock | DoA-B+ | GIP              | 0.02 (-0.06 - 0.11)   | 0.561 | 0.812 | FALSE |
| Dombrock | DoA+B+ | GRO              | -0.00 (-0.01 - 0.01)  | 0.584 | 0.554 | FALSE |
| Dombrock | DoA-B+ | GRO              | 0.00 (-0.01 - 0.02)   | 0.536 | 0.554 | FALSE |
| Dombrock | DoA+B+ | IL 13            | -0.27 (-0.56 - 0.02)  | 0.064 | 0.160 | FALSE |
| Dombrock | DoA-B+ | IL 13            | -0.45 (-1.00 - 0.11)  | 0.113 | 0.160 | FALSE |
| Dombrock | DoA+B+ | IL 16            | 0.01 (-0.03 - 0.06)   | 0.494 | 0.515 | FALSE |
| Dombrock | DoA-B+ | IL 16            | -0.02 (-0.07 - 0.04)  | 0.595 | 0.515 | FALSE |
| Dombrock | DoA+B+ | IL 17            | -0.05 (-0.15 - 0.06)  | 0.361 | 0.030 | FALSE |
| Dombrock | DoA-B+ | IL 17            | -0.19 (-0.34 - -0.05) | 0.008 | 0.030 | FALSE |
| Dombrock | DoA+B+ | IL 23            | 0.44 (-0.13 - 1.00)   | 0.130 | 0.014 | FALSE |
| Dombrock | DoA-B+ | IL 23            | 1.12 (0.40 - 1.85)    | 0.002 | 0.014 | FALSE |
| Dombrock | DoA+B+ | IL 8             | 0.01 (-0.02 - 0.03)   | 0.555 | 0.598 | FALSE |
| Dombrock | DoA-B+ | IL 8             | 0.02 (-0.02 - 0.05)   | 0.317 | 0.598 | FALSE |
| Dombrock | DoA+B+ | INSULIN          | 0.06 (0.01 - 0.11)    | 0.027 | 0.060 | FALSE |
| Dombrock | DoA-B+ | INSULIN          | 0.00 (-0.07 - 0.08)   | 0.943 | 0.060 | FALSE |
| Dombrock | DoA+B+ | IP 10            | -0.00 (-0.02 - 0.01)  | 0.712 | 0.479 | FALSE |
| Dombrock | DoA-B+ | IP 10            | -0.01 (-0.03 - 0.01)  | 0.228 | 0.479 | FALSE |
| Dombrock | DoA+B+ | LEPTIN           | 0.07 (0.01 - 0.12)    | 0.014 | 0.050 | FALSE |
| Dombrock | DoA-B+ | LEPTIN           | 0.05 (-0.03 - 0.12)   | 0.216 | 0.050 | FALSE |
| Dombrock | DoA+B+ | LIPOCALIN 2 NGAL | -0.01 (-0.05 - 0.03)  | 0.502 | 0.620 | FALSE |
| Dombrock | DoA-B+ | LIPOCALIN 2 NGAL | -0.03 (-0.09 - 0.03)  | 0.349 | 0.620 | FALSE |
| Dombrock | DoA+B+ | MCP 1            | 0.00 (-0.01 - 0.02)   | 0.430 | 0.116 | FALSE |
| Dombrock | DoA-B+ | MCP 1            | 0.02 (0.00 - 0.03)    | 0.039 | 0.116 | FALSE |
| Dombrock | DoA+B+ | MCP 2            | -0.00 (-0.02 - 0.02)  | 0.963 | 0.891 | FALSE |
| Dombrock | DoA-B+ | MCP 2            | 0.01 (-0.02 - 0.03)   | 0.682 | 0.891 | FALSE |

|          |        |             |                       |       |       |       |
|----------|--------|-------------|-----------------------|-------|-------|-------|
| Dombrock | DoA+B+ | MCP 4       | 0.00 (-0.02 - 0.03)   | 0.813 | 0.914 | FALSE |
| Dombrock | DoA-B+ | MCP 4       | -0.00 (-0.04 - 0.03)  | 0.829 | 0.914 | FALSE |
| Dombrock | DoA+B+ | MDC         | -0.01 (-0.02 - 0.00)  | 0.182 | 0.379 | FALSE |
| Dombrock | DoA-B+ | MDC         | -0.00 (-0.02 - 0.01)  | 0.831 | 0.379 | FALSE |
| Dombrock | DoA+B+ | MIP 1B      | -0.01 (-0.03 - 0.01)  | 0.234 | 0.002 | FALSE |
| Dombrock | DoA-B+ | MIP 1B      | 0.03 (0.01 - 0.06)    | 0.014 | 0.002 | FALSE |
| Dombrock | DoA+B+ | MIP 1D      | -0.01 (-0.02 - 0.01)  | 0.478 | 0.201 | FALSE |
| Dombrock | DoA-B+ | MIP 1D      | 0.01 (-0.01 - 0.03)   | 0.266 | 0.201 | FALSE |
| Dombrock | DoA+B+ | PAI 1       | -0.01 (-0.03 - 0.01)  | 0.338 | 0.326 | FALSE |
| Dombrock | DoA-B+ | PAI 1       | -0.02 (-0.05 - 0.01)  | 0.146 | 0.326 | FALSE |
| Dombrock | DoA+B+ | PP          | 0.02 (-0.04 - 0.08)   | 0.483 | 0.574 | FALSE |
| Dombrock | DoA-B+ | PP          | 0.05 (-0.04 - 0.14)   | 0.320 | 0.574 | FALSE |
| Dombrock | DoA+B+ | RESISTIN    | -0.02 (-0.04 - 0.01)  | 0.209 | 0.428 | FALSE |
| Dombrock | DoA-B+ | RESISTIN    | -0.01 (-0.04 - 0.03)  | 0.763 | 0.428 | FALSE |
| Dombrock | DoA+B+ | SAA         | -0.01 (-0.05 - 0.02)  | 0.457 | 0.246 | FALSE |
| Dombrock | DoA-B+ | SAA         | -0.04 (-0.09 - 0.01)  | 0.094 | 0.246 | FALSE |
| Dombrock | DoA+B+ | SAP         | -0.00 (-0.01 - 0.01)  | 0.726 | 0.769 | FALSE |
| Dombrock | DoA-B+ | SAP         | -0.01 (-0.02 - 0.01)  | 0.469 | 0.769 | FALSE |
| Dombrock | DoA+B+ | SDF 1A B    | 0.01 (-0.01 - 0.02)   | 0.281 | 0.524 | FALSE |
| Dombrock | DoA-B+ | SDF 1A B    | 0.00 (-0.02 - 0.02)   | 0.906 | 0.524 | FALSE |
| Dombrock | DoA+B+ | SEGFR       | 0.00 (-0.01 - 0.01)   | 0.712 | 0.881 | FALSE |
| Dombrock | DoA-B+ | SEGFR       | 0.00 (-0.01 - 0.01)   | 0.643 | 0.881 | FALSE |
| Dombrock | DoA+B+ | SGP130      | -0.00 (-0.01 - 0.00)  | 0.423 | 0.725 | FALSE |
| Dombrock | DoA-B+ | SGP130      | -0.00 (-0.01 - 0.01)  | 0.772 | 0.725 | FALSE |
| Dombrock | DoA+B+ | SIL4R       | -0.01 (-0.03 - -0.00) | 0.036 | 0.040 | FALSE |
| Dombrock | DoA-B+ | SIL4R       | -0.02 (-0.04 - -0.00) | 0.028 | 0.040 | FALSE |
| Dombrock | DoA+B+ | SIL6R       | 0.01 (-0.00 - 0.01)   | 0.252 | 0.386 | FALSE |
| Dombrock | DoA-B+ | SIL6R       | 0.01 (-0.01 - 0.02)   | 0.245 | 0.386 | FALSE |
| Dombrock | DoA+B+ | SILRII      | -0.00 (-0.02 - 0.01)  | 0.484 | 0.685 | FALSE |
| Dombrock | DoA-B+ | SILRII      | -0.01 (-0.02 - 0.01)  | 0.441 | 0.685 | FALSE |
| Dombrock | DoA+B+ | STNFRI      | 0.00 (-0.01 - 0.01)   | 0.813 | 0.945 | FALSE |
| Dombrock | DoA-B+ | STNFRI      | -0.00 (-0.01 - 0.01)  | 0.925 | 0.945 | FALSE |
| Dombrock | DoA+B+ | STNFRII     | -0.00 (-0.01 - 0.01)  | 0.758 | 0.211 | FALSE |
| Dombrock | DoA-B+ | STNFRII     | -0.01 (-0.02 - 0.00)  | 0.089 | 0.211 | FALSE |
| Dombrock | DoA+B+ | SVEGFR2     | -0.00 (-0.01 - 0.01)  | 0.849 | 0.495 | FALSE |
| Dombrock | DoA-B+ | SVEGFR2     | -0.01 (-0.02 - 0.01)  | 0.267 | 0.495 | FALSE |
| Dombrock | DoA+B+ | SVEGFR3     | 0.01 (-0.02 - 0.03)   | 0.649 | 0.636 | FALSE |
| Dombrock | DoA-B+ | SVEGFR3     | 0.02 (-0.02 - 0.05)   | 0.342 | 0.636 | FALSE |
| Dombrock | DoA+B+ | TARC        | 0.00 (-0.01 - 0.02)   | 0.653 | 0.854 | FALSE |
| Dombrock | DoA-B+ | TARC        | -0.00 (-0.03 - 0.03)  | 0.900 | 0.854 | FALSE |
| Dombrock | DoA+B+ | TGF A       | -0.02 (-0.05 - 0.02)  | 0.418 | 0.002 | FALSE |
| Dombrock | DoA-B+ | TGF A       | -0.09 (-0.13 - -0.04) | 0.001 | 0.002 | FALSE |
| Dombrock | DoA+B+ | TGF B1      | 0.00 (-0.04 - 0.04)   | 0.980 | 0.948 | FALSE |
| Dombrock | DoA-B+ | TGF B1      | -0.01 (-0.06 - 0.04)  | 0.797 | 0.948 | FALSE |
| Dombrock | DoA+B+ | TNFA        | 0.01 (-0.01 - 0.03)   | 0.192 | 0.426 | FALSE |
| Dombrock | DoA-B+ | TNFA        | 0.01 (-0.01 - 0.02)   | 0.609 | 0.426 | FALSE |
| Dombrock | DoA+B+ | TPO         | -0.00 (-0.05 - 0.05)  | 0.978 | 0.102 | FALSE |
| Dombrock | DoA-B+ | TPO         | -0.07 (-0.13 - 0.00)  | 0.057 | 0.102 | FALSE |
| Dombrock | DoA+B+ | TRAIL       | 0.00 (-0.01 - 0.02)   | 0.586 | 0.854 | FALSE |
| Dombrock | DoA-B+ | TRAIL       | 0.00 (-0.02 - 0.03)   | 0.707 | 0.854 | FALSE |
| Dombrock | DoA+B+ | VEGF        | 0.02 (-0.03 - 0.06)   | 0.466 | 0.592 | FALSE |
| Dombrock | DoA-B+ | VEGF        | -0.01 (-0.07 - 0.05)  | 0.720 | 0.592 | FALSE |
| Dombrock | DoA+B+ | X6CKINE     | 0.01 (-0.02 - 0.03)   | 0.608 | 0.304 | FALSE |
| Dombrock | DoA-B+ | X6CKINE     | -0.02 (-0.06 - 0.02)  | 0.274 | 0.304 | FALSE |
| RhE      | Ee     | ADIPONECTIN | -0.01 (-0.04 - 0.03)  | 0.641 | 0.257 | FALSE |
| RhE      | ee     | ADIPONECTIN | 0.10 (-0.03 - 0.22)   | 0.124 | 0.257 | FALSE |
| RhE      | Ee     | ADIPSIN     | -0.01 (-0.03 - 0.01)  | 0.265 | 0.524 | FALSE |
| RhE      | ee     | ADIPSIN     | -0.01 (-0.08 - 0.05)  | 0.721 | 0.524 | FALSE |
| RhE      | Ee     | AMYLIN      | -0.02 (-0.12 - 0.08)  | 0.659 | 0.278 | FALSE |



|     |    |                  |                      |       |       |       |
|-----|----|------------------|----------------------|-------|-------|-------|
| RhE | ee | AMYLIN           | 0.16 (-0.05 -0.37)   | 0.137 | 0.278 | FALSE |
| RhE | Ee | BCA 1            | -0.00 (-0.02 -0.02)  | 0.670 | 0.070 | FALSE |
| RhE | ee | BCA 1            | -0.07 (-0.13 --0.01) | 0.022 | 0.070 | FALSE |
| RhE | Ee | C PEPTIDE        | -0.01 (-0.07 -0.04)  | 0.569 | 0.207 | FALSE |
| RhE | ee | C PEPTIDE        | 0.08 (-0.02 -0.18)   | 0.103 | 0.207 | FALSE |
| RhE | Ee | CCL19 MIP3B      | -0.02 (-0.04 --0.00) | 0.041 | 0.022 | FALSE |
| RhE | ee | CCL19 MIP3B      | -0.06 (-0.13 --0.00) | 0.046 | 0.022 | FALSE |
| RhE | Ee | CCL20 MIP3A      | -0.01 (-0.05 -0.03)  | 0.610 | 0.854 | FALSE |
| RhE | ee | CCL20 MIP3A      | 0.01 (-0.11 -0.13)   | 0.844 | 0.854 | FALSE |
| RhE | Ee | CRP              | -0.02 (-0.07 -0.02)  | 0.262 | 0.493 | FALSE |
| RhE | ee | CRP              | -0.04 (-0.21 -0.13)  | 0.651 | 0.493 | FALSE |
| RhE | Ee | CTACK            | 0.02 (0.01 -0.03)    | 0.000 | 0.001 | FALSE |
| RhE | ee | CTACK            | 0.01 (-0.02 -0.05)   | 0.444 | 0.001 | FALSE |
| RhE | Ee | CXCL11 I TAC     | -0.00 (-0.03 -0.02)  | 0.898 | 0.272 | FALSE |
| RhE | ee | CXCL11 I TAC     | -0.07 (-0.15 -0.01)  | 0.107 | 0.272 | FALSE |
| RhE | Ee | CXCL6 GCP2       | 0.00 (-0.01 -0.02)   | 0.710 | 0.928 | FALSE |
| RhE | ee | CXCL6 GCP2       | -0.00 (-0.07 -0.06)  | 0.935 | 0.928 | FALSE |
| RhE | Ee | CXCL9 MIG        | -0.01 (-0.03 -0.02)  | 0.558 | 0.751 | FALSE |
| RhE | ee | CXCL9 MIG        | -0.02 (-0.09 -0.05)  | 0.606 | 0.751 | FALSE |
| RhE | Ee | EGF              | 0.00 (-0.04 -0.04)   | 0.942 | 0.890 | FALSE |
| RhE | ee | EGF              | 0.03 (-0.10 -0.16)   | 0.630 | 0.890 | FALSE |
| RhE | Ee | ENA 78           | 0.01 (-0.01 -0.04)   | 0.160 | 0.331 | FALSE |
| RhE | ee | ENA 78           | 0.02 (-0.06 -0.10)   | 0.575 | 0.331 | FALSE |
| RhE | Ee | EOTAXIN 2        | 0.00 (-0.03 -0.03)   | 0.951 | 0.978 | FALSE |
| RhE | ee | EOTAXIN 2        | 0.01 (-0.07 -0.08)   | 0.837 | 0.978 | FALSE |
| RhE | Ee | EOTAXIN          | 0.00 (-0.01 -0.02)   | 0.654 | 0.822 | FALSE |
| RhE | ee | EOTAXIN          | 0.01 (-0.03 -0.06)   | 0.635 | 0.822 | FALSE |
| RhE | Ee | G CSF            | 0.00 (-0.03 -0.03)   | 0.991 | 0.675 | FALSE |
| RhE | ee | G CSF            | -0.05 (-0.15 -0.06)  | 0.377 | 0.675 | FALSE |
| RhE | Ee | GIP              | -0.05 (-0.12 -0.02)  | 0.176 | 0.001 | FALSE |
| RhE | ee | GIP              | 0.34 (0.14 -0.53)    | 0.001 | 0.001 | FALSE |
| RhE | Ee | GRO              | 0.00 (-0.01 -0.02)   | 0.809 | 0.565 | FALSE |
| RhE | ee | GRO              | 0.03 (-0.02 -0.07)   | 0.292 | 0.565 | FALSE |
| RhE | Ee | IL 16            | -0.04 (-0.10 -0.01)  | 0.084 | 0.205 | FALSE |
| RhE | ee | IL 16            | -0.05 (-0.25 -0.14)  | 0.597 | 0.205 | FALSE |
| RhE | Ee | IL 17            | -0.02 (-0.15 -0.11)  | 0.777 | 0.539 | FALSE |
| RhE | ee | IL 17            | 0.22 (-0.19 -0.63)   | 0.293 | 0.539 | FALSE |
| RhE | Ee | IL 8             | 0.01 (-0.03 -0.04)   | 0.711 | 0.911 | FALSE |
| RhE | ee | IL 8             | 0.02 (-0.12 -0.15)   | 0.809 | 0.911 | FALSE |
| RhE | Ee | INSULIN          | 0.01 (-0.05 -0.08)   | 0.664 | 0.542 | FALSE |
| RhE | ee | INSULIN          | 0.09 (-0.08 -0.25)   | 0.294 | 0.542 | FALSE |
| RhE | Ee | IP 10            | -0.02 (-0.03 -0.00)  | 0.090 | 0.083 | FALSE |
| RhE | ee | IP 10            | -0.04 (-0.08 -0.01)  | 0.113 | 0.083 | FALSE |
| RhE | Ee | LEPTIN           | 0.00 (-0.06 -0.07)   | 0.913 | 0.931 | FALSE |
| RhE | ee | LEPTIN           | -0.03 (-0.20 -0.14)  | 0.726 | 0.931 | FALSE |
| RhE | Ee | LIPOCALIN 2 NGAL | -0.07 (-0.13 --0.01) | 0.030 | 0.033 | FALSE |
| RhE | ee | LIPOCALIN 2 NGAL | -0.29 (-0.68 -0.09)  | 0.133 | 0.033 | FALSE |
| RhE | Ee | MCP 1            | -0.00 (-0.02 -0.01)  | 0.710 | 0.673 | FALSE |
| RhE | ee | MCP 1            | -0.02 (-0.06 -0.02)  | 0.406 | 0.673 | FALSE |
| RhE | Ee | MCP 2            | 0.01 (-0.01 -0.03)   | 0.305 | 0.000 | FALSE |
| RhE | ee | MCP 2            | 0.09 (0.05 -0.13)    | 0.000 | 0.000 | FALSE |
| RhE | Ee | MCP 4            | 0.01 (-0.02 -0.04)   | 0.687 | 0.919 | FALSE |
| RhE | ee | MCP 4            | 0.01 (-0.08 -0.09)   | 0.910 | 0.919 | FALSE |
| RhE | Ee | MDC              | -0.00 (-0.02 -0.01)  | 0.778 | 0.934 | FALSE |
| RhE | ee | MDC              | -0.01 (-0.06 -0.05)  | 0.799 | 0.934 | FALSE |
| RhE | Ee | MIP 1B           | 0.02 (-0.01 -0.04)   | 0.187 | 0.231 | FALSE |
| RhE | ee | MIP 1B           | 0.05 (-0.03 -0.14)   | 0.233 | 0.231 | FALSE |
| RhE | Ee | MIP 1D           | 0.02 (-0.00 -0.04)   | 0.104 | 0.245 | FALSE |
| RhE | ee | MIP 1D           | -0.01 (-0.06 -0.05)  | 0.775 | 0.245 | FALSE |

|      |        |             |                     |       |       |       |
|------|--------|-------------|---------------------|-------|-------|-------|
| RhE  | Ee     | PAI 1       | -0.02 (-0.04 -0.01) | 0.162 | 0.007 | FALSE |
| RhE  | ee     | PAI 1       | -0.11 (-0.19 -0.04) | 0.003 | 0.007 | FALSE |
| RhE  | Ee     | PP          | -0.07 (-0.15 -0.01) | 0.098 | 0.074 | FALSE |
| RhE  | ee     | PP          | 0.14 (-0.05 -0.32)  | 0.151 | 0.074 | FALSE |
| RhE  | Ee     | RESISTIN    | -0.01 (-0.04 -0.03) | 0.666 | 0.001 | FALSE |
| RhE  | ee     | RESISTIN    | -0.22 (-0.33 -0.11) | 0.000 | 0.001 | FALSE |
| RhE  | Ee     | SAA         | -0.02 (-0.06 -0.02) | 0.316 | 0.583 | FALSE |
| RhE  | ee     | SAA         | -0.03 (-0.18 -0.12) | 0.731 | 0.583 | FALSE |
| RhE  | Ee     | SAP         | -0.01 (-0.02 -0.00) | 0.179 | 0.282 | FALSE |
| RhE  | ee     | SAP         | 0.01 (-0.03 -0.05)  | 0.470 | 0.282 | FALSE |
| RhE  | Ee     | SDF 1A B    | 0.01 (-0.01 -0.02)  | 0.240 | 0.370 | FALSE |
| RhE  | ee     | SDF 1A B    | 0.02 (-0.03 -0.08)  | 0.389 | 0.370 | FALSE |
| RhE  | Ee     | SEGFR       | 0.01 (-0.00 -0.01)  | 0.130 | 0.272 | FALSE |
| RhE  | ee     | SEGFR       | 0.01 (-0.01 -0.03)  | 0.496 | 0.272 | FALSE |
| RhE  | Ee     | SGP130      | 0.00 (-0.01 -0.01)  | 0.492 | 0.643 | FALSE |
| RhE  | ee     | SGP130      | -0.01 (-0.04 -0.02) | 0.556 | 0.643 | FALSE |
| RhE  | Ee     | SIL4R       | -0.00 (-0.02 -0.01) | 0.879 | 0.773 | FALSE |
| RhE  | ee     | SIL4R       | -0.02 (-0.08 -0.04) | 0.479 | 0.773 | FALSE |
| RhE  | Ee     | SIL6R       | 0.01 (-0.00 -0.02)  | 0.254 | 0.504 | FALSE |
| RhE  | ee     | SIL6R       | 0.01 (-0.04 -0.05)  | 0.742 | 0.504 | FALSE |
| RhE  | Ee     | SILRII      | 0.02 (0.00 -0.03)   | 0.014 | 0.019 | FALSE |
| RhE  | ee     | SILRII      | -0.04 (-0.10 -0.02) | 0.220 | 0.019 | FALSE |
| RhE  | Ee     | STNFRI      | 0.01 (-0.00 -0.02)  | 0.133 | 0.278 | FALSE |
| RhE  | ee     | STNFRI      | -0.01 (-0.04 -0.03) | 0.671 | 0.278 | FALSE |
| RhE  | Ee     | STNFRII     | 0.01 (-0.01 -0.02)  | 0.363 | 0.356 | FALSE |
| RhE  | ee     | STNFRII     | -0.02 (-0.06 -0.02) | 0.291 | 0.356 | FALSE |
| RhE  | Ee     | SVEGFR2     | 0.00 (-0.01 -0.01)  | 0.583 | 0.856 | FALSE |
| RhE  | ee     | SVEGFR2     | -0.00 (-0.03 -0.03) | 0.954 | 0.856 | FALSE |
| RhE  | Ee     | SVEGFR3     | 0.02 (-0.01 -0.05)  | 0.193 | 0.370 | FALSE |
| RhE  | ee     | SVEGFR3     | -0.02 (-0.11 -0.07) | 0.655 | 0.370 | FALSE |
| RhE  | Ee     | TARC        | 0.01 (-0.01 -0.04)  | 0.319 | 0.606 | FALSE |
| RhE  | ee     | TARC        | 0.01 (-0.08 -0.10)  | 0.878 | 0.606 | FALSE |
| RhE  | Ee     | TGF A       | -0.00 (-0.05 -0.04) | 0.958 | 0.832 | FALSE |
| RhE  | ee     | TGF A       | -0.05 (-0.22 -0.11) | 0.545 | 0.832 | FALSE |
| RhE  | Ee     | TGF B1      | 0.02 (-0.03 -0.07)  | 0.413 | 0.004 | FALSE |
| RhE  | ee     | TGF B1      | -0.06 (-0.10 -0.01) | 0.010 | 0.004 | FALSE |
| RhE  | Ee     | TNFA        | -0.00 (-0.02 -0.02) | 0.928 | 0.982 | FALSE |
| RhE  | ee     | TNFA        | -0.01 (-0.07 -0.06) | 0.862 | 0.982 | FALSE |
| RhE  | Ee     | TPO         | -0.04 (-0.10 -0.02) | 0.231 | 0.488 | FALSE |
| RhE  | ee     | TPO         | -0.01 (-0.25 -0.23) | 0.952 | 0.488 | FALSE |
| RhE  | Ee     | TRAIL       | 0.00 (-0.02 -0.02)  | 0.800 | 0.780 | FALSE |
| RhE  | ee     | TRAIL       | 0.02 (-0.04 -0.08)  | 0.500 | 0.780 | FALSE |
| RhE  | Ee     | VEGF        | -0.02 (-0.07 -0.04) | 0.499 | 0.685 | FALSE |
| RhE  | ee     | VEGF        | 0.05 (-0.13 -0.22)  | 0.613 | 0.685 | FALSE |
| RhE  | Ee     | X6CKINE     | -0.00 (-0.03 -0.03) | 0.882 | 0.920 | FALSE |
| RhE  | ee     | X6CKINE     | 0.02 (-0.08 -0.12)  | 0.712 | 0.920 | FALSE |
| Kidd | JkA+B+ | ADIPONECTIN | 0.01 (-0.03 -0.04)  | 0.662 | 0.523 | FALSE |
| Kidd | JkA-B+ | ADIPONECTIN | -0.01 (-0.06 -0.03) | 0.602 | 0.523 | FALSE |
| Kidd | JkA+B+ | ADIPSIN     | 0.01 (-0.01 -0.03)  | 0.349 | 0.190 | FALSE |
| Kidd | JkA-B+ | ADIPSIN     | 0.02 (-0.00 -0.05)  | 0.081 | 0.190 | FALSE |
| Kidd | JkA+B+ | AMYLIN      | -0.08 (-0.16 -0.00) | 0.064 | 0.180 | FALSE |
| Kidd | JkA-B+ | AMYLIN      | -0.05 (-0.14 -0.05) | 0.348 | 0.180 | FALSE |
| Kidd | JkA+B+ | BCA 1       | -0.01 (-0.03 -0.01) | 0.171 | 0.376 | FALSE |
| Kidd | JkA-B+ | BCA 1       | -0.00 (-0.03 -0.02) | 0.646 | 0.376 | FALSE |
| Kidd | JkA+B+ | C PEPTIDE   | -0.01 (-0.05 -0.03) | 0.519 | 0.678 | FALSE |
| Kidd | JkA-B+ | C PEPTIDE   | 0.00 (-0.05 -0.06)  | 0.855 | 0.678 | FALSE |
| Kidd | JkA+B+ | CCL19 MIP3B | 0.01 (-0.01 -0.02)  | 0.588 | 0.379 | FALSE |
| Kidd | JkA-B+ | CCL19 MIP3B | 0.02 (-0.01 -0.04)  | 0.172 | 0.379 | FALSE |
| Kidd | JkA+B+ | CCL20 MIP3A | -0.01 (-0.05 -0.02) | 0.462 | 0.135 | FALSE |

|      |        |                  |                       |       |       |       |
|------|--------|------------------|-----------------------|-------|-------|-------|
| Kidd | JkA-B+ | CCL20 MIP3A      | 0.02 (-0.02 - 0.06)   | 0.245 | 0.135 | FALSE |
| Kidd | JkA+B+ | CRP              | -0.01 (-0.05 - 0.03)  | 0.602 | 0.521 | FALSE |
| Kidd | JkA-B+ | CRP              | 0.01 (-0.03 - 0.06)   | 0.589 | 0.521 | FALSE |
| Kidd | JkA+B+ | CTACK            | -0.01 (-0.02 - 0.00)  | 0.260 | 0.528 | FALSE |
| Kidd | JkA-B+ | CTACK            | -0.00 (-0.01 - 0.01)  | 0.586 | 0.528 | FALSE |
| Kidd | JkA+B+ | CXCL11 I TAC     | 0.00 (-0.02 - 0.02)   | 0.872 | 0.128 | FALSE |
| Kidd | JkA-B+ | CXCL11 I TAC     | 0.02 (-0.00 - 0.05)   | 0.079 | 0.128 | FALSE |
| Kidd | JkA+B+ | CXCL6 GCP2       | -0.00 (-0.02 - 0.01)  | 0.855 | 0.689 | FALSE |
| Kidd | JkA-B+ | CXCL6 GCP2       | -0.01 (-0.03 - 0.01)  | 0.434 | 0.689 | FALSE |
| Kidd | JkA+B+ | CXCL9 MIG        | 0.01 (-0.01 - 0.03)   | 0.541 | 0.021 | FALSE |
| Kidd | JkA-B+ | CXCL9 MIG        | 0.03 (0.01 - 0.06)    | 0.010 | 0.021 | FALSE |
| Kidd | JkA+B+ | EGF              | -0.02 (-0.06 - 0.02)  | 0.265 | 0.153 | FALSE |
| Kidd | JkA-B+ | EGF              | -0.04 (-0.08 - 0.00)  | 0.053 | 0.153 | FALSE |
| Kidd | JkA+B+ | ENA 78           | -0.00 (-0.02 - 0.02)  | 0.762 | 0.934 | FALSE |
| Kidd | JkA-B+ | ENA 78           | -0.00 (-0.02 - 0.02)  | 0.997 | 0.934 | FALSE |
| Kidd | JkA+B+ | EOTAXIN 2        | 0.01 (-0.01 - 0.04)   | 0.276 | 0.443 | FALSE |
| Kidd | JkA-B+ | EOTAXIN 2        | 0.02 (-0.01 - 0.05)   | 0.237 | 0.443 | FALSE |
| Kidd | JkA+B+ | EOTAXIN          | -0.00 (-0.02 - 0.01)  | 0.917 | 0.341 | FALSE |
| Kidd | JkA-B+ | EOTAXIN          | -0.01 (-0.03 - 0.01)  | 0.188 | 0.341 | FALSE |
| Kidd | JkA+B+ | G CSF            | 0.00 (-0.03 - 0.03)   | 0.997 | 0.968 | FALSE |
| Kidd | JkA-B+ | G CSF            | 0.00 (-0.03 - 0.04)   | 0.831 | 0.968 | FALSE |
| Kidd | JkA+B+ | GIP              | -0.01 (-0.07 - 0.06)  | 0.871 | 0.829 | FALSE |
| Kidd | JkA-B+ | GIP              | -0.02 (-0.10 - 0.05)  | 0.557 | 0.829 | FALSE |
| Kidd | JkA+B+ | GRO              | -0.01 (-0.02 - 0.00)  | 0.079 | 0.204 | FALSE |
| Kidd | JkA-B+ | GRO              | -0.01 (-0.02 - 0.01)  | 0.244 | 0.204 | FALSE |
| Kidd | JkA+B+ | IL 13            | 0.10 (-0.38 - 0.58)   | 0.682 | 0.622 | FALSE |
| Kidd | JkA-B+ | IL 13            | 0.21 (-0.22 - 0.65)   | 0.339 | 0.622 | FALSE |
| Kidd | JkA+B+ | IL 16            | -0.02 (-0.06 - 0.03)  | 0.494 | 0.660 | FALSE |
| Kidd | JkA-B+ | IL 16            | -0.02 (-0.08 - 0.03)  | 0.380 | 0.660 | FALSE |
| Kidd | JkA+B+ | IL 17            | -0.05 (-0.17 - 0.06)  | 0.361 | 0.657 | FALSE |
| Kidd | JkA-B+ | IL 17            | -0.04 (-0.17 - 0.09)  | 0.565 | 0.657 | FALSE |
| Kidd | JkA+B+ | IL 23            | 0.12 (-0.61 - 0.84)   | 0.754 | 0.175 | FALSE |
| Kidd | JkA-B+ | IL 23            | -0.62 (-1.29 - 0.04)  | 0.064 | 0.175 | FALSE |
| Kidd | JkA+B+ | IL 8             | -0.01 (-0.04 - 0.02)  | 0.578 | 0.809 | FALSE |
| Kidd | JkA-B+ | IL 8             | 0.00 (-0.03 - 0.03)   | 0.999 | 0.809 | FALSE |
| Kidd | JkA+B+ | INSULIN          | -0.04 (-0.10 - 0.02)  | 0.157 | 0.367 | FALSE |
| Kidd | JkA-B+ | INSULIN          | -0.02 (-0.09 - 0.05)  | 0.535 | 0.367 | FALSE |
| Kidd | JkA+B+ | IP 10            | 0.00 (-0.01 - 0.02)   | 0.542 | 0.358 | FALSE |
| Kidd | JkA-B+ | IP 10            | 0.01 (-0.01 - 0.03)   | 0.154 | 0.358 | FALSE |
| Kidd | JkA+B+ | LEPTIN           | -0.02 (-0.07 - 0.03)  | 0.491 | 0.683 | FALSE |
| Kidd | JkA-B+ | LEPTIN           | -0.03 (-0.11 - 0.05)  | 0.429 | 0.683 | FALSE |
| Kidd | JkA+B+ | LIPOCALIN 2 NGAL | -0.00 (-0.04 - 0.04)  | 0.968 | 0.947 | FALSE |
| Kidd | JkA-B+ | LIPOCALIN 2 NGAL | -0.01 (-0.06 - 0.04)  | 0.755 | 0.947 | FALSE |
| Kidd | JkA+B+ | MCP 1            | -0.01 (-0.02 - 0.00)  | 0.067 | 0.112 | FALSE |
| Kidd | JkA-B+ | MCP 1            | -0.00 (-0.02 - 0.01)  | 0.885 | 0.112 | FALSE |
| Kidd | JkA+B+ | MCP 2            | 0.00 (-0.02 - 0.02)   | 0.915 | 0.007 | FALSE |
| Kidd | JkA-B+ | MCP 2            | -0.03 (-0.06 - -0.01) | 0.008 | 0.007 | FALSE |
| Kidd | JkA+B+ | MCP 4            | -0.02 (-0.04 - 0.01)  | 0.261 | 0.383 | FALSE |
| Kidd | JkA-B+ | MCP 4            | -0.02 (-0.05 - 0.01)  | 0.199 | 0.383 | FALSE |
| Kidd | JkA+B+ | MDC              | -0.01 (-0.03 - -0.00) | 0.032 | 0.065 | FALSE |
| Kidd | JkA-B+ | MDC              | -0.00 (-0.02 - 0.01)  | 0.863 | 0.065 | FALSE |
| Kidd | JkA+B+ | MIP 1B           | -0.01 (-0.03 - 0.02)  | 0.670 | 0.805 | FALSE |
| Kidd | JkA-B+ | MIP 1B           | 0.00 (-0.02 - 0.03)   | 0.852 | 0.805 | FALSE |
| Kidd | JkA+B+ | MIP 1D           | -0.01 (-0.03 - 0.01)  | 0.317 | 0.563 | FALSE |
| Kidd | JkA-B+ | MIP 1D           | -0.01 (-0.03 - 0.01)  | 0.384 | 0.563 | FALSE |
| Kidd | JkA+B+ | PAI 1            | 0.02 (-0.01 - 0.04)   | 0.148 | 0.068 | FALSE |
| Kidd | JkA-B+ | PAI 1            | 0.03 (0.00 - 0.05)    | 0.020 | 0.068 | FALSE |
| Kidd | JkA+B+ | PP               | -0.01 (-0.08 - 0.06)  | 0.784 | 0.523 | FALSE |
| Kidd | JkA-B+ | PP               | 0.03 (-0.05 - 0.11)   | 0.425 | 0.523 | FALSE |

|      |        |             |                      |       |       |       |
|------|--------|-------------|----------------------|-------|-------|-------|
| Kidd | JkA+B+ | RESISTIN    | -0.01 (-0.03 -0.02)  | 0.716 | 0.921 | FALSE |
| Kidd | JkA-B+ | RESISTIN    | -0.00 (-0.03 -0.03)  | 0.964 | 0.921 | FALSE |
| Kidd | JkA+B+ | SAA         | 0.00 (-0.04 -0.04)   | 0.950 | 0.984 | FALSE |
| Kidd | JkA-B+ | SAA         | -0.00 (-0.05 -0.04)  | 0.913 | 0.984 | FALSE |
| Kidd | JkA+B+ | SAP         | -0.01 (-0.02 -0.01)  | 0.413 | 0.568 | FALSE |
| Kidd | JkA-B+ | SAP         | 0.00 (-0.01 -0.02)   | 0.837 | 0.568 | FALSE |
| Kidd | JkA+B+ | SDF 1A B    | -0.01 (-0.02 -0.01)  | 0.365 | 0.090 | FALSE |
| Kidd | JkA-B+ | SDF 1A B    | -0.02 (-0.03 --0.00) | 0.029 | 0.090 | FALSE |
| Kidd | JkA+B+ | SEGFR       | 0.00 (-0.01 -0.01)   | 0.885 | 0.665 | FALSE |
| Kidd | JkA-B+ | SEGFR       | 0.00 (-0.00 -0.01)   | 0.404 | 0.665 | FALSE |
| Kidd | JkA+B+ | SGP130      | -0.00 (-0.01 -0.01)  | 0.778 | 0.336 | FALSE |
| Kidd | JkA-B+ | SGP130      | 0.01 (-0.00 -0.02)   | 0.291 | 0.336 | FALSE |
| Kidd | JkA+B+ | SIL4R       | -0.00 (-0.02 -0.01)  | 0.548 | 0.409 | FALSE |
| Kidd | JkA-B+ | SIL4R       | 0.01 (-0.01 -0.02)   | 0.448 | 0.409 | FALSE |
| Kidd | JkA+B+ | SIL6R       | 0.00 (-0.01 -0.01)   | 0.836 | 0.641 | FALSE |
| Kidd | JkA-B+ | SIL6R       | 0.01 (-0.01 -0.02)   | 0.377 | 0.641 | FALSE |
| Kidd | JkA+B+ | SILRII      | -0.01 (-0.02 -0.01)  | 0.282 | 0.059 | FALSE |
| Kidd | JkA-B+ | SILRII      | 0.01 (-0.01 -0.02)   | 0.260 | 0.059 | FALSE |
| Kidd | JkA+B+ | STNFR1      | -0.01 (-0.02 --0.00) | 0.036 | 0.110 | FALSE |
| Kidd | JkA-B+ | STNFR1      | -0.01 (-0.02 -0.00)  | 0.213 | 0.110 | FALSE |
| Kidd | JkA+B+ | STNFR2      | -0.01 (-0.02 -0.00)  | 0.083 | 0.096 | FALSE |
| Kidd | JkA-B+ | STNFR2      | 0.00 (-0.01 -0.01)   | 0.980 | 0.096 | FALSE |
| Kidd | JkA+B+ | SVEGFR2     | 0.00 (-0.01 -0.01)   | 0.644 | 0.112 | FALSE |
| Kidd | JkA-B+ | SVEGFR2     | 0.01 (0.00 -0.02)    | 0.046 | 0.112 | FALSE |
| Kidd | JkA+B+ | SVEGFR3     | -0.03 (-0.06 --0.01) | 0.009 | 0.013 | FALSE |
| Kidd | JkA-B+ | SVEGFR3     | -0.00 (-0.03 -0.03)  | 0.804 | 0.013 | FALSE |
| Kidd | JkA+B+ | TARC        | -0.01 (-0.03 -0.01)  | 0.472 | 0.581 | FALSE |
| Kidd | JkA-B+ | TARC        | 0.00 (-0.02 -0.03)   | 0.814 | 0.581 | FALSE |
| Kidd | JkA+B+ | TGF A       | 0.04 (-0.00 -0.08)   | 0.081 | 0.153 | FALSE |
| Kidd | JkA-B+ | TGF A       | 0.01 (-0.04 -0.05)   | 0.778 | 0.153 | FALSE |
| Kidd | JkA+B+ | TGF B1      | -0.04 (-0.08 -0.01)  | 0.088 | 0.006 | FALSE |
| Kidd | JkA-B+ | TGF B1      | 0.03 (-0.02 -0.07)   | 0.248 | 0.006 | FALSE |
| Kidd | JkA+B+ | TNFA        | 0.00 (-0.01 -0.02)   | 0.787 | 0.795 | FALSE |
| Kidd | JkA-B+ | TNFA        | 0.01 (-0.01 -0.03)   | 0.500 | 0.795 | FALSE |
| Kidd | JkA+B+ | TPO         | 0.01 (-0.04 -0.07)   | 0.634 | 0.503 | FALSE |
| Kidd | JkA-B+ | TPO         | -0.02 (-0.08 -0.04)  | 0.532 | 0.503 | FALSE |
| Kidd | JkA+B+ | TRAIL       | -0.00 (-0.02 -0.02)  | 0.797 | 0.420 | FALSE |
| Kidd | JkA-B+ | TRAIL       | 0.01 (-0.01 -0.03)   | 0.361 | 0.420 | FALSE |
| Kidd | JkA+B+ | VEGF        | -0.01 (-0.06 -0.04)  | 0.691 | 0.915 | FALSE |
| Kidd | JkA-B+ | VEGF        | -0.00 (-0.06 -0.05)  | 0.922 | 0.915 | FALSE |
| Kidd | JkA+B+ | X6CKINE     | -0.05 (-0.08 --0.02) | 0.001 | 0.002 | FALSE |
| Kidd | JkA-B+ | X6CKINE     | -0.02 (-0.05 -0.02)  | 0.355 | 0.002 | FALSE |
| Aub  | AuA-B+ | ADIPONECTIN | -0.01 (-0.06 -0.05)  | 0.853 | 0.473 | FALSE |
| Aub  | AuA+B+ | ADIPONECTIN | -0.02 (-0.05 -0.01)  | 0.222 | 0.473 | FALSE |
| Aub  | AuA-B+ | ADIPSIN     | -0.01 (-0.04 -0.02)  | 0.462 | 0.757 | FALSE |
| Aub  | AuA+B+ | ADIPSIN     | -0.00 (-0.02 -0.02)  | 0.753 | 0.757 | FALSE |
| Aub  | AuA-B+ | AMYLIN      | 0.00 (-0.14 -0.15)   | 0.963 | 0.449 | FALSE |
| Aub  | AuA+B+ | AMYLIN      | -0.05 (-0.13 -0.03)  | 0.224 | 0.449 | FALSE |
| Aub  | AuA-B+ | BCA 1       | 0.01 (-0.02 -0.04)   | 0.511 | 0.413 | FALSE |
| Aub  | AuA+B+ | BCA 1       | 0.01 (-0.01 -0.03)   | 0.201 | 0.413 | FALSE |
| Aub  | AuA-B+ | C PEPTIDE   | -0.02 (-0.10 -0.07)  | 0.658 | 0.774 | FALSE |
| Aub  | AuA+B+ | C PEPTIDE   | 0.01 (-0.03 -0.05)   | 0.641 | 0.774 | FALSE |
| Aub  | AuA-B+ | CCL19 MIP3B | 0.00 (-0.03 -0.04)   | 0.775 | 0.447 | FALSE |
| Aub  | AuA+B+ | CCL19 MIP3B | 0.01 (-0.01 -0.03)   | 0.204 | 0.447 | FALSE |
| Aub  | AuA-B+ | CCL20 MIP3A | 0.01 (-0.05 -0.07)   | 0.811 | 0.251 | FALSE |
| Aub  | AuA+B+ | CCL20 MIP3A | -0.02 (-0.05 -0.01)  | 0.123 | 0.251 | FALSE |
| Aub  | AuA-B+ | CRP         | 0.06 (0.00 -0.12)    | 0.035 | 0.108 | FALSE |
| Aub  | AuA+B+ | CRP         | 0.01 (-0.03 -0.04)   | 0.725 | 0.108 | FALSE |
| Aub  | AuA-B+ | CTACK       | -0.00 (-0.02 -0.01)  | 0.677 | 0.439 | FALSE |

|     |        |                  |                      |       |       |       |
|-----|--------|------------------|----------------------|-------|-------|-------|
| Aub | AuA+B+ | CTACK            | 0.01 (-0.00 - 0.02)  | 0.282 | 0.439 | FALSE |
| Aub | AuA-B+ | CXCL11   TAC     | -0.03 (-0.07 - 0.01) | 0.206 | 0.281 | FALSE |
| Aub | AuA+B+ | CXCL11   TAC     | 0.01 (-0.01 - 0.03)  | 0.487 | 0.281 | FALSE |
| Aub | AuA-B+ | CXCL6 GCP2       | 0.01 (-0.02 - 0.04)  | 0.480 | 0.125 | FALSE |
| Aub | AuA+B+ | CXCL6 GCP2       | 0.01 (0.00 - 0.03)   | 0.043 | 0.125 | FALSE |
| Aub | AuA-B+ | CXCL9 MIG        | -0.02 (-0.05 - 0.02) | 0.323 | 0.516 | FALSE |
| Aub | AuA+B+ | CXCL9 MIG        | -0.01 (-0.03 - 0.01) | 0.410 | 0.516 | FALSE |
| Aub | AuA-B+ | EGF              | -0.01 (-0.08 - 0.05) | 0.676 | 0.023 | FALSE |
| Aub | AuA+B+ | EGF              | 0.04 (0.01 - 0.08)   | 0.011 | 0.023 | FALSE |
| Aub | AuA-B+ | ENA 78           | 0.01 (-0.02 - 0.04)  | 0.566 | 0.767 | FALSE |
| Aub | AuA+B+ | ENA 78           | 0.00 (-0.01 - 0.02)  | 0.575 | 0.767 | FALSE |
| Aub | AuA-B+ | EOTAXIN 2        | 0.02 (-0.02 - 0.06)  | 0.307 | 0.508 | FALSE |
| Aub | AuA+B+ | EOTAXIN 2        | -0.00 (-0.03 - 0.02) | 0.752 | 0.508 | FALSE |
| Aub | AuA-B+ | EOTAXIN          | 0.02 (-0.00 - 0.05)  | 0.100 | 0.259 | FALSE |
| Aub | AuA+B+ | EOTAXIN          | 0.00 (-0.01 - 0.02)  | 0.696 | 0.259 | FALSE |
| Aub | AuA-B+ | G CSF            | -0.03 (-0.08 - 0.02) | 0.204 | 0.392 | FALSE |
| Aub | AuA+B+ | G CSF            | -0.01 (-0.04 - 0.01) | 0.408 | 0.392 | FALSE |
| Aub | AuA-B+ | GIP              | 0.02 (-0.09 - 0.13)  | 0.673 | 0.823 | FALSE |
| Aub | AuA+B+ | GIP              | -0.01 (-0.07 - 0.05) | 0.750 | 0.823 | FALSE |
| Aub | AuA-B+ | GRO              | 0.01 (-0.01 - 0.04)  | 0.182 | 0.380 | FALSE |
| Aub | AuA+B+ | GRO              | 0.00 (-0.01 - 0.02)  | 0.459 | 0.380 | FALSE |
| Aub | AuA-B+ | IL 13            | -0.15 (-1.18 - 0.88) | 0.772 | 0.229 | FALSE |
| Aub | AuA+B+ | IL 13            | -0.33 (-0.73 - 0.06) | 0.101 | 0.229 | FALSE |
| Aub | AuA-B+ | IL 16            | -0.02 (-0.09 - 0.06) | 0.650 | 0.860 | FALSE |
| Aub | AuA+B+ | IL 16            | 0.00 (-0.04 - 0.05)  | 0.854 | 0.860 | FALSE |
| Aub | AuA-B+ | IL 17            | -0.02 (-0.19 - 0.15) | 0.859 | 0.904 | FALSE |
| Aub | AuA+B+ | IL 17            | 0.02 (-0.09 - 0.12)  | 0.730 | 0.904 | FALSE |
| Aub | AuA-B+ | IL 23            | -0.12 (-1.60 - 1.36) | 0.870 | 0.885 | FALSE |
| Aub | AuA+B+ | IL 23            | 0.14 (-0.45 - 0.73)  | 0.647 | 0.885 | FALSE |
| Aub | AuA-B+ | IL 8             | -0.00 (-0.05 - 0.05) | 0.942 | 0.457 | FALSE |
| Aub | AuA+B+ | IL 8             | 0.02 (-0.01 - 0.04)  | 0.231 | 0.457 | FALSE |
| Aub | AuA-B+ | INSULIN          | -0.00 (-0.10 - 0.09) | 0.955 | 0.867 | FALSE |
| Aub | AuA+B+ | INSULIN          | -0.01 (-0.07 - 0.04) | 0.597 | 0.867 | FALSE |
| Aub | AuA-B+ | IP 10            | -0.02 (-0.04 - 0.01) | 0.200 | 0.385 | FALSE |
| Aub | AuA+B+ | IP 10            | -0.01 (-0.02 - 0.01) | 0.417 | 0.385 | FALSE |
| Aub | AuA-B+ | LEPTIN           | -0.06 (-0.16 - 0.05) | 0.302 | 0.316 | FALSE |
| Aub | AuA+B+ | LEPTIN           | 0.02 (-0.03 - 0.08)  | 0.399 | 0.316 | FALSE |
| Aub | AuA-B+ | LIPOCALIN 2 NGAL | -0.03 (-0.13 - 0.07) | 0.585 | 0.772 | FALSE |
| Aub | AuA+B+ | LIPOCALIN 2 NGAL | 0.01 (-0.03 - 0.04)  | 0.701 | 0.772 | FALSE |
| Aub | AuA-B+ | MCP 1            | 0.00 (-0.02 - 0.03)  | 0.687 | 0.793 | FALSE |
| Aub | AuA+B+ | MCP 1            | 0.00 (-0.01 - 0.01)  | 0.526 | 0.793 | FALSE |
| Aub | AuA-B+ | MCP 2            | 0.01 (-0.03 - 0.04)  | 0.592 | 0.797 | FALSE |
| Aub | AuA+B+ | MCP 2            | 0.00 (-0.01 - 0.02)  | 0.599 | 0.797 | FALSE |
| Aub | AuA-B+ | MCP 4            | -0.01 (-0.07 - 0.04) | 0.572 | 0.830 | FALSE |
| Aub | AuA+B+ | MCP 4            | -0.00 (-0.03 - 0.02) | 0.730 | 0.830 | FALSE |
| Aub | AuA-B+ | MDC              | 0.01 (-0.01 - 0.03)  | 0.590 | 0.864 | FALSE |
| Aub | AuA+B+ | MDC              | 0.00 (-0.01 - 0.01)  | 0.857 | 0.864 | FALSE |
| Aub | AuA-B+ | MIP 1B           | -0.01 (-0.06 - 0.03) | 0.617 | 0.740 | FALSE |
| Aub | AuA+B+ | MIP 1B           | -0.01 (-0.03 - 0.01) | 0.495 | 0.740 | FALSE |
| Aub | AuA-B+ | MIP 1D           | -0.02 (-0.06 - 0.01) | 0.202 | 0.395 | FALSE |
| Aub | AuA+B+ | MIP 1D           | -0.01 (-0.02 - 0.01) | 0.476 | 0.395 | FALSE |
| Aub | AuA-B+ | PAI 1            | -0.01 (-0.05 - 0.02) | 0.495 | 0.635 | FALSE |
| Aub | AuA+B+ | PAI 1            | 0.00 (-0.01 - 0.02)  | 0.610 | 0.635 | FALSE |
| Aub | AuA-B+ | PP               | 0.04 (-0.07 - 0.16)  | 0.470 | 0.158 | FALSE |
| Aub | AuA+B+ | PP               | 0.06 (-0.00 - 0.12)  | 0.056 | 0.158 | FALSE |
| Aub | AuA-B+ | RESISTIN         | -0.01 (-0.06 - 0.04) | 0.693 | 0.262 | FALSE |
| Aub | AuA+B+ | RESISTIN         | 0.02 (-0.01 - 0.04)  | 0.140 | 0.262 | FALSE |
| Aub | AuA-B+ | SAA              | 0.02 (-0.05 - 0.08)  | 0.556 | 0.397 | FALSE |
| Aub | AuA+B+ | SAA              | -0.02 (-0.05 - 0.02) | 0.291 | 0.397 | FALSE |

|       |        |              |                       |       |       |       |
|-------|--------|--------------|-----------------------|-------|-------|-------|
| Aub   | AuA-B+ | SAP          | 0.01 (-0.01 - 0.03)   | 0.325 | 0.396 | FALSE |
| Aub   | AuA-B+ | SAP          | -0.00 (-0.02 - 0.01)  | 0.532 | 0.396 | FALSE |
| Aub   | AuA-B+ | SDF 1A B     | -0.00 (-0.03 - 0.02)  | 0.843 | 0.980 | FALSE |
| Aub   | AuA-B+ | SDF 1A B     | -0.00 (-0.01 - 0.01)  | 0.989 | 0.980 | FALSE |
| Aub   | AuA-B+ | SEGFR        | -0.00 (-0.01 - 0.01)  | 0.950 | 0.898 | FALSE |
| Aub   | AuA-B+ | SEGFR        | 0.00 (-0.01 - 0.01)   | 0.662 | 0.898 | FALSE |
| Aub   | AuA-B+ | SGP130       | -0.00 (-0.02 - 0.01)  | 0.520 | 0.788 | FALSE |
| Aub   | AuA-B+ | SGP130       | 0.00 (-0.01 - 0.01)   | 0.927 | 0.788 | FALSE |
| Aub   | AuA-B+ | SIL4R        | -0.02 (-0.05 - -0.00) | 0.033 | 0.048 | FALSE |
| Aub   | AuA-B+ | SIL4R        | 0.00 (-0.01 - 0.02)   | 0.479 | 0.048 | FALSE |
| Aub   | AuA-B+ | SIL6R        | -0.00 (-0.02 - 0.02)  | 0.998 | 0.945 | FALSE |
| Aub   | AuA-B+ | SIL6R        | -0.00 (-0.01 - 0.01)  | 0.742 | 0.945 | FALSE |
| Aub   | AuA-B+ | SILRII       | -0.02 (-0.04 - 0.01)  | 0.179 | 0.405 | FALSE |
| Aub   | AuA-B+ | SILRII       | -0.00 (-0.01 - 0.01)  | 0.814 | 0.405 | FALSE |
| Aub   | AuA-B+ | STNFRI       | 0.01 (-0.01 - 0.03)   | 0.527 | 0.819 | FALSE |
| Aub   | AuA-B+ | STNFRI       | 0.00 (-0.01 - 0.01)   | 0.879 | 0.819 | FALSE |
| Aub   | AuA-B+ | STNFR II     | 0.00 (-0.02 - 0.02)   | 0.884 | 0.672 | FALSE |
| Aub   | AuA-B+ | STNFR II     | 0.00 (-0.01 - 0.01)   | 0.373 | 0.672 | FALSE |
| Aub   | AuA-B+ | SVEGFR2      | -0.01 (-0.02 - 0.01)  | 0.362 | 0.290 | FALSE |
| Aub   | AuA-B+ | SVEGFR2      | -0.01 (-0.02 - 0.00)  | 0.143 | 0.290 | FALSE |
| Aub   | AuA-B+ | SVEGFR3      | -0.00 (-0.04 - 0.04)  | 0.964 | 0.483 | FALSE |
| Aub   | AuA-B+ | SVEGFR3      | -0.01 (-0.04 - 0.01)  | 0.237 | 0.483 | FALSE |
| Aub   | AuA-B+ | TARC         | 0.01 (-0.02 - 0.05)   | 0.446 | 0.581 | FALSE |
| Aub   | AuA-B+ | TARC         | 0.01 (-0.01 - 0.03)   | 0.381 | 0.581 | FALSE |
| Aub   | AuA-B+ | TGF A        | 0.02 (-0.04 - 0.09)   | 0.498 | 0.345 | FALSE |
| Aub   | AuA-B+ | TGF A        | 0.03 (-0.01 - 0.06)   | 0.154 | 0.345 | FALSE |
| Aub   | AuA-B+ | TGF B1       | -0.00 (-0.08 - 0.08)  | 0.994 | 0.651 | FALSE |
| Aub   | AuA-B+ | TGF B1       | -0.02 (-0.05 - 0.02)  | 0.363 | 0.651 | FALSE |
| Aub   | AuA-B+ | TNFA         | 0.01 (-0.02 - 0.04)   | 0.412 | 0.685 | FALSE |
| Aub   | AuA-B+ | TNFA         | -0.00 (-0.02 - 0.01)  | 0.950 | 0.685 | FALSE |
| Aub   | AuA-B+ | TPO          | -0.03 (-0.12 - 0.06)  | 0.518 | 0.080 | FALSE |
| Aub   | AuA-B+ | TPO          | 0.05 (-0.00 - 0.10)   | 0.055 | 0.080 | FALSE |
| Aub   | AuA-B+ | TRAIL        | -0.03 (-0.06 - 0.01)  | 0.142 | 0.293 | FALSE |
| Aub   | AuA-B+ | TRAIL        | -0.01 (-0.02 - 0.01)  | 0.396 | 0.293 | FALSE |
| Aub   | AuA-B+ | VEGF         | 0.05 (-0.03 - 0.14)   | 0.245 | 0.327 | FALSE |
| Aub   | AuA-B+ | VEGF         | 0.03 (-0.02 - 0.07)   | 0.238 | 0.327 | FALSE |
| Aub   | AuA-B+ | X6CKINE      | 0.00 (-0.05 - 0.06)   | 0.895 | 0.784 | FALSE |
| Aub   | AuA-B+ | X6CKINE      | -0.01 (-0.04 - 0.02)  | 0.523 | 0.784 | FALSE |
| Duffy | FYA-B+ | ADIPONECTIN  | -0.03 (-0.07 - 0.01)  | 0.201 | 0.321 | FALSE |
| Duffy | FYA-B+ | ADIPONECTIN  | -0.01 (-0.05 - 0.04)  | 0.783 | 0.321 | FALSE |
| Duffy | FYA-B+ | ADIPSIN      | -0.01 (-0.03 - 0.01)  | 0.360 | 0.446 | FALSE |
| Duffy | FYA-B+ | ADIPSIN      | 0.00 (-0.02 - 0.02)   | 0.982 | 0.446 | FALSE |
| Duffy | FYA-B+ | AMYLIN       | -0.08 (-0.18 - 0.02)  | 0.113 | 0.244 | FALSE |
| Duffy | FYA-B+ | AMYLIN       | -0.03 (-0.14 - 0.07)  | 0.558 | 0.244 | FALSE |
| Duffy | FYA-B+ | BCA 1        | -0.01 (-0.03 - 0.01)  | 0.442 | 0.544 | FALSE |
| Duffy | FYA-B+ | BCA 1        | -0.01 (-0.03 - 0.01)  | 0.271 | 0.544 | FALSE |
| Duffy | FYA-B+ | C PEPTIDE    | -0.01 (-0.06 - 0.04)  | 0.776 | 0.802 | FALSE |
| Duffy | FYA-B+ | C PEPTIDE    | 0.01 (-0.05 - 0.06)   | 0.793 | 0.802 | FALSE |
| Duffy | FYA-B+ | CCL19 MIP3B  | -0.01 (-0.03 - 0.01)  | 0.383 | 0.351 | FALSE |
| Duffy | FYA-B+ | CCL19 MIP3B  | -0.02 (-0.04 - 0.01)  | 0.149 | 0.351 | FALSE |
| Duffy | FYA-B+ | CCL20 MIP3A  | -0.02 (-0.06 - 0.02)  | 0.375 | 0.661 | FALSE |
| Duffy | FYA-B+ | CCL20 MIP3A  | -0.02 (-0.06 - 0.03)  | 0.463 | 0.661 | FALSE |
| Duffy | FYA-B+ | CRP          | -0.01 (-0.05 - 0.03)  | 0.605 | 0.872 | FALSE |
| Duffy | FYA-B+ | CRP          | -0.01 (-0.05 - 0.04)  | 0.704 | 0.872 | FALSE |
| Duffy | FYA-B+ | CTACK        | -0.01 (-0.02 - 0.00)  | 0.143 | 0.235 | FALSE |
| Duffy | FYA-B+ | CTACK        | -0.00 (-0.01 - 0.01)  | 0.864 | 0.235 | FALSE |
| Duffy | FYA-B+ | CXCL11 I TAC | 0.01 (-0.01 - 0.04)   | 0.277 | 0.008 | FALSE |
| Duffy | FYA-B+ | CXCL11 I TAC | 0.04 (0.01 - 0.07)    | 0.003 | 0.008 | FALSE |
| Duffy | FYA-B+ | CXCL6 GCP2   | 0.04 (0.02 - 0.06)    | 0.000 | 0.000 | TRUE  |

|       |        |                  |                       |       |       |       |
|-------|--------|------------------|-----------------------|-------|-------|-------|
| Duffy | FYA-B+ | CXCL6 GCP2       | 0.09 (0.07 - 0.11)    | 0.000 | 0.000 | TRUE  |
| Duffy | FYA+B+ | CXCL9 MIG        | 0.00 (-0.02 - 0.03)   | 0.800 | 0.859 | FALSE |
| Duffy | FYA-B+ | CXCL9 MIG        | -0.00 (-0.03 - 0.02)  | 0.826 | 0.859 | FALSE |
| Duffy | FYA+B+ | EGF              | -0.03 (-0.07 - 0.01)  | 0.185 | 0.373 | FALSE |
| Duffy | FYA-B+ | EGF              | -0.03 (-0.07 - 0.02)  | 0.234 | 0.373 | FALSE |
| Duffy | FYA+B+ | ENA 78           | 0.02 (-0.00 - 0.04)   | 0.054 | 0.000 | TRUE  |
| Duffy | FYA-B+ | ENA 78           | 0.10 (0.08 - 0.13)    | 0.000 | 0.000 | TRUE  |
| Duffy | FYA+B+ | EOTAXIN 2        | -0.01 (-0.04 - 0.02)  | 0.555 | 0.029 | FALSE |
| Duffy | FYA-B+ | EOTAXIN 2        | 0.02 (-0.00 - 0.05)   | 0.104 | 0.029 | FALSE |
| Duffy | FYA+B+ | EOTAXIN          | 0.08 (0.06 - 0.10)    | 0.000 | 0.000 | TRUE  |
| Duffy | FYA-B+ | EOTAXIN          | 0.17 (0.15 - 0.19)    | 0.000 | 0.000 | TRUE  |
| Duffy | FYA+B+ | G CSF            | 0.01 (-0.02 - 0.04)   | 0.543 | 0.157 | FALSE |
| Duffy | FYA-B+ | G CSF            | -0.02 (-0.05 - 0.02)  | 0.294 | 0.157 | FALSE |
| Duffy | FYA+B+ | GIP              | -0.02 (-0.09 - 0.06)  | 0.675 | 0.791 | FALSE |
| Duffy | FYA-B+ | GIP              | 0.00 (-0.08 - 0.09)   | 0.914 | 0.791 | FALSE |
| Duffy | FYA+B+ | GRO              | 0.03 (0.01 - 0.04)    | 0.000 | 0.000 | TRUE  |
| Duffy | FYA-B+ | GRO              | 0.09 (0.07 - 0.10)    | 0.000 | 0.000 | TRUE  |
| Duffy | FYA+B+ | IL 13            | -0.99 (-1.79 - -0.19) | 0.015 | 0.112 | FALSE |
| Duffy | FYA-B+ | IL 13            | -0.45 (-0.92 - 0.03)  | 0.064 | 0.112 | FALSE |
| Duffy | FYA+B+ | IL 16            | 0.02 (-0.04 - 0.07)   | 0.564 | 0.646 | FALSE |
| Duffy | FYA-B+ | IL 16            | -0.01 (-0.06 - 0.05)  | 0.836 | 0.646 | FALSE |
| Duffy | FYA+B+ | IL 17            | -0.16 (-0.29 - -0.02) | 0.022 | 0.074 | FALSE |
| Duffy | FYA-B+ | IL 17            | -0.12 (-0.26 - 0.03)  | 0.119 | 0.074 | FALSE |
| Duffy | FYA+B+ | IL 23            | 0.96 (0.48 - 1.43)    | 0.000 | 0.001 | FALSE |
| Duffy | FYA-B+ | IL 23            | 0.34 (-0.36 - 1.04)   | 0.344 | 0.001 | FALSE |
| Duffy | FYA+B+ | IL 8             | 0.04 (0.01 - 0.08)    | 0.010 | 0.000 | FALSE |
| Duffy | FYA-B+ | IL 8             | 0.07 (0.04 - 0.11)    | 0.000 | 0.000 | FALSE |
| Duffy | FYA+B+ | INSULIN          | -0.04 (-0.11 - 0.02)  | 0.187 | 0.418 | FALSE |
| Duffy | FYA-B+ | INSULIN          | -0.03 (-0.10 - 0.04)  | 0.388 | 0.418 | FALSE |
| Duffy | FYA+B+ | IP 10            | -0.01 (-0.03 - 0.01)  | 0.326 | 0.617 | FALSE |
| Duffy | FYA-B+ | IP 10            | -0.01 (-0.03 - 0.01)  | 0.545 | 0.617 | FALSE |
| Duffy | FYA+B+ | LEPTIN           | -0.05 (-0.12 - 0.02)  | 0.152 | 0.252 | FALSE |
| Duffy | FYA-B+ | LEPTIN           | -0.01 (-0.08 - 0.06)  | 0.774 | 0.252 | FALSE |
| Duffy | FYA+B+ | LIPOCALIN 2 NGAL | -0.04 (-0.09 - 0.01)  | 0.088 | 0.054 | FALSE |
| Duffy | FYA-B+ | LIPOCALIN 2 NGAL | 0.01 (-0.03 - 0.05)   | 0.674 | 0.054 | FALSE |
| Duffy | FYA+B+ | MCP 1            | 0.08 (0.07 - 0.10)    | 0.000 | 0.000 | TRUE  |
| Duffy | FYA-B+ | MCP 1            | 0.17 (0.15 - 0.18)    | 0.000 | 0.000 | TRUE  |
| Duffy | FYA+B+ | MCP 2            | -0.04 (-0.06 - -0.01) | 0.001 | 0.001 | FALSE |
| Duffy | FYA-B+ | MCP 2            | -0.04 (-0.07 - -0.02) | 0.001 | 0.001 | FALSE |
| Duffy | FYA+B+ | MCP 4            | 0.09 (0.06 - 0.12)    | 0.000 | 0.000 | TRUE  |
| Duffy | FYA-B+ | MCP 4            | 0.21 (0.18 - 0.24)    | 0.000 | 0.000 | TRUE  |
| Duffy | FYA+B+ | MDC              | 0.01 (-0.00 - 0.02)   | 0.143 | 0.212 | FALSE |
| Duffy | FYA-B+ | MDC              | 0.00 (-0.02 - 0.02)   | 0.923 | 0.212 | FALSE |
| Duffy | FYA+B+ | MIP 1B           | 0.02 (-0.01 - 0.04)   | 0.220 | 0.121 | FALSE |
| Duffy | FYA-B+ | MIP 1B           | 0.03 (0.00 - 0.06)    | 0.040 | 0.121 | FALSE |
| Duffy | FYA+B+ | MIP 1D           | 0.00 (-0.02 - 0.02)   | 0.720 | 0.206 | FALSE |
| Duffy | FYA-B+ | MIP 1D           | 0.02 (-0.00 - 0.04)   | 0.120 | 0.206 | FALSE |
| Duffy | FYA+B+ | PAI 1            | -0.01 (-0.03 - -0.01) | 0.316 | 0.482 | FALSE |
| Duffy | FYA-B+ | PAI 1            | -0.00 (-0.02 - 0.02)  | 0.937 | 0.482 | FALSE |
| Duffy | FYA+B+ | PP               | 0.02 (-0.06 - 0.10)   | 0.634 | 0.875 | FALSE |
| Duffy | FYA-B+ | PP               | 0.02 (-0.07 - 0.11)   | 0.634 | 0.875 | FALSE |
| Duffy | FYA+B+ | RESISTIN         | -0.01 (-0.04 - 0.03)  | 0.717 | 0.039 | FALSE |
| Duffy | FYA-B+ | RESISTIN         | 0.03 (-0.01 - 0.06)   | 0.100 | 0.039 | FALSE |
| Duffy | FYA+B+ | SAA              | -0.04 (-0.08 - 0.01)  | 0.082 | 0.196 | FALSE |
| Duffy | FYA-B+ | SAA              | -0.04 (-0.09 - 0.01)  | 0.129 | 0.196 | FALSE |
| Duffy | FYA+B+ | SAP              | -0.01 (-0.02 - 0.01)  | 0.344 | 0.350 | FALSE |
| Duffy | FYA-B+ | SAP              | -0.01 (-0.02 - 0.00)  | 0.149 | 0.350 | FALSE |
| Duffy | FYA+B+ | SDF 1A B         | -0.00 (-0.02 - 0.01)  | 0.875 | 0.286 | FALSE |
| Duffy | FYA-B+ | SDF 1A B         | 0.01 (-0.01 - 0.03)   | 0.266 | 0.286 | FALSE |

|       |        |              |                     |       |       |       |
|-------|--------|--------------|---------------------|-------|-------|-------|
| Duffy | FYA+B+ | SEGFR        | -0.00 (-0.01 -0.01) | 0.827 | 0.923 | FALSE |
| Duffy | FYA-B+ | SEGFR        | -0.00 (-0.01 -0.01) | 0.691 | 0.923 | FALSE |
| Duffy | FYA+B+ | SGP130       | 0.00 (-0.01 -0.01)  | 0.905 | 0.984 | FALSE |
| Duffy | FYA-B+ | SGP130       | -0.00 (-0.01 -0.01) | 0.982 | 0.984 | FALSE |
| Duffy | FYA+B+ | SIL4R        | 0.01 (-0.01 -0.02)  | 0.471 | 0.060 | FALSE |
| Duffy | FYA-B+ | SIL4R        | 0.02 (0.00 -0.03)   | 0.027 | 0.060 | FALSE |
| Duffy | FYA+B+ | SIL6R        | 0.00 (-0.01 -0.01)  | 0.585 | 0.675 | FALSE |
| Duffy | FYA-B+ | SIL6R        | 0.01 (-0.01 -0.02)  | 0.376 | 0.675 | FALSE |
| Duffy | FYA+B+ | SILRII       | -0.00 (-0.02 -0.01) | 0.812 | 0.934 | FALSE |
| Duffy | FYA-B+ | SILRII       | -0.00 (-0.02 -0.01) | 0.712 | 0.934 | FALSE |
| Duffy | FYA+B+ | STNFRI       | 0.00 (-0.01 -0.01)  | 0.935 | 0.924 | FALSE |
| Duffy | FYA-B+ | STNFRI       | -0.00 (-0.02 -0.01) | 0.816 | 0.924 | FALSE |
| Duffy | FYA+B+ | STNFRII      | 0.00 (-0.01 -0.01)  | 0.999 | 0.891 | FALSE |
| Duffy | FYA-B+ | STNFRII      | -0.00 (-0.02 -0.01) | 0.720 | 0.891 | FALSE |
| Duffy | FYA+B+ | SVEGFR2      | 0.00 (-0.01 -0.01)  | 0.650 | 0.901 | FALSE |
| Duffy | FYA-B+ | SVEGFR2      | 0.00 (-0.01 -0.01)  | 0.822 | 0.901 | FALSE |
| Duffy | FYA+B+ | SVEGFR3      | 0.03 (-0.00 -0.05)  | 0.082 | 0.211 | FALSE |
| Duffy | FYA-B+ | SVEGFR3      | 0.02 (-0.01 -0.05)  | 0.191 | 0.211 | FALSE |
| Duffy | FYA+B+ | TARC         | 0.03 (0.01 -0.05)   | 0.008 | 0.000 | TRUE  |
| Duffy | FYA-B+ | TARC         | 0.07 (0.05 -0.10)   | 0.000 | 0.000 | TRUE  |
| Duffy | FYA+B+ | TGF A        | 0.01 (-0.03 -0.06)  | 0.624 | 0.424 | FALSE |
| Duffy | FYA-B+ | TGF A        | -0.01 (-0.06 -0.03) | 0.546 | 0.424 | FALSE |
| Duffy | FYA+B+ | TGF B1       | -0.01 (-0.06 -0.04) | 0.710 | 0.927 | FALSE |
| Duffy | FYA-B+ | TGF B1       | -0.01 (-0.06 -0.04) | 0.740 | 0.927 | FALSE |
| Duffy | FYA+B+ | TNFA         | 0.00 (-0.02 -0.02)  | 0.951 | 0.997 | FALSE |
| Duffy | FYA-B+ | TNFA         | 0.00 (-0.02 -0.02)  | 0.994 | 0.997 | FALSE |
| Duffy | FYA+B+ | TPO          | -0.05 (-0.11 -0.02) | 0.168 | 0.078 | FALSE |
| Duffy | FYA-B+ | TPO          | -0.08 (-0.15 -0.01) | 0.024 | 0.078 | FALSE |
| Duffy | FYA+B+ | TRAIL        | -0.01 (-0.03 -0.01) | 0.326 | 0.464 | FALSE |
| Duffy | FYA-B+ | TRAIL        | -0.01 (-0.04 -0.01) | 0.229 | 0.464 | FALSE |
| Duffy | FYA+B+ | VEGF         | 0.02 (-0.04 -0.07)  | 0.534 | 0.443 | FALSE |
| Duffy | FYA-B+ | VEGF         | -0.01 (-0.07 -0.05) | 0.657 | 0.443 | FALSE |
| Duffy | FYA+B+ | X6CKINE      | -0.01 (-0.04 -0.03) | 0.691 | 0.491 | FALSE |
| Duffy | FYA-B+ | X6CKINE      | 0.01 (-0.03 -0.05)  | 0.571 | 0.491 | FALSE |
| Lewis | LeA+   | ADIPONECTIN  | 0.00 (-0.04 -0.04)  | 0.967 | 0.967 | FALSE |
| Lewis | LeA+   | ADIPSIN      | 0.03 (0.00 -0.05)   | 0.032 | 0.032 | FALSE |
| Lewis | LeA+   | AMYLIN       | 0.03 (-0.06 -0.13)  | 0.495 | 0.495 | FALSE |
| Lewis | LeA+   | BCA 1        | 0.01 (-0.01 -0.03)  | 0.530 | 0.530 | FALSE |
| Lewis | LeA+   | C PEPTIDE    | 0.01 (-0.04 -0.06)  | 0.651 | 0.651 | FALSE |
| Lewis | LeA+   | CCL19 MIP3B  | 0.02 (-0.01 -0.04)  | 0.143 | 0.144 | FALSE |
| Lewis | LeA+   | CCL20 MIP3A  | -0.00 (-0.04 -0.04) | 0.993 | 0.993 | FALSE |
| Lewis | LeA+   | CRP          | 0.03 (-0.01 -0.08)  | 0.148 | 0.148 | FALSE |
| Lewis | LeA+   | CTACK        | 0.02 (0.01 -0.03)   | 0.001 | 0.001 | FALSE |
| Lewis | LeA+   | CXCL11 I TAC | -0.01 (-0.04 -0.01) | 0.385 | 0.385 | FALSE |
| Lewis | LeA+   | CXCL6 GCP2   | -0.01 (-0.03 -0.01) | 0.202 | 0.202 | FALSE |
| Lewis | LeA+   | CXCL9 MIG    | 0.02 (0.00 -0.05)   | 0.038 | 0.038 | FALSE |
| Lewis | LeA+   | EGF          | -0.01 (-0.05 -0.03) | 0.567 | 0.567 | FALSE |
| Lewis | LeA+   | ENA 78       | -0.02 (-0.04 -0.01) | 0.181 | 0.181 | FALSE |
| Lewis | LeA+   | EOTAXIN 2    | 0.00 (-0.03 -0.03)  | 0.904 | 0.904 | FALSE |
| Lewis | LeA+   | EOTAXIN      | -0.00 (-0.02 -0.02) | 0.898 | 0.898 | FALSE |
| Lewis | LeA+   | G CSF        | -0.02 (-0.06 -0.01) | 0.134 | 0.134 | FALSE |
| Lewis | LeA+   | GIP          | -0.05 (-0.12 -0.02) | 0.190 | 0.191 | FALSE |
| Lewis | LeA+   | GRO          | -0.00 (-0.02 -0.02) | 0.947 | 0.947 | FALSE |
| Lewis | LeA+   | IL 13        | 0.61 (-0.13 -1.34)  | 0.104 | 0.155 | FALSE |
| Lewis | LeA+   | IL 16        | -0.02 (-0.07 -0.03) | 0.388 | 0.388 | FALSE |
| Lewis | LeA+   | IL 17        | 0.04 (-0.11 -0.20)  | 0.578 | 0.578 | FALSE |
| Lewis | LeA+   | IL 23        | -0.16 (-0.70 -0.37) | 0.553 | 0.561 | FALSE |
| Lewis | LeA+   | IL 8         | -0.00 (-0.04 -0.03) | 0.891 | 0.891 | FALSE |
| Lewis | LeA+   | INSULIN      | 0.01 (-0.06 -0.08)  | 0.805 | 0.805 | FALSE |



|       |      |                  |                      |       |       |       |
|-------|------|------------------|----------------------|-------|-------|-------|
| Lewis | LeA+ | IP 10            | -0.00 (-0.02 -0.02)  | 0.695 | 0.695 | FALSE |
| Lewis | LeA+ | LEPTIN           | 0.01 (-0.06 -0.08)   | 0.774 | 0.775 | FALSE |
| Lewis | LeA+ | LIPOCALIN 2 NGAL | 0.05 (0.00 -0.09)    | 0.030 | 0.030 | FALSE |
| Lewis | LeA+ | MCP 1            | -0.00 (-0.02 -0.01)  | 0.755 | 0.755 | FALSE |
| Lewis | LeA+ | MCP 2            | -0.02 (-0.04 -0.01)  | 0.182 | 0.182 | FALSE |
| Lewis | LeA+ | MCP 4            | -0.02 (-0.05 -0.02)  | 0.340 | 0.340 | FALSE |
| Lewis | LeA+ | MDC              | 0.01 (-0.01 -0.03)   | 0.183 | 0.183 | FALSE |
| Lewis | LeA+ | MIP 1B           | -0.00 (-0.03 -0.02)  | 0.810 | 0.810 | FALSE |
| Lewis | LeA+ | MIP 1D           | -0.01 (-0.03 -0.01)  | 0.252 | 0.252 | FALSE |
| Lewis | LeA+ | PAI 1            | 0.02 (-0.01 -0.04)   | 0.240 | 0.241 | FALSE |
| Lewis | LeA+ | PP               | -0.09 (-0.17 --0.01) | 0.028 | 0.028 | FALSE |
| Lewis | LeA+ | RESISTIN         | 0.04 (0.01 -0.07)    | 0.011 | 0.011 | FALSE |
| Lewis | LeA+ | SAA              | 0.02 (-0.03 -0.07)   | 0.374 | 0.374 | FALSE |
| Lewis | LeA+ | SAP              | 0.01 (-0.01 -0.02)   | 0.219 | 0.219 | FALSE |
| Lewis | LeA+ | SDF 1A B         | 0.00 (-0.01 -0.02)   | 0.898 | 0.898 | FALSE |
| Lewis | LeA+ | SEGFR            | 0.00 (-0.01 -0.01)   | 0.617 | 0.617 | FALSE |
| Lewis | LeA+ | SGP130           | 0.01 (0.00 -0.02)    | 0.027 | 0.027 | FALSE |
| Lewis | LeA+ | SIL4R            | 0.00 (-0.01 -0.01)   | 0.859 | 0.859 | FALSE |
| Lewis | LeA+ | SIL6R            | 0.01 (-0.01 -0.02)   | 0.404 | 0.404 | FALSE |
| Lewis | LeA+ | SILRII           | 0.01 (-0.01 -0.02)   | 0.318 | 0.318 | FALSE |
| Lewis | LeA+ | STNFRI           | -0.00 (-0.02 -0.01)  | 0.743 | 0.743 | FALSE |
| Lewis | LeA+ | STNFRII          | 0.01 (-0.01 -0.02)   | 0.346 | 0.346 | FALSE |
| Lewis | LeA+ | SVEGFR2          | 0.00 (-0.01 -0.01)   | 0.717 | 0.717 | FALSE |
| Lewis | LeA+ | SVEGFR3          | 0.03 (-0.00 -0.06)   | 0.071 | 0.071 | FALSE |
| Lewis | LeA+ | TARC             | -0.00 (-0.03 -0.02)  | 0.875 | 0.875 | FALSE |
| Lewis | LeA+ | TGF A            | 0.02 (-0.03 -0.06)   | 0.474 | 0.474 | FALSE |
| Lewis | LeA+ | TGF B1           | 0.03 (-0.02 -0.09)   | 0.242 | 0.242 | FALSE |
| Lewis | LeA+ | TNFA             | 0.01 (-0.01 -0.03)   | 0.447 | 0.447 | FALSE |
| Lewis | LeA+ | TPO              | -0.03 (-0.10 -0.03)  | 0.315 | 0.315 | FALSE |
| Lewis | LeA+ | TRAIL            | 0.01 (-0.01 -0.03)   | 0.458 | 0.458 | FALSE |
| Lewis | LeA+ | VEGF             | 0.00 (-0.05 -0.06)   | 0.934 | 0.934 | FALSE |
| Lewis | LeA+ | X6CKINE          | 0.01 (-0.02 -0.04)   | 0.580 | 0.580 | FALSE |
| ABO   | A    | ADIPONECTIN      | 0.02 (-0.01 -0.05)   | 0.143 | 0.039 | FALSE |
| ABO   | AB   | ADIPONECTIN      | -0.05 (-0.12 -0.02)  | 0.197 | 0.039 | FALSE |
| ABO   | B    | ADIPONECTIN      | -0.03 (-0.07 -0.01)  | 0.176 | 0.039 | FALSE |
| ABO   | A    | ADIPSIN          | -0.01 (-0.02 -0.01)  | 0.587 | 0.718 | FALSE |
| ABO   | AB   | ADIPSIN          | -0.02 (-0.06 -0.03)  | 0.424 | 0.718 | FALSE |
| ABO   | B    | ADIPSIN          | 0.01 (-0.02 -0.03)   | 0.676 | 0.718 | FALSE |
| ABO   | A    | AMYLIN           | -0.09 (-0.16 --0.01) | 0.033 | 0.121 | FALSE |
| ABO   | AB   | AMYLIN           | -0.14 (-0.32 -0.03)  | 0.111 | 0.121 | FALSE |
| ABO   | B    | AMYLIN           | -0.07 (-0.19 -0.05)  | 0.265 | 0.121 | FALSE |
| ABO   | A    | BCA 1            | -0.01 (-0.03 -0.00)  | 0.124 | 0.088 | FALSE |
| ABO   | AB   | BCA 1            | 0.03 (-0.01 -0.07)   | 0.097 | 0.088 | FALSE |
| ABO   | B    | BCA 1            | -0.00 (-0.03 -0.02)  | 0.885 | 0.088 | FALSE |
| ABO   | A    | C PEPTIDE        | -0.00 (-0.04 -0.04)  | 0.953 | 0.951 | FALSE |
| ABO   | AB   | C PEPTIDE        | 0.00 (-0.09 -0.09)   | 0.959 | 0.951 | FALSE |
| ABO   | B    | C PEPTIDE        | -0.02 (-0.07 -0.04)  | 0.580 | 0.951 | FALSE |
| ABO   | A    | CCL19 MIP3B      | 0.00 (-0.02 -0.02)   | 0.958 | 0.090 | FALSE |
| ABO   | AB   | CCL19 MIP3B      | 0.04 (0.00 -0.07)    | 0.034 | 0.090 | FALSE |
| ABO   | B    | CCL19 MIP3B      | 0.02 (-0.01 -0.04)   | 0.149 | 0.090 | FALSE |
| ABO   | A    | CCL20 MIP3A      | -0.04 (-0.07 --0.01) | 0.007 | 0.053 | FALSE |
| ABO   | AB   | CCL20 MIP3A      | -0.03 (-0.10 -0.03)  | 0.294 | 0.053 | FALSE |
| ABO   | B    | CCL20 MIP3A      | -0.01 (-0.06 -0.03)  | 0.561 | 0.053 | FALSE |
| ABO   | A    | CRP              | 0.01 (-0.02 -0.05)   | 0.424 | 0.290 | FALSE |
| ABO   | AB   | CRP              | 0.06 (-0.01 -0.13)   | 0.096 | 0.290 | FALSE |
| ABO   | B    | CRP              | 0.03 (-0.02 -0.08)   | 0.200 | 0.290 | FALSE |
| ABO   | A    | CTACK            | -0.01 (-0.02 -0.00)  | 0.231 | 0.208 | FALSE |
| ABO   | AB   | CTACK            | 0.01 (-0.01 -0.02)   | 0.554 | 0.208 | FALSE |
| ABO   | B    | CTACK            | -0.01 (-0.03 -0.00)  | 0.084 | 0.208 | FALSE |

|     |    |                  |                       |       |       |       |
|-----|----|------------------|-----------------------|-------|-------|-------|
| ABO | A  | CXCL11   TAC     | -0.02 (-0.04 - -0.00) | 0.042 | 0.002 | FALSE |
| ABO | AB | CXCL11   TAC     | 0.05 (0.01 - 0.09)    | 0.025 | 0.002 | FALSE |
| ABO | B  | CXCL11   TAC     | 0.02 (-0.01 - 0.05)   | 0.235 | 0.002 | FALSE |
| ABO | A  | CXCL6 GCP2       | -0.00 (-0.02 - 0.01)  | 0.514 | 0.172 | FALSE |
| ABO | AB | CXCL6 GCP2       | 0.01 (-0.02 - 0.04)   | 0.374 | 0.172 | FALSE |
| ABO | B  | CXCL6 GCP2       | 0.02 (-0.00 - 0.04)   | 0.116 | 0.172 | FALSE |
| ABO | A  | CXCL9 MIG        | -0.02 (-0.04 - 0.00)  | 0.073 | 0.048 | FALSE |
| ABO | AB | CXCL9 MIG        | 0.01 (-0.03 - 0.05)   | 0.475 | 0.048 | FALSE |
| ABO | B  | CXCL9 MIG        | 0.02 (-0.01 - 0.04)   | 0.282 | 0.048 | FALSE |
| ABO | A  | EGF              | 0.04 (0.01 - 0.07)    | 0.024 | 0.075 | FALSE |
| ABO | AB | EGF              | 0.07 (-0.01 - 0.14)   | 0.069 | 0.075 | FALSE |
| ABO | B  | EGF              | 0.01 (-0.04 - 0.06)   | 0.571 | 0.075 | FALSE |
| ABO | A  | ENA 78           | 0.00 (-0.01 - 0.02)   | 0.754 | 0.916 | FALSE |
| ABO | AB | ENA 78           | 0.01 (-0.03 - 0.04)   | 0.695 | 0.916 | FALSE |
| ABO | B  | ENA 78           | 0.01 (-0.02 - 0.03)   | 0.513 | 0.916 | FALSE |
| ABO | A  | EOTAXIN 2        | 0.01 (-0.01 - 0.03)   | 0.507 | 0.181 | FALSE |
| ABO | AB | EOTAXIN 2        | 0.02 (-0.03 - 0.07)   | 0.409 | 0.181 | FALSE |
| ABO | B  | EOTAXIN 2        | -0.03 (-0.06 - 0.01)  | 0.118 | 0.181 | FALSE |
| ABO | A  | EOTAXIN          | -0.01 (-0.02 - 0.01)  | 0.431 | 0.467 | FALSE |
| ABO | AB | EOTAXIN          | -0.01 (-0.05 - 0.02)  | 0.421 | 0.467 | FALSE |
| ABO | B  | EOTAXIN          | 0.01 (-0.01 - 0.03)   | 0.413 | 0.467 | FALSE |
| ABO | A  | G CSF            | 0.02 (-0.00 - 0.05)   | 0.076 | 0.082 | FALSE |
| ABO | AB | G CSF            | 0.06 (-0.00 - 0.11)   | 0.055 | 0.082 | FALSE |
| ABO | B  | G CSF            | -0.00 (-0.04 - 0.03)  | 0.844 | 0.082 | FALSE |
| ABO | A  | GIP              | -0.02 (-0.08 - 0.04)  | 0.502 | 0.752 | FALSE |
| ABO | AB | GIP              | -0.06 (-0.21 - 0.09)  | 0.404 | 0.752 | FALSE |
| ABO | B  | GIP              | 0.01 (-0.08 - 0.10)   | 0.859 | 0.752 | FALSE |
| ABO | A  | GRO              | 0.00 (-0.01 - 0.01)   | 0.645 | 0.298 | FALSE |
| ABO | AB | GRO              | 0.01 (-0.02 - 0.04)   | 0.445 | 0.298 | FALSE |
| ABO | B  | GRO              | 0.02 (-0.00 - 0.03)   | 0.068 | 0.298 | FALSE |
| ABO | A  | IL 13            | 0.19 (-0.16 - 0.54)   | 0.280 | 0.027 | FALSE |
| ABO | AB | IL 13            | 0.79 (0.28 - 1.29)    | 0.002 | 0.027 | FALSE |
| ABO | B  | IL 13            | -0.10 (-0.83 - 0.64)  | 0.796 | 0.027 | FALSE |
| ABO | A  | IL 16            | 0.01 (-0.03 - 0.05)   | 0.603 | 0.026 | FALSE |
| ABO | AB | IL 16            | 0.12 (0.03 - 0.21)    | 0.009 | 0.026 | FALSE |
| ABO | B  | IL 16            | -0.03 (-0.10 - 0.03)  | 0.274 | 0.026 | FALSE |
| ABO | A  | IL 17            | 0.00 (-0.11 - 0.11)   | 0.997 | 0.926 | FALSE |
| ABO | AB | IL 17            | 0.05 (-0.16 - 0.27)   | 0.629 | 0.926 | FALSE |
| ABO | B  | IL 17            | -0.03 (-0.19 - 0.13)  | 0.704 | 0.926 | FALSE |
| ABO | A  | IL 23            | 0.26 (-0.26 - 0.78)   | 0.326 | 0.439 | FALSE |
| ABO | AB | IL 23            | 0.39 (-0.41 - 1.19)   | 0.334 | 0.439 | FALSE |
| ABO | B  | IL 23            | 0.75 (-0.34 - 1.85)   | 0.178 | 0.439 | FALSE |
| ABO | A  | IL 8             | -0.02 (-0.05 - 0.00)  | 0.074 | 0.169 | FALSE |
| ABO | AB | IL 8             | 0.01 (-0.05 - 0.06)   | 0.795 | 0.169 | FALSE |
| ABO | B  | IL 8             | 0.01 (-0.03 - 0.05)   | 0.676 | 0.169 | FALSE |
| ABO | A  | INSULIN          | -0.03 (-0.08 - 0.02)  | 0.250 | 0.660 | FALSE |
| ABO | AB | INSULIN          | -0.03 (-0.16 - 0.11)  | 0.704 | 0.660 | FALSE |
| ABO | B  | INSULIN          | -0.04 (-0.12 - 0.05)  | 0.379 | 0.660 | FALSE |
| ABO | A  | IP 10            | -0.01 (-0.02 - 0.01)  | 0.372 | 0.123 | FALSE |
| ABO | AB | IP 10            | 0.03 (-0.00 - 0.06)   | 0.086 | 0.123 | FALSE |
| ABO | B  | IP 10            | 0.01 (-0.01 - 0.03)   | 0.444 | 0.123 | FALSE |
| ABO | A  | LEPTIN           | -0.00 (-0.06 - 0.06)  | 0.991 | 0.063 | FALSE |
| ABO | AB | LEPTIN           | 0.13 (0.01 - 0.25)    | 0.030 | 0.063 | FALSE |
| ABO | B  | LEPTIN           | -0.04 (-0.12 - 0.03)  | 0.236 | 0.063 | FALSE |
| ABO | A  | LIPOCALIN 2 NGAL | -0.00 (-0.04 - 0.03)  | 0.833 | 0.554 | FALSE |
| ABO | AB | LIPOCALIN 2 NGAL | -0.08 (-0.18 - 0.03)  | 0.148 | 0.554 | FALSE |
| ABO | B  | LIPOCALIN 2 NGAL | -0.00 (-0.06 - 0.06)  | 0.921 | 0.554 | FALSE |
| ABO | A  | MCP 1            | 0.01 (-0.00 - 0.02)   | 0.062 | 0.112 | FALSE |
| ABO | AB | MCP 1            | 0.01 (-0.02 - 0.04)   | 0.402 | 0.112 | FALSE |

|     |    |          |                      |       |       |       |
|-----|----|----------|----------------------|-------|-------|-------|
| ABO | B  | MCP 1    | 0.02 (0.00 -0.03)    | 0.029 | 0.112 | FALSE |
| ABO | A  | MCP 2    | -0.01 (-0.02 -0.01)  | 0.582 | 0.219 | FALSE |
| ABO | AB | MCP 2    | 0.03 (-0.00 -0.07)   | 0.073 | 0.219 | FALSE |
| ABO | B  | MCP 2    | 0.00 (-0.03 -0.03)   | 0.873 | 0.219 | FALSE |
| ABO | A  | MCP 4    | 0.01 (-0.02 -0.03)   | 0.496 | 0.093 | FALSE |
| ABO | AB | MCP 4    | 0.06 (0.01 -0.11)    | 0.015 | 0.093 | FALSE |
| ABO | B  | MCP 4    | 0.02 (-0.02 -0.06)   | 0.277 | 0.093 | FALSE |
| ABO | A  | MDC      | 0.01 (-0.01 -0.02)   | 0.374 | 0.700 | FALSE |
| ABO | AB | MDC      | -0.01 (-0.04 -0.03)  | 0.748 | 0.700 | FALSE |
| ABO | B  | MDC      | -0.00 (-0.02 -0.01)  | 0.746 | 0.700 | FALSE |
| ABO | A  | MIP 1B   | 0.00 (-0.02 -0.02)   | 0.870 | 0.699 | FALSE |
| ABO | AB | MIP 1B   | 0.02 (-0.02 -0.06)   | 0.275 | 0.699 | FALSE |
| ABO | B  | MIP 1B   | -0.00 (-0.04 -0.03)  | 0.786 | 0.699 | FALSE |
| ABO | A  | MIP 1D   | -0.02 (-0.04 --0.01) | 0.008 | 0.027 | FALSE |
| ABO | AB | MIP 1D   | -0.02 (-0.06 -0.02)  | 0.377 | 0.027 | FALSE |
| ABO | B  | MIP 1D   | 0.01 (-0.02 -0.03)   | 0.564 | 0.027 | FALSE |
| ABO | A  | PAI 1    | -0.00 (-0.02 -0.01)  | 0.620 | 0.606 | FALSE |
| ABO | AB | PAI 1    | -0.01 (-0.06 -0.04)  | 0.764 | 0.606 | FALSE |
| ABO | B  | PAI 1    | 0.01 (-0.01 -0.04)   | 0.320 | 0.606 | FALSE |
| ABO | A  | PP       | 0.05 (-0.01 -0.12)   | 0.090 | 0.394 | FALSE |
| ABO | AB | PP       | 0.05 (-0.10 -0.21)   | 0.518 | 0.394 | FALSE |
| ABO | B  | PP       | 0.03 (-0.07 -0.12)   | 0.578 | 0.394 | FALSE |
| ABO | A  | RESISTIN | 0.00 (-0.02 -0.03)   | 0.860 | 0.844 | FALSE |
| ABO | AB | RESISTIN | -0.03 (-0.09 -0.04)  | 0.418 | 0.844 | FALSE |
| ABO | B  | RESISTIN | -0.00 (-0.04 -0.03)  | 0.826 | 0.844 | FALSE |
| ABO | A  | SAA      | 0.00 (-0.03 -0.04)   | 0.821 | 0.944 | FALSE |
| ABO | AB | SAA      | 0.02 (-0.05 -0.09)   | 0.593 | 0.944 | FALSE |
| ABO | B  | SAA      | -0.00 (-0.05 -0.04)  | 0.898 | 0.944 | FALSE |
| ABO | A  | SAP      | 0.00 (-0.01 -0.01)   | 0.958 | 0.160 | FALSE |
| ABO | AB | SAP      | 0.02 (0.00 -0.05)    | 0.031 | 0.160 | FALSE |
| ABO | B  | SAP      | -0.00 (-0.02 -0.02)  | 0.932 | 0.160 | FALSE |
| ABO | A  | SDF 1A B | 0.01 (-0.00 -0.02)   | 0.238 | 0.114 | FALSE |
| ABO | AB | SDF 1A B | 0.03 (0.00 -0.05)    | 0.028 | 0.114 | FALSE |
| ABO | B  | SDF 1A B | 0.01 (-0.01 -0.03)   | 0.162 | 0.114 | FALSE |
| ABO | A  | SEGFR    | 0.00 (-0.01 -0.01)   | 0.713 | 0.204 | FALSE |
| ABO | AB | SEGFR    | 0.01 (-0.00 -0.03)   | 0.091 | 0.204 | FALSE |
| ABO | B  | SEGFR    | 0.01 (-0.00 -0.02)   | 0.137 | 0.204 | FALSE |
| ABO | A  | SGP130   | -0.02 (-0.03 --0.01) | 0.000 | 0.000 | TRUE  |
| ABO | AB | SGP130   | -0.00 (-0.02 -0.02)  | 0.945 | 0.000 | TRUE  |
| ABO | B  | SGP130   | 0.01 (0.00 -0.02)    | 0.032 | 0.000 | TRUE  |
| ABO | A  | SIL4R    | 0.00 (-0.01 -0.02)   | 0.645 | 0.580 | FALSE |
| ABO | AB | SIL4R    | 0.00 (-0.03 -0.03)   | 0.885 | 0.580 | FALSE |
| ABO | B  | SIL4R    | 0.01 (-0.00 -0.03)   | 0.162 | 0.580 | FALSE |
| ABO | A  | SIL6R    | 0.00 (-0.01 -0.01)   | 0.417 | 0.509 | FALSE |
| ABO | AB | SIL6R    | 0.01 (-0.01 -0.03)   | 0.443 | 0.509 | FALSE |
| ABO | B  | SIL6R    | -0.00 (-0.02 -0.01)  | 0.471 | 0.509 | FALSE |
| ABO | A  | SILRII   | 0.01 (-0.01 -0.02)   | 0.264 | 0.683 | FALSE |
| ABO | AB | SILRII   | -0.00 (-0.03 -0.03)  | 0.948 | 0.683 | FALSE |
| ABO | B  | SILRII   | 0.01 (-0.01 -0.02)   | 0.439 | 0.683 | FALSE |
| ABO | A  | STNFRI   | 0.01 (-0.01 -0.02)   | 0.305 | 0.076 | FALSE |
| ABO | AB | STNFRI   | 0.03 (0.01 -0.06)    | 0.010 | 0.076 | FALSE |
| ABO | B  | STNFRI   | 0.00 (-0.01 -0.02)   | 0.679 | 0.076 | FALSE |
| ABO | A  | STNFR II | -0.00 (-0.01 -0.01)  | 0.372 | 0.147 | FALSE |
| ABO | AB | STNFR II | 0.02 (-0.01 -0.04)   | 0.208 | 0.147 | FALSE |
| ABO | B  | STNFR II | -0.01 (-0.03 -0.00)  | 0.097 | 0.147 | FALSE |
| ABO | A  | SVEGFR2  | -0.04 (-0.05 --0.03) | 0.000 | 0.000 | TRUE  |
| ABO | AB | SVEGFR2  | -0.03 (-0.05 --0.01) | 0.006 | 0.000 | TRUE  |
| ABO | B  | SVEGFR2  | 0.00 (-0.01 -0.02)   | 0.708 | 0.000 | TRUE  |
| ABO | A  | SVEGFR3  | -0.08 (-0.10 --0.05) | 0.000 | 0.000 | TRUE  |

|     |    |         |                     |       |       |       |
|-----|----|---------|---------------------|-------|-------|-------|
| ABO | AB | SVEGFR3 | -0.03 (-0.07 -0.02) | 0.304 | 0.000 | TRUE  |
| ABO | B  | SVEGFR3 | 0.03 (-0.00 -0.07)  | 0.068 | 0.000 | TRUE  |
| ABO | A  | TARC    | -0.01 (-0.03 -0.01) | 0.255 | 0.185 | FALSE |
| ABO | AB | TARC    | 0.02 (-0.02 -0.05)  | 0.371 | 0.185 | FALSE |
| ABO | B  | TARC    | -0.03 (-0.06 -0.01) | 0.109 | 0.185 | FALSE |
| ABO | A  | TGF A   | 0.03 (-0.00 -0.07)  | 0.089 | 0.118 | FALSE |
| ABO | AB | TGF A   | 0.05 (-0.03 -0.12)  | 0.210 | 0.118 | FALSE |
| ABO | B  | TGF A   | -0.02 (-0.07 -0.04) | 0.496 | 0.118 | FALSE |
| ABO | A  | TGF B1  | -0.01 (-0.05 -0.03) | 0.675 | 0.215 | FALSE |
| ABO | AB | TGF B1  | 0.05 (-0.01 -0.11)  | 0.092 | 0.215 | FALSE |
| ABO | B  | TGF B1  | 0.02 (-0.03 -0.07)  | 0.415 | 0.215 | FALSE |
| ABO | A  | TNFA    | -0.00 (-0.02 -0.01) | 0.616 | 0.066 | FALSE |
| ABO | AB | TNFA    | 0.04 (0.01 -0.06)   | 0.019 | 0.066 | FALSE |
| ABO | B  | TNFA    | 0.00 (-0.02 -0.03)  | 0.900 | 0.066 | FALSE |
| ABO | A  | TPO     | 0.03 (-0.02 -0.09)  | 0.190 | 0.329 | FALSE |
| ABO | AB | TPO     | 0.05 (-0.06 -0.16)  | 0.374 | 0.329 | FALSE |
| ABO | B  | TPO     | -0.02 (-0.10 -0.05) | 0.555 | 0.329 | FALSE |
| ABO | A  | TRAIL   | -0.02 (-0.03 -0.00) | 0.093 | 0.179 | FALSE |
| ABO | AB | TRAIL   | 0.01 (-0.02 -0.04)  | 0.444 | 0.179 | FALSE |
| ABO | B  | TRAIL   | 0.00 (-0.02 -0.03)  | 0.863 | 0.179 | FALSE |
| ABO | A  | VEGF    | -0.01 (-0.06 -0.03) | 0.550 | 0.929 | FALSE |
| ABO | AB | VEGF    | -0.01 (-0.10 -0.08) | 0.818 | 0.929 | FALSE |
| ABO | B  | VEGF    | -0.02 (-0.08 -0.05) | 0.621 | 0.929 | FALSE |
| ABO | A  | X6CKINE | 0.02 (-0.00 -0.05)  | 0.100 | 0.024 | FALSE |
| ABO | AB | X6CKINE | 0.08 (0.02 -0.13)   | 0.004 | 0.024 | FALSE |
| ABO | B  | X6CKINE | 0.00 (-0.04 -0.04)  | 0.832 | 0.024 | FALSE |

Supplementary Table 5

| Blood Group | Allele | Marker           | Estimate (95% CI)     | P-value | Wald Joint P-value | Bonferroni Significant? |
|-------------|--------|------------------|-----------------------|---------|--------------------|-------------------------|
| Lewis       | Null   | ADIPONECTIN      | -0.03 (-0.13 - 0.07)  | 0.576   | 0.201              | FALSE                   |
| Lewis       | Null   | ADIPSIN          | 0.02 (-0.01 - 0.06)   | 0.217   | 0.394              | FALSE                   |
| Lewis       | Null   | AMYLIN           | 0.28 (-0.22 - 0.79)   | 0.265   | 0.464              | FALSE                   |
| Lewis       | Null   | BCA 1            | -0.00 (-0.06 - 0.05)  | 0.895   | 0.206              | FALSE                   |
| Lewis       | Null   | C PEPTIDE        | 0.07 (-0.10 - 0.24)   | 0.425   | 0.633              | FALSE                   |
| Lewis       | Null   | CCL19 MIP3B      | 0.01 (-0.05 - 0.06)   | 0.807   | 0.819              | FALSE                   |
| Lewis       | Null   | CCL20 MIP3A      | 0.04 (-0.10 - 0.17)   | 0.574   | 0.559              | FALSE                   |
| Lewis       | Null   | CRP              | 0.04 (-0.06 - 0.14)   | 0.445   | 0.622              | FALSE                   |
| Lewis       | Null   | CTACK            | -0.03 (-0.06 - -0.00) | 0.044   | 0.000              | TRUE                    |
| Lewis       | Null   | CXCL11 I TAC     | 0.04 (-0.02 - 0.11)   | 0.216   | 0.438              | FALSE                   |
| Lewis       | Null   | CXCL6 GCP2       | -0.04 (-0.10 - 0.02)  | 0.154   | 0.001              | FALSE                   |
| Lewis       | Null   | CXCL9 MIG        | 0.02 (-0.02 - 0.07)   | 0.321   | 0.312              | FALSE                   |
| Lewis       | Null   | EGF              | -0.02 (-0.16 - 0.12)  | 0.804   | 0.739              | FALSE                   |
| Lewis       | Null   | ENA 78           | -0.04 (-0.11 - 0.04)  | 0.339   | 0.607              | FALSE                   |
| Lewis       | Null   | EOTAXIN 2        | 0.01 (-0.07 - 0.10)   | 0.752   | 0.811              | FALSE                   |
| Lewis       | Null   | EOTAXIN          | -0.01 (-0.06 - 0.04)  | 0.650   | 0.379              | FALSE                   |
| Lewis       | Null   | G CSF            | 0.03 (-0.09 - 0.14)   | 0.666   | 0.441              | FALSE                   |
| Lewis       | Null   | GIP              | 0.00 (-0.22 - 0.22)   | 0.999   | 0.967              | FALSE                   |
| Lewis       | Null   | GRO              | -0.00 (-0.04 - 0.04)  | 0.985   | 0.043              | FALSE                   |
| Lewis       | Null   | IL 16            | -0.21 (-0.41 - -0.02) | 0.032   | 0.086              | FALSE                   |
| Lewis       | Null   | IL 17            | 0.33 (-0.08 - 0.75)   | 0.114   | 0.046              | FALSE                   |
| Lewis       | Null   | IL 8             | -0.03 (-0.19 - 0.13)  | 0.705   | 0.449              | FALSE                   |
| Lewis       | Null   | INSULIN          | 0.27 (-0.08 - 0.61)   | 0.129   | 0.300              | FALSE                   |
| Lewis       | Null   | IP 10            | 0.03 (-0.02 - 0.07)   | 0.199   | 0.054              | FALSE                   |
| Lewis       | Null   | LEPTIN           | -0.06 (-0.39 - 0.26)  | 0.697   | 0.578              | FALSE                   |
| Lewis       | Null   | LIPOCALIN 2 NGAL | 0.02 (-0.05 - 0.08)   | 0.588   | 0.477              | FALSE                   |
| Lewis       | Null   | MCP 1            | 0.02 (-0.02 - 0.07)   | 0.343   | 0.381              | FALSE                   |
| Lewis       | Null   | MCP 2            | -0.02 (-0.07 - 0.03)  | 0.514   | 0.549              | FALSE                   |
| Lewis       | Null   | MCP 4            | 0.02 (-0.07 - 0.10)   | 0.732   | 0.928              | FALSE                   |
| Lewis       | Null   | MDC              | 0.00 (-0.04 - 0.05)   | 0.900   | 0.773              | FALSE                   |
| Lewis       | Null   | MIP 1B           | 0.02 (-0.09 - 0.12)   | 0.744   | 0.497              | FALSE                   |
| Lewis       | Null   | MIP 1D           | 0.01 (-0.04 - 0.06)   | 0.835   | 0.579              | FALSE                   |
| Lewis       | Null   | PAI 1            | 0.01 (-0.06 - 0.08)   | 0.763   | 0.820              | FALSE                   |
| Lewis       | Null   | PP               | -0.15 (-0.33 - 0.03)  | 0.109   | 0.277              | FALSE                   |
| Lewis       | Null   | RESISTIN         | 0.02 (-0.03 - 0.08)   | 0.447   | 0.640              | FALSE                   |
| Lewis       | Null   | SAA              | -0.02 (-0.13 - 0.09)  | 0.686   | 0.332              | FALSE                   |
| Lewis       | Null   | SAP              | -0.03 (-0.07 - 0.01)  | 0.119   | 0.295              | FALSE                   |
| Lewis       | Null   | SDF 1A B         | 0.01 (-0.06 - 0.08)   | 0.878   | 0.599              | FALSE                   |
| Lewis       | Null   | SEGFR            | -0.00 (-0.03 - 0.02)  | 0.754   | 0.704              | FALSE                   |
| Lewis       | Null   | SGP130           | -0.00 (-0.03 - 0.02)  | 0.678   | 0.797              | FALSE                   |
| Lewis       | Null   | SIL4R            | 0.02 (-0.08 - 0.12)   | 0.706   | 0.222              | FALSE                   |
| Lewis       | Null   | SIL6R            | 0.02 (-0.01 - 0.04)   | 0.212   | 0.282              | FALSE                   |
| Lewis       | Null   | SILRII           | -0.01 (-0.05 - 0.02)  | 0.399   | 0.387              | FALSE                   |
| Lewis       | Null   | STNFR I          | 0.03 (-0.00 - 0.07)   | 0.058   | 0.153              | FALSE                   |
| Lewis       | Null   | STNFR II         | 0.01 (-0.03 - 0.05)   | 0.593   | 0.845              | FALSE                   |
| Lewis       | Null   | SVEGFR2          | 0.01 (-0.02 - 0.04)   | 0.373   | 0.344              | FALSE                   |
| Lewis       | Null   | SVEGFR3          | -0.04 (-0.11 - 0.04)  | 0.313   | 0.578              | FALSE                   |
| Lewis       | Null   | TARC             | -0.02 (-0.10 - 0.07)  | 0.683   | 0.102              | FALSE                   |
| Lewis       | Null   | TGF A            | 0.15 (0.00 - 0.29)    | 0.048   | 0.013              | FALSE                   |
| Lewis       | Null   | TGF B1           | -0.01 (-0.03 - 0.01)  | 0.316   | 0.198              | FALSE                   |
| Lewis       | Null   | TNFA             | 0.03 (-0.02 - 0.09)   | 0.205   | 0.113              | FALSE                   |
| Lewis       | Null   | TPO              | 0.09 (-0.10 - 0.27)   | 0.363   | 0.346              | FALSE                   |
| Lewis       | Null   | TRAIL            | -0.02 (-0.09 - 0.06)  | 0.606   | 0.461              | FALSE                   |

|          |          |                  |                      |       |       |       |
|----------|----------|------------------|----------------------|-------|-------|-------|
| Lewis    | Null     | VEGF             | 0.08 (-0.09 -0.26)   | 0.341 | 0.626 | FALSE |
| Lewis    | Null     | X6CKINE          | 0.05 (-0.05 -0.14)   | 0.365 | 0.596 | FALSE |
| Secretor | Secretor | ADIPONECTIN      | 0.00 (-0.02 -0.03)   | 0.791 | 0.791 | FALSE |
| Secretor | Secretor | ADIPSIN          | -0.00 (-0.02 -0.01)  | 0.772 | 0.772 | FALSE |
| Secretor | Secretor | AMYLIN           | 0.00 (-0.06 -0.06)   | 0.992 | 0.992 | FALSE |
| Secretor | Secretor | BCA 1            | -0.00 (-0.01 -0.01)  | 0.731 | 0.732 | FALSE |
| Secretor | Secretor | C PEPTIDE        | -0.01 (-0.03 -0.02)  | 0.626 | 0.626 | FALSE |
| Secretor | Secretor | CCL19 MIP3B      | 0.00 (-0.01 -0.01)   | 0.862 | 0.862 | FALSE |
| Secretor | Secretor | CCL20 MIP3A      | -0.00 (-0.02 -0.02)  | 0.839 | 0.839 | FALSE |
| Secretor | Secretor | CRP              | -0.03 (-0.06 --0.01) | 0.008 | 0.008 | FALSE |
| Secretor | Secretor | CTACK            | -0.01 (-0.01 --0.00) | 0.046 | 0.046 | FALSE |
| Secretor | Secretor | CXCL11 I TAC     | 0.00 (-0.01 -0.02)   | 0.605 | 0.605 | FALSE |
| Secretor | Secretor | CXCL6 GCP2       | 0.01 (0.00 -0.02)    | 0.006 | 0.006 | FALSE |
| Secretor | Secretor | CXCL9 MIG        | -0.01 (-0.02 -0.01)  | 0.306 | 0.306 | FALSE |
| Secretor | Secretor | EGF              | -0.00 (-0.03 -0.02)  | 0.713 | 0.713 | FALSE |
| Secretor | Secretor | ENA 78           | 0.01 (0.00 -0.03)    | 0.032 | 0.032 | FALSE |
| Secretor | Secretor | EOTAXIN 2        | -0.01 (-0.02 -0.01)  | 0.457 | 0.457 | FALSE |
| Secretor | Secretor | EOTAXIN          | 0.00 (-0.01 -0.01)   | 0.563 | 0.563 | FALSE |
| Secretor | Secretor | G CSF            | 0.01 (-0.01 -0.03)   | 0.196 | 0.196 | FALSE |
| Secretor | Secretor | GIP              | 0.02 (-0.02 -0.06)   | 0.397 | 0.397 | FALSE |
| Secretor | Secretor | GRO              | 0.00 (-0.00 -0.01)   | 0.310 | 0.310 | FALSE |
| Secretor | Secretor | IL 13            | -0.29 (-0.78 -0.20)  | 0.241 | 0.286 | FALSE |
| Secretor | Secretor | IL 16            | 0.01 (-0.02 -0.04)   | 0.550 | 0.550 | FALSE |
| Secretor | Secretor | IL 17            | -0.05 (-0.14 -0.03)  | 0.234 | 0.234 | FALSE |
| Secretor | Secretor | IL 23            | 0.18 (-0.15 -0.51)   | 0.283 | 0.298 | FALSE |
| Secretor | Secretor | IL 8             | 0.01 (-0.01 -0.03)   | 0.252 | 0.252 | FALSE |
| Secretor | Secretor | INSULIN          | -0.01 (-0.05 -0.03)  | 0.617 | 0.617 | FALSE |
| Secretor | Secretor | IP 10            | 0.01 (-0.01 -0.02)   | 0.332 | 0.332 | FALSE |
| Secretor | Secretor | LEPTIN           | -0.02 (-0.06 -0.01)  | 0.204 | 0.204 | FALSE |
| Secretor | Secretor | LIPOCALIN 2 NGAL | -0.01 (-0.03 -0.02)  | 0.642 | 0.642 | FALSE |
| Secretor | Secretor | MCP 1            | 0.00 (-0.00 -0.01)   | 0.325 | 0.325 | FALSE |
| Secretor | Secretor | MCP 2            | 0.01 (-0.01 -0.02)   | 0.428 | 0.428 | FALSE |
| Secretor | Secretor | MCP 4            | 0.02 (0.00 -0.04)    | 0.042 | 0.042 | FALSE |
| Secretor | Secretor | MDC              | -0.01 (-0.02 -0.00)  | 0.054 | 0.054 | FALSE |
| Secretor | Secretor | MIP 1B           | 0.01 (-0.01 -0.02)   | 0.308 | 0.308 | FALSE |
| Secretor | Secretor | MIP 1D           | 0.00 (-0.01 -0.01)   | 0.660 | 0.660 | FALSE |
| Secretor | Secretor | PAI 1            | -0.00 (-0.02 -0.01)  | 0.825 | 0.825 | FALSE |
| Secretor | Secretor | PP               | 0.07 (0.02 -0.11)    | 0.004 | 0.004 | FALSE |
| Secretor | Secretor | RESISTIN         | -0.01 (-0.03 -0.01)  | 0.278 | 0.278 | FALSE |
| Secretor | Secretor | SAA              | -0.02 (-0.04 -0.01)  | 0.169 | 0.169 | FALSE |
| Secretor | Secretor | SAP              | -0.01 (-0.01 -0.00)  | 0.203 | 0.203 | FALSE |
| Secretor | Secretor | SDF 1A B         | 0.00 (-0.01 -0.01)   | 0.753 | 0.753 | FALSE |
| Secretor | Secretor | SEGFR            | -0.00 (-0.00 -0.00)  | 0.985 | 0.985 | FALSE |
| Secretor | Secretor | SGP130           | -0.00 (-0.01 -0.00)  | 0.208 | 0.208 | FALSE |
| Secretor | Secretor | SIL4R            | 0.00 (-0.01 -0.01)   | 0.964 | 0.964 | FALSE |
| Secretor | Secretor | SIL6R            | -0.00 (-0.01 -0.01)  | 0.863 | 0.863 | FALSE |
| Secretor | Secretor | SILRII           | 0.00 (-0.01 -0.01)   | 0.976 | 0.976 | FALSE |
| Secretor | Secretor | STNFRI           | 0.00 (-0.01 -0.01)   | 0.798 | 0.798 | FALSE |
| Secretor | Secretor | STNFRII          | -0.00 (-0.01 -0.00)  | 0.218 | 0.218 | FALSE |
| Secretor | Secretor | SVEGFR2          | 0.00 (-0.00 -0.01)   | 0.497 | 0.497 | FALSE |
| Secretor | Secretor | SVEGFR3          | -0.01 (-0.03 -0.00)  | 0.135 | 0.136 | FALSE |
| Secretor | Secretor | TARC             | 0.01 (-0.01 -0.02)   | 0.402 | 0.402 | FALSE |
| Secretor | Secretor | TGFA             | 0.00 (-0.03 -0.03)   | 0.980 | 0.980 | FALSE |
| Secretor | Secretor | TGF B1           | -0.01 (-0.04 -0.02)  | 0.468 | 0.468 | FALSE |

|          |          |                  |                      |       |       |       |
|----------|----------|------------------|----------------------|-------|-------|-------|
| Secretor | Secretor | TNFA             | -0.00 (-0.02 -0.01)  | 0.422 | 0.422 | FALSE |
| Secretor | Secretor | TPO              | 0.02 (-0.02 -0.06)   | 0.325 | 0.325 | FALSE |
| Secretor | Secretor | TRAIL            | -0.01 (-0.02 -0.01)  | 0.369 | 0.369 | FALSE |
| Secretor | Secretor | VEGF             | -0.01 (-0.04 -0.02)  | 0.651 | 0.651 | FALSE |
| Secretor | Secretor | X6CKINE          | -0.00 (-0.02 -0.02)  | 0.898 | 0.898 | FALSE |
| Kidd     | B        | ADIPONECTIN      | -0.01 (-0.04 -0.02)  | 0.602 | 0.523 | FALSE |
| Kidd     | B        | ADIPSIN          | 0.02 (-0.00 -0.04)   | 0.081 | 0.190 | FALSE |
| Kidd     | B        | AMYLIN           | -0.03 (-0.10 -0.04)  | 0.348 | 0.180 | FALSE |
| Kidd     | B        | BCA 1            | -0.00 (-0.02 -0.01)  | 0.646 | 0.376 | FALSE |
| Kidd     | B        | C PEPTIDE        | 0.00 (-0.03 -0.04)   | 0.855 | 0.678 | FALSE |
| Kidd     | B        | CCL19 MIP3B      | 0.01 (-0.00 -0.03)   | 0.172 | 0.379 | FALSE |
| Kidd     | B        | CCL20 MIP3A      | 0.02 (-0.01 -0.04)   | 0.245 | 0.135 | FALSE |
| Kidd     | B        | CRP              | 0.01 (-0.02 -0.04)   | 0.589 | 0.521 | FALSE |
| Kidd     | B        | CTACK            | -0.00 (-0.01 -0.01)  | 0.586 | 0.528 | FALSE |
| Kidd     | B        | CXCL11 I TAC     | 0.02 (-0.00 -0.04)   | 0.079 | 0.128 | FALSE |
| Kidd     | B        | CXCL6 GCP2       | -0.01 (-0.02 -0.01)  | 0.434 | 0.689 | FALSE |
| Kidd     | B        | CXCL9 MIG        | 0.02 (0.01 -0.04)    | 0.010 | 0.021 | FALSE |
| Kidd     | B        | EGF              | -0.03 (-0.06 -0.00)  | 0.053 | 0.153 | FALSE |
| Kidd     | B        | ENA 78           | -0.00 (-0.02 -0.02)  | 0.997 | 0.934 | FALSE |
| Kidd     | B        | EOTAXIN 2        | 0.01 (-0.01 -0.03)   | 0.237 | 0.443 | FALSE |
| Kidd     | B        | EOTAXIN          | -0.01 (-0.02 -0.00)  | 0.188 | 0.341 | FALSE |
| Kidd     | B        | G CSF            | 0.00 (-0.02 -0.03)   | 0.831 | 0.968 | FALSE |
| Kidd     | B        | GIP              | -0.02 (-0.07 -0.04)  | 0.557 | 0.829 | FALSE |
| Kidd     | B        | GRO              | -0.01 (-0.02 -0.00)  | 0.244 | 0.204 | FALSE |
| Kidd     | B        | IL 13            | 0.15 (-0.16 -0.46)   | 0.339 | 0.622 | FALSE |
| Kidd     | B        | IL 16            | -0.02 (-0.05 -0.02)  | 0.380 | 0.660 | FALSE |
| Kidd     | B        | IL 17            | -0.03 (-0.12 -0.07)  | 0.565 | 0.657 | FALSE |
| Kidd     | B        | IL 23            | -0.44 (-0.91 -0.03)  | 0.064 | 0.175 | FALSE |
| Kidd     | B        | IL 8             | 0.00 (-0.02 -0.02)   | 0.999 | 0.809 | FALSE |
| Kidd     | B        | INSULIN          | -0.02 (-0.06 -0.03)  | 0.535 | 0.367 | FALSE |
| Kidd     | B        | IP 10            | 0.01 (-0.00 -0.02)   | 0.154 | 0.358 | FALSE |
| Kidd     | B        | LEPTIN           | -0.02 (-0.08 -0.03)  | 0.429 | 0.683 | FALSE |
| Kidd     | B        | LIPOCALIN 2 NGAL | -0.01 (-0.04 -0.03)  | 0.755 | 0.947 | FALSE |
| Kidd     | B        | MCP 1            | -0.00 (-0.01 -0.01)  | 0.885 | 0.112 | FALSE |
| Kidd     | B        | MCP 2            | -0.02 (-0.04 --0.01) | 0.008 | 0.007 | FALSE |
| Kidd     | B        | MCP 4            | -0.01 (-0.04 -0.01)  | 0.199 | 0.383 | FALSE |
| Kidd     | B        | MDC              | -0.00 (-0.01 -0.01)  | 0.863 | 0.065 | FALSE |
| Kidd     | B        | MIP 1B           | 0.00 (-0.02 -0.02)   | 0.852 | 0.805 | FALSE |
| Kidd     | B        | MIP 1D           | -0.01 (-0.02 -0.01)  | 0.384 | 0.563 | FALSE |
| Kidd     | B        | PAI 1            | 0.02 (0.00 -0.04)    | 0.020 | 0.068 | FALSE |
| Kidd     | B        | PP               | 0.02 (-0.03 -0.08)   | 0.425 | 0.523 | FALSE |
| Kidd     | B        | RESISTIN         | -0.00 (-0.02 -0.02)  | 0.964 | 0.921 | FALSE |
| Kidd     | B        | SAA              | -0.00 (-0.03 -0.03)  | 0.913 | 0.984 | FALSE |
| Kidd     | B        | SAP              | 0.00 (-0.01 -0.01)   | 0.837 | 0.568 | FALSE |
| Kidd     | B        | SDF 1A B         | -0.01 (-0.02 --0.00) | 0.029 | 0.090 | FALSE |
| Kidd     | B        | SEGFR            | 0.00 (-0.00 -0.01)   | 0.404 | 0.665 | FALSE |
| Kidd     | B        | SGP130           | 0.00 (-0.00 -0.01)   | 0.291 | 0.336 | FALSE |
| Kidd     | B        | SIL4R            | 0.00 (-0.01 -0.02)   | 0.448 | 0.409 | FALSE |
| Kidd     | B        | SIL6R            | 0.00 (-0.00 -0.01)   | 0.377 | 0.641 | FALSE |
| Kidd     | B        | SILRII           | 0.01 (-0.00 -0.02)   | 0.260 | 0.059 | FALSE |
| Kidd     | B        | STNFRI           | -0.01 (-0.02 -0.00)  | 0.213 | 0.110 | FALSE |
| Kidd     | B        | STNFR II         | 0.00 (-0.01 -0.01)   | 0.980 | 0.096 | FALSE |
| Kidd     | B        | SVEGFR2          | 0.01 (0.00 -0.02)    | 0.046 | 0.112 | FALSE |
| Kidd     | B        | SVEGFR3          | -0.00 (-0.02 -0.02)  | 0.804 | 0.013 | FALSE |

|        |   |                  |                      |       |       |       |
|--------|---|------------------|----------------------|-------|-------|-------|
| Kidd   | B | TARC             | 0.00 (-0.02 -0.02)   | 0.814 | 0.581 | FALSE |
| Kidd   | B | TGFA             | 0.00 (-0.03 -0.04)   | 0.778 | 0.153 | FALSE |
| Kidd   | B | TGFB1            | 0.02 (-0.01 -0.05)   | 0.248 | 0.006 | FALSE |
| Kidd   | B | TNFA             | 0.00 (-0.01 -0.02)   | 0.500 | 0.795 | FALSE |
| Kidd   | B | TPO              | -0.01 (-0.06 -0.03)  | 0.532 | 0.503 | FALSE |
| Kidd   | B | TRAIL            | 0.01 (-0.01 -0.02)   | 0.361 | 0.420 | FALSE |
| Kidd   | B | VEGF             | -0.00 (-0.04 -0.04)  | 0.922 | 0.915 | FALSE |
| Kidd   | B | X6CKINE          | -0.01 (-0.04 -0.01)  | 0.355 | 0.002 | FALSE |
| Colton | B | ADIPONECTIN      | -0.02 (-0.05 -0.02)  | 0.427 | 0.428 | FALSE |
| Colton | B | ADIPSIN          | 0.01 (-0.01 -0.04)   | 0.278 | 0.278 | FALSE |
| Colton | B | AMYLIN           | -0.06 (-0.16 -0.05)  | 0.305 | 0.305 | FALSE |
| Colton | B | BCA 1            | -0.01 (-0.03 -0.01)  | 0.314 | 0.314 | FALSE |
| Colton | B | C PEPTIDE        | 0.02 (-0.03 -0.06)   | 0.529 | 0.529 | FALSE |
| Colton | B | CCL19 MIP3B      | 0.02 (-0.01 -0.04)   | 0.197 | 0.197 | FALSE |
| Colton | B | CCL20 MIP3A      | -0.00 (-0.05 -0.04)  | 0.839 | 0.839 | FALSE |
| Colton | B | CRP              | -0.03 (-0.08 -0.02)  | 0.202 | 0.202 | FALSE |
| Colton | B | CTACK            | -0.01 (-0.03 -0.01)  | 0.307 | 0.307 | FALSE |
| Colton | B | CXCL11 I TAC     | 0.00 (-0.03 -0.03)   | 0.910 | 0.910 | FALSE |
| Colton | B | CXCL6 GCP2       | 0.01 (-0.01 -0.03)   | 0.256 | 0.256 | FALSE |
| Colton | B | CXCL9 MIG        | -0.00 (-0.03 -0.02)  | 0.944 | 0.944 | FALSE |
| Colton | B | EGF              | 0.02 (-0.03 -0.07)   | 0.372 | 0.372 | FALSE |
| Colton | B | ENA 78           | 0.00 (-0.03 -0.03)   | 0.988 | 0.988 | FALSE |
| Colton | B | EOTAXIN 2        | -0.01 (-0.04 -0.03)  | 0.755 | 0.755 | FALSE |
| Colton | B | EOTAXIN          | 0.02 (0.00 -0.04)    | 0.033 | 0.034 | FALSE |
| Colton | B | G CSF            | 0.01 (-0.03 -0.04)   | 0.703 | 0.703 | FALSE |
| Colton | B | GIP              | -0.01 (-0.09 -0.08)  | 0.875 | 0.875 | FALSE |
| Colton | B | GRO              | -0.01 (-0.02 -0.01)  | 0.327 | 0.327 | FALSE |
| Colton | B | IL 13            | 0.25 (-0.06 -0.56)   | 0.117 | 0.156 | FALSE |
| Colton | B | IL 16            | 0.02 (-0.04 -0.08)   | 0.449 | 0.449 | FALSE |
| Colton | B | IL 17            | 0.01 (-0.12 -0.14)   | 0.865 | 0.865 | FALSE |
| Colton | B | IL 23            | -0.74 (-1.07 --0.41) | 0.000 | 0.000 | FALSE |
| Colton | B | IL 8             | 0.00 (-0.03 -0.03)   | 0.958 | 0.958 | FALSE |
| Colton | B | INSULIN          | 0.00 (-0.06 -0.07)   | 0.897 | 0.897 | FALSE |
| Colton | B | IP 10            | -0.00 (-0.02 -0.02)  | 0.693 | 0.693 | FALSE |
| Colton | B | LEPTIN           | -0.01 (-0.09 -0.06)  | 0.709 | 0.709 | FALSE |
| Colton | B | LIPOCALIN 2 NGAL | -0.03 (-0.10 -0.04)  | 0.428 | 0.428 | FALSE |
| Colton | B | MCP 1            | 0.01 (-0.00 -0.03)   | 0.114 | 0.114 | FALSE |
| Colton | B | MCP 2            | 0.00 (-0.02 -0.03)   | 0.871 | 0.871 | FALSE |
| Colton | B | MCP 4            | 0.02 (-0.01 -0.05)   | 0.277 | 0.277 | FALSE |
| Colton | B | MDC              | -0.00 (-0.02 -0.02)  | 0.994 | 0.994 | FALSE |
| Colton | B | MIP 1B           | 0.04 (0.02 -0.07)    | 0.001 | 0.001 | FALSE |
| Colton | B | MIP 1D           | -0.01 (-0.04 -0.02)  | 0.600 | 0.600 | FALSE |
| Colton | B | PAI 1            | 0.01 (-0.02 -0.03)   | 0.526 | 0.526 | FALSE |
| Colton | B | PP               | -0.12 (-0.21 --0.03) | 0.012 | 0.012 | FALSE |
| Colton | B | RESISTIN         | -0.01 (-0.05 -0.02)  | 0.398 | 0.398 | FALSE |
| Colton | B | SAA              | -0.02 (-0.06 -0.03)  | 0.406 | 0.406 | FALSE |
| Colton | B | SAP              | -0.02 (-0.04 -0.00)  | 0.107 | 0.107 | FALSE |
| Colton | B | SDF 1A B         | 0.01 (-0.01 -0.02)   | 0.447 | 0.447 | FALSE |
| Colton | B | SEGFR            | 0.01 (-0.00 -0.02)   | 0.058 | 0.058 | FALSE |
| Colton | B | SGP130           | -0.00 (-0.01 -0.01)  | 0.602 | 0.602 | FALSE |
| Colton | B | SIL4R            | -0.02 (-0.03 -0.00)  | 0.060 | 0.060 | FALSE |
| Colton | B | SIL6R            | 0.01 (-0.01 -0.02)   | 0.319 | 0.319 | FALSE |
| Colton | B | SILRII           | 0.00 (-0.01 -0.02)   | 0.791 | 0.791 | FALSE |
| Colton | B | STNFRI           | 0.01 (-0.01 -0.03)   | 0.189 | 0.189 | FALSE |



|        |   |                  |                      |       |       |       |
|--------|---|------------------|----------------------|-------|-------|-------|
| Colton | B | STNFR11          | 0.01 (-0.00 -0.02)   | 0.167 | 0.168 | FALSE |
| Colton | B | SVEGFR2          | 0.00 (-0.01 -0.01)   | 0.521 | 0.521 | FALSE |
| Colton | B | SVEGFR3          | 0.00 (-0.03 -0.04)   | 0.755 | 0.755 | FALSE |
| Colton | B | TARC             | 0.02 (-0.01 -0.04)   | 0.206 | 0.206 | FALSE |
| Colton | B | TGFA             | 0.02 (-0.03 -0.07)   | 0.429 | 0.429 | FALSE |
| Colton | B | TGF B1           | -0.00 (-0.05 -0.05)  | 0.941 | 0.941 | FALSE |
| Colton | B | TNFA             | 0.02 (0.01 -0.04)    | 0.012 | 0.012 | FALSE |
| Colton | B | TPO              | -0.03 (-0.11 -0.04)  | 0.425 | 0.425 | FALSE |
| Colton | B | TRAIL            | 0.01 (-0.01 -0.03)   | 0.434 | 0.434 | FALSE |
| Colton | B | VEGF             | 0.02 (-0.04 -0.08)   | 0.496 | 0.496 | FALSE |
| Colton | B | X6CKINE          | 0.03 (-0.00 -0.07)   | 0.075 | 0.075 | FALSE |
| Knops  | B | ADIPONECTIN      | -0.02 (-0.06 -0.03)  | 0.447 | 0.447 | FALSE |
| Knops  | B | ADIPSIN          | 0.00 (-0.02 -0.03)   | 0.644 | 0.644 | FALSE |
| Knops  | B | AMYLIN           | -0.05 (-0.14 -0.04)  | 0.289 | 0.290 | FALSE |
| Knops  | B | BCA 1            | 0.01 (-0.02 -0.03)   | 0.680 | 0.680 | FALSE |
| Knops  | B | C PEPTIDE        | -0.05 (-0.10 --0.00) | 0.035 | 0.036 | FALSE |
| Knops  | B | CCL19 MIP3B      | 0.01 (-0.01 -0.04)   | 0.266 | 0.266 | FALSE |
| Knops  | B | CCL20 MIP3A      | 0.04 (-0.01 -0.09)   | 0.086 | 0.086 | FALSE |
| Knops  | B | CRP              | 0.03 (-0.02 -0.08)   | 0.276 | 0.277 | FALSE |
| Knops  | B | CTACK            | -0.00 (-0.03 -0.02)  | 0.711 | 0.711 | FALSE |
| Knops  | B | CXCL11 I TAC     | -0.01 (-0.04 -0.02)  | 0.518 | 0.518 | FALSE |
| Knops  | B | CXCL6 GCP2       | 0.03 (0.01 -0.06)    | 0.003 | 0.003 | FALSE |
| Knops  | B | CXCL9 MIG        | 0.01 (-0.02 -0.04)   | 0.575 | 0.575 | FALSE |
| Knops  | B | EGF              | 0.03 (-0.01 -0.08)   | 0.176 | 0.176 | FALSE |
| Knops  | B | ENA 78           | 0.01 (-0.01 -0.04)   | 0.316 | 0.316 | FALSE |
| Knops  | B | EOTAXIN 2        | -0.01 (-0.05 -0.03)  | 0.589 | 0.589 | FALSE |
| Knops  | B | EOTAXIN          | 0.01 (-0.01 -0.04)   | 0.243 | 0.243 | FALSE |
| Knops  | B | G CSF            | 0.02 (-0.02 -0.06)   | 0.242 | 0.242 | FALSE |
| Knops  | B | GIP              | -0.03 (-0.10 -0.04)  | 0.451 | 0.451 | FALSE |
| Knops  | B | GRO              | 0.02 (0.00 -0.04)    | 0.017 | 0.017 | FALSE |
| Knops  | B | IL 16            | 0.05 (-0.01 -0.11)   | 0.118 | 0.118 | FALSE |
| Knops  | B | IL 17            | 0.06 (-0.08 -0.19)   | 0.407 | 0.407 | FALSE |
| Knops  | B | IL 23            | 0.19 (-0.36 -0.73)   | 0.506 | 0.511 | FALSE |
| Knops  | B | IL 8             | 0.01 (-0.03 -0.05)   | 0.510 | 0.510 | FALSE |
| Knops  | B | INSULIN          | -0.02 (-0.07 -0.04)  | 0.503 | 0.503 | FALSE |
| Knops  | B | IP 10            | 0.01 (-0.02 -0.03)   | 0.553 | 0.553 | FALSE |
| Knops  | B | LEPTIN           | 0.08 (0.03 -0.14)    | 0.004 | 0.004 | FALSE |
| Knops  | B | LIPOCALIN 2 NGAL | 0.06 (0.03 -0.09)    | 0.000 | 0.000 | FALSE |
| Knops  | B | MCP 1            | -0.00 (-0.02 -0.01)  | 0.620 | 0.620 | FALSE |
| Knops  | B | MCP 2            | 0.02 (-0.01 -0.05)   | 0.146 | 0.146 | FALSE |
| Knops  | B | MCP 4            | 0.05 (0.02 -0.09)    | 0.005 | 0.005 | FALSE |
| Knops  | B | MDC              | 0.02 (-0.00 -0.03)   | 0.070 | 0.070 | FALSE |
| Knops  | B | MIP 1B           | 0.00 (-0.03 -0.04)   | 0.929 | 0.929 | FALSE |
| Knops  | B | MIP 1D           | 0.00 (-0.03 -0.03)   | 0.840 | 0.840 | FALSE |
| Knops  | B | PAI 1            | 0.02 (0.00 -0.05)    | 0.037 | 0.037 | FALSE |
| Knops  | B | PP               | -0.02 (-0.09 -0.06)  | 0.669 | 0.669 | FALSE |
| Knops  | B | RESISTIN         | 0.04 (0.01 -0.06)    | 0.009 | 0.009 | FALSE |
| Knops  | B | SAA              | 0.02 (-0.04 -0.08)   | 0.446 | 0.446 | FALSE |
| Knops  | B | SAP              | -0.01 (-0.04 -0.01)  | 0.345 | 0.345 | FALSE |
| Knops  | B | SDF 1A B         | 0.01 (-0.01 -0.03)   | 0.324 | 0.324 | FALSE |
| Knops  | B | SEGFR            | -0.01 (-0.02 --0.00) | 0.048 | 0.048 | FALSE |
| Knops  | B | SGP130           | -0.00 (-0.01 -0.01)  | 0.689 | 0.689 | FALSE |
| Knops  | B | SIL4R            | -0.01 (-0.02 -0.01)  | 0.526 | 0.526 | FALSE |
| Knops  | B | SIL6R            | -0.00 (-0.01 -0.01)  | 0.775 | 0.775 | FALSE |

|       |   |                  |                      |       |       |       |
|-------|---|------------------|----------------------|-------|-------|-------|
| Knops | B | SILR11           | -0.01 (-0.03 -0.00)  | 0.162 | 0.162 | FALSE |
| Knops | B | STNFRI           | 0.00 (-0.01 -0.02)   | 0.659 | 0.659 | FALSE |
| Knops | B | STNFR11          | 0.00 (-0.01 -0.02)   | 0.751 | 0.751 | FALSE |
| Knops | B | SVEGFR2          | -0.00 (-0.02 -0.01)  | 0.640 | 0.640 | FALSE |
| Knops | B | SVEGFR3          | 0.01 (-0.02 -0.04)   | 0.574 | 0.574 | FALSE |
| Knops | B | TARC             | 0.00 (-0.03 -0.04)   | 0.795 | 0.795 | FALSE |
| Knops | B | TGF A            | 0.07 (0.01 -0.12)    | 0.014 | 0.014 | FALSE |
| Knops | B | TGF B1           | -0.05 (-0.10 -0.00)  | 0.056 | 0.056 | FALSE |
| Knops | B | TNFA             | 0.02 (-0.01 -0.05)   | 0.113 | 0.113 | FALSE |
| Knops | B | TPO              | 0.08 (0.00 -0.16)    | 0.046 | 0.046 | FALSE |
| Knops | B | TRAIL            | 0.01 (-0.02 -0.04)   | 0.392 | 0.392 | FALSE |
| Knops | B | VEGF             | 0.04 (-0.03 -0.10)   | 0.253 | 0.253 | FALSE |
| Knops | B | X6CKINE          | 0.02 (-0.02 -0.06)   | 0.280 | 0.280 | FALSE |
| Kell  | K | ADIPONECTIN      | 0.03 (-0.01 -0.06)   | 0.152 | 0.152 | FALSE |
| Kell  | K | ADIPSIN          | 0.01 (-0.01 -0.03)   | 0.570 | 0.570 | FALSE |
| Kell  | K | AMYLIN           | 0.01 (-0.10 -0.12)   | 0.826 | 0.826 | FALSE |
| Kell  | K | BCA 1            | -0.01 (-0.03 -0.01)  | 0.330 | 0.331 | FALSE |
| Kell  | K | C PEPTIDE        | 0.00 (-0.04 -0.05)   | 0.925 | 0.925 | FALSE |
| Kell  | K | CCL19 MIP3B      | -0.01 (-0.03 -0.01)  | 0.362 | 0.362 | FALSE |
| Kell  | K | CCL20 MIP3A      | 0.00 (-0.04 -0.04)   | 0.871 | 0.871 | FALSE |
| Kell  | K | CRP              | -0.01 (-0.05 -0.03)  | 0.682 | 0.682 | FALSE |
| Kell  | K | CTACK            | 0.01 (-0.00 -0.02)   | 0.217 | 0.217 | FALSE |
| Kell  | K | CXCL11 I TAC     | -0.00 (-0.03 -0.02)  | 0.944 | 0.944 | FALSE |
| Kell  | K | CXCL6 GCP2       | -0.00 (-0.02 -0.01)  | 0.689 | 0.689 | FALSE |
| Kell  | K | CXCL9 MIG        | -0.00 (-0.02 -0.02)  | 0.876 | 0.876 | FALSE |
| Kell  | K | EGF              | -0.00 (-0.04 -0.03)  | 0.815 | 0.815 | FALSE |
| Kell  | K | ENA 78           | -0.01 (-0.03 -0.01)  | 0.376 | 0.377 | FALSE |
| Kell  | K | EOTAXIN 2        | -0.02 (-0.04 -0.01)  | 0.319 | 0.319 | FALSE |
| Kell  | K | EOTAXIN          | -0.01 (-0.02 -0.01)  | 0.351 | 0.351 | FALSE |
| Kell  | K | G CSF            | -0.01 (-0.04 -0.02)  | 0.518 | 0.518 | FALSE |
| Kell  | K | GIP              | 0.01 (-0.07 -0.09)   | 0.814 | 0.814 | FALSE |
| Kell  | K | GRO              | -0.00 (-0.02 -0.01)  | 0.901 | 0.901 | FALSE |
| Kell  | K | IL 16            | -0.06 (-0.12 --0.01) | 0.018 | 0.018 | FALSE |
| Kell  | K | IL 17            | 0.08 (-0.04 -0.20)   | 0.168 | 0.168 | FALSE |
| Kell  | K | IL 23            | 0.39 (-0.18 -0.97)   | 0.180 | 0.190 | FALSE |
| Kell  | K | IL 8             | 0.01 (-0.03 -0.05)   | 0.613 | 0.613 | FALSE |
| Kell  | K | INSULIN          | -0.03 (-0.12 -0.06)  | 0.475 | 0.476 | FALSE |
| Kell  | K | IP 10            | -0.01 (-0.03 -0.01)  | 0.444 | 0.444 | FALSE |
| Kell  | K | LEPTIN           | -0.07 (-0.14 -0.00)  | 0.062 | 0.062 | FALSE |
| Kell  | K | LIPOCALIN 2 NGAL | 0.01 (-0.04 -0.05)   | 0.821 | 0.821 | FALSE |
| Kell  | K | MCP 1            | -0.00 (-0.02 -0.01)  | 0.475 | 0.475 | FALSE |
| Kell  | K | MCP 2            | -0.03 (-0.06 --0.01) | 0.017 | 0.017 | FALSE |
| Kell  | K | MCP 4            | -0.05 (-0.08 --0.02) | 0.003 | 0.003 | FALSE |
| Kell  | K | MDC              | 0.00 (-0.01 -0.02)   | 0.540 | 0.540 | FALSE |
| Kell  | K | MIP 1B           | -0.01 (-0.04 -0.01)  | 0.281 | 0.281 | FALSE |
| Kell  | K | MIP 1D           | -0.01 (-0.03 -0.02)  | 0.530 | 0.530 | FALSE |
| Kell  | K | PAI 1            | 0.01 (-0.02 -0.03)   | 0.517 | 0.517 | FALSE |
| Kell  | K | PP               | 0.01 (-0.08 -0.11)   | 0.768 | 0.768 | FALSE |
| Kell  | K | RESISTIN         | -0.01 (-0.04 -0.03)  | 0.650 | 0.650 | FALSE |
| Kell  | K | SAA              | 0.01 (-0.03 -0.05)   | 0.607 | 0.607 | FALSE |
| Kell  | K | SAP              | 0.00 (-0.01 -0.02)   | 0.792 | 0.792 | FALSE |
| Kell  | K | SDF 1A B         | -0.00 (-0.02 -0.01)  | 0.694 | 0.694 | FALSE |
| Kell  | K | SEGFR            | -0.00 (-0.01 -0.00)  | 0.403 | 0.403 | FALSE |
| Kell  | K | SGP130           | -0.01 (-0.02 --0.00) | 0.018 | 0.018 | FALSE |

|          |   |                  |                      |       |       |       |
|----------|---|------------------|----------------------|-------|-------|-------|
| Kell     | K | SIL4R            | 0.00 (-0.01 -0.02)   | 0.691 | 0.691 | FALSE |
| Kell     | K | SIL6R            | -0.01 (-0.02 --0.00) | 0.044 | 0.044 | FALSE |
| Kell     | K | SILRII           | -0.00 (-0.02 -0.01)  | 0.679 | 0.679 | FALSE |
| Kell     | K | STNFRI           | -0.01 (-0.03 --0.00) | 0.018 | 0.018 | FALSE |
| Kell     | K | STNFRII          | -0.01 (-0.02 --0.00) | 0.026 | 0.026 | FALSE |
| Kell     | K | SVEGFR2          | -0.01 (-0.02 -0.00)  | 0.317 | 0.317 | FALSE |
| Kell     | K | SVEGFR3          | -0.01 (-0.04 -0.02)  | 0.389 | 0.389 | FALSE |
| Kell     | K | TARC             | -0.01 (-0.04 -0.01)  | 0.234 | 0.234 | FALSE |
| Kell     | K | TGF A            | -0.02 (-0.07 -0.03)  | 0.395 | 0.395 | FALSE |
| Kell     | K | TGF B1           | 0.04 (-0.01 -0.08)   | 0.095 | 0.095 | FALSE |
| Kell     | K | TNFA             | -0.01 (-0.03 -0.01)  | 0.226 | 0.226 | FALSE |
| Kell     | K | TPO              | -0.01 (-0.07 -0.05)  | 0.740 | 0.740 | FALSE |
| Kell     | K | TRAIL            | -0.00 (-0.02 -0.01)  | 0.688 | 0.688 | FALSE |
| Kell     | K | VEGF             | -0.02 (-0.08 -0.03)  | 0.414 | 0.414 | FALSE |
| Kell     | K | X6CKINE          | -0.04 (-0.07 --0.01) | 0.018 | 0.018 | FALSE |
| Dombrock | B | ADIPONECTIN      | 0.02 (-0.01 -0.05)   | 0.216 | 0.041 | FALSE |
| Dombrock | B | ADIPSIN          | -0.00 (-0.02 -0.01)  | 0.786 | 0.899 | FALSE |
| Dombrock | B | AMYLIN           | 0.00 (-0.08 -0.08)   | 0.966 | 0.429 | FALSE |
| Dombrock | B | BCA 1            | 0.00 (-0.01 -0.02)   | 0.595 | 0.210 | FALSE |
| Dombrock | B | C PEPTIDE        | 0.02 (-0.02 -0.05)   | 0.385 | 0.214 | FALSE |
| Dombrock | B | CCL19 MIP3B      | -0.03 (-0.05 --0.01) | 0.001 | 0.003 | FALSE |
| Dombrock | B | CCL20 MIP3A      | -0.04 (-0.07 --0.01) | 0.012 | 0.040 | FALSE |
| Dombrock | B | CRP              | -0.02 (-0.05 -0.02)  | 0.285 | 0.487 | FALSE |
| Dombrock | B | CTACK            | 0.00 (-0.00 -0.01)   | 0.368 | 0.586 | FALSE |
| Dombrock | B | CXCL11 I TAC     | 0.00 (-0.02 -0.02)   | 0.751 | 0.902 | FALSE |
| Dombrock | B | CXCL6 GCP2       | -0.01 (-0.02 -0.01)  | 0.349 | 0.230 | FALSE |
| Dombrock | B | CXCL9 MIG        | -0.01 (-0.03 -0.00)  | 0.131 | 0.076 | FALSE |
| Dombrock | B | EGF              | 0.02 (-0.01 -0.06)   | 0.134 | 0.315 | FALSE |
| Dombrock | B | ENA 78           | -0.01 (-0.03 -0.00)  | 0.079 | 0.121 | FALSE |
| Dombrock | B | EOTAXIN 2        | 0.00 (-0.02 -0.02)   | 0.823 | 0.920 | FALSE |
| Dombrock | B | EOTAXIN          | 0.01 (-0.01 -0.02)   | 0.346 | 0.177 | FALSE |
| Dombrock | B | G CSF            | 0.01 (-0.01 -0.04)   | 0.328 | 0.300 | FALSE |
| Dombrock | B | GIP              | 0.02 (-0.04 -0.08)   | 0.561 | 0.812 | FALSE |
| Dombrock | B | GRO              | 0.00 (-0.01 -0.01)   | 0.536 | 0.554 | FALSE |
| Dombrock | B | IL 13            | -0.32 (-0.71 -0.08)  | 0.113 | 0.160 | FALSE |
| Dombrock | B | IL 16            | -0.01 (-0.05 -0.03)  | 0.595 | 0.515 | FALSE |
| Dombrock | B | IL 17            | -0.14 (-0.24 --0.04) | 0.008 | 0.030 | FALSE |
| Dombrock | B | IL 23            | 0.79 (0.28 -1.31)    | 0.002 | 0.014 | FALSE |
| Dombrock | B | IL 8             | 0.01 (-0.01 -0.04)   | 0.317 | 0.598 | FALSE |
| Dombrock | B | INSULIN          | 0.00 (-0.05 -0.05)   | 0.943 | 0.060 | FALSE |
| Dombrock | B | IP 10            | -0.01 (-0.02 -0.01)  | 0.228 | 0.479 | FALSE |
| Dombrock | B | LEPTIN           | 0.03 (-0.02 -0.09)   | 0.216 | 0.050 | FALSE |
| Dombrock | B | LIPOCALIN 2 NGAL | -0.02 (-0.06 -0.02)  | 0.349 | 0.620 | FALSE |
| Dombrock | B | MCP 1            | 0.01 (0.00 -0.02)    | 0.039 | 0.116 | FALSE |
| Dombrock | B | MCP 2            | 0.00 (-0.01 -0.02)   | 0.682 | 0.891 | FALSE |
| Dombrock | B | MCP 4            | -0.00 (-0.03 -0.02)  | 0.829 | 0.914 | FALSE |
| Dombrock | B | MDC              | -0.00 (-0.01 -0.01)  | 0.831 | 0.379 | FALSE |
| Dombrock | B | MIP 1B           | 0.02 (0.01 -0.04)    | 0.014 | 0.002 | FALSE |
| Dombrock | B | MIP 1D           | 0.01 (-0.01 -0.02)   | 0.266 | 0.201 | FALSE |
| Dombrock | B | PAI 1            | -0.01 (-0.03 -0.00)  | 0.146 | 0.326 | FALSE |
| Dombrock | B | PP               | 0.03 (-0.03 -0.10)   | 0.320 | 0.574 | FALSE |
| Dombrock | B | RESISTIN         | -0.00 (-0.03 -0.02)  | 0.763 | 0.428 | FALSE |
| Dombrock | B | SAA              | -0.03 (-0.06 -0.00)  | 0.094 | 0.246 | FALSE |
| Dombrock | B | SAP              | -0.00 (-0.02 -0.01)  | 0.469 | 0.769 | FALSE |

|          |   |                  |                      |       |       |       |
|----------|---|------------------|----------------------|-------|-------|-------|
| Dombrock | B | SDF 1A B         | 0.00 (-0.01 -0.01)   | 0.906 | 0.524 | FALSE |
| Dombrock | B | SEGFR            | 0.00 (-0.00 -0.01)   | 0.643 | 0.881 | FALSE |
| Dombrock | B | SGP130           | -0.00 (-0.01 -0.01)  | 0.772 | 0.725 | FALSE |
| Dombrock | B | SIL4R            | -0.01 (-0.03 --0.00) | 0.028 | 0.040 | FALSE |
| Dombrock | B | SIL6R            | 0.01 (-0.00 -0.01)   | 0.245 | 0.386 | FALSE |
| Dombrock | B | SILRII           | -0.00 (-0.02 -0.01)  | 0.441 | 0.685 | FALSE |
| Dombrock | B | STNFR1           | -0.00 (-0.01 -0.01)  | 0.925 | 0.945 | FALSE |
| Dombrock | B | STNFR11          | -0.01 (-0.02 -0.00)  | 0.089 | 0.211 | FALSE |
| Dombrock | B | SVEGFR2          | -0.00 (-0.01 -0.00)  | 0.267 | 0.495 | FALSE |
| Dombrock | B | SVEGFR3          | 0.01 (-0.01 -0.03)   | 0.342 | 0.636 | FALSE |
| Dombrock | B | TARC             | -0.00 (-0.02 -0.02)  | 0.900 | 0.854 | FALSE |
| Dombrock | B | TGF A            | -0.06 (-0.10 --0.03) | 0.001 | 0.002 | FALSE |
| Dombrock | B | TGF B1           | -0.00 (-0.04 -0.03)  | 0.797 | 0.948 | FALSE |
| Dombrock | B | TNFA             | 0.00 (-0.01 -0.02)   | 0.609 | 0.426 | FALSE |
| Dombrock | B | TPO              | -0.05 (-0.09 -0.00)  | 0.057 | 0.102 | FALSE |
| Dombrock | B | TRAIL            | 0.00 (-0.01 -0.02)   | 0.707 | 0.854 | FALSE |
| Dombrock | B | VEGF             | -0.01 (-0.05 -0.04)  | 0.720 | 0.592 | FALSE |
| Dombrock | B | X6CKINE          | -0.02 (-0.04 -0.01)  | 0.274 | 0.304 | FALSE |
| RhE      | E | ADIPONECTIN      | -0.01 (-0.03 -0.02)  | 0.639 | 0.640 | FALSE |
| RhE      | E | ADIPSIN          | -0.01 (-0.02 -0.01)  | 0.267 | 0.267 | FALSE |
| RhE      | E | AMYLIN           | -0.02 (-0.09 -0.05)  | 0.657 | 0.658 | FALSE |
| RhE      | E | BCA 1            | -0.00 (-0.02 -0.01)  | 0.677 | 0.677 | FALSE |
| RhE      | E | C PEPTIDE        | -0.01 (-0.05 -0.03)  | 0.575 | 0.575 | FALSE |
| RhE      | E | CCL19 MIP3B      | -0.02 (-0.03 --0.00) | 0.042 | 0.042 | FALSE |
| RhE      | E | CCL20 MIP3A      | -0.01 (-0.03 -0.02)  | 0.618 | 0.618 | FALSE |
| RhE      | E | CRP              | -0.02 (-0.05 -0.01)  | 0.265 | 0.265 | FALSE |
| RhE      | E | CTACK            | 0.01 (0.01 -0.02)    | 0.000 | 0.000 | FALSE |
| RhE      | E | CXCL11 I TAC     | -0.00 (-0.02 -0.02)  | 0.911 | 0.911 | FALSE |
| RhE      | E | CXCL6 GCP2       | 0.00 (-0.01 -0.01)   | 0.706 | 0.706 | FALSE |
| RhE      | E | CXCL9 MIG        | -0.00 (-0.02 -0.01)  | 0.569 | 0.569 | FALSE |
| RhE      | E | EGF              | 0.00 (-0.03 -0.03)   | 0.948 | 0.948 | FALSE |
| RhE      | E | ENA 78           | 0.01 (-0.00 -0.02)   | 0.160 | 0.160 | FALSE |
| RhE      | E | EOTAXIN 2        | 0.00 (-0.02 -0.02)   | 0.946 | 0.946 | FALSE |
| RhE      | E | EOTAXIN          | 0.00 (-0.01 -0.02)   | 0.656 | 0.656 | FALSE |
| RhE      | E | G CSF            | 0.00 (-0.02 -0.02)   | 0.988 | 0.988 | FALSE |
| RhE      | E | GIP              | -0.04 (-0.09 -0.02)  | 0.176 | 0.177 | FALSE |
| RhE      | E | GRO              | 0.00 (-0.01 -0.01)   | 0.800 | 0.800 | FALSE |
| RhE      | E | IL 13            | -0.02 (-0.16 -0.12)  | 0.753 | 0.768 | FALSE |
| RhE      | E | IL 16            | -0.03 (-0.07 -0.00)  | 0.082 | 0.082 | FALSE |
| RhE      | E | IL 17            | -0.01 (-0.10 -0.08)  | 0.792 | 0.792 | FALSE |
| RhE      | E | IL 23            | -0.49 (-1.01 -0.03)  | 0.064 | 0.076 | FALSE |
| RhE      | E | IL 8             | 0.00 (-0.02 -0.03)   | 0.698 | 0.698 | FALSE |
| RhE      | E | INSULIN          | 0.01 (-0.04 -0.06)   | 0.667 | 0.667 | FALSE |
| RhE      | E | IP 10            | -0.01 (-0.02 -0.00)  | 0.091 | 0.091 | FALSE |
| RhE      | E | LEPTIN           | 0.00 (-0.04 -0.05)   | 0.931 | 0.931 | FALSE |
| RhE      | E | LIPOCALIN 2 NGAL | -0.05 (-0.09 --0.00) | 0.030 | 0.031 | FALSE |
| RhE      | E | MCP 1            | -0.00 (-0.01 -0.01)  | 0.707 | 0.707 | FALSE |
| RhE      | E | MCP 2            | 0.01 (-0.01 -0.02)   | 0.302 | 0.302 | FALSE |
| RhE      | E | MCP 4            | 0.00 (-0.02 -0.03)   | 0.687 | 0.687 | FALSE |
| RhE      | E | MDC              | -0.00 (-0.01 -0.01)  | 0.793 | 0.793 | FALSE |
| RhE      | E | MIP 1B           | 0.01 (-0.01 -0.03)   | 0.179 | 0.179 | FALSE |
| RhE      | E | MIP 1D           | 0.01 (-0.00 -0.02)   | 0.103 | 0.103 | FALSE |
| RhE      | E | PAI 1            | -0.01 (-0.03 -0.00)  | 0.163 | 0.164 | FALSE |
| RhE      | E | PP               | -0.05 (-0.11 -0.01)  | 0.106 | 0.106 | FALSE |

|     |   |                  |                     |       |       |       |
|-----|---|------------------|---------------------|-------|-------|-------|
| RhE | E | RESISTIN         | -0.01 (-0.03 -0.02) | 0.660 | 0.660 | FALSE |
| RhE | E | SAA              | -0.01 (-0.04 -0.01) | 0.317 | 0.318 | FALSE |
| RhE | E | SAP              | -0.01 (-0.02 -0.00) | 0.181 | 0.181 | FALSE |
| RhE | E | SDF 1A B         | 0.01 (-0.00 -0.02)  | 0.237 | 0.237 | FALSE |
| RhE | E | SEGFR            | 0.00 (-0.00 -0.01)  | 0.133 | 0.133 | FALSE |
| RhE | E | SGP130           | 0.00 (-0.00 -0.01)  | 0.487 | 0.487 | FALSE |
| RhE | E | SIL4R            | -0.00 (-0.01 -0.01) | 0.884 | 0.884 | FALSE |
| RhE | E | SIL6R            | 0.00 (-0.00 -0.01)  | 0.247 | 0.247 | FALSE |
| RhE | E | SILRII           | 0.01 (0.00 -0.02)   | 0.013 | 0.014 | FALSE |
| RhE | E | STNFRI           | 0.01 (-0.00 -0.02)  | 0.134 | 0.134 | FALSE |
| RhE | E | STNFR II         | 0.00 (-0.00 -0.01)  | 0.361 | 0.361 | FALSE |
| RhE | E | SVEGFR2          | 0.00 (-0.01 -0.01)  | 0.579 | 0.579 | FALSE |
| RhE | E | SVEGFR3          | 0.01 (-0.01 -0.03)  | 0.193 | 0.193 | FALSE |
| RhE | E | TARC             | 0.01 (-0.01 -0.02)  | 0.314 | 0.314 | FALSE |
| RhE | E | TGF A            | -0.00 (-0.03 -0.03) | 0.962 | 0.962 | FALSE |
| RhE | E | TGF B1           | 0.01 (-0.02 -0.05)  | 0.413 | 0.413 | FALSE |
| RhE | E | TNFA             | -0.00 (-0.01 -0.01) | 0.934 | 0.934 | FALSE |
| RhE | E | TPO              | -0.03 (-0.07 -0.02) | 0.235 | 0.236 | FALSE |
| RhE | E | TRAIL            | 0.00 (-0.01 -0.02)  | 0.805 | 0.805 | FALSE |
| RhE | E | VEGF             | -0.01 (-0.05 -0.03) | 0.501 | 0.501 | FALSE |
| RhE | E | X6CKINE          | -0.00 (-0.02 -0.02) | 0.879 | 0.879 | FALSE |
| Aub | B | ADIPONECTIN      | -0.00 (-0.05 -0.04) | 0.853 | 0.473 | FALSE |
| Aub | B | ADIPSIN          | -0.01 (-0.03 -0.01) | 0.462 | 0.757 | FALSE |
| Aub | B | AMYLIN           | 0.00 (-0.10 -0.10)  | 0.963 | 0.449 | FALSE |
| Aub | B | BCA 1            | 0.01 (-0.01 -0.03)  | 0.511 | 0.413 | FALSE |
| Aub | B | C PEPTIDE        | -0.01 (-0.07 -0.05) | 0.658 | 0.774 | FALSE |
| Aub | B | CCL19 MIP3B      | 0.00 (-0.02 -0.03)  | 0.775 | 0.447 | FALSE |
| Aub | B | CCL20 MIP3A      | 0.01 (-0.04 -0.05)  | 0.811 | 0.251 | FALSE |
| Aub | B | CRP              | 0.05 (0.00 -0.09)   | 0.035 | 0.108 | FALSE |
| Aub | B | CTACK            | -0.00 (-0.01 -0.01) | 0.677 | 0.439 | FALSE |
| Aub | B | CXCL11 I TAC     | -0.02 (-0.05 -0.01) | 0.206 | 0.281 | FALSE |
| Aub | B | CXCL6 GCP2       | 0.01 (-0.01 -0.03)  | 0.480 | 0.125 | FALSE |
| Aub | B | CXCL9 MIG        | -0.01 (-0.03 -0.01) | 0.323 | 0.516 | FALSE |
| Aub | B | EGF              | -0.01 (-0.06 -0.04) | 0.676 | 0.023 | FALSE |
| Aub | B | ENA 78           | 0.01 (-0.02 -0.03)  | 0.566 | 0.767 | FALSE |
| Aub | B | EOTAXIN 2        | 0.02 (-0.01 -0.04)  | 0.307 | 0.508 | FALSE |
| Aub | B | EOTAXIN          | 0.02 (-0.00 -0.04)  | 0.100 | 0.259 | FALSE |
| Aub | B | G CSF            | -0.02 (-0.06 -0.01) | 0.204 | 0.392 | FALSE |
| Aub | B | GIP              | 0.02 (-0.06 -0.09)  | 0.673 | 0.823 | FALSE |
| Aub | B | GRO              | 0.01 (-0.00 -0.02)  | 0.182 | 0.380 | FALSE |
| Aub | B | IL 13            | -0.11 (-0.84 -0.62) | 0.772 | 0.229 | FALSE |
| Aub | B | IL 16            | -0.01 (-0.07 -0.04) | 0.650 | 0.860 | FALSE |
| Aub | B | IL 17            | -0.01 (-0.13 -0.11) | 0.859 | 0.904 | FALSE |
| Aub | B | IL 23            | -0.09 (-1.13 -0.96) | 0.870 | 0.885 | FALSE |
| Aub | B | IL 8             | -0.00 (-0.04 -0.03) | 0.942 | 0.457 | FALSE |
| Aub | B | INSULIN          | -0.00 (-0.07 -0.07) | 0.955 | 0.867 | FALSE |
| Aub | B | IP 10            | -0.01 (-0.03 -0.01) | 0.200 | 0.385 | FALSE |
| Aub | B | LEPTIN           | -0.04 (-0.11 -0.04) | 0.302 | 0.316 | FALSE |
| Aub | B | LIPOCALIN 2 NGAL | -0.02 (-0.09 -0.05) | 0.585 | 0.772 | FALSE |
| Aub | B | MCP 1            | 0.00 (-0.01 -0.02)  | 0.687 | 0.793 | FALSE |
| Aub | B | MCP 2            | 0.01 (-0.02 -0.03)  | 0.592 | 0.797 | FALSE |
| Aub | B | MCP 4            | -0.01 (-0.05 -0.03) | 0.572 | 0.830 | FALSE |
| Aub | B | MDC              | 0.00 (-0.01 -0.02)  | 0.590 | 0.864 | FALSE |
| Aub | B | MIP 1B           | -0.01 (-0.04 -0.02) | 0.617 | 0.740 | FALSE |

|          |   |                  |                      |       |       |       |
|----------|---|------------------|----------------------|-------|-------|-------|
| Aub      | B | MIP 1D           | -0.02 (-0.04 -0.01)  | 0.202 | 0.395 | FALSE |
| Aub      | B | PAI 1            | -0.01 (-0.03 -0.02)  | 0.495 | 0.635 | FALSE |
| Aub      | B | PP               | 0.03 (-0.05 -0.11)   | 0.470 | 0.158 | FALSE |
| Aub      | B | RESISTIN         | -0.01 (-0.04 -0.03)  | 0.693 | 0.262 | FALSE |
| Aub      | B | SAA              | 0.01 (-0.03 -0.06)   | 0.556 | 0.397 | FALSE |
| Aub      | B | SAP              | 0.01 (-0.01 -0.02)   | 0.325 | 0.396 | FALSE |
| Aub      | B | SDF 1A B         | -0.00 (-0.02 -0.02)  | 0.843 | 0.980 | FALSE |
| Aub      | B | SEGFR            | -0.00 (-0.01 -0.01)  | 0.950 | 0.898 | FALSE |
| Aub      | B | SGP130           | -0.00 (-0.01 -0.01)  | 0.520 | 0.788 | FALSE |
| Aub      | B | SIL4R            | -0.02 (-0.03 --0.00) | 0.033 | 0.048 | FALSE |
| Aub      | B | SIL6R            | -0.00 (-0.01 -0.01)  | 0.998 | 0.945 | FALSE |
| Aub      | B | SILRII           | -0.01 (-0.03 -0.00)  | 0.179 | 0.405 | FALSE |
| Aub      | B | STNFRI           | 0.00 (-0.01 -0.02)   | 0.527 | 0.819 | FALSE |
| Aub      | B | STNFRII          | 0.00 (-0.01 -0.01)   | 0.884 | 0.672 | FALSE |
| Aub      | B | SVEGFR2          | -0.01 (-0.02 -0.01)  | 0.362 | 0.290 | FALSE |
| Aub      | B | SVEGFR3          | -0.00 (-0.03 -0.03)  | 0.964 | 0.483 | FALSE |
| Aub      | B | TARC             | 0.01 (-0.02 -0.03)   | 0.446 | 0.581 | FALSE |
| Aub      | B | TGF A            | 0.02 (-0.03 -0.06)   | 0.498 | 0.345 | FALSE |
| Aub      | B | TGF B1           | -0.00 (-0.06 -0.06)  | 0.994 | 0.651 | FALSE |
| Aub      | B | TNFA             | 0.01 (-0.01 -0.03)   | 0.412 | 0.685 | FALSE |
| Aub      | B | TPO              | -0.02 (-0.09 -0.04)  | 0.518 | 0.080 | FALSE |
| Aub      | B | TRAIL            | -0.02 (-0.04 -0.01)  | 0.142 | 0.293 | FALSE |
| Aub      | B | VEGF             | 0.04 (-0.02 -0.10)   | 0.245 | 0.327 | FALSE |
| Aub      | B | X6CKINE          | 0.00 (-0.03 -0.04)   | 0.895 | 0.784 | FALSE |
| Lutheran | B | ADIPONECTIN      | -0.02 (-0.06 -0.02)  | 0.406 | 0.406 | FALSE |
| Lutheran | B | ADIPSIN          | -0.01 (-0.03 -0.02)  | 0.654 | 0.654 | FALSE |
| Lutheran | B | AMYLIN           | -0.03 (-0.15 -0.09)  | 0.604 | 0.604 | FALSE |
| Lutheran | B | BCA 1            | 0.02 (-0.00 -0.04)   | 0.097 | 0.097 | FALSE |
| Lutheran | B | C PEPTIDE        | 0.01 (-0.04 -0.07)   | 0.607 | 0.608 | FALSE |
| Lutheran | B | CCL19 MIP3B      | 0.01 (-0.01 -0.03)   | 0.298 | 0.298 | FALSE |
| Lutheran | B | CCL20 MIP3A      | 0.02 (-0.02 -0.06)   | 0.310 | 0.310 | FALSE |
| Lutheran | B | CRP              | 0.06 (0.01 -0.10)    | 0.009 | 0.009 | FALSE |
| Lutheran | B | CTACK            | 0.01 (-0.00 -0.02)   | 0.137 | 0.137 | FALSE |
| Lutheran | B | CXCL11 I TAC     | 0.03 (0.00 -0.05)    | 0.048 | 0.048 | FALSE |
| Lutheran | B | CXCL6 GCP2       | 0.01 (-0.01 -0.03)   | 0.221 | 0.221 | FALSE |
| Lutheran | B | CXCL9 MIG        | 0.01 (-0.02 -0.03)   | 0.471 | 0.471 | FALSE |
| Lutheran | B | EGF              | -0.01 (-0.05 -0.04)  | 0.730 | 0.730 | FALSE |
| Lutheran | B | ENA 78           | 0.00 (-0.02 -0.03)   | 0.812 | 0.812 | FALSE |
| Lutheran | B | EOTAXIN 2        | -0.01 (-0.04 -0.02)  | 0.456 | 0.456 | FALSE |
| Lutheran | B | EOTAXIN          | 0.00 (-0.02 -0.02)   | 0.802 | 0.802 | FALSE |
| Lutheran | B | G CSF            | 0.03 (-0.01 -0.06)   | 0.174 | 0.174 | FALSE |
| Lutheran | B | GIP              | 0.04 (-0.05 -0.13)   | 0.396 | 0.396 | FALSE |
| Lutheran | B | GRO              | -0.00 (-0.02 -0.01)  | 0.618 | 0.618 | FALSE |
| Lutheran | B | IL 13            | 0.40 (-0.11 -0.92)   | 0.126 | 0.157 | FALSE |
| Lutheran | B | IL 16            | -0.01 (-0.06 -0.05)  | 0.845 | 0.845 | FALSE |
| Lutheran | B | IL 17            | 0.11 (-0.02 -0.25)   | 0.104 | 0.105 | FALSE |
| Lutheran | B | IL 23            | 0.16 (-0.67 -0.99)   | 0.701 | 0.703 | FALSE |
| Lutheran | B | IL 8             | 0.01 (-0.03 -0.04)   | 0.679 | 0.679 | FALSE |
| Lutheran | B | INSULIN          | 0.03 (-0.04 -0.10)   | 0.447 | 0.447 | FALSE |
| Lutheran | B | IP 10            | 0.01 (-0.01 -0.03)   | 0.271 | 0.272 | FALSE |
| Lutheran | B | LEPTIN           | 0.00 (-0.08 -0.08)   | 0.985 | 0.985 | FALSE |
| Lutheran | B | LIPOCALIN 2 NGAL | 0.03 (-0.00 -0.07)   | 0.071 | 0.071 | FALSE |
| Lutheran | B | MCP 1            | -0.00 (-0.02 -0.01)  | 0.822 | 0.822 | FALSE |
| Lutheran | B | MCP 2            | -0.01 (-0.04 -0.02)  | 0.545 | 0.545 | FALSE |

|          |   |              |                     |       |       |       |
|----------|---|--------------|---------------------|-------|-------|-------|
| Lutheran | B | MCP 4        | -0.02 (-0.06 -0.01) | 0.158 | 0.158 | FALSE |
| Lutheran | B | MDC          | 0.00 (-0.01 -0.02)  | 0.703 | 0.703 | FALSE |
| Lutheran | B | MIP 1B       | 0.01 (-0.02 -0.04)  | 0.590 | 0.590 | FALSE |
| Lutheran | B | MIP 1D       | -0.01 (-0.03 -0.02) | 0.499 | 0.499 | FALSE |
| Lutheran | B | PAI 1        | 0.01 (-0.02 -0.04)  | 0.439 | 0.440 | FALSE |
| Lutheran | B | PP           | -0.02 (-0.09 -0.06) | 0.681 | 0.682 | FALSE |
| Lutheran | B | RESISTIN     | 0.01 (-0.02 -0.04)  | 0.614 | 0.614 | FALSE |
| Lutheran | B | SAA          | 0.05 (-0.00 -0.10)  | 0.071 | 0.071 | FALSE |
| Lutheran | B | SAP          | 0.01 (-0.00 -0.03)  | 0.065 | 0.065 | FALSE |
| Lutheran | B | SDF 1A B     | -0.00 (-0.02 -0.01) | 0.651 | 0.651 | FALSE |
| Lutheran | B | SEGFR        | -0.00 (-0.01 -0.01) | 0.975 | 0.975 | FALSE |
| Lutheran | B | SGP130       | 0.01 (-0.00 -0.02)  | 0.285 | 0.285 | FALSE |
| Lutheran | B | SIL4R        | -0.01 (-0.02 -0.01) | 0.208 | 0.208 | FALSE |
| Lutheran | B | SIL6R        | 0.01 (-0.00 -0.02)  | 0.168 | 0.168 | FALSE |
| Lutheran | B | SILRII       | -0.01 (-0.03 -0.00) | 0.136 | 0.136 | FALSE |
| Lutheran | B | STNFR1       | 0.00 (-0.01 -0.02)  | 0.458 | 0.458 | FALSE |
| Lutheran | B | STNFR2       | 0.01 (-0.01 -0.02)  | 0.340 | 0.340 | FALSE |
| Lutheran | B | SVEGFR2      | -0.00 (-0.01 -0.01) | 0.923 | 0.923 | FALSE |
| Lutheran | B | SVEGFR3      | 0.01 (-0.02 -0.04)  | 0.423 | 0.423 | FALSE |
| Lutheran | B | TARC         | -0.00 (-0.03 -0.02) | 0.798 | 0.798 | FALSE |
| Lutheran | B | TGF A        | 0.02 (-0.02 -0.07)  | 0.305 | 0.305 | FALSE |
| Lutheran | B | TGF B1       | -0.06 (-0.11 -0.01) | 0.018 | 0.018 | FALSE |
| Lutheran | B | TNFA         | -0.01 (-0.03 -0.01) | 0.559 | 0.559 | FALSE |
| Lutheran | B | TPO          | 0.02 (-0.05 -0.08)  | 0.635 | 0.635 | FALSE |
| Lutheran | B | TRAIL        | 0.01 (-0.02 -0.03)  | 0.623 | 0.623 | FALSE |
| Lutheran | B | VEGF         | 0.02 (-0.04 -0.08)  | 0.460 | 0.460 | FALSE |
| Lutheran | B | X6CKINE      | -0.03 (-0.07 -0.01) | 0.108 | 0.108 | FALSE |
| Duffy    | B | ADIPONECTIN  | -0.00 (-0.03 -0.02) | 0.783 | 0.321 | FALSE |
| Duffy    | B | ADIPSIN      | 0.00 (-0.02 -0.02)  | 0.982 | 0.446 | FALSE |
| Duffy    | B | AMYLIN       | -0.02 (-0.10 -0.05) | 0.558 | 0.244 | FALSE |
| Duffy    | B | BCA 1        | -0.01 (-0.02 -0.01) | 0.271 | 0.544 | FALSE |
| Duffy    | B | C PEPTIDE    | 0.01 (-0.03 -0.04)  | 0.793 | 0.802 | FALSE |
| Duffy    | B | CCL19 MIP3B  | -0.01 (-0.03 -0.00) | 0.149 | 0.351 | FALSE |
| Duffy    | B | CCL20 MIP3A  | -0.01 (-0.04 -0.02) | 0.463 | 0.661 | FALSE |
| Duffy    | B | CRP          | -0.01 (-0.04 -0.03) | 0.704 | 0.872 | FALSE |
| Duffy    | B | CTACK        | -0.00 (-0.01 -0.01) | 0.864 | 0.235 | FALSE |
| Duffy    | B | CXCL11 I TAC | 0.03 (0.01 -0.05)   | 0.003 | 0.008 | FALSE |
| Duffy    | B | CXCL6 GCP2   | 0.06 (0.05 -0.07)   | 0.000 | 0.000 | TRUE  |
| Duffy    | B | CXCL9 MIG    | -0.00 (-0.02 -0.02) | 0.826 | 0.859 | FALSE |
| Duffy    | B | EGF          | -0.02 (-0.05 -0.01) | 0.234 | 0.373 | FALSE |
| Duffy    | B | ENA 78       | 0.07 (0.06 -0.09)   | 0.000 | 0.000 | TRUE  |
| Duffy    | B | EOTAXIN 2    | 0.02 (-0.00 -0.04)  | 0.104 | 0.029 | FALSE |
| Duffy    | B | EOTAXIN      | 0.12 (0.10 -0.13)   | 0.000 | 0.000 | TRUE  |
| Duffy    | B | G CSF        | -0.01 (-0.04 -0.01) | 0.294 | 0.157 | FALSE |
| Duffy    | B | GIP          | 0.00 (-0.06 -0.06)  | 0.914 | 0.791 | FALSE |
| Duffy    | B | GRO          | 0.06 (0.05 -0.07)   | 0.000 | 0.000 | TRUE  |
| Duffy    | B | IL 13        | -0.32 (-0.65 -0.02) | 0.064 | 0.112 | FALSE |
| Duffy    | B | IL 16        | -0.00 (-0.04 -0.04) | 0.836 | 0.646 | FALSE |
| Duffy    | B | IL 17        | -0.08 (-0.18 -0.02) | 0.119 | 0.074 | FALSE |
| Duffy    | B | IL 23        | 0.24 (-0.26 -0.73)  | 0.344 | 0.001 | FALSE |
| Duffy    | B | IL 8         | 0.05 (0.03 -0.08)   | 0.000 | 0.000 | FALSE |
| Duffy    | B | INSULIN      | -0.02 (-0.07 -0.03) | 0.388 | 0.418 | FALSE |
| Duffy    | B | IP 10        | -0.00 (-0.02 -0.01) | 0.545 | 0.617 | FALSE |
| Duffy    | B | LEPTIN       | -0.01 (-0.06 -0.04) | 0.774 | 0.252 | FALSE |

|       |   |                  |                      |       |       |       |
|-------|---|------------------|----------------------|-------|-------|-------|
| Duffy | B | LIPOCALIN 2 NGAL | 0.01 (-0.02 -0.04)   | 0.674 | 0.054 | FALSE |
| Duffy | B | MCP 1            | 0.12 (0.11 -0.13)    | 0.000 | 0.000 | TRUE  |
| Duffy | B | MCP 2            | -0.03 (-0.05 --0.01) | 0.001 | 0.001 | FALSE |
| Duffy | B | MCP 4            | 0.15 (0.12 -0.17)    | 0.000 | 0.000 | TRUE  |
| Duffy | B | MDC              | 0.00 (-0.01 -0.01)   | 0.923 | 0.212 | FALSE |
| Duffy | B | MIP 1B           | 0.02 (0.00 -0.04)    | 0.040 | 0.121 | FALSE |
| Duffy | B | MIP 1D           | 0.01 (-0.00 -0.03)   | 0.120 | 0.206 | FALSE |
| Duffy | B | PAI 1            | -0.00 (-0.02 -0.02)  | 0.937 | 0.482 | FALSE |
| Duffy | B | PP               | 0.02 (-0.05 -0.08)   | 0.634 | 0.875 | FALSE |
| Duffy | B | RESISTIN         | 0.02 (-0.00 -0.04)   | 0.100 | 0.039 | FALSE |
| Duffy | B | SAA              | -0.03 (-0.06 -0.01)  | 0.129 | 0.196 | FALSE |
| Duffy | B | SAP              | -0.01 (-0.02 -0.00)  | 0.149 | 0.350 | FALSE |
| Duffy | B | SDF 1A B         | 0.01 (-0.00 -0.02)   | 0.266 | 0.286 | FALSE |
| Duffy | B | SEGFR            | -0.00 (-0.01 -0.01)  | 0.691 | 0.923 | FALSE |
| Duffy | B | SGP130           | -0.00 (-0.01 -0.01)  | 0.982 | 0.984 | FALSE |
| Duffy | B | SIL4R            | 0.01 (0.00 -0.02)    | 0.027 | 0.060 | FALSE |
| Duffy | B | SIL6R            | 0.00 (-0.00 -0.01)   | 0.376 | 0.675 | FALSE |
| Duffy | B | SILRII           | -0.00 (-0.01 -0.01)  | 0.712 | 0.934 | FALSE |
| Duffy | B | STNFR I          | -0.00 (-0.01 -0.01)  | 0.816 | 0.924 | FALSE |
| Duffy | B | STNFR II         | -0.00 (-0.01 -0.01)  | 0.720 | 0.891 | FALSE |
| Duffy | B | SVEGFR2          | 0.00 (-0.01 -0.01)   | 0.822 | 0.901 | FALSE |
| Duffy | B | SVEGFR3          | 0.01 (-0.01 -0.04)   | 0.191 | 0.211 | FALSE |
| Duffy | B | TARC             | 0.05 (0.03 -0.07)    | 0.000 | 0.000 | TRUE  |
| Duffy | B | TGFA             | -0.01 (-0.04 -0.02)  | 0.546 | 0.424 | FALSE |
| Duffy | B | TGF B1           | -0.01 (-0.04 -0.03)  | 0.740 | 0.927 | FALSE |
| Duffy | B | TNFA             | 0.00 (-0.01 -0.01)   | 0.994 | 0.997 | FALSE |
| Duffy | B | TPO              | -0.06 (-0.10 --0.01) | 0.024 | 0.078 | FALSE |
| Duffy | B | TRAIL            | -0.01 (-0.03 -0.01)  | 0.229 | 0.464 | FALSE |
| Duffy | B | VEGF             | -0.01 (-0.05 -0.03)  | 0.657 | 0.443 | FALSE |
| Duffy | B | XGCKINE          | 0.01 (-0.02 -0.03)   | 0.571 | 0.491 | FALSE |
| ABO   | A | ADIPONECTIN      | 0.03 (-0.01 -0.07)   | 0.206 | 0.006 | FALSE |
| ABO   | A | ADIPONECTIN      | -0.06 (-0.20 -0.07)  | 0.344 | 0.006 | FALSE |
| ABO   | A | ADIPSIN          | -0.01 (-0.04 -0.02)  | 0.439 | 0.786 | FALSE |
| ABO   | A | ADIPSIN          | -0.03 (-0.10 -0.04)  | 0.384 | 0.786 | FALSE |
| ABO   | A | AMYLIN           | -0.06 (-0.19 -0.07)  | 0.386 | 0.007 | FALSE |
| ABO   | A | AMYLIN           | -0.12 (-0.44 -0.20)  | 0.456 | 0.007 | FALSE |
| ABO   | A | BCA 1            | -0.01 (-0.04 -0.01)  | 0.329 | 0.211 | FALSE |
| ABO   | A | BCA 1            | 0.03 (-0.03 -0.09)   | 0.353 | 0.211 | FALSE |
| ABO   | A | C PEPTIDE        | -0.01 (-0.10 -0.08)  | 0.792 | 0.624 | FALSE |
| ABO   | A | C PEPTIDE        | 0.02 (-0.09 -0.14)   | 0.715 | 0.624 | FALSE |
| ABO   | A | CCL19 MIP3B      | 0.00 (-0.02 -0.03)   | 0.735 | 0.129 | FALSE |
| ABO   | A | CCL19 MIP3B      | 0.03 (-0.06 -0.12)   | 0.508 | 0.129 | FALSE |
| ABO   | A | CCL20 MIP3A      | 0.01 (-0.04 -0.07)   | 0.621 | 0.063 | FALSE |
| ABO   | A | CCL20 MIP3A      | 0.02 (-0.14 -0.18)   | 0.826 | 0.063 | FALSE |
| ABO   | A | CRP              | 0.05 (-0.01 -0.10)   | 0.108 | 0.318 | FALSE |
| ABO   | A | CRP              | 0.03 (-0.14 -0.20)   | 0.696 | 0.318 | FALSE |
| ABO   | A | CTACK            | -0.02 (-0.04 --0.01) | 0.009 | 0.066 | FALSE |
| ABO   | A | CTACK            | 0.01 (-0.03 -0.05)   | 0.695 | 0.066 | FALSE |
| ABO   | A | CXCL11 I TAC     | -0.02 (-0.05 -0.01)  | 0.228 | 0.000 | FALSE |
| ABO   | A | CXCL11 I TAC     | -0.04 (-0.12 -0.04)  | 0.365 | 0.000 | FALSE |
| ABO   | A | CXCL6 GCP2       | 0.01 (-0.01 -0.03)   | 0.302 | 0.005 | FALSE |
| ABO   | A | CXCL6 GCP2       | 0.03 (-0.03 -0.08)   | 0.303 | 0.005 | FALSE |
| ABO   | A | CXCL9 MIG        | -0.00 (-0.03 -0.03)  | 0.905 | 0.168 | FALSE |
| ABO   | A | CXCL9 MIG        | 0.03 (-0.07 -0.12)   | 0.571 | 0.168 | FALSE |



|     |   |                  |                       |       |       |       |
|-----|---|------------------|-----------------------|-------|-------|-------|
| ABO | A | EGF              | 0.06 (0.00 - 0.11)    | 0.038 | 0.205 | FALSE |
| ABO | A | EGF              | -0.03 (-0.19 - 0.13)  | 0.698 | 0.205 | FALSE |
| ABO | A | ENA 78           | 0.03 (-0.00 - 0.05)   | 0.061 | 0.530 | FALSE |
| ABO | A | ENA 78           | 0.03 (-0.05 - 0.10)   | 0.463 | 0.530 | FALSE |
| ABO | A | EOTAXIN 2        | 0.03 (-0.01 - 0.06)   | 0.109 | 0.142 | FALSE |
| ABO | A | EOTAXIN 2        | -0.08 (-0.21 - 0.04)  | 0.205 | 0.142 | FALSE |
| ABO | A | EOTAXIN          | 0.01 (-0.02 - 0.04)   | 0.458 | 0.146 | FALSE |
| ABO | A | EOTAXIN          | -0.01 (-0.04 - 0.03)  | 0.663 | 0.146 | FALSE |
| ABO | A | G CSF            | 0.03 (-0.02 - 0.07)   | 0.218 | 0.239 | FALSE |
| ABO | A | G CSF            | 0.04 (-0.08 - 0.16)   | 0.502 | 0.239 | FALSE |
| ABO | A | GIP              | 0.08 (-0.02 - 0.18)   | 0.107 | 0.003 | FALSE |
| ABO | A | GIP              | -0.00 (-0.18 - 0.18)  | 0.985 | 0.003 | FALSE |
| ABO | A | GRO              | 0.00 (-0.01 - 0.02)   | 0.776 | 0.663 | FALSE |
| ABO | A | GRO              | 0.01 (-0.05 - 0.07)   | 0.738 | 0.663 | FALSE |
| ABO | A | IL 16            | 0.02 (-0.05 - 0.09)   | 0.646 | 0.431 | FALSE |
| ABO | A | IL 16            | 0.06 (-0.17 - 0.30)   | 0.598 | 0.431 | FALSE |
| ABO | A | IL 17            | 0.00 (-0.17 - 0.18)   | 0.960 | 0.233 | FALSE |
| ABO | A | IL 17            | 0.15 (-0.34 - 0.64)   | 0.558 | 0.233 | FALSE |
| ABO | A | IL 8             | -0.00 (-0.04 - 0.04)  | 0.935 | 0.007 | FALSE |
| ABO | A | IL 8             | 0.11 (-0.04 - 0.25)   | 0.147 | 0.007 | FALSE |
| ABO | A | INSULIN          | 0.04 (-0.07 - 0.14)   | 0.519 | 0.084 | FALSE |
| ABO | A | INSULIN          | -0.02 (-0.18 - 0.14)  | 0.799 | 0.084 | FALSE |
| ABO | A | IP 10            | -0.01 (-0.03 - 0.01)  | 0.432 | 0.043 | FALSE |
| ABO | A | IP 10            | 0.05 (-0.01 - 0.11)   | 0.131 | 0.043 | FALSE |
| ABO | A | LEPTIN           | 0.01 (-0.08 - 0.11)   | 0.797 | 0.403 | FALSE |
| ABO | A | LEPTIN           | 0.03 (-0.24 - 0.31)   | 0.815 | 0.403 | FALSE |
| ABO | A | LIPOCALIN 2 NGAL | -0.11 (-0.23 - -0.00) | 0.046 | 0.084 | FALSE |
| ABO | A | LIPOCALIN 2 NGAL | 0.11 (-0.03 - 0.25)   | 0.133 | 0.084 | FALSE |
| ABO | A | MCP 1            | 0.01 (-0.00 - 0.03)   | 0.140 | 0.157 | FALSE |
| ABO | A | MCP 1            | -0.01 (-0.04 - 0.02)  | 0.619 | 0.157 | FALSE |
| ABO | A | MCP 2            | 0.02 (-0.00 - 0.05)   | 0.102 | 0.033 | FALSE |
| ABO | A | MCP 2            | -0.07 (-0.19 - 0.05)  | 0.224 | 0.033 | FALSE |
| ABO | A | MCP 4            | 0.01 (-0.03 - 0.05)   | 0.730 | 0.300 | FALSE |
| ABO | A | MCP 4            | 0.03 (-0.06 - 0.12)   | 0.481 | 0.300 | FALSE |
| ABO | A | MDC              | 0.00 (-0.01 - 0.02)   | 0.603 | 0.340 | FALSE |
| ABO | A | MDC              | 0.03 (-0.00 - 0.07)   | 0.076 | 0.340 | FALSE |
| ABO | A | MIP 1B           | 0.01 (-0.02 - 0.05)   | 0.482 | 0.806 | FALSE |
| ABO | A | MIP 1B           | 0.05 (-0.01 - 0.11)   | 0.128 | 0.806 | FALSE |
| ABO | A | MIP 1D           | -0.02 (-0.06 - 0.02)  | 0.328 | 0.135 | FALSE |
| ABO | A | MIP 1D           | -0.01 (-0.11 - 0.08)  | 0.765 | 0.135 | FALSE |
| ABO | A | PAI 1            | -0.01 (-0.04 - 0.03)  | 0.683 | 0.010 | FALSE |
| ABO | A | PAI 1            | -0.08 (-0.12 - -0.03) | 0.000 | 0.010 | FALSE |
| ABO | A | PP               | 0.09 (0.00 - 0.18)    | 0.040 | 0.085 | FALSE |
| ABO | A | PP               | 0.15 (-0.01 - 0.30)   | 0.064 | 0.085 | FALSE |
| ABO | A | RESISTIN         | -0.04 (-0.09 - -0.00) | 0.048 | 0.105 | FALSE |
| ABO | A | RESISTIN         | 0.06 (-0.02 - 0.13)   | 0.145 | 0.105 | FALSE |
| ABO | A | SAA              | 0.09 (0.02 - 0.16)    | 0.014 | 0.168 | FALSE |
| ABO | A | SAA              | 0.02 (-0.16 - 0.21)   | 0.810 | 0.168 | FALSE |
| ABO | A | SAP              | 0.01 (-0.01 - 0.03)   | 0.428 | 0.795 | FALSE |
| ABO | A | SAP              | -0.01 (-0.06 - 0.04)  | 0.614 | 0.795 | FALSE |
| ABO | A | SDF 1A B         | -0.02 (-0.04 - 0.00)  | 0.086 | 0.060 | FALSE |
| ABO | A | SDF 1A B         | 0.01 (-0.05 - 0.07)   | 0.718 | 0.060 | FALSE |
| ABO | A | SEGFR            | 0.01 (0.00 - 0.03)    | 0.044 | 0.080 | FALSE |
| ABO | A | SEGFR            | -0.01 (-0.04 - 0.02)  | 0.573 | 0.080 | FALSE |

|     |   |         |                       |       |       |       |
|-----|---|---------|-----------------------|-------|-------|-------|
| ABO | A | SGP130  | -0.02 (-0.04 - -0.01) | 0.007 | 0.000 | TRUE  |
| ABO | A | SGP130  | -0.01 (-0.04 - 0.02)  | 0.587 | 0.000 | TRUE  |
| ABO | A | SIL4R   | 0.01 (-0.02 - 0.03)   | 0.621 | 0.302 | FALSE |
| ABO | A | SIL4R   | 0.06 (0.00 - 0.13)    | 0.041 | 0.302 | FALSE |
| ABO | A | SIL6R   | 0.01 (-0.01 - 0.03)   | 0.285 | 0.569 | FALSE |
| ABO | A | SIL6R   | 0.02 (-0.02 - 0.06)   | 0.409 | 0.569 | FALSE |
| ABO | A | SILRII  | 0.01 (-0.01 - 0.03)   | 0.208 | 0.086 | FALSE |
| ABO | A | SILRII  | 0.01 (-0.04 - 0.05)   | 0.750 | 0.086 | FALSE |
| ABO | A | STNFRI  | 0.00 (-0.01 - 0.02)   | 0.630 | 0.396 | FALSE |
| ABO | A | STNFRI  | -0.01 (-0.04 - 0.02)  | 0.564 | 0.396 | FALSE |
| ABO | A | STNFRII | 0.00 (-0.02 - 0.02)   | 0.888 | 0.903 | FALSE |
| ABO | A | STNFRII | -0.00 (-0.04 - 0.03)  | 0.806 | 0.903 | FALSE |
| ABO | A | SVEGFR2 | -0.03 (-0.05 - -0.01) | 0.000 | 0.000 | TRUE  |
| ABO | A | SVEGFR2 | -0.02 (-0.06 - 0.01)  | 0.181 | 0.000 | TRUE  |
| ABO | A | SVEGFR3 | -0.09 (-0.14 - -0.05) | 0.000 | 0.000 | TRUE  |
| ABO | A | SVEGFR3 | 0.04 (-0.06 - 0.14)   | 0.470 | 0.000 | TRUE  |
| ABO | A | TARC    | 0.02 (-0.01 - 0.05)   | 0.294 | 0.755 | FALSE |
| ABO | A | TARC    | -0.00 (-0.08 - 0.08)  | 0.991 | 0.755 | FALSE |
| ABO | A | TGF A   | 0.05 (-0.01 - 0.11)   | 0.081 | 0.037 | FALSE |
| ABO | A | TGF A   | 0.10 (-0.01 - 0.21)   | 0.084 | 0.037 | FALSE |
| ABO | A | TGF B1  | 0.02 (-0.04 - 0.07)   | 0.528 | 0.545 | FALSE |
| ABO | A | TGF B1  | 0.05 (-0.06 - 0.17)   | 0.366 | 0.545 | FALSE |
| ABO | A | TNFA    | -0.01 (-0.03 - 0.02)  | 0.696 | 0.155 | FALSE |
| ABO | A | TNFA    | 0.02 (-0.03 - 0.06)   | 0.478 | 0.155 | FALSE |
| ABO | A | TPO     | 0.06 (-0.03 - 0.14)   | 0.186 | 0.269 | FALSE |
| ABO | A | TPO     | 0.03 (-0.24 - 0.30)   | 0.825 | 0.269 | FALSE |
| ABO | A | TRAIL   | -0.01 (-0.04 - 0.02)  | 0.557 | 0.491 | FALSE |
| ABO | A | TRAIL   | -0.11 (-0.27 - 0.05)  | 0.163 | 0.491 | FALSE |
| ABO | A | VEGF    | 0.07 (-0.01 - 0.14)   | 0.082 | 0.638 | FALSE |
| ABO | A | VEGF    | 0.03 (-0.21 - 0.26)   | 0.823 | 0.638 | FALSE |
| ABO | A | X6CKINE | 0.01 (-0.04 - 0.06)   | 0.764 | 0.273 | FALSE |
| ABO | A | X6CKINE | 0.01 (-0.12 - 0.14)   | 0.853 | 0.273 | FALSE |

Supplementary Table 6

| Estimate | Standard Error | T-Value | P-Value | Blood Group | Race     | Phenotype | Wald Joint P-Value | Marker     |
|----------|----------------|---------|---------|-------------|----------|-----------|--------------------|------------|
| -0.024   | 0.017          | -1.349  | 0.18    | ABO         | black    | A         | 0.01               | svegfr2    |
| 0.146    | 0.030          | 4.927   | 0.00    | ABO         | black    | AB        | 0.01               | svegfr2    |
| -0.013   | 0.026          | -0.522  | 0.60    | ABO         | black    | B         | 0.01               | svegfr2    |
| -0.034   | 0.027          | -1.289  | 0.20    | ABO         | asian    | A         | 0.26               | svegfr2    |
| 0.036    | 0.045          | 0.811   | 0.42    | ABO         | asian    | AB        | 0.26               | svegfr2    |
| 0.005    | 0.028          | 0.180   | 0.86    | ABO         | asian    | B         | 0.26               | svegfr2    |
| -0.135   | 0.058          | -2.339  | 0.03    | ABO         | hispanic | A         | 0.02               | svegfr2    |
| -0.221   | 0.091          | -2.439  | 0.02    | ABO         | hispanic | B         | 0.02               | svegfr2    |
| 0.001    | 0.044          | 0.029   | 0.98    | ABO         | black    | A         | 0.51               | svegfr3    |
| -0.222   | 0.194          | -1.144  | 0.25    | ABO         | black    | AB        | 0.51               | svegfr3    |
| -0.056   | 0.075          | -0.748  | 0.45    | ABO         | black    | B         | 0.51               | svegfr3    |
| 0.044    | 0.079          | 0.565   | 0.57    | ABO         | asian    | A         | 0.71               | svegfr3    |
| -0.029   | 0.091          | -0.323  | 0.75    | ABO         | asian    | AB        | 0.71               | svegfr3    |
| 0.065    | 0.073          | 0.883   | 0.38    | ABO         | asian    | B         | 0.71               | svegfr3    |
| 0.167    | 0.117          | 1.428   | 0.17    | ABO         | hispanic | A         | 0.03               | svegfr3    |
| -0.488   | 0.182          | -2.683  | 0.01    | ABO         | hispanic | B         | 0.03               | svegfr3    |
| -0.050   | 0.020          | -2.471  | 0.01    | ABO         | black    | A         | 0.00               | sgp130     |
| 0.083    | 0.030          | 2.776   | 0.01    | ABO         | black    | AB        | 0.00               | sgp130     |
| -0.039   | 0.027          | -1.426  | 0.16    | ABO         | black    | B         | 0.00               | sgp130     |
| 0.020    | 0.035          | 0.589   | 0.56    | ABO         | asian    | A         | 0.76               | sgp130     |
| 0.048    | 0.056          | 0.861   | 0.39    | ABO         | asian    | AB        | 0.76               | sgp130     |
| 0.019    | 0.033          | 0.572   | 0.57    | ABO         | asian    | B         | 0.76               | sgp130     |
| 0.007    | 0.039          | 0.168   | 0.87    | ABO         | hispanic | A         | 0.46               | sgp130     |
| -0.084   | 0.063          | -1.331  | 0.20    | ABO         | hispanic | B         | 0.46               | sgp130     |
| 0.151    | 0.078          | 1.952   | 0.05    | Duffy       | black    | FYA+B+    | 0.00               | eotaxin    |
| -0.081   | 0.062          | -1.298  | 0.20    | Duffy       | black    | FYA-B+    | 0.00               | eotaxin    |
| 0.485    | 0.064          | 7.601   | 0.02    | Duffy       | asian    | FYA+B+    | 0.02               | eotaxin    |
| 0.552    | 0.144          | 3.844   | 0.01    | Duffy       | hispanic | FYA+B+    | 0.03               | eotaxin    |
| 0.332    | 0.174          | 1.907   | 0.11    | Duffy       | hispanic | FYA-B+    | 0.03               | eotaxin    |
| -0.215   | 0.155          | -1.387  | 0.17    | Duffy       | black    | FYA+B+    | 0.44               | mcp_4      |
| -0.084   | 0.133          | -0.635  | 0.53    | Duffy       | black    | FYA-B+    | 0.44               | mcp_4      |
| 1.263    | 0.076          | 16.528  | 0.00    | Duffy       | asian    | FYA+B+    | 0.00               | mcp_4      |
| 0.643    | 0.114          | 5.627   | 0.00    | Duffy       | hispanic | FYA+B+    | 0.01               | mcp_4      |
| 0.920    | 0.197          | 4.660   | 0.01    | Duffy       | hispanic | FYA-B+    | 0.01               | mcp_4      |
| 0.058    | 0.114          | 0.510   | 0.61    | Duffy       | black    | FYA+B+    | 0.00               | ena_78     |
| 0.356    | 0.085          | 4.180   | 0.00    | Duffy       | black    | FYA-B+    | 0.00               | ena_78     |
| 0.232    | 0.128          | 1.815   | 0.21    | Duffy       | asian    | FYA+B+    | 0.22               | ena_78     |
| 0.178    | 0.075          | 2.378   | 0.08    | Duffy       | hispanic | FYA+B+    | 0.05               | ena_78     |
| 0.037    | 0.125          | 0.292   | 0.79    | Duffy       | hispanic | FYA-B+    | 0.05               | ena_78     |
| 0.039    | 0.067          | 0.579   | 0.56    | Duffy       | black    | FYA+B+    | 0.00               | mcp_1      |
| -0.102   | 0.045          | -2.273  | 0.02    | Duffy       | black    | FYA-B+    | 0.00               | mcp_1      |
| 1.097    | 0.070          | 15.732  | 0.00    | Duffy       | asian    | FYA+B+    | 0.00               | mcp_1      |
| 0.003    | 0.121          | 0.023   | 0.98    | Duffy       | hispanic | FYA+B+    | 0.20               | mcp_1      |
| 0.220    | 0.135          | 1.635   | 0.16    | Duffy       | hispanic | FYA-B+    | 0.20               | mcp_1      |
| 0.187    | 0.135          | 1.377   | 0.17    | Duffy       | black    | FYA+B+    | 0.00               | cxcl6_gcp2 |
| 0.356    | 0.108          | 3.307   | 0.00    | Duffy       | black    | FYA-B+    | 0.00               | cxcl6_gcp2 |
| 0.572    | 0.037          | 15.597  | 0.00    | Duffy       | asian    | FYA+B+    | 0.00               | cxcl6_gcp2 |
| 0.229    | 0.056          | 4.056   | 0.02    | Duffy       | hispanic | FYA+B+    | 0.05               | cxcl6_gcp2 |
| 0.167    | 0.117          | 1.424   | 0.23    | Duffy       | hispanic | FYA-B+    | 0.05               | cxcl6_gcp2 |
| -0.380   | 0.096          | -3.943  | 0.00    | Duffy       | black    | FYA+B+    | 0.00               | tarc       |
| 0.011    | 0.069          | 0.153   | 0.88    | Duffy       | black    | FYA-B+    | 0.00               | tarc       |
| 1.231    | 0.406          | 3.029   | 0.09    | Duffy       | asian    | FYA+B+    | 0.10               | tarc       |
| 0.396    | 0.139          | 2.844   | 0.05    | Duffy       | hispanic | FYA+B+    | 0.09               | tarc       |
| 0.234    | 0.259          | 0.904   | 0.42    | Duffy       | hispanic | FYA-B+    | 0.09               | tarc       |
| -0.015   | 0.101          | -0.145  | 0.89    | Duffy       | black    | FYA+B+    | 0.00               | gro        |
| 0.329    | 0.090          | 3.658   | 0.00    | Duffy       | black    | FYA-B+    | 0.00               | gro        |
| 0.682    | 0.033          | 20.806  | 0.00    | Duffy       | asian    | FYA+B+    | 0.00               | gro        |
| 0.212    | 0.123          | 1.727   | 0.14    | Duffy       | hispanic | FYA+B+    | 0.11               | gro        |
| 0.470    | 0.186          | 2.530   | 0.05    | Duffy       | hispanic | FYA-B+    | 0.11               | gro        |

Note: Not all racial groups had individuals with each given phenotype. Omitted levels denote instances where no individual in that racial category had that phenotype.

Supplementary Table 7

|                                          | <b>Lung</b>                                                                                                                 | <b>LungRep</b>                                                                                                                    | <b>NHL</b>                                                                        | <b>Ovarian</b>                                                                                  |
|------------------------------------------|-----------------------------------------------------------------------------------------------------------------------------|-----------------------------------------------------------------------------------------------------------------------------------|-----------------------------------------------------------------------------------|-------------------------------------------------------------------------------------------------|
| Cases                                    | 526                                                                                                                         | 526                                                                                                                               | 301                                                                               | 149                                                                                             |
| Controls                                 | 592                                                                                                                         | 625                                                                                                                               | 301                                                                               | 149                                                                                             |
| % Samples Collected<br>At Baseline       | 100                                                                                                                         | 100                                                                                                                               | 100                                                                               | 11.4                                                                                            |
| Median (IQR) Time to<br>Cancer Diagnosis | 2.9 (1.1 - 5.1)                                                                                                             | 3.7 (2.5 - 5.9)                                                                                                                   | 8.0 (5.0 - 13.9)                                                                  | 4.2 (2.8 - 6.7)                                                                                 |
| Eligibility Criteria                     | Blood Serum Available<br>Consent<br>No Cancer History<br>Complete Smoking History<br>No multiple cancers during follow up   | Blood Serum Available<br>Consent<br>No Cancer History<br>Complete Smoking History<br>No multiple cancers during follow up         | Blood Serum Available<br>Consent<br>No Cancer History                             | Blood Serum Available<br>Consent<br>No Cancer History<br>Female<br>No control with oophorectomy |
| Matching Criteria                        | 5 year age category<br>Sex<br>Randomization Year<br>Smoking Status<br>Cumulative Smoking at baseline<br>Time since quitting | 5 year age category<br>Sex<br>Study Year of Blood draw<br>Smoking Status<br>Cumulative Smoking at baseline<br>Time since quitting | 5 year age category<br>Race<br>Study Center<br>Time of blood draw (am/pm)<br>Date | 5 year age category<br>Race<br>Study Center<br>Time of blood draw (am/pm)<br>Date               |

| <b>Endometrial</b>                                                                              | <b>UpperGI</b>                                                               | <b>Colorectal</b>                                                                                                                                                                                                 |
|-------------------------------------------------------------------------------------------------|------------------------------------------------------------------------------|-------------------------------------------------------------------------------------------------------------------------------------------------------------------------------------------------------------------|
| 284                                                                                             | 63                                                                           | 171                                                                                                                                                                                                               |
| 284                                                                                             | 63                                                                           | 344                                                                                                                                                                                                               |
| 90.1                                                                                            | 80.2                                                                         | 87                                                                                                                                                                                                                |
| 5.3 (2.1 - 9.1)                                                                                 | 6.5 (3.6 - 9.5)                                                              | Not Reported                                                                                                                                                                                                      |
| Blood Serum Available<br>Consent<br>No Cancer History<br>Female<br>No control with hysterectomy | Blood Serum Available<br>Consent<br>No Cancer History                        | Blood Serum Available<br>Consent<br>No Cancer History<br>Complete Smoking History<br>Non-Hispanic White<br>Received Sigmoidoscopy<br>No self reported ulcerative colitis, Crohn's Gardner's or familial polyposis |
| 5 year age category<br>Race<br>Study Year of Blood draw<br>Randomization Year                   | 1 year age<br>Sex<br>Race<br>Study Year of Exit<br>Number Freeze/thaw cycles | Used Lung, NHL, Ovarian samples                                                                                                                                                                                   |

Supplementary Table 8

Mean(SD) Log-transformed Marker Concentration in Each Study

| Marker       | Studies                 | %Below LLOD | % Above ULOD | LungRep   | Endometrial | Lung       | NHL        | Ovarian    | Pilot1    | UpperGI    | Colorectal |
|--------------|-------------------------|-------------|--------------|-----------|-------------|------------|------------|------------|-----------|------------|------------|
| ADIPONECTIN  | EN GI CO                | 0.07        | 0.89         |           | 7.3 (0.3)   |            |            |            |           | 7.3 (0.5)  | 7.2 (0.3)  |
| ADIPSIN      | EN GI CO                | 0.07        | 0.14         |           | 6.6 (0.2)   |            |            |            |           | 6.5 (0.3)  | 6.7 (0.1)  |
| AMYLIN       | NH OVP1                 | 44.50       | 0.00         |           |             |            | 1.4 (0.3)  | 1.6 (0.3)  | 1.7 (0.2) |            |            |
| BCA_1        | LR EN LU NH P1 GI CO    | 0.02        | 0.02         | 1.4 (0.2) | 1.4 (0.2)   | 1.3 (0.3)  | 1.3 (0.2)  |            | 1.4 (0.3) | 1.3 (0.3)  | 1.4 (0.2)  |
| C_PEPTIDE    | NH OVP1                 | 0.30        | 0.00         |           |             |            | 3.3 (0.3)  | 3.4 (0.3)  | 3.3 (0.3) |            |            |
| CCL19_MIP3B  | LR EN LU NH P1 GI CO    | 0.07        | 0.00         | 2.0 (0.2) | 2.1 (0.2)   | 1.7 (0.2)  | 1.8 (0.3)  |            | 2.1 (0.3) | 2.1 (0.2)  | 2.1 (0.2)  |
| CCL20_MIP3A  | LR EN LU NH P1 GI CO    | 35.22       | 0.00         | 0.6 (0.5) | 0.5 (0.5)   | 0.6 (0.4)  | 0.6 (0.4)  |            | 0.8 (0.3) | 0.5 (0.3)  | 0.6 (0.5)  |
| CRP          | LR EN LU OVP1 GI CO     | 0.10        | 5.08         | 7.3 (0.4) | 7.3 (0.5)   | 6.7 (0.5)  |            | 7.0 (0.6)  | 6.7 (0.6) | 6.9 (0.5)  | 7.2 (0.5)  |
| CTACK        | LR EN LU NH P1 GI CO    | 0.00        | 0.02         | 2.9 (0.1) | 2.9 (0.1)   | 2.9 (0.1)  | 2.8 (0.1)  |            | 2.8 (0.2) | 2.9 (0.1)  | 2.9 (0.2)  |
| CXCL11_I_TAC | LR EN LU NH P1 GI CO    | 0.19        | 0.02         | 1.7 (0.3) | 1.7 (0.3)   | 1.5 (0.3)  | 1.5 (0.3)  |            | 1.6 (0.4) | 1.6 (0.3)  | 1.7 (0.3)  |
| CXCL6_GCP2   | LR EN LU NH P1 GI CO    | 0.07        | 0.00         | 1.9 (0.2) | 1.9 (0.2)   | 1.8 (0.2)  | 1.8 (0.2)  |            | 2.0 (0.2) | 1.7 (0.2)  | 1.9 (0.2)  |
| CXCL9_MIG    | LR EN LU NH P1 GI CO    | 0.07        | 0.00         | 3.0 (0.3) | 3.0 (0.3)   | 2.7 (0.3)  | 2.7 (0.3)  |            | 3.3 (0.3) | 3.0 (0.3)  | 3.0 (0.3)  |
| EGF          | LR EN LU NH OV P1 GI CO | 14.80       | 0.00         | 1.7 (0.4) | 1.8 (0.4)   | 1.8 (0.5)  | 1.4 (0.6)  | 1.6 (0.4)  | 1.9 (0.5) | 1.7 (0.6)  | 1.7 (0.4)  |
| ENA_78       | LR EN LU NH P1 GI CO    | 0.02        | 0.00         | 3.0 (0.2) | 3.1 (0.2)   | 2.9 (0.3)  | 2.8 (0.3)  |            | 3.0 (0.3) | 2.9 (0.2)  | 3.0 (0.3)  |
| EOTAXIN      | LR EN LU NH P1 GI CO    | 0.02        | 0.00         | 2.1 (0.2) | 2.0 (0.2)   | 2.0 (0.2)  | 1.8 (0.2)  | 1.8 (0.2)  | 2.1 (0.3) | 2.2 (0.3)  | 2.1 (0.2)  |
| EOTAXIN_2    | P1                      | 0.00        | 0.00         | 2.9 (0.3) | 2.9 (0.3)   | 3.0 (0.3)  | 2.9 (0.3)  |            | 3.0 (0.3) | 3.0 (0.3)  | 2.9 (0.3)  |
| EOTAXIN_3    | LR EN LU NH OV P1 GI CO | 0.20        | 0.00         |           |             |            |            |            | 1.3 (0.2) |            |            |
| FGF_2        | LR EN LU NH OV P1 GI CO | 65.53       | 0.05         | 1.2 (0.5) | 1.4 (0.6)   | 1.2 (0.5)  | 1.1 (0.4)  | 1.1 (0.4)  | 2.7 (0.2) | 1.3 (0.6)  | 1.3 (0.5)  |
| FLT_3L       | LU NH OV P1             | 89.83       | 0.00         |           |             | 1.0 (0.3)  | 0.3 (0.4)  | 0.3 (0.4)  | 1.6 (0.4) |            |            |
| FRACTALKINE  | LU NH OV P1 GI          | 77.70       | 0.00         |           |             | 1.2 (0.5)  | 1.0 (0.3)  | 1.0 (0.4)  | 1.8 (0.7) | 2.2 (0.3)  |            |
| G_CSF        | LR EN LU NH OV P1 GI CO | 45.00       | 0.00         | 1.3 (0.4) | 1.4 (0.4)   | 1.3 (0.4)  | 1.1 (0.3)  | 1.2 (0.4)  | 1.3 (0.4) | 1.2 (0.4)  | 1.3 (0.4)  |
| GHRELIN      | P1                      | 0.00        | 0.00         |           |             |            |            |            | 1.5 (0.3) |            |            |
| GIP          | NH OVP1                 | 0.60        | 0.00         |           |             |            | 1.4 (0.4)  | 1.7 (0.5)  | 1.6 (0.4) |            |            |
| GLP_1        | NH OVP1                 | 71.52       | 0.00         |           |             |            | 1.0 (0.3)  | 1.1 (0.4)  | 1.8 (0.4) |            |            |
| GLUCAGON     | NH OVP1                 | 74.29       | 0.11         |           |             |            | 1.0 (0.4)  | 1.5 (0.3)  | 1.8 (0.5) |            |            |
| GM_CSF       | LU NH OV P1 GI          | 59.09       | 0.00         |           |             | 0.5 (0.5)  | 0.1 (0.8)  | 0.6 (0.5)  | 1.4 (0.4) | 1.6 (0.6)  |            |
| GRO          | LR EN LU NH OV P1 GI CO | 0.05        | 0.05         | 2.7 (0.2) | 2.9 (0.1)   | 2.9 (0.2)  | 2.6 (0.2)  | 2.7 (0.2)  | 3.0 (0.2) | 2.9 (0.2)  | 2.8 (0.2)  |
| I_309        | P1                      | 0.00        | 0.00         |           |             |            |            |            | 0.4 (0.3) |            |            |
| IFNA2        | LU NH OV P1             | 84.66       | 0.00         |           |             | 1.0 (0.3)  | 0.4 (0.5)  | 0.4 (0.5)  | 1.3 (0.7) |            |            |
| IFNG         | LU NH OV P1             | 54.82       | 0.00         |           |             | 0.3 (0.9)  | 0.1 (0.8)  | 0.4 (0.4)  | 1.1 (0.5) |            |            |
| IL_10        | LU NH OV P1 GI          | 66.27       | 0.00         |           |             | -0.1 (0.7) | 0.5 (0.5)  | -0.0 (0.8) | 0.9 (0.3) | 0.9 (0.6)  |            |
| IL_11        | LU NH P1                | 72.37       | 0.00         |           |             | 0.6 (0.4)  | 0.6 (0.5)  |            | 1.9 (0.4) |            |            |
| IL_12P40     | LU NH OV P1             | 78.22       | 0.00         |           |             | 1.0 (0.4)  | 0.6 (0.6)  | 0.6 (0.7)  | 1.7 (0.5) |            |            |
| IL_12P70     | LU NH OV P1 GI          | 78.09       | 0.05         |           |             | -0.3 (0.6) | -0.2 (0.7) | 0.3 (0.4)  | 0.7 (0.6) | 0.3 (0.5)  |            |
| IL_13        | P1 GI                   | 9.80        | 0.00         |           |             |            |            |            | 0.6 (0.5) | 0.8 (0.8)  |            |
| IL_15        | LU NH OV P1             | 79.08       | 0.00         |           |             | -0.3 (0.5) | -0.2 (0.7) | -0.2 (0.6) | 0.5 (0.4) |            |            |
| IL_16        | LR EN LU NH P1 GI CO    | 38.39       | 0.02         | 1.2 (0.5) | 1.2 (0.5)   | 1.1 (0.5)  | 1.4 (0.4)  |            | 1.8 (0.4) | 1.6 (1.0)  | 1.2 (0.5)  |
| IL_17        | LU NH OV P1 GI          | 45.68       | 0.00         |           |             | 0.0 (0.7)  | 0.1 (0.7)  | 0.0 (0.5)  | 0.6 (0.5) | 0.7 (0.5)  |            |
| IL_1A        | LU NH OV P1             | 78.15       | 0.00         |           |             | 0.4 (0.6)  | 0.4 (0.5)  | 0.4 (0.5)  | 1.5 (0.4) |            |            |
| IL_1B        | LU NH OV P1 GI          | 68.30       | 0.00         |           |             | -0.2 (0.6) | -0.0 (0.8) | -0.1 (0.7) | 0.6 (0.6) | -0.2 (0.4) |            |
| IL_1RA       | LR EN LU NH OV P1 GI CO | 70.54       | 0.12         | 1.1 (0.4) | 1.2 (0.5)   | 1.1 (0.4)  | 1.2 (0.5)  | 0.7 (0.8)  | 1.1 (0.6) | 1.4 (0.8)  | 1.2 (0.5)  |
| IL_2         | LU NH OV P1             | 74.42       | 0.00         |           |             | -0.2 (0.6) | -0.0 (0.7) | -0.1 (0.7) | 0.4 (0.5) |            |            |
| IL_20        | P1                      | 0.00        | 0.00         |           |             |            |            |            | 2.3 (0.3) |            |            |
| IL_21        | GI                      | 72.22       | 0.00         |           |             |            |            |            | 1.2 (0.6) | -0.4 (0.5) |            |
| IL_23        | P1 GI                   | 6.32        | 0.00         |           |             |            |            |            | 2.5 (0.9) | 2.3 (0.8)  |            |
| IL_28A       | P1                      | 0.00        | 0.00         |           |             |            |            |            | 1.5 (0.6) |            |            |
| IL_29_IFNL1  | LR EN LU NH P1 GI CO    | 79.35       | 0.00         | 1.5 (0.3) | 1.6 (0.4)   | 1.5 (0.3)  | 2.0 (0.2)  |            | 2.3 (0.4) | 1.9 (0.5)  | 1.6 (0.4)  |
| IL_3         | LR EN LU NH OV GI CO    | 95.24       | 0.00         |           |             |            |            |            |           |            |            |
| IL_33        | LR EN LU NH P1 GI CO    | 74.70       | 0.05         | 0.7 (0.7) | 0.7 (0.6)   | 0.7 (0.7)  | 0.7 (0.7)  |            | 1.7 (0.8) | 0.9 (0.8)  | 0.7 (0.6)  |
| IL_4         | LU NH OV GI             | 74.14       | 0.05         |           |             | -0.2 (0.6) | 0.4 (0.5)  | 0.5 (0.5)  | 2.7 (NA)  | 1.1 (0.6)  |            |

|                  |                         |       |       |  |            |            |  |  |  |            |            |            |           |            |            |
|------------------|-------------------------|-------|-------|--|------------|------------|--|--|--|------------|------------|------------|-----------|------------|------------|
| IL_5             | LU NH OV P1 GI          | 81.54 | 0.00  |  |            |            |  |  |  | -0.4 (0.3) | -0.3 (0.4) | -0.4 (0.4) | 0.2 (0.5) | 0.2 (0.7)  |            |
| IL_6             | LU NH OV P1 GI          | 64.08 | 0.00  |  |            |            |  |  |  | -0.2 (0.6) | -0.0 (0.7) | -0.1 (0.6) | 0.7 (0.5) | 0.4 (0.4)  |            |
| IL_7             | LR EN LU NH OV P1 GI CO | 54.27 | 0.00  |  | 0.5 (0.3)  | 0.6 (0.3)  |  |  |  | 0.3 (0.3)  | 0.3 (0.3)  | 0.0 (0.5)  | 0.9 (0.5) | 0.5 (0.3)  | 0.6 (0.3)  |
| IL_8             | LR EN LU NH OV P1 GI CO | 1.33  | 0.00  |  | 1.1 (0.4)  | 1.1 (0.4)  |  |  |  | 1.0 (0.4)  | 0.7 (0.4)  | 0.6 (0.5)  | 1.2 (0.3) | 1.2 (0.6)  | 1.1 (0.4)  |
| IL_9             | P1                      | 0.00  | 0.00  |  |            |            |  |  |  |            |            |            | 0.7 (0.6) |            |            |
| INSULIN          | NH OV P1                | 4.30  | 0.00  |  |            |            |  |  |  |            | 2.7 (0.4)  | 2.8 (0.4)  | 2.9 (0.4) |            |            |
| IP_10            | LR EN LU NH OV P1 GI CO | 0.00  | 0.00  |  | 2.6 (0.2)  | 2.7 (0.2)  |  |  |  | 2.5 (0.2)  | 2.4 (0.2)  | 2.5 (0.2)  | 2.6 (0.3) | 2.6 (0.2)  | 2.6 (0.2)  |
| LEPTIN           | NH OV P1                | 0.10  | 0.20  |  |            |            |  |  |  |            | 3.9 (0.4)  | 4.2 (0.4)  | 4.1 (0.5) |            |            |
| LIF              | LU NH P1                | 93.12 | 0.00  |  |            |            |  |  |  |            |            |            |           |            |            |
| LIPOCALIN_2_NGAL | EN GI CO                | 1.09  | 0.00  |  |            | 5.2 (0.4)  |  |  |  |            |            |            |           | 5.4 (0.3)  | 5.3 (0.3)  |
| MCP_1            | LR EN LU NH OV P1 GI CO | 0.05  | 0.00  |  | 2.7 (0.2)  | 2.7 (0.2)  |  |  |  | 2.6 (0.2)  | 2.4 (0.2)  | 2.5 (0.2)  | 2.8 (0.2) | 2.8 (0.2)  | 2.7 (0.2)  |
| MCP_2            | LR EN LU NH P1 GI CO    | 2.82  | 0.00  |  | 1.6 (0.3)  | 1.6 (0.3)  |  |  |  | 1.6 (0.3)  | 1.6 (0.2)  |            | 1.7 (0.2) | 1.5 (0.2)  | 1.5 (0.3)  |
| MCP_3            | LU NH OV P1             | 82.36 | 0.00  |  |            |            |  |  |  | 1.0 (0.3)  | 1.0 (0.3)  | 1.0 (0.3)  | 1.3 (0.5) |            |            |
| MCP_4            | LR EN LU NH P1 GI CO    | 32.07 | 0.02  |  | 1.7 (0.4)  | 1.6 (0.4)  |  |  |  | 2.0 (0.3)  | 1.9 (0.4)  |            | 2.0 (0.3) | 1.8 (0.4)  | 1.6 (0.4)  |
| MDC              | LR EN LU NH OV P1 GI CO | 0.05  | 0.02  |  | 3.0 (0.2)  | 3.0 (0.2)  |  |  |  | 3.1 (0.2)  | 2.9 (0.2)  | 2.9 (0.2)  | 3.1 (0.2) | 2.9 (0.2)  | 3.0 (0.2)  |
| MIP_1A           | LU NH OV P1 GI          | 78.74 | 0.00  |  |            |            |  |  |  | 0.3 (0.2)  | -0.1 (0.6) | 0.3 (0.3)  | 1.5 (0.4) | 1.3 (0.3)  |            |
| MIP_1B           | LR EN LU NH OV P1 GI CO | 10.65 | 0.00  |  | 1.6 (0.3)  | 1.6 (0.3)  |  |  |  | 1.5 (0.4)  | 1.3 (0.4)  | 1.3 (0.3)  | 1.7 (0.3) | 1.4 (0.4)  | 1.6 (0.3)  |
| MIP_1D           | LR EN LU NH P1 GI CO    | 0.12  | 0.02  |  | 3.2 (0.2)  | 3.2 (0.2)  |  |  |  | 3.3 (0.2)  | 3.2 (0.2)  |            | 3.4 (0.4) | 3.3 (0.2)  | 3.2 (0.3)  |
| PAI_1            | EN GI CO                | 0.07  | 0.00  |  |            | 4.9 (0.2)  |  |  |  |            |            |            |           | 4.8 (0.2)  | 4.9 (0.2)  |
| PP               | NH OV P1                | 3.90  | 0.00  |  |            |            |  |  |  |            | 2.0 (0.5)  | 2.1 (0.4)  | 2.1 (0.3) |            |            |
| PYY              | NH OV P1                | 64.82 | 0.10  |  |            |            |  |  |  |            | 1.9 (0.3)  | 2.0 (0.3)  | 2.0 (0.3) |            |            |
| RESISTIN         | EN GI CO                | 0.48  | 0.00  |  |            | 4.4 (0.2)  |  |  |  |            |            |            |           | 4.5 (0.2)  | 4.4 (0.2)  |
| SAA              | LR EN LUP1 GI CO        | 1.07  | 0.48  |  | 6.8 (0.5)  | 6.9 (0.4)  |  |  |  | 6.6 (0.5)  |            |            | 6.9 (0.5) | 6.5 (0.6)  | 6.8 (0.5)  |
| SAP              | LR EN LUP1 GI CO        | 0.06  | 0.00  |  | 7.7 (0.1)  | 7.7 (0.1)  |  |  |  | 7.5 (0.2)  |            |            | 7.6 (0.2) | 7.0 (0.3)  | 7.7 (0.2)  |
| SCD30            | LU NH OV P1             | 95.63 | 0.00  |  |            |            |  |  |  |            |            |            |           |            |            |
| SCD40L           | LU NH OV P1             | 0.36  | 70.53 |  |            |            |  |  |  | 3.9 (0.4)  | 3.8 (0.4)  | 3.9 (0.3)  | 4.5 (0.8) |            |            |
| SCF              | LR EN LU NH P1 GI CO    | 59.94 | 0.02  |  | 0.3 (0.5)  | 0.4 (0.5)  |  |  |  | 0.7 (0.6)  | 0.4 (0.5)  |            | 1.4 (0.3) | 0.6 (0.6)  | 0.5 (0.5)  |
| SDF_1A_B         | LR EN LU NH P1 GI CO    | 0.05  | 0.02  |  | 3.5 (0.2)  | 3.5 (0.2)  |  |  |  | 3.4 (0.2)  | 3.5 (0.1)  |            | 3.3 (0.2) | 3.2 (0.2)  | 3.5 (0.2)  |
| SEGFR            | LR EN LU NH OV P1 GI CO | 0.00  | 0.00  |  | 4.9 (0.1)  | 5.0 (0.1)  |  |  |  | 4.7 (0.1)  | 4.7 (0.1)  | 4.7 (0.1)  | 4.6 (0.2) | 4.6 (0.1)  | 5.0 (0.1)  |
| SGP130           | LR EN LU NH OV P1 GI CO | 0.00  | 0.54  |  | 5.4 (0.1)  | 5.4 (0.1)  |  |  |  | 5.2 (0.2)  | 5.2 (0.1)  | 5.2 (0.1)  | 5.3 (0.3) | 5.3 (0.1)  | 5.4 (0.1)  |
| SIL_2RA          | LU NH OV P1             | 97.54 | 0.00  |  |            |            |  |  |  | 0.3 (0.5)  | 0.3 (0.3)  | 0.2 (0.2)  | 1.6 (0.5) |            |            |
| SIL1RI           | LU NH OV P1             | 89.96 | 0.00  |  |            |            |  |  |  |            |            |            |           |            |            |
| SIL4R            | LR EN LU NH OV P1 GI CO | 1.91  | 0.00  |  | 2.9 (0.1)  | 2.9 (0.2)  |  |  |  | 3.0 (0.1)  | 3.0 (0.1)  | 3.0 (0.1)  | 2.5 (0.3) | 2.4 (0.8)  | 2.9 (0.2)  |
| SIL6R            | LR EN LU NH OV P1 GI CO | 0.00  | 0.00  |  | 4.4 (0.1)  | 4.5 (0.1)  |  |  |  | 4.2 (0.2)  | 4.2 (0.1)  | 4.2 (0.1)  | 4.3 (0.2) | 4.3 (0.1)  | 4.4 (0.1)  |
| SILRII           | LR EN LU NH OV P1 GI CO | 0.16  | 0.00  |  | 3.8 (0.2)  | 3.8 (0.2)  |  |  |  | 3.7 (0.2)  | 3.7 (0.2)  | 3.7 (0.2)  | 3.8 (0.2) | 3.8 (0.2)  | 3.8 (0.2)  |
| SRAGE            | LU NH OV P1             | 91.36 | 0.00  |  |            |            |  |  |  |            |            |            |           |            |            |
| STNFR1           | LR EN LU NH OV P1 GI CO | 0.07  | 0.00  |  | 3.3 (0.1)  | 3.3 (0.1)  |  |  |  | 3.0 (0.2)  | 3.0 (0.1)  | 3.1 (0.1)  | 3.0 (0.3) | 2.9 (0.2)  | 3.3 (0.1)  |
| STNFR1I          | LR EN LU NH OV P1 GI CO | 0.00  | 0.00  |  | 4.0 (0.1)  | 3.9 (0.2)  |  |  |  | 3.7 (0.2)  | 3.7 (0.1)  | 3.7 (0.1)  | 3.7 (0.3) | 3.8 (0.1)  | 3.9 (0.1)  |
| SVEGFR2          | LU NH OV P1             | 0.00  | 0.00  |  | 4.2 (0.1)  | 4.2 (0.1)  |  |  |  | 4.1 (0.1)  | 4.1 (0.1)  | 4.1 (0.1)  | 3.8 (0.3) | 4.0 (0.1)  | 4.2 (0.1)  |
| SVEGFR3          | LR EN LU NH OV P1 GI CO | 0.00  | 0.00  |  | 3.3 (0.3)  | 3.4 (0.4)  |  |  |  | 3.1 (0.4)  | 3.0 (0.3)  | 3.0 (0.3)  | 3.1 (0.4) | 3.1 (0.3)  | 3.4 (0.3)  |
| SVEGFR1          | LR EN LU NH OV P1 GI CO | 12.64 | 0.00  |  |            |            |  |  |  |            |            |            |           |            |            |
| TARC             | LR EN LU NH P1 GI CO    | 0.02  | 0.02  |  | 2.0 (0.3)  | 1.9 (0.3)  |  |  |  | 2.1 (0.3)  | 1.9 (0.3)  |            | 2.1 (0.3) | 1.9 (0.3)  | 1.9 (0.3)  |
| TGF_A            | LR EN LU NH OV P1 GI CO | 20.98 | 0.05  |  | 0.3 (0.5)  | 0.4 (0.5)  |  |  |  | 0.2 (0.5)  | 0.2 (0.5)  | 0.2 (0.4)  | 0.8 (0.4) | -0.1 (0.7) | 0.3 (0.5)  |
| TGF_B1           | EN CO                   | 0.00  | 0.00  |  |            | 4.4 (0.1)  |  |  |  |            |            |            |           |            | 4.3 (0.1)  |
| TNF_B            | LR EN LU NH OV P1 GI CO | 70.90 | 0.00  |  | -0.2 (0.6) | -0.0 (0.8) |  |  |  | -0.2 (0.6) | 0.0 (0.8)  | -0.1 (0.7) | 0.9 (0.6) | 0.4 (1.3)  | -0.0 (0.8) |
| TNFA             | LR EN LU NH OV P1 GI CO | 0.52  | 0.00  |  | 0.9 (0.3)  | 1.0 (0.2)  |  |  |  | 0.8 (0.2)  | 0.7 (0.2)  | 0.7 (0.2)  | 0.9 (0.3) | 0.8 (0.2)  | 1.0 (0.2)  |
| TPO              | LR EN LU NH P1 GI CO    | 47.41 | 0.22  |  | 1.5 (0.8)  | 1.7 (0.7)  |  |  |  | 1.7 (0.6)  | 1.5 (0.8)  |            | 2.6 (0.4) | 1.6 (1.1)  | 1.6 (0.7)  |
| TRAIL            | LR EN LU NH P1 GI CO    | 1.09  | 0.02  |  | 1.6 (0.2)  | 1.6 (0.3)  |  |  |  | 1.3 (0.4)  | 1.5 (0.3)  |            | 1.5 (0.3) | 1.8 (0.2)  | 1.6 (0.2)  |
| TSLP             | LR EN LU NH P1 GI CO    | 80.83 | 0.07  |  | 0.3 (0.6)  | 0.3 (0.5)  |  |  |  | 0.3 (0.5)  | 0.3 (0.5)  |            | 1.2 (0.6) | 0.6 (0.7)  | 0.3 (0.5)  |
| VEGF             | LR EN LU NH OV P1 GI CO | 31.47 | 0.00  |  | 1.7 (0.6)  | 1.9 (0.6)  |  |  |  | 1.9 (0.7)  | 1.5 (0.6)  | 1.4 (0.6)  | 2.2 (0.3) | 1.8 (0.6)  | 1.8 (0.6)  |
| X6CKINE          | LR EN LU NH P1 GI CO    | 15.32 | 0.02  |  | 2.3 (0.4)  | 2.2 (0.4)  |  |  |  | 2.4 (0.3)  | 2.3 (0.4)  |            | 2.6 (0.3) | 2.3 (0.4)  | 2.3 (0.4)  |
| XCL1_LYMPHO      | P1                      | 0.00  | 0.00  |  |            |            |  |  |  |            |            |            | 1.9 (0.3) |            |            |
